# Supplementary material for: The out-of-field dose in radiation therapy induces delayed tumorigenesis by senescence evasion
Source: eLife journal article supplement (doi:10.7554/elife.67190), 2022-02-16
Supplement: fig3-data3 [file elife-67190-fig3-data3-v1.pdf]

| Col. stats |                                             | A              | B        | C         | D          |
|------------|---------------------------------------------|----------------|----------|-----------|------------|
|            |                                             | Non-irradiated | PTV      | -5 to +20 | +22 to +47 |
|            |                                             | Y              | Y        | Y         | Y          |
| 1          | Number of values                            | 35             | 40       | 44        | 45         |
| 2          |                                             |                |          |           |            |
| 3          | Minimum                                     | 0.0            | 0.0      | 0.2985    | 0.0        |
| 4          | 25% Percentile                              | 0.0            | 97.64    | 52.76     | 56.98      |
| 5          | Median                                      | 0.0            | 114.8    | 70.49     | 69.88      |
| 6          | 75% Percentile                              | 69.64          | 136.8    | 87.72     | 80.09      |
| 7          | Maximum                                     | 109.6          | 179.8    | 111.5     | 120.8      |
| 8          |                                             |                |          |           |            |
| 9          | Mean                                        | 31.23          | 114.4    | 68.20     | 65.95      |
| 10         | Std. Deviation                              | 39.75          | 34.19    | 26.61     | 28.76      |
| 11         | Std. Error of Mean                          | 6.719          | 5.405    | 4.012     | 4.288      |
| 12         |                                             |                |          |           |            |
| 13         | Lower 95% CI of mean                        | 17.58          | 103.4    | 60.11     | 57.31      |
| 14         | Upper 95% CI of mean                        | 44.89          | 125.3    | 76.29     | 74.59      |
| 15         |                                             |                |          |           |            |
| 16         | D'Agostino & Pearson omnibus normality test |                |          |           |            |
| 17         | K2                                          | 19.48          | 24.48    | 6.362     | 8.983      |
| 18         | P value                                     | < 0.0001       | < 0.0001 | 0.0415    | 0.0112     |
| 19         | Passed normality test (alpha=0.05)?         | No             | No       | No        | No         |
| 20         | P value summary                             | ****           | ****     | *         | *          |
| 21         |                                             |                |          |           |            |
| 22         | Sum                                         | 1093           | 4574     | 3001      | 2968       |

| 1way ANOVA<br>ANOVA |                                        |                  |
|---------------------|----------------------------------------|------------------|
| 1                   | Table Analyzed                         | temps 0h pH12 F6 |
| 2                   |                                        |                  |
| 3                   | Kruskal-Wallis test                    |                  |
| 4                   | P value                                | < 0.0001         |
| 5                   | Exact or approximate P value?          | Approximate      |
| 6                   | P value summary                        | ****             |
| 7                   | Do the medians vary signif. (P < 0.05) | Yes              |
| 8                   | Number of groups                       | 4                |
| 9                   | Kruskal-Wallis statistic               | 74.91            |
| 10                  |                                        |                  |
| 11                  | Data summary                           |                  |
| 12                  | Number of treatments (columns)         | 4                |
| 13                  | Number of values (total)               | 164              |

| 1way ANOVA<br>Multiple comparisons |                                  |                 |              |                 |    |    |
|------------------------------------|----------------------------------|-----------------|--------------|-----------------|----|----|
| 1                                  | Number of families               | 1               |              |                 |    |    |
| 2                                  | Number of comparisons per family | 3               |              |                 |    |    |
| 3                                  | Alpha                            | 0.05            |              |                 |    |    |
| 4                                  |                                  |                 |              |                 |    |    |
| 5                                  | Dunn's multiple comparisons test | Mean rank diff. | Significant? | Summary         |    |    |
| 6                                  |                                  |                 |              |                 |    |    |
| 7                                  | Non-irradiated vs. PTV           | -91.06          | Yes          | ****            |    |    |
| 8                                  | Non-irradiated vs. -5 to +20     | -32.52          | Yes          | **              |    |    |
| 9                                  | Non-irradiated vs. +22 to +47    | -28.88          | Yes          | *               |    |    |
| 10                                 |                                  |                 |              |                 |    |    |
| 11                                 |                                  |                 |              |                 |    |    |
| 12                                 | Test details                     | Mean rank 1     | Mean rank 2  | Mean rank diff. | n1 | n2 |
| 13                                 |                                  |                 |              |                 |    |    |
| 14                                 | Non-irradiated vs. PTV           | 43.64           | 134.7        | -91.06          | 35 | 40 |
| 15                                 | Non-irradiated vs. -5 to +20     | 43.64           | 76.16        | -32.52          | 35 | 44 |
| 16                                 | Non-irradiated vs. +22 to +47    | 43.64           | 72.52        | -28.88          | 35 | 45 |
