# Supplementary material for: The out-of-field dose in radiation therapy induces delayed tumorigenesis by senescence evasion
Source: eLife journal article supplement (doi:10.7554/elife.67190), 2022-02-16
Supplement: fig3-figsupp5-data2 [file elife-67190-fig3-figsupp5-data2-v1.pdf]

| Col. stats |                                             | A              | B      | C           | D            | E             | F              | G             | H              |
|------------|---------------------------------------------|----------------|--------|-------------|--------------|---------------|----------------|---------------|----------------|
|            |                                             | Non-irradiated | PTV    | -5 to +20mm | +45 to +60mm | +87 to +112mm | +162 to +187mm | +87 to +112mm | +162 to +187mm |
|            |                                             | Y              | Y      | Y           | Y            | Y             | Y              | Y             | Y              |
| 1          | Number of values                            | 25             | 26     | 30          | 33           | 24            | 34             | 34            | 48             |
| 2          |                                             |                |        |             |              |               |                |               |                |
| 3          | Minimum                                     | 0.0            | 0.0    | 0.0         | 0.0          | 0.0           | 0.0            | 0.0           | 0.0            |
| 4          | 25% Percentile                              | 0.0            | 4.000  | 2.000       | 1.500        | 1.000         | 2.000          | 0.0           | 0.0            |
| 5          | Median                                      | 3.000          | 7.500  | 4.000       | 4.000        | 3.000         | 4.000          | 1.000         | 1.000          |
| 6          | 75% Percentile                              | 4.000          | 14.75  | 7.250       | 15.00        | 12.75         | 10.25          | 2.500         | 4.000          |
| 7          | Maximum                                     | 13.00          | 24.00  | 30.00       | 46.00        | 22.00         | 32.00          | 57.00         | 14.00          |
| 8          |                                             |                |        |             |              |               |                |               |                |
| 9          | Mean                                        | 3.240          | 9.654  | 5.867       | 9.727        | 6.875         | 7.412          | 3.235         | 2.458          |
| 10         | Std. Deviation                              | 3.503          | 7.099  | 6.917       | 12.94        | 7.291         | 8.528          | 9.838         | 3.017          |
| 11         | Std. Error of Mean                          | 0.7007         | 1.392  | 1.263       | 2.253        | 1.488         | 1.463          | 1.687         | 0.4355         |
| 12         |                                             |                |        |             |              |               |                |               |                |
| 13         | Lower 95% CI of mean                        | 1.794          | 6.787  | 3.284       | 5.139        | 3.796         | 4.436          | -0.1974       | 1.582          |
| 14         | Upper 95% CI of mean                        | 4.686          | 12.52  | 8.450       | 14.32        | 9.954         | 10.39          | 6.668         | 3.334          |
| 15         |                                             |                |        |             |              |               |                |               |                |
| 16         | D'Agostino & Pearson omnibus normality test |                |        |             |              |               |                |               |                |
| 17         | K2                                          | 9.574          | 2.595  | 24.05       | 18.74        | 3.834         | 15.75          | 74.26         | 28.41          |
| 18         | P value                                     | 0.0083         | 0.2732 | < 0.0001    | < 0.0001     | 0.1471        | 0.0004         | < 0.0001      | < 0.0001       |
| 19         | Passed normality test (alpha=0.05)?         | No             | Yes    | No          | No           | Yes           | No             | No            | No             |
| 20         | P value summary                             | **             | ns     | ****        | ****         | ns            | ***            | ****          | ****           |
| 21         |                                             |                |        |             |              |               |                |               |                |
| 22         | Sum                                         | 81.00          | 251.0  | 176.0       | 321.0        | 165.0         | 252.0          | 110.0         | 118.0          |

| 1way ANOVA<br>ANOVA |                                        |             |
|---------------------|----------------------------------------|-------------|
| 1                   | Table Analyzed                         | XRCC1       |
| 2                   |                                        |             |
| 3                   | Kruskal-Wallis test                    |             |
| 4                   | P value                                | < 0.0001    |
| 5                   | Exact or approximate P value?          | Approximate |
| 6                   | P value summary                        | ****        |
| 7                   | Do the medians vary signif. (P < 0.05) | Yes         |
| 8                   | Number of groups                       | 8           |
| 9                   | Kruskal-Wallis statistic               | 47.32       |
| 10                  |                                        |             |
| 11                  | Data summary                           |             |
| 12                  | Number of treatments (columns)         | 8           |
| 13                  | Number of values (total)               | 254         |

| 1way ANOVA<br>Multiple comparisons |                                   |                 |              |                 |    |    |
|------------------------------------|-----------------------------------|-----------------|--------------|-----------------|----|----|
| 1                                  | Number of families                | 1               |              |                 |    |    |
| 2                                  | Number of comparisons per family  | 7               |              |                 |    |    |
| 3                                  | Alpha                             | 0.05            |              |                 |    |    |
| 4                                  |                                   |                 |              |                 |    |    |
| 5                                  | Dunn's multiple comparisons test  | Mean rank diff. | Significant? | Summary         |    |    |
| 6                                  |                                   |                 |              |                 |    |    |
| 7                                  | Non-irradiated vs. PTV            | -70.82          | Yes          | **              |    |    |
| 8                                  | Non-irradiated vs. -5 to +20mm    | -29.10          | No           | ns              |    |    |
| 9                                  | Non-irradiated vs. +45 to +60mm   | -42.38          | No           | ns              |    |    |
| 10                                 | Non-irradiated vs. +87 to +112mm  | -28.63          | No           | ns              |    |    |
| 11                                 | Non-irradiated vs. +162 to +187mm | -39.13          | No           | ns              |    |    |
| 12                                 | Non-irradiated vs. +87 to +112mm  | 30.47           | No           | ns              |    |    |
| 13                                 | Non-irradiated vs. +162 to +187mm | 14.16           | No           | ns              |    |    |
| 14                                 |                                   |                 |              |                 |    |    |
| 15                                 |                                   |                 |              |                 |    |    |
| 16                                 | Test details                      | Mean rank 1     | Mean rank 2  | Mean rank diff. | n1 | n2 |
| 17                                 |                                   |                 |              |                 |    |    |
| 18                                 | Non-irradiated vs. PTV            | 110.1           | 180.9        | -70.82          | 25 | 26 |
| 19                                 | Non-irradiated vs. -5 to +20mm    | 110.1           | 139.2        | -29.10          | 25 | 30 |
| 20                                 | Non-irradiated vs. +45 to +60mm   | 110.1           | 152.5        | -42.38          | 25 | 33 |
| 21                                 | Non-irradiated vs. +87 to +112mm  | 110.1           | 138.8        | -28.63          | 25 | 24 |
| 22                                 | Non-irradiated vs. +162 to +187mm | 110.1           | 149.3        | -39.13          | 25 | 34 |
| 23                                 | Non-irradiated vs. +87 to +112mm  | 110.1           | 79.65        | 30.47           | 25 | 34 |
| 24                                 | Non-irradiated vs. +162 to +187mm | 110.1           | 95.96        | 14.16           | 25 | 48 |
