# Supplementary material for: The out-of-field dose in radiation therapy induces delayed tumorigenesis by senescence evasion
Source: eLife journal article supplement (doi:10.7554/elife.67190), 2022-02-16
Supplement: fig5-figsupp1-data4 [file elife-67190-fig5-figsupp1-data4-v1.pdf]

| 1way ANOVA<br>ANOVA |                                        |             |
|---------------------|----------------------------------------|-------------|
| 1                   | Table Analyzed                         | 1x2 gy + 0h |
| 2                   |                                        |             |
| 3                   | Kruskal-Wallis test                    |             |
| 4                   | P value                                | < 0.0001    |
| 5                   | Exact or approximate P value?          | Approximate |
| 6                   | P value summary                        | ****        |
| 7                   | Do the medians vary signif. (P < 0.05) | Yes         |
| 8                   | Number of groups                       | 4           |
| 9                   | Kruskal-Wallis statistic               | 116.9       |
| 10                  |                                        |             |
| 11                  | Data summary                           |             |
| 12                  | Number of treatments (columns)         | 4           |
| 13                  | Number of values (total)               | 377         |

| 1way ANOVA<br>Multiple comparisons |                                            |                 |              |                 |     |     |
|------------------------------------|--------------------------------------------|-----------------|--------------|-----------------|-----|-----|
| 1                                  | Number of families                         | 1               |              |                 |     |     |
| 2                                  | Number of comparisons per family           | 3               |              |                 |     |     |
| 3                                  | Alpha                                      | 0.05            |              |                 |     |     |
| 4                                  |                                            |                 |              |                 |     |     |
| 5                                  | Dunn's multiple comparisons test           | Mean rank diff. | Significant? | Summary         |     |     |
| 6                                  |                                            |                 |              |                 |     |     |
| 7                                  | Non irradiated vs. PTV                     | -154.5          | Yes          | ****            |     |     |
| 8                                  | Non irradiated vs. margin from -5 to 20 mm | -34.19          | Yes          | *               |     |     |
| 9                                  | Non irradiated vs. margin from 22 to 47 mm | -11.27          | No           | ns              |     |     |
| 10                                 |                                            |                 |              |                 |     |     |
| 11                                 |                                            |                 |              |                 |     |     |
| 12                                 | Test details                               | Mean rank 1     | Mean rank 2  | Mean rank diff. | n1  | n2  |
| 13                                 |                                            |                 |              |                 |     |     |
| 14                                 | Non irradiated vs. PTV                     | 150.3           | 304.8        | -154.5          | 104 | 64  |
| 15                                 | Non irradiated vs. margin from -5 to 20 mm | 150.3           | 184.5        | -34.19          | 104 | 102 |
| 16                                 | Non irradiated vs. margin from 22 to 47 mm | 150.3           | 161.6        | -11.27          | 104 | 107 |

| 1way ANOVA<br>ANOVA |                                        |             |
|---------------------|----------------------------------------|-------------|
| 1                   | Table Analyzed                         | 1x2gy + 72h |
| 2                   |                                        |             |
| 3                   | Kruskal-Wallis test                    |             |
| 4                   | P value                                | 0.1274      |
| 5                   | Exact or approximate P value?          | Approximate |
| 6                   | P value summary                        | ns          |
| 7                   | Do the medians vary signif. (P < 0.05) | No          |
| 8                   | Number of groups                       | 4           |
| 9                   | Kruskal-Wallis statistic               | 5.695       |
| 10                  |                                        |             |
| 11                  | Data summary                           |             |
| 12                  | Number of treatments (columns)         | 4           |
| 13                  | Number of values (total)               | 399         |

| 1way ANOVA<br>Multiple comparisons |                                            |                 |              |                 |     |     |
|------------------------------------|--------------------------------------------|-----------------|--------------|-----------------|-----|-----|
| 1                                  | Number of families                         | 1               |              |                 |     |     |
| 2                                  | Number of comparisons per family           | 3               |              |                 |     |     |
| 3                                  | Alpha                                      | 0.05            |              |                 |     |     |
| 4                                  |                                            |                 |              |                 |     |     |
| 5                                  | Dunn's multiple comparisons test           | Mean rank diff. | Significant? | Summary         |     |     |
| 6                                  |                                            |                 |              |                 |     |     |
| 7                                  | Non irradiated vs. PTV                     | -13.91          | No           | ns              |     |     |
| 8                                  | Non irradiated vs. margin from -5 to 20 mm | -23.97          | No           | ns              |     |     |
| 9                                  | Non irradiated vs. margin from 22 to 47 mm | -5.679          | No           | ns              |     |     |
| 10                                 |                                            |                 |              |                 |     |     |
| 11                                 |                                            |                 |              |                 |     |     |
| 12                                 | Test details                               | Mean rank 1     | Mean rank 2  | Mean rank diff. | n1  | n2  |
| 13                                 |                                            |                 |              |                 |     |     |
| 14                                 | Non irradiated vs. PTV                     | 188.7           | 202.6        | -13.91          | 108 | 65  |
| 15                                 | Non irradiated vs. margin from -5 to 20 mm | 188.7           | 212.7        | -23.97          | 108 | 127 |
| 16                                 | Non irradiated vs. margin from 22 to 47 mm | 188.7           | 194.4        | -5.679          | 108 | 99  |

| 1way ANOVA<br>ANOVA |                                        |             |
|---------------------|----------------------------------------|-------------|
| 1                   | Table Analyzed                         | 5x2gy + 0h  |
| 2                   |                                        |             |
| 3                   | Kruskal-Wallis test                    |             |
| 4                   | P value                                | 0.0046      |
| 5                   | Exact or approximate P value?          | Approximate |
| 6                   | P value summary                        | **          |
| 7                   | Do the medians vary signif. (P < 0.05) | Yes         |
| 8                   | Number of groups                       | 4           |
| 9                   | Kruskal-Wallis statistic               | 13.04       |
| 10                  |                                        |             |
| 11                  | Data summary                           |             |
| 12                  | Number of treatments (columns)         | 4           |
| 13                  | Number of values (total)               | 573         |

| 1way ANOVA<br>Multiple comparisons |                                            |                 |              |                 |     |     |
|------------------------------------|--------------------------------------------|-----------------|--------------|-----------------|-----|-----|
| 1                                  | Number of families                         | 1               |              |                 |     |     |
| 2                                  | Number of comparisons per family           | 3               |              |                 |     |     |
| 3                                  | Alpha                                      | 0.05            |              |                 |     |     |
| 4                                  |                                            |                 |              |                 |     |     |
| 5                                  | Dunn's multiple comparisons test           | Mean rank diff. | Significant? | Summary         |     |     |
| 6                                  |                                            |                 |              |                 |     |     |
| 7                                  | Non irradiated vs. PTV                     | -58.72          | Yes          | **              |     |     |
| 8                                  | Non irradiated vs. margin from -5 to 20 mm | -22.25          | No           | ns              |     |     |
| 9                                  | Non irradiated vs. margin from 22 to 47 mm | -34.58          | No           | ns              |     |     |
| 10                                 |                                            |                 |              |                 |     |     |
| 11                                 |                                            |                 |              |                 |     |     |
| 12                                 | Test details                               | Mean rank 1     | Mean rank 2  | Mean rank diff. | n1  | n2  |
| 13                                 |                                            |                 |              |                 |     |     |
| 14                                 | Non irradiated vs. PTV                     | 257.4           | 316.2        | -58.72          | 137 | 142 |
| 15                                 | Non irradiated vs. margin from -5 to 20 mm | 257.4           | 279.7        | -22.25          | 137 | 127 |
| 16                                 | Non irradiated vs. margin from 22 to 47 mm | 257.4           | 292.0        | -34.58          | 137 | 167 |

| 1way ANOVA<br>ANOVA |                                        |             |
|---------------------|----------------------------------------|-------------|
| 1                   | Table Analyzed                         | 5x2gy + 72h |
| 2                   |                                        |             |
| 3                   | Kruskal-Wallis test                    |             |
| 4                   | P value                                | 0.0325      |
| 5                   | Exact or approximate P value?          | Approximate |
| 6                   | P value summary                        | *           |
| 7                   | Do the medians vary signif. (P < 0.05) | Yes         |
| 8                   | Number of groups                       | 4           |
| 9                   | Kruskal-Wallis statistic               | 8.771       |
| 10                  |                                        |             |
| 11                  | Data summary                           |             |
| 12                  | Number of treatments (columns)         | 4           |
| 13                  | Number of values (total)               | 378         |

| 1way ANOVA<br>Multiple comparisons |                                            |                 |              |                 |    |     |
|------------------------------------|--------------------------------------------|-----------------|--------------|-----------------|----|-----|
| 1                                  | Number of families                         | 1               |              |                 |    |     |
| 2                                  | Number of comparisons per family           | 3               |              |                 |    |     |
| 3                                  | Alpha                                      | 0.05            |              |                 |    |     |
| 4                                  |                                            |                 |              |                 |    |     |
| 5                                  | Dunn's multiple comparisons test           | Mean rank diff. | Significant? | Summary         |    |     |
| 6                                  |                                            |                 |              |                 |    |     |
| 7                                  | Non irradiated vs. PTV                     | -8.869          | No           | ns              |    |     |
| 8                                  | Non irradiated vs. margin from -5 to 20 mm | 13.82           | No           | ns              |    |     |
| 9                                  | Non irradiated vs. margin from 22 to 47 mm | 17.49           | No           | ns              |    |     |
| 10                                 |                                            |                 |              |                 |    |     |
| 11                                 |                                            |                 |              |                 |    |     |
| 12                                 | Test details                               | Mean rank 1     | Mean rank 2  | Mean rank diff. | n1 | n2  |
| 13                                 |                                            |                 |              |                 |    |     |
| 14                                 | Non irradiated vs. PTV                     | 195.6           | 204.5        | -8.869          | 93 | 89  |
| 15                                 | Non irradiated vs. margin from -5 to 20 mm | 195.6           | 181.8        | 13.82           | 93 | 92  |
| 16                                 | Non irradiated vs. margin from 22 to 47 mm | 195.6           | 178.1        | 17.49           | 93 | 104 |



| 1way ANOVA<br>ANOVA |                                        |             |
|---------------------|----------------------------------------|-------------|
| 1                   | Table Analyzed                         | 10x2gy+0h   |
| 2                   |                                        |             |
| 3                   | Kruskal-Wallis test                    |             |
| 4                   | P value                                | < 0.0001    |
| 5                   | Exact or approximate P value?          | Approximate |
| 6                   | P value summary                        | ****        |
| 7                   | Do the medians vary signif. (P < 0.05) | Yes         |
| 8                   | Number of groups                       | 4           |
| 9                   | Kruskal-Wallis statistic               | 32.86       |
| 10                  |                                        |             |
| 11                  | Data summary                           |             |
| 12                  | Number of treatments (columns)         | 4           |
| 13                  | Number of values (total)               | 424         |

| 1way ANOVA<br>Multiple comparisons |                                            |                 |              |                 |    |     |
|------------------------------------|--------------------------------------------|-----------------|--------------|-----------------|----|-----|
| 1                                  | Number of families                         | 1               |              |                 |    |     |
| 2                                  | Number of comparisons per family           | 3               |              |                 |    |     |
| 3                                  | Alpha                                      | 0.05            |              |                 |    |     |
| 4                                  |                                            |                 |              |                 |    |     |
| 5                                  | Dunn's multiple comparisons test           | Mean rank diff. | Significant? | Summary         |    |     |
| 6                                  |                                            |                 |              |                 |    |     |
| 7                                  | Non irradiated vs. PTV                     | -51.50          | Yes          | **              |    |     |
| 8                                  | Non irradiated vs. margin from -5 to 20 mm | -0.3684         | No           | ns              |    |     |
| 9                                  | Non irradiated vs. margin from 22 to 47 mm | 18.76           | No           | ns              |    |     |
| 10                                 |                                            |                 |              |                 |    |     |
| 11                                 |                                            |                 |              |                 |    |     |
| 12                                 | Test details                               | Mean rank 1     | Mean rank 2  | Mean rank diff. | n1 | n2  |
| 13                                 |                                            |                 |              |                 |    |     |
| 14                                 | Non irradiated vs. PTV                     | 206.5           | 258.0        | -51.50          | 77 | 103 |
| 15                                 | Non irradiated vs. margin from -5 to 20 mm | 206.5           | 206.8        | -0.3684         | 77 | 96  |
| 16                                 | Non irradiated vs. margin from 22 to 47 mm | 206.5           | 187.7        | 18.76           | 77 | 148 |

| 1way ANOVA<br>ANOVA |                                        |              |
|---------------------|----------------------------------------|--------------|
| 1                   | Table Analyzed                         | 10x2gy + 72h |
| 2                   |                                        |              |
| 3                   | Kruskal-Wallis test                    |              |
| 4                   | P value                                | 0.3718       |
| 5                   | Exact or approximate P value?          | Approximate  |
| 6                   | P value summary                        | ns           |
| 7                   | Do the medians vary signif. (P < 0.05) | No           |
| 8                   | Number of groups                       | 3            |
| 9                   | Kruskal-Wallis statistic               | 1.979        |
| 10                  |                                        |              |
| 11                  | Data summary                           |              |
| 12                  | Number of treatments (columns)         | 3            |
| 13                  | Number of values (total)               | 337          |

| 1way ANOVA<br>Multiple comparisons |                                            |                 |              |                 |     |     |
|------------------------------------|--------------------------------------------|-----------------|--------------|-----------------|-----|-----|
| 1                                  | Number of families                         | 1               |              |                 |     |     |
| 2                                  | Number of comparisons per family           | 2               |              |                 |     |     |
| 3                                  | Alpha                                      | 0.05            |              |                 |     |     |
| 4                                  |                                            |                 |              |                 |     |     |
| 5                                  | Dunn's multiple comparisons test           | Mean rank diff. | Significant? | Summary         |     |     |
| 6                                  |                                            |                 |              |                 |     |     |
| 7                                  | Non irradiated vs. margin from -5 to 20 mm | 7.725           | No           | ns              |     |     |
| 8                                  | Non irradiated vs. margin from 22 to 47 mm | 10.41           | No           | ns              |     |     |
| 9                                  |                                            |                 |              |                 |     |     |
| 10                                 |                                            |                 |              |                 |     |     |
| 11                                 | Test details                               | Mean rank 1     | Mean rank 2  | Mean rank diff. | n1  | n2  |
| 12                                 |                                            |                 |              |                 |     |     |
| 13                                 | Non irradiated vs. margin from -5 to 20 mm | 174.9           | 167.1        | 7.725           | 126 | 81  |
| 14                                 | Non irradiated vs. margin from 22 to 47 mm | 174.9           | 164.5        | 10.41           | 126 | 130 |
