# Supplementary material for: The out-of-field dose in radiation therapy induces delayed tumorigenesis by senescence evasion
Source: eLife. 2022 Mar 18;11:e67190. doi: 10.7554/eLife.67190 (PMC8933005; doi:10.7554/eLife.67190)
Supplement: Figure 1—figure supplement 1—source data 1. [file elife-67190-fig1-figsupp1-data1.xlsx]

## Sheet: rendements en profondeur clinac
Figure 1-Figure supplement 1-source data 1
Rendement en profondeur du Clinac du Centre Oscar Lambret
Maxime Tomezak et Thomas Lacornerie
BEGIN_SCAN_DATA
	FORMAT=CC-Export	V1,9
	FILE_CREATION_DATE=11-May-2015	19:25:39
	LAST_MODIFIED=11-May-2015	19:25:39
	BEGIN_SCAN	1
	TASK_NAME=tba	PDD	Profiles
	PROGRAM=tbaScan
	MEAS_DATE=11-May-2015	19:23:34
	LINAC=CLINAC	2
	MODALITY=X
	ISOCENTER=1000,00
	INPLANE_AXIS=Y
	CROSSPLANE_AXIS=X
	DEPTH_AXIS=Depth
	INPLANE_AXIS_DIR=GUN_TARGET
	CROSSPLANE_AXIS_DIR=LEFT_RIGHT
	DEPTH_AXIS_DIR=UP_DOWN
	ENERGY=20,00
	NOMINAL_DMAX=32,30
	SSD=1000,00
	SCD=450,00
	BLOCK=0
	WEDGE_ANGLE=0,00
	FIELD_INPLANE=100,00
	FIELD_CROSSPLANE=100,00
	FIELD_TYPE=RECTANGULAR
	GANTRY=0,00
	GANTRY_UPRIGHT_POSITION=0
	GANTRY_ROTATION=CW
	COLL_ANGLE=0,00
	COLL_OFFSET_INPLANE=0,00
	COLL_OFFSET_CROSSPLANE=0,00
	SCAN_DEVICE=MP3
	SCAN_DEVICE_SETUP=BARA_LEFT_RIGHT
	ELECTROMETER=TANDEM
	RANGE_FIELD=AUTO
	RANGE_REFERENCE=AUTO
	DETECTOR=THIMBLE_CHAMBER
	DETECTOR_SUBCODE=SEMIFLEX
	DETECTOR_RADIUS=2,75
	DETECTOR_NAME=PTW	31010	Semiflex
	DETECTOR_SN=801
	DETECTOR_CALIBRATION=293100000,00
	DETECTOR_IS_CALIBRATED=1
	DETECTOR_REFERENCE=THIMBLE_CHAMBER
	DETECTOR_REFERENCE_SUBCODE=SEMIFLEX
	DETECTOR_REFERENCE_RADIUS=2,75
	DETECTOR_REFERENCE_NAME=PTW	31013	Semiflex
	DETECTOR_REFERENCE_SN=1443
	DETECTOR_REFERENCE_IS_CALIBRATED=1
	DETECTOR_REFERENCE_CALIBRATION=93960000,00
	REF_FIELD_DEPTH=0,00
	REF_FIELD_DEFINED=ISOCENTER
	REF_FIELD_INPLANE=100,00
	REF_FIELD_CROSSPLANE=100,00
	REF_SCAN_POSITIONS=0,00;1,50;3,00;4,50;6,00;7,50;9,00;10,50;12,00;13,50;15,00;16,50;18,00;19,50;21,00;22,50;24,00;25,50;27,00;28,50;30,00;31,50;33,00;34,50;35,00;37,50;40,00;42,50;45,00;47,50;50,00;52,50;55,00;57,50;60,00;62,50;65,00;67,50;70,00;72,50;75,00;80,00;85,00;90,00;95,00;100,00;105,00;110,00;115,00;120,00;125,00;130,00;135,00;140,00;145,00;150,00;155,00;160,00;165,00;170,00;175,00;180,0…
	SCAN_CURVETYPE=PDD
	SCAN_OFFAXIS_INPLANE=0,00
	SCAN_OFFAXIS_CROSSPLANE=0,00
	SCAN_ANGLE=0,00
	SCAN_DIAGONAL=NOT_DIAGONAL
	SCAN_DIRECTION=NEGATIVE
	MEAS_MEDIUM=WATER
	MEAS_PRESET=REFERENCE_DOSEMETER
	MEAS_TIME=0,200
	MEAS_UNIT=A,U,
	SCAN_SPEEDS=20,00;	8,00;40,00;	25,00;100,00;	40,00;400,00;	50,00;
	DELAY_TIMES=20,00;	0,000;150,00;	0,000;400,00;	0,000;
	PRESSURE=1013,20
	TEMPERATURE=20,00
	NORM_TEMPERATURE=20,00
	CORRECTION_FACTOR=1,0000
	EXPECTED_MAX_DOSE_RATE=3,00
	BEGIN_DATA
	0	1.4119	1.8367	34.7759	56.1682				0	34.7759	56.1682
	1.5	1.6083	1.995	39.6133	61.0092				1.5	39.6133	61.0092
	3	2.0843	2.2804	51.3374	69.737				3	51.3374	69.737
	4.5	2.5023	2.5405	61.633	77.6911				4.5	61.633	77.6911
	6	2.8017	2.7457	69.0074	83.9664				6	69.0074	83.9664
	7.5	3.0087	2.9092	74.1059	88.9664				7.5	74.1059	88.9664
	9	3.141	3.012	77.3645	92.1101				9	77.3645	92.1101
	10.5	3.29	3.0931	81.0345	94.5902				10.5	81.0345	94.5902
	12	3.4179	3.157	84.1847	96.5443				12	84.1847	96.5443
	13.5	3.5301	3.2002	86.9483	97.8654				13.5	86.9483	97.8654
	15	3.6457	3.2245	89.7956	98.6086				15	89.7956	98.6086
	16.5	3.7471	3.2398	92.2931	99.0765				16.5	92.2931	99.0765
	18	3.8278	3.2624	94.2808	99.7676				18	94.2808	99.7676
	19.5	3.8806	3.2698	95.5813	99.9939				19.5	95.5813	99.9939
	21	3.9298	3.2676	96.7931	99.9266				21	96.7931	99.9266
	22.5	3.9675	3.2658	97.7217	99.8716				22.5	97.7217	99.8716
	24	3.9973	3.2586	98.4557	99.6514				24	98.4557	99.6514
	25.5	4.0155	3.2549	98.9039	99.5382				25.5	98.9039	99.5382
	27	4.0406	3.2338	99.5222	98.893				27	99.5222	98.893
	28.5	4.0514	3.2322	99.7882	98.844				28.5	99.7882	98.844
	30	4.0543	3.2153	99.8596	98.3272				30	99.8596	98.3272
	31.5	4.0608	3.1889	100.02	97.5199				31.5	100.02	97.5199
	33	4.0617	3.1513	100.042	96.37				33	100.042	96.37
	34.5	4.0649	3.1213	100.121	95.4526				34.5	100.121	95.4526
	35	4.0512	3.0837	99.7833	94.3028				35	99.7833	94.3028
	37.5	4.0488	3.0536	99.7241	93.3823				37.5	99.7241	93.3823
	40	4.0348	3.0161	99.3793	92.2355				40	99.3793	92.2355
	42.5	4.0155	2.9822	98.9039	91.1988				42.5	98.9039	91.1988
	45	3.9975	2.9372	98.4606	89.8226				45	98.4606	89.8226
	47.5	3.9654	2.9127	97.67	89.0734				47.5	97.67	89.0734
	50	3.9346	2.8756	96.9113	87.9388				50	96.9113	87.9388
	52.5	3.9053	2.8413	96.1897	86.8899				52.5	96.1897	86.8899
	55	3.8855	2.8129	95.702	86.0214				55	95.702	86.0214
	57.5	3.8489	2.7793	94.8005	84.9939				57.5	94.8005	84.9939
	60	3.8115	2.7398	93.8793	83.7859				60	93.8793	83.7859
	62.5	3.7829	2.7039	93.1749	82.6881				62.5	93.1749	82.6881
	65	3.7544	2.6681	92.4729	81.5933				65	92.4729	81.5933
	67.5	3.7183	2.6061	91.5837	79.6972				67.5	91.5837	79.6972
	70	3.6818	2.5369	90.6847	77.581				70	90.6847	77.581
	72.5	3.6445	2.4734	89.766	75.6391				72.5	89.766	75.6391
	75	3.6121	2.4087	88.968	73.6606				75	88.968	73.6606
	80	3.5493	2.3504	87.4212	71.8777				80	87.4212	71.8777
	85	3.4727	2.2883	85.5345	69.9786				85	85.5345	69.9786
	90	3.4141	2.2257	84.0911	68.0642				90	84.0911	68.0642
	95	3.3429	2.161	82.3374	66.0856				95	82.3374	66.0856
	100	3.2827	2.109	80.8547	64.4954				100	80.8547	64.4954
	105	3.2132	2.0477	79.1429	62.6208				105	79.1429	62.6208
	110	3.1505	2	77.5985	61.1621				110	77.5985	61.1621
	115	3.088	1.9438	76.0591	59.4434				115	76.0591	59.4434
	120	3.0328	1.8923	74.6995	57.8685				120	74.6995	57.8685
	125	2.9682	1.8427	73.1084	56.3517				125	73.1084	56.3517
	130	2.9129	1.7901	71.7463	54.7431				130	71.7463	54.7431
	135	2.8537	1.7447	70.2882	53.3547				135	70.2882	53.3547
	140	2.799	1.6949	68.9409	51.8318				140	68.9409	51.8318
	145	2.7448	1.6472	67.6059	50.3731				145	67.6059	50.3731
	150	2.6851	1.6032	66.1355	49.0275				150	66.1355	49.0275
	155	2.6332	1.5625	64.8571	47.7829				155	64.8571	47.7829
	160	2.5783	1.5161	63.5049	46.3639				160	63.5049	46.3639
	165	2.5294	1.4757	62.3005	45.1284				165	62.3005	45.1284
	170	2.4853	1.434	61.2143	43.8532				170	61.2143	43.8532
	175	2.4342	1.3968	59.9557	42.7156				175	59.9557	42.7156
	180	2.3835	1.3534	58.7069	41.3884				180	58.7069	41.3884
	185	2.3375	1.3159	57.5739	40.2416				185	57.5739	40.2416
	190	2.2917	1.2814	56.4458	39.1865				190	56.4458	39.1865
	195	2.2438	1.2444	55.266	38.055				195	55.266	38.055
	200	2.2033	1.2103	54.2685	37.0122				200	54.2685	37.0122
	205	2.1582	1.1783	53.1576	36.0336				205	53.1576	36.0336
	210	2.1126	1.1447	52.0345	35.0061				210	52.0345	35.0061
	215	2.0723	1.1123	51.0419	34.0153				215	51.0419	34.0153
	220	2.0328	1.083	50.069	33.1193				220	50.069	33.1193
	225	1.9899	1.0546	49.0123	32.2508				225	49.0123	32.2508
	230	1.9558	1.0209	48.1724	31.2202				230	48.1724	31.2202
	235	1.9157	0.9923	47.1847	30.3456				235	47.1847	30.3456
	240	1.8793	0.96709	46.2882	29.5746				240	46.2882	29.5746
	245	1.8434	0.93883	45.4039	28.7104				245	45.4039	28.7104
	250	1.8074	0.9182	44.5172	28.0795				250	44.5172	28.0795
	255	1.7737	0.89024	43.6872	27.2245				255	43.6872	27.2245
	260	1.7347	0.86609	42.7266	26.4859				260	42.7266	26.4859
	265	1.7007	0.84456	41.8892	25.8275				265	41.8892	25.8275
	270	1.6686	0.82072	41.0985	25.0985				270	41.0985	25.0985
	275	1.6362	0.79708	40.3005	24.3755				275	40.3005	24.3755
	280	1.6056	0.77779	39.5468	23.7856				280	39.5468	23.7856
	285	1.5761	0.75926	38.8202	23.219				285	38.8202	23.219
	290	1.5443	0.73694	38.0369	22.5364				290	38.0369	22.5364
	295	1.5141	0.71515	37.2931	21.87				295	37.2931	21.87
	300	1.4877	0.738	36.6429	22.5688				300	36.6429	22.5688
	END_DATA
	END_SCAN	1
END_SCAN_DATA
