# Supplementary material for: The out-of-field dose in radiation therapy induces delayed tumorigenesis by senescence evasion
Source: eLife. 2022 Mar 18;11:e67190. doi: 10.7554/eLife.67190 (PMC8933005; doi:10.7554/eLife.67190)
Supplement: Figure 1—figure supplement 3—source data 1. [file elife-67190-fig1-figsupp3-data1.xlsx]

## Sheet: F1MC
				Figure 1-Figure supplement 3-source data 1
Date	Condiction		Days	n° Irradiation	number in 1 ml	n°in 1 well(2ml)	split in n°/1well:	n° wells new culture	n° counted/n°at beginning culture (for 1 well)	Db new	Doubling tot
2015-07-18	all -starting culture		0	0		35000					26.3
2015-07-20			2	1
2015-07-21	ctrl	home	3		80000	160000	28000	4	4.57143	2.19265	28.4926
		voyages			80000	160000	35000	4	4.57143	2.19265	28.4926
	irradiated	umbra		2	98666.7	197333	35000	6	5.6381	2.49521	28.7952
		penumbra		2	77333.3	154667	35000	6	4.41905	2.14374	28.4437
		field		2	86333.3	172667	35000	6	4.93333	2.30256	28.6026
2015-07-22			4	3
2015-07-23			5	4												tabella del grafico						rispetto al ctrl travel			tabella relativa delle diminuzioni rispetto al ctrl travel
2015-07-24	ctrl	home	6		76000	152000	40000	4	5.42857	2.44057	30.9332			Day	CTRL home	CTRL	Margin (+28 to +63mm)	Margin (-13 to +22mm)	PTV		%umbra (rispetto &al ctrl travel)	%penumbra	% field	giorni		CTRL home	CTRL travel	Distal umbra	Penumbra +proximal umbra	Field
		voyages			85000	170000	40000	4	4.85714	2.28011	30.7728			0	26.3	26.3	26.3	26.3	26.3					0		0	0	0	0	0
	irradiated	umbra		5	46333.3	92666.7	40000	6	2.64762	1.4047	30.1999			3	28.4898	28.4898	28.772	28.4347	28.5982					1
		penumbra		5	28666.7	57333.3	40000	6	1.6381	0.712019	29.1558			6	30.9284	30.7405	30.1695	29.1443	28.1246					2
		field		5	12666.7	25333.3	40000	3	0.72381	-0.466318	28.1362			9	33.0674	32.2222	31.546	29.9453	27.8305		100.99	99.8066	99.3958	3		2.18982	2.18982	2.47201	2.13472	2.29817
2015-07-27	ctrl	home	9		88500	177000	40000	4	4.425	2.14568	33.0789			12	35.0377	34.0495	32.9729	30.6449	26.925	decrease		0.193402	0.604199		d			-0.28219	0.0550998	-0.10835
		voyages			56000	112000	40000	4	2.8	1.48543	32.2582			18	37.8748	36.7542	35.5192	31.4644	26.4629						% decrease			-12.8864	2.51618	-4.94789
	irradiated	umbra		6	52333.3	104667	40000	6	2.61667	1.38773	31.5876			23	39.8535	38.6466	37.4804	32.7266	26.0018		98.1427	94.8074	91.4905	6		4.62839	4.44048	3.86955	2.84425	1.82463
		penumbra		6	35500	71000	40000	6	1.775	0.827819	29.9836									decrease	1.85728	5.1926	8.50947		d(rispetto al ctrl travel)			0.570937	1.59623	2.61585
		field		6	16300	32600	40000	2	0.815	-0.295128	27.8411								-0.473541						% decrease			12.8575	35.9472	58.9092	dopo la prima settimana
2015-07-28			10	7												1.41018	0.927988	0.565278	0.720195		97.9013	92.9336	86.3706	9		6.76739	5.92222	5.24596	3.64528	1.53053
2015-07-29			11	8												2.6577	1.90262	1.47967		decrease	2.09875	7.06635	13.6294		d			0.676264	2.27694	4.39169
2015-07-30	ctrl	home	12		78500	157000	30000	4	3.925	1.97269	35.0516														% decrease			11.4191	38.4473	74.1562
		voyages			71000	142000	30000	4	3.55	1.82782	34.086										96.8384	90.0012	79.0763	12		8.7377	7.74947	6.67294	4.34493	0.625046
																				dcrease	3.16165	9.99881	20.9237		d			1.07652	3.40454	7.12442
																									% decrease			13.8916	43.9326	91.9343
	irradiated	umbra		9	54500	109000	30000	6	2.725	1.44626	33.0339										96.6399	85.6077	71.9997	18		11.5748	10.4542	9.21922	5.16441	0.16289
																				decrease	3.36008	14.3923	28.0003		d			1.23497	5.28978	10.2913
																									% decrease			11.8132	50.5996	98.4419
		penumbra		9	32666.7	65333.3	30000	6	1.63333	0.707819	30.6914										96.9825	84.6818	67.281	23		13.5535	12.3466	11.1804	6.42661	-0.29822
		field		9	10750	21500	40000	1	0.5375	-0.895663	26.9455									decrease	3.01748	15.3182	32.719		d			1.16615	5.91995	12.6448
2015-08-05	ctrl	home	18		215000	215000	35000	6	7.16667	2.8413	37.8929														% decrease			9.44517	47.9482	102.415
		voyages			196667	196667	35000	6	6.55556	2.71272	36.7987
	irradiated	umbra		13	176667	176667	35000	2	5.88889	2.558	35.5919
		penumbra		13	53000	53000	50000	2	1.76667	0.82103	31.5124
		field		13	29333.3	29333.3	30000	1	0.733333	-0.447459	26.498
2015-08-10	ctrl	home	23		138333	138333			3.95238	1.98272	39.8756
		voyages			130000	130000			3.71429	1.89308	38.6918														al giorno 13 finisce seconda settimana
	irradiated	umbra		15	136667	136667			3.90476	1.96523	37.5571												secondo l'equazione		ctrl travell	umbra	penumbra	field
		penumbra		15	120000	120000			2.4	1.26303	32.7755													DBs(5day)	29.9015	29.7035
		field		15	22000	22000			0.733333	-0.447459	26.0505													day 8	31.8038	31.2842
																									1.9023	1.5807
																									3.73809	2.99115		0.707107
																								day10	32.974	32.229
																									1.1702	0.9448	0.8	-1
																									2.25043	1.92492	1.7411	0.5
																									al giorno 20 finisce terza settimana
																									ctrl travell	umbra	penumbra	field
																								DBs(20day)	37.649	36.545
																									0.435275
																											0.5
																									5.65685
DS			in plate		DPs new	DPs tot	DS	DPs tot media
day 23	ctrl H		125000	3.57143	1.8365	39.7113			ctrl H	ctrl V	umbra	penumbra	field
			150000	4.28571	2.09954	39.9744			39.8535	38.6466	37.4804	32.7266	26.0018					tabella calcolata dalla media del numero di cellule						tabella del grafico calcolata dalla media dei Dbs
			140000	4	2	39.8748		39.8535	pvalue	day 23						giorni	CTRL home	CTRL voyages	umbra	penumbra	field	giorni	CTRL home	CTRL travel	Distal umbra	Proximal umbra + penumbra	Field
		media	138333			DS	0.132807		ctrl+ctrl	ctrl v-umbra	ctrl v-penumbra	ctrl v-field				0	26.3	26.3	26.3	26.3	26.3	0	26.3	26.3	26.3	26.3	26.3
	ctrl V		130000	3.71429	1.89308	38.6473			0.0012681	0.00135306	2.67954e-08	6.18196e-05				1						1
			135000	3.85714	1.94753	38.7017			**	**	***	***				2						2
			125000	3.57143	1.8365	38.5907		38.6466	repeated p-value							3	28.4926	28.4926	28.7952	28.4437	28.6026	3	28.4898	28.4898	28.772	28.4347	28.5982
		media	130000			DS	0.0555191		ctrl+ctrl	ctrl v-umbra	ctrl v-penumbra	ctrl v-field				4						4
	UMBRA		150000	4.28571	2.09954	37.6188			0.0012681	0.00135306	2.67954e-08	6.18196e-05				5						5
			125000	3.57143	1.8365	37.3557										6	30.9332	30.7728	30.1999	29.1558	28.1362	6	30.9284	30.7405	30.1695	29.1443	28.1246
			135000	3.85714	1.94753	37.4668		37.4804								7						7
		media	136667			DS	0.132048									8						8
	PENUMBRA		125000	2.5	1.32193	32.7863										9	33.0789	32.2582	31.5876	29.9836	27.8411	9	33.0674	32.2222	31.546	29.9453	27.8305
			115000	2.3	1.20163	32.666										10						10
			120000	2.4	1.26303	32.7274		32.7266								11						11
		media	120000			DS	0.0601515									12	35.0516	34.086	33.0339	30.6914	26.9455	12	35.0377	34.0495	32.9729	30.6449	26.925
	FIELD		25000	0.833333	-0.263034	26.1999										18	37.8929	36.7987	35.5919	31.5124	26.498	18	37.8748	36.7542	35.5192	31.4644	26.4629
			18000	0.6	-0.736966	25.7259										23	39.8756	38.6918	37.5571	32.7755	26.0505	23	39.8535	38.6466	37.4804	32.7266	26.0018
			23000	0.766667	-0.383329	26.0796		26.0018
		media	22000			DS	0.246354
day 18	ctrl H	195000		6.5	2.70044	37.7381										Deviazioni standard
		235000		7.83333	2.96963	38.0073										ctrl HOME		ctrl Voyage	umbra	penumbra	field
		215000		7.16667	2.8413	37.879		37.8748	ctrl H	ctrl V	umbra	penumbra	field			day
	media	215000				DS	0.134642		37.8748	36.7542	35.5192	31.4644	26.4629			0	0	0	0	0	0
	ctrl V	225000		7.5	2.90689	36.9564			pvalue	day 18						3	0.127684	0.127684	0.324222	0.196512	0.136692
		175000		5.83333	2.54432	36.5938			ctrl+ctrl	ctrl v-umbra	ctrl v-penumbra	ctrl v-field				6	0.107482	0.413631	0.174161	0.103311	0.178216
		190000		6.33333	2.66297	36.7124		36.7542	0.00155702	0.0021207	4.86778e-05	1.6467e-06				9	0.196565	0.145983	0.220587	0.334114	0.0907996
	media	196667				DS	0.184857		**	**	***	***				12	0.117087	0.0574879	0.283972	0.188283	0.23832
	UMBRA	175000		5.83333	2.54432	35.5173			repeated p-value							18	0.134642	0.184857	0.225337	0.0817603	0.254542
		150000		5	2.32193	35.2949			ctrl+ctrl	ctrl v-umbra	ctrl v-penumbra	ctrl v-field				23	0.132807	0.0555191	0.132048	0.0601515	0.246354
		205000		6.83333	2.77259	35.7455		35.5192	0.00155702	0.0021207	4.86778e-05	1.6467e-06
	media	176667				DS	0.225337		pvalue
	PENUMBRA	56000		1.86667	0.900464	31.5454			umbra-penumbra	field-umbra	field-penumbra
		50000		1.66667	0.736966	31.3819			0.000295028	1.54799e-06	0.000307492
		53000		1.76667	0.82103	31.466		31.4644	***	***	***
	media	53000				DS	0.0817603
	FIELD	34000		0.85	-0.234465	26.6906
		24000		0.6	-0.736966	26.1881
		30000		0.75	-0.415037	26.51		26.4629
	media	29333.3				DS	0.254542
day 12									ctrl H	ctrl V	umbra	penumbra	field
	ctrl H	148000		3.7	1.88753	34.9549			35.0377	34.0495	32.9729	30.6449	26.925
		166000		4.15	2.05311	35.1205		35.0377	pvalue	day 12
	media	157000							ctrl+ctrl	ctrl v-umbra	ctrl v-penumbra	ctrl v-field
						DS	0.117087		0.0232589	0.0178639	0.000307279	0.0103373
	ctrl V	146000		3.65	1.8679	34.0901			*	*	***	**
		138000		3.45	1.7866	34.0088		34.0495	repeated p-value
	media	142000				DS	0.0574879		ctrl+ctrl	ctrl v-umbra	ctrl v-penumbra	ctrl v-field
									0.0232589	0.0178639	0.000307279	0.0103373
	UMBRA	96000		2.4	1.26303	32.809
		96000		2.4	1.26303	32.809
		135000		3.375	1.75489	33.3008		32.9729
	media	109000				DS	0.283972
	PENUMBRA	74000		1.85	0.887525	30.8328
		65000		1.625	0.70044	30.6457
		57000		1.425	0.510962	30.4562		30.6449
	media	65333.3				DS	0.188283
	FIELD	19000		0.475	-1.074	26.7565
		24000		0.6	-0.736966	27.0936		26.925
	media	21500				DS	0.23832
day 9	ctrl H	194000		4.85	2.27798	33.2064			ctrl H	ctrl V	umbra	penumbra	field
		160000		4	2	32.9284			33.0674	32.2222	31.546	29.9453	27.8305
	media	177000				DS	0.196565	33.0674	pvalue	day 9
									ctrl+ctrl	ctrl v-umbra	ctrl v-penumbra	ctrl v-field
	ctrl V	104000		2.6	1.37851	32.119			0.0462163	0.0267303	0.00238518	0.00292098
		120000		3	1.58496	32.3254			*	*	**	**
	media	112000				DS	0.145983	32.2222	repeated p-value
									0.0462163	0.0267303	0.00238518	0.00292098
	UMBRA	102000		2.55	1.3505	31.52
		122000		3.05	1.60881	31.7784
		90000		2.25	1.16993	31.3395		31.546
	media	157000				DS	0.220587
	PENUMBRA	62000		1.55	0.632268	29.7765
		60000		1.5	0.584963	29.7292
		91000		2.275	1.18587	30.3301		29.9453
	media	106500				DS	0.334114
	FIELD	31000		0.775	-0.367732	27.7569
		32000		0.8	-0.321928	27.8027
		35000		0.875	-0.192645	27.932		27.8305
	media	49000				DS	0.0907996
day 6	ctrl H	144000		5.14286	2.36257	30.8524			ctrl H	ctrl V	umbra	penumbra	field
		160000		5.71429	2.51457	31.0044		30.9284	30.9284	30.7405	30.1695	29.1443	28.1246
	media	152000				DS	0.107482		p-value	day6		repeated p value t test
									ctrl-ctrl	ctrl V-umbra	ctrl H-umbra	ctrl-ctrl	ctrl V-umbra
	ctrl V	136000		3.88571	1.95818	30.448			0.635575	0.277043	0.00929246	0.635575	0.277043
		204000		5.82857	2.54314	31.033		30.7405		ctrl V-penumbra	ctrl H-penumbra		ctrl V-penumbra
	media	170000				DS	0.413631			0.103922	0.00188777		0.103922
										p tra ctrl v e field	ctrlH-field		p tra ctrl v e field
	UMBRA	86000		2.45714	1.29698	30.069			*	0.046753	0.000210257		0.046753
		86000		2.45714	1.29698	30.069
		106000		3.02857	1.59864	30.3706		30.1695
	media	92666.7				DS	0.174161		pvalue penumbra et umbra
	PENUMBRA	54000		1.54286	0.625604	29.0603			0.00226554
		62000		1.77143	0.824913	29.2596			pvalue penumbra et field
		56000		1.6	0.678072	29.1128		29.1443	0.00257037
	media	57333.3				DS	0.103311
	FIELD	28000		0.8	-0.321928	28.2762
		22000		0.628571	-0.669851	27.9283
		26000		0.742857	-0.428843	28.1693		28.1246
	media	25333.3				DS	0.178216
day 3	ctrl H	150000		4.28571	2.09954	28.3995			ctrl H	ctrl V	umbra	penumbra	field
		170000		4.85714	2.28011	28.5801		28.4898	28.4898	28.4898	28.772	28.4347	28.5982
	media	160000				DS	0.127684
	ctrl V	150000		4.28571	2.09954	28.3995			p-value	day 3
		170000		4.85714	2.28011	28.5801		28.4898	ctrl-ctrl	ctrl V-umbra
	media	160000				DS	0.127684		1	0.275445
										ctrl V-penumbra
	UMBRA	150000		4.28571	2.09954	28.3995				0.729559
		226000		6.45714	2.6909	28.9909				p tra ctrl v e field
		216000		6.17143	2.6256	28.9256		28.772		0.447323
	media	197333				DS	0.324222
	PENUMBRA	150000		4.28571	2.09954	28.3995
		178000		5.08571	2.34645	28.6465
		136000		3.88571	1.95818	28.2582		28.4347
	media	154667				DS	0.196512
						DPs tot
	FIELD	162000		4.62857	2.21057	28.5106
		192000		5.48571	2.45568	28.7557
		164000		4.68571	2.22827	28.5283		28.5982
						DS	0.136692
	media	172667		4.93333	2.30256	28.6026
