# Supplementary material for: The out-of-field dose in radiation therapy induces delayed tumorigenesis by senescence evasion
Source: eLife. 2022 Mar 18;11:e67190. doi: 10.7554/eLife.67190 (PMC8933005; doi:10.7554/eLife.67190)
Supplement: Figure 1—figure supplement 4—source data 1. [file elife-67190-fig1-figsupp4-data1.xlsx]

## Sheet: MDA
Figure 1-Figure supplement 4-source data 1
						DS apo	DS death				Non-irradiated	PTV		Non-irradiated	PTV		Non-irradiated	PTV		Non-irradiated	PTV
										0	3.06667	2.4		2.83333	5.1		1.4	10.3667		2.06667	15.2	0
			Ctrl	Irradiated		0	0			0	5.36667	6.93333		4.96667	9.33333		3.13333	11		3.23333	15.1667	0
	after 2 irr	apoptosis	3.06667	2.4	ctrl	0.378594	0.321455
		other cell deaths	5.36667	6.93333	ir	2.02237	2.93655													DS apo	DS necrosi
		living cells																		0	0
																				0.378594	0.321455
	after 4 irr	apo	2.83333	5.1	ctrl	1.05987	1.51767													2.02237	2.93655
		morte	4.96667	9.33333	ir	1.41774	2.13854
		living																		1.05987	1.51767
																				1.41774	2.13854
	after 6 irr	apo	1.4	10.3667	ctrl	0.556776	0.61101
	24h later	morte	3.13333	11	ir	2.85015	1.80278													0.556776	0.61101
		living																		2.85015	1.80278
	after 6 irr	apo	2.06667	15.2	ctrl	0.23094	0.61101													0.23094	0.61101
	4days later	morte	3.23333	15.1667	ir	3.13209	1.87705													3.13209	1.87705
		living				0	0													0	0

## Sheet: Fibro (2)
											Non-irradiated	PTV	Margin -8 to +27mm	Margin +27 to +62mm		Non-irradiated	PTV	Margin -8 to +27mm	Margin +27 to +62mm		Non-irradiated	PTV	Margin -8 to +27mm	Margin +27 to +62mm		Non-irradiated	PTV	Margin -8 to +27mm	Margin +27 to +62mm
							DS apo	DS death	0	0	2.1	2.1	1.6	2.2		4.7	2.5	1.93333	3.76667		2.36667	7.2	4.23333	2.3		2	4.73333	2.53333	1.43333	0
									0	0	5.7	3.9	6.2	7.7		6.3	4.7	3.9	4.7		4.8	6.63333	6.83333	6.56667		6.2	7.7	7	4.56667	0
		Ctrl	Distal umbra	Proximal Umbra + Penumbra	Field
after 2 irr	apoptosis	2.1	2.2	1.6	2.1	ctrl	0.6	1.08167																		DS apo	DS death
	Non-apoptotic cell death	5.7	7.7	6.2	3.9	distal umbra	0.1	1.8735																		0	0
	living cells	92.2	90.1	92.2	94	proximal umbra	0.4	0.8544																		0.6	1.08167
						field	0.360555	0.173205																		0.1	1.8735
after 4 irr	apo	4.7	3.76667	1.93333	2.5	ctrl	2.81603	1.80278																		0.4	0.8544
	morte	6.3	4.7	3.9	4.7	distal umbra	1.85831	0.360555																		0.360555	0.173205
	living	89	91.5333	94.1667	92.8	proximal umbra	0.814453	0.866025
						field	0.264575	0.1																		2.81603	1.80278
after 6 irr	apo	2.36667	2.3	4.23333	7.2	ctrl	0.493288	0.916515																		1.85831	0.360555
24h later	morte	4.8	6.56667	6.83333	6.63333	distal umbra	0.360555	0.152753																		0.814453	0.866025
	living					proximal umbra	0.61101	0.23094																		0.264575	0.1
						field	0.52915	1.06927
after 6 irr	apo	2	1.43333	2.53333	4.73333	ctrl	0.7	1.11355																		0.493288	0.916515
4days later	morte	6.2	4.56667	7	7.7	distal umbra	0.378594	0.550757																		0.360555	0.152753
	living					proximal umbra	0.208167	2.12838																		0.61101	0.23094
						field	0.702377	1.53948																		0.52915	1.06927
																										0.7	1.11355
																										0.378594	0.550757
																										0.208167	2.12838
																										0.702377	1.53948
																										0	0
