# Supplementary material for: The out-of-field dose in radiation therapy induces delayed tumorigenesis by senescence evasion
Source: eLife. 2022 Mar 18;11:e67190. doi: 10.7554/eLife.67190 (PMC8933005; doi:10.7554/eLife.67190)
Supplement: Figure 1—figure supplement 4—source data 2. [file elife-67190-fig1-figsupp4-data2.xlsx]

## Sheet:  F6MC1 mars 2016 (2)
Figure 1-Figure supplement 4-source data 2
N irradiazioni	condition	hours later the last irradiation		% An V +		media	DS	p-value	Signicative?										DS
2		12																	0
												% Annexine v positive		Ctrl	Distal umbra	Proximal Umbra + Penumbra	Field	Non irradiated	2.92062
	ctrl 1			7.2		6.8	2.92062					after 2 irradiations		6.8	6.06667	6.9	8.36667	Margin (+27 to +62mm)	1.58219
	ctrl 2			9.5								12h later						Margin (-8 to +27mm)	0.953939
	ctrl 3			3.7								after 4 Irradiations		7.96667	6.96667	5.76667	5.63333	PTV	0.404145
	umbra1			4.7		6.06667	1.58219	0.727031	NS			12h later
	umbra2			7.8								after 6 irradiations		6.23333	6.3	9.06667	11.7	Non irradiated	2.63502
	umbra3			5.7								12 h later						Margin (+27 to +62mm)	2.31157
	penumbra1			6.8		6.9	0.953939	0.95936	NS			after		6.7	7.7	9.42	14.3333	Margin (-8 to +27mm)	0.802081
	penumbra2			6								after 6 irradiations						PTV	1.16762
	penumbra3			7.9								4 days later
	field 1			7.9		8.36667	0.404145	0.451464	NS									Non irradiated	1.2741
	field 2			8.6														Margin (+27 to +62mm)	0.72111
	field 3			8.6														Margin (-8 to +27mm)	1.38684
																		PTV	4.21426
																		Non irradiated	1.73494
																		Margin (+27 to +62mm)	0.8544
																		Margin (-8 to +27mm)	0.655744
																		PTV	6.07152
4		12
	ctrl 1			5.8		7.96667	2.63502
	ctrl 2			7.2
	ctrl 3			10.9									Non irradiated	Margin (+27 to +62mm)	Margin (-8 to +27mm)	PTV		Non irradiated	Margin (+27 to +62 mm)	Margin (-8 to +27mm)	PTV		Non irradiated	Margin (+27 to +62mm)	Margin (-8 to +27mm)	PTV		Non irradiated	Margin (+27 to +62mm)	Margin (-8 to +27mm)	PTV
	umbra1			9.4		6.96667	2.31157	0.647534	NS		% of Annexin V-positive cells	0	6.8	6.06667	6.9	8.36667		7.96667	6.96667	5.76667	5.63333		6.23333	6.3	9.06667	11.7		6.7	7.7	9.42	14.3333	0
	umbra2			4.8							media													13.4
	umbra3			6.7
	penumbra1			5.7		5.76667	0.802081	0.282531	NS
	penumbra2			6.6
	penumbra3			5
	field 1			4.6		5.63333	1.16762	0.262887	NS
	field 2			6.9
	field 3			5.4
6		12
	ctrl 1			5.6		6.23333	1.2741
	ctrl 2			7.7
	ctrl 3			5.4
	umbra1			5.7		6.3	0.72111	0.941863	NS
	umbra2			7.1
	umbra3			6.1
	penumbra1			10.6		9.06667	1.38684	0.0601086	NS
	penumbra2			8.7
	penumbra3			7.9
	field 1			16.1		11.7	4.21426	0.144616	NS
	field 2			11.3
	field 3			7.7
														With t*student test between ctrl data and the others: all are NON SIGNIFICATIVE
6		4 days
	ctrl 1			8.7		6.7	1.73494
	ctrl 2			5.8
	ctrl 3			5.6
	umbra1			7.8		7.7	0.8544	0.438169	NS
	umbra2			6.8
	umbra3			8.5
	penumbra1			8.7		9.42	0.655744	0.108202	NS
	penumbra2			9.2
	penumbra3			10
	field 1			7.4		14.3333	6.07152	0.15325	NS
	field 2			16.9
	field 3			18.7

## Sheet: MDA mars 2016
N irradiazioni	Medium	condition	hours later the last irradiation	% An V +		media	DS	p-values	Signifcative?
										DMEM (old medium)
2			12h							1		Non-irradiated	PTV		Non-irradiated	PTV		Non-irradiated	PTV		Non-irradiated	PTV
	DMEM (old one)	ctrl 1		4.5		5.6	1.1	0.750692	NS	% Annexin V	0	5.6	5.86667		6.16667	11.2		3.5	16.9		2.63333	38.8667	0
	DMEM (old one)	ctrl2		6.7						media
	DMEM (old one)	ctrl3		5.6
	DMEM (old one)	irr 1		6.5		5.86667	0.776745
	DMEM (old one)	irr2		6.1
	DMEM (old one)	irr3		5
4			12h
	DMEM (old one)	ctrl 1		8		6.16667	1.65025	0.036957	*
	DMEM (old one)	ctrl2		4.8
	DMEM (old one)	ctrl3		5.7
	DMEM (old one)	irr 1		10.3		11.2	1.27279
	DMEM (old one)	irr2		12.1
	DMEM (old one)	irr3		/
6			12h
	DMEM (old one)	ctrl 1		3.7		3.5	0.6245	0.0123569	*
	DMEM (old one)	ctrl2		2.8
	DMEM (old one)	ctrl3		4
	DMEM (old one)	irr 1		13.9		16.9	2.90517
	DMEM (old one)	irr2		19.7
	DMEM (old one)	irr3		17.1
6	DMEM (old one)	ctrl 1	4 days	2.4		2.63333	0.208167	0.014483	*
	DMEM (old one)	ctrl2		2.7
	DMEM (old one)	ctrl3		2.8						1
	DMEM (old one)	irr 1		46.5		38.8667	7.65005			DMEM	DS
	DMEM (old one)	irr2		31.2
	DMEM (old one)	irr3		38.9							0
										ctrl	1.1
										Irradiated	0.776745
										ctrl	1.65025
										Irradiated	1.27279
										ctrl	0.6245
										Irradiated	2.90517
										ctrl	0.208167
										Irradiated	7.65005
