# Supplementary material for: The out-of-field dose in radiation therapy induces delayed tumorigenesis by senescence evasion
Source: eLife. 2022 Mar 18;11:e67190. doi: 10.7554/eLife.67190 (PMC8933005; doi:10.7554/eLife.67190)
Supplement: Figure 1—source data 1. [file elife-67190-fig1-data1.xlsx]

## Sheet: Feuil1
Figure 1-source data 1
MDA-MB 231 (P43)	condition	count	plated at (cell count)	old PD	new PD			T test
2016-08-16	Non-irradiated	3000000	1000000	0	1.58496
2016-08-19	Non-irradiated	840000	240000	1.58496	3.39232
		830000	240000	1.58496	3.37504	3.38368	0.0122174				mean				SD
	PTV	2500000	1400000	1.58496	2.42146						Non-irradiated	PTV			Non-irradiated	PTV
		2650000	1400000	1.58496	2.50553	2.4635	0.0594424	0.00108378	**	0	1.58496	1.58496		2016-08-15	0	0
2016-08-22	Non-irradiated	2350000	480000	3.38368	5.67523					4	3.38368	2.4635		2016-08-19	0.0122174	0.0594424
		2100000	480000	3.38368	5.51296	5.5941	0.114743			7	5.5941	1.62321		2016-08-22	0.114743	0.142577
	PTV	575000	960000	2.4635	1.72402					10	6.16897	1.1277		2016-08-25	0.0142679	0.256376
		500000	960000	2.4635	1.52239	1.62321	0.142577	0.000530202	***	13	6.89458	-0.740782		2016-08-28	0.256376	0.185993
2016-08-25	Non-irradiated	720000	480000	5.5941	6.17906					17	8.02222	-3.07407		2016-08-31	0.0972297	0.256376
		710000	480000	5.5941	6.15888	6.16897	0.0142679
	PTV	140000	240000	1.72402	0.946416
		180000	240000	1.72402	1.30899	1.1277	0.256376	0.000647311	***
2016-08-28	Non-irradiated	450000	240000	6.16897	7.07586
		350000	240000	6.16897	6.71329	6.89458	0.256376
	PTV	30000	120000	1.1277	-0.872299
		60000	200000	1.1277	-0.609265	-0.740782	0.185993	0.000429653	***
2016-08-31	Non-irradiated	500000	240000	6.89458	7.95347
		550000	240000	6.89458	8.09097	8.02222	0.0972297
	PTV	7000	40000	-0.740782	-3.25536
		9000	40000	-0.740782	-2.89278	-3.07407	0.256376	0.000152581	***
