# Supplementary material for: The out-of-field dose in radiation therapy induces delayed tumorigenesis by senescence evasion
Source: eLife. 2022 Mar 18;11:e67190. doi: 10.7554/eLife.67190 (PMC8933005; doi:10.7554/eLife.67190)
Supplement: Figure 1—source data 2. [file elife-67190-fig1-data2.xlsx]

## Sheet: NHDF
	Figure 1-source data 2
jour	NHDF F6MC	condition	cell count	plated at (cell count) :	old PD	new PD	mean	SD	t-test/ni			Mean PD						SD PD
0	2016-08-15	Non-irradiated	3600000	800000	28.2	30.3699						Non-irradiated	PTV	Margin -8 to +27mm	Margin +27 to +62mm			Non-irradiated	PTV	Margin -8 to +27mm	Margin +27 to +62mm
4	2016-08-19	Non-irradiated	450000	240000	30.3699	31.2768					0	28.2	28.2	28.2	28.2	12 aout	0	0	0	0	0
			380000	240000	30.3699	31.0329	31.1549	0.172481			0	30.3699	30.3699	30.3699	30.3699	15 aout	0	0	0	0	0
		PTV	50000	120000	30.3699	29.1069					4	31.1549	29.4459	30.4939	31.1317	19 aout	4	0.172481	0.479469	0.175311	0.336893
			80000	120000	30.3699	29.785	29.4459	0.479469	0.0208461	*	7	31.7195	29.6773	31.0585	31.9888	22 aout	7	0.343249	0.599624	0.343249	0.0703823
		Margin -8 to +27mm	80000	80000	30.3699	30.3699					10	32.9157	29.259	31.4596	32.6527	25 aout	10	0.27741	0.136221	0.326926	0.38406
			95000	80000	30.3699	30.6179	30.4939	0.175311	0.0313878	*	13	33.6	29.2908	31.7056	33.4823	28 aout	13	0.198066	0.149556	0.107482	0.303833
		Margin +27 to +62mm	115000	80000	30.3699	30.8935					17	34.1407	28.1388	31.7409	34.1975	2016-09-01	17	0.145983	0	0.0373263	0.271054
			160000	80000	30.3699	31.3699	31.1317	0.336893	0.469478
7	2016-08-22	Non-irradiated	420000	240000	31.1549	31.9622
			300000	240000	31.1549	31.4768	31.7195	0.343249
		PTV	35000	40000	29.4459	29.2533
			63000	40000	29.4459	30.1013	29.6773	0.599624	0.0263714	*
		Margin -8 to +27mm	140000	80000	30.4939	31.3012
			100000	80000	30.4939	30.8158	31.0585	0.343249	0.0970069
		Margin +27 to +62mm	150000	80000	31.1317	32.0386
			140000	80000	31.1317	31.9391	31.9888	0.0703823	0.195284
10	2016-08-25	Non-irradiated	480000	240000	31.7195	32.7195
			420000	160000	31.7195	33.1118	32.9157	0.27741
		PTV	16000	20000	29.6773	29.3554
			14000	20000	29.6773	29.1627	29.259	0.136221	0.00177632	**
		Margin -8 to +27mm	90000	80000	31.0585	31.2285
			124000	80000	31.0585	31.6908	31.4596	0.326926	0.0203636	*
		Margin +27 to +62mm	105000	80000	31.9888	32.3811
			153000	80000	31.9888	32.9243	32.6527	0.38406	0.257369
13	2016-08-28	Non-irradiated	850000	480000	32.9157	33.7401
			700000	480000	32.9157	33.46	33.6	0.198066
		PTV	22000	20000	29.259	29.3965
			19000	20000	29.259	29.185	29.2908	0.149556	0.000827217	***
		Margin -8 to +27mm	200000	160000	31.4596	31.7816
			180000	160000	31.4596	31.6296	31.7056	0.107482	0.00350025	**
		Margin +27 to +62mm	330000	160000	32.6527	33.6971
			245000	160000	32.6527	33.2674	33.4823	0.303833	0.345595
17	2016-09-01	Non-irradiated	325000	240000	33.6	34.0374
			375000	240000	33.6	34.2439	34.1407	0.145983
		PTV	4500	10000	29.2908	28.1388
			4500	10000	29.2908	28.1388	28.1388	0	0.000147835	***
		Margin -8 to +27mm	83500	80000	31.7056	31.7673
			80500	80000	31.7056	31.7145	31.7409	0.0373263	0.00098275	***
		Margin +27 to +62mm	150000	80000	33.4823	34.3892
			115000	80000	33.4823	34.0058	34.1975	0.271054	0.409225
