# Supplementary material for: The out-of-field dose in radiation therapy induces delayed tumorigenesis by senescence evasion
Source: eLife. 2022 Mar 18;11:e67190. doi: 10.7554/eLife.67190 (PMC8933005; doi:10.7554/eLife.67190)
Supplement: Figure 1—source data 3. [file elife-67190-fig1-data3.xlsx]

## Sheet: Poly Caspases et I.P. F6MC1 (2)
Figure 1-source data 3
MEAN	2 irradiazioni					4 irradiazioni					6irradiazioni 12h later					6 irradiazioni 4gg dopo
DATA graphic		Non-irradiated	PTV	Margin -8 to +27mm	Margin +27 to +62mm		Non-irradiated	PTV	Margin -8 to +27mm	Margin +27 to +62mm		Non-irradiated	PTV	Margin -8 to +27mm	Margin +27 to +62mm		Non-irradiated	Margin +27 to +62mm	Margin -8 to +27mm	PTV
living	0	97.9667	96.0667	98.0333	98.1333		97.2667	91.9667	95.4	96.2333		98.1667	90.2333	97.0667	98.1		97	97.1333	93	80.6667
Caspase-independent cell death	0	0.633333	2.23333	0.933333	0.766667		1.03333	2.6	2.26667	2.36667		0.733333	1.43333	0.733333	0.7		1.76667	1.4	2.1	2.5
Early apoptosis	0	0.7	1.13333	0.666667	0.666667		1.2	4.13333	1.7	0.766667		0.733333	6.56667	1.46667	0.733333		0.766667	1	3.23333	12.4667
Late apoptosis	0	0.7	0.533333	0.366667	0.466667		0.533333	1.26667	0.6	0.633333		0.366667	1.76667	0.666667	0.433333		0.5	0.5	1.66667	4.33333
SD	2 irradiazioni					4 irradiazioni					6irradiazioni 12h later					6 irradiazioni 4gg dopo
DATA graphic		Non-irradiated	PTV	Margin -8 to +27mm	Margin +27 to +62mm		Non-irradiated	PTV	Margin -8 to +27mm	Margin +27 to +62mm		Non-irradiated	PTV	Margin -8 to +27mm	Margin +27 to +62mm		Non-irradiated	Margin +27 to +62mm	Margin -8 to +27mm	PTV
Q3/living	0	0.057735	1.06927	0.152753	0.208167		0.404145	0.503322	1.08167	0.493288		0.057735	0.986577	0.665833	0.4		0.655744	0.351188	1.21655	2.2723
Q4/general dying	0	0.057735	0.85049	0.11547	0.208167		0.057735	0.3	0.907377	0.602771		0.152753	0.23094	0.321455	0.1		0.321455	0.34641	0.793725	0.173205
Q1/early apoptosis	0	0.1	0.152753	0.152753	0.057735		0.264575	0.305505	0.173205	0.11547		0.208167	0.907377	0.305505	0.251661		0.251661	0.173205	0.83865	1.11505
late apoptosis	0	0.1	0.11547	0.057735	0.11547		0.11547	0.23094	0.1	0.251661		0.057735	0.251661	0.11547	0.11547		0.1	0.1	0.305505	1.00664
citofluorimetria	after n° irradiazioni		Q condition	misura 1	misura 2	misura 3	media	DS	t-test (Non-irradiated vs irradiated)
First	2																	Deviation stardard
		Non-irradiated																Graphic	Q1	Q2	Q3	Q4
			Q1	0.7	0.6	0.8	0.7	0.1
			Q2	0.8	0.7	0.6	0.7	0.1										Non-irradiated	0.1	0.1	0.057735	0.057735
			Q3	97.9	98	98	97.9667	0.057735										Proximal margin (+27 to +62mm)	0.057735	0.11547	0.208167	0.208167
			Q4	0.6	0.7	0.6	0.633333	0.057735										Margin -8 to +27mm	0.152753	0.057735	0.152753	0.11547
																		PTV	0.152753	0.11547	1.06927	0.85049
		Proximal margin (+27 to +62mm)	Q1	0.6	0.7	0.7	0.666667	0.057735	0.64945	NS
			Q2	0.6	0.4	0.4	0.466667	0.11547	0.0584402	NS								Non-irradiated	0.264575	0.11547	0.404145	0.057735
			Q3	97.9	98.3	98.2	98.1333	0.208167	0.298015	NS								Proximal margin (+27 to +62mm)	0.11547	0.251661	0.493288	0.602771
			Q4	1	0.6	0.7	0.766667	0.208167	0.384053	NS								Margin -8 to +27mm	0.173205	0.1	1.08167	0.907377
																		PTV	0.305505	0.23094	0.503322	0.3
		Margin -8 to +27mm	Q1	0.5	0.7	0.8	0.666667	0.152753	0.770026	NS
			Q2	0.3	0.4	0.4	0.366667	0.057735	0.0131721	*								Non-irradiated	0.208167	0.057735	0.057735	0.152753
			Q3	98.2	97.9	98	98.0333	0.152753	0.538386	NS								Proximal margin (+27 to +62mm)	0.251661	0.11547	0.4	0.1
			Q4	1	1	0.8	0.933333	0.11547	0.0285958	*								Margin -8 to +27mm	0.305505	0.11547	0.665833	0.321455
																		PTV	0.907377	0.251661	0.986577	0.23094
		PTV	Q1	1.3	1.1	1	1.13333	0.152753	0.0198551	*
			Q2	0.6	0.6	0.4	0.533333	0.11547	0.133233	NS								Non-irradiated	0.251661	0.1	0.655744	0.321455
			Q3	94.9	96.3	97	96.0667	1.06927	0.0909103	NS								Proximal margin (+27 to +62mm)	0.173205	0.1	0.351188	0.34641
			Q4	3.2	1.9	1.6	2.23333	0.85049	0.0820038	NS								Margin -8 to +27mm	0.83865	0.305505	1.21655	0.793725
																		PTV	1.11505	1.00664	2.2723	0.173205
Second	4
		Non-irradiated
			Q1	1.3	1.4	0.9	1.2	0.264575
			Q2	0.6	0.6	0.4	0.533333	0.11547
			Q3	97.2	96.9	97.7	97.2667	0.404145
			Q4	1	1.1	1	1.03333	0.057735
		Proximal margin (+27 to +62mm)	Q1	0.9	0.7	0.7	0.766667	0.11547	0.0883547	NS
			Q2	0.6	0.9	0.4	0.633333	0.251661	0.57877	NS
			Q3	96.8	96	95.9	96.2333	0.493288	0.0506347	NS
			Q4	1.8	2.3	3	2.36667	0.602771	0.0606195	NS
		Margin -8 to +27mm	Q1	1.5	1.8	1.8	1.7	0.173205	0.0612058	NS
			Q2	0.5	0.7	0.6	0.6	0.1	0.492572	NS
			Q3	96.3	94.2	95.7	95.4	1.08167	0.0817994	NS
			Q4	1.6	3.3	1.9	2.26667	0.907377	0.142223	NS
		PTV	Q1	4.4	3.8	4.2	4.13333	0.305505	0.000259293	***
			Q2	1.4	1	1.4	1.26667	0.23094	0.0168559	NS
			Q3	91.9	92.5	91.5	91.9667	0.503322	0.000188904	***
			Q4	2.3	2.6	2.9	2.6	0.3	0.00992182	**
Third	6, 12 hours later
		Non-irradiated
			Q1	0.8	0.9	0.5	0.733333	0.208167
			Q2	0.4	0.3	0.4	0.366667	0.057735
			Q3	98.1	98.2	98.2	98.1667	0.057735
			Q4	0.7	0.6	0.9	0.733333	0.152753
		Proximal margin (+27 to +62mm)	Q1	1	0.5	0.7	0.733333	0.251661	1	NS
			Q2	0.5	0.3	0.5	0.433333	0.11547	0.438193	NS
			Q3	97.7	98.5	98.1	98.1	0.4	0.801015	NS
			Q4	0.7	0.6	0.8	0.7	0.1	0.770026	NS
		Margin -8 to +27mm	Q1	1.4	1.2	1.8	1.46667	0.305505	0.0321674	*
			Q2	0.6	0.6	0.8	0.666667	0.11547	0.0285958	*
			Q3	97.4	97.5	96.3	97.0667	0.665833	0.102426	NS
			Q4	0.5	0.6	1.1	0.733333	0.321455	1	NS
		PTV	Q1	7.6	5.9	6.2	6.56667	0.907377	0.00585105	**
			Q2	2	1.5	1.8	1.76667	0.251661	0.00801306	**
			Q3	89.1	90.9	90.7	90.2333	0.986577	0.00499518	**
			Q4	1.3	1.7	1.3	1.43333	0.23094	0.01623	*
Fourth	6, 4 days later
		Non-irradiated
			Q1	1	0.8	0.5	0.766667	0.251661
			Q2	0.6	0.5	0.4	0.5	0.1
			Q3	96.4	96.9	97.7	97	0.655744
			Q4	2	1.9	1.4	1.76667	0.321455
		Proximal margin (+27 to +62mm)	Q1	0.9	1.2	0.9	1	0.173205	0.264695	NS
			Q2	0.5	0.6	0.4	0.5	0.1	1	NS
			Q3	96.8	97.1	97.5	97.1333	0.351188	0.776159	NS
			Q4	1.8	1.2	1.2	1.4	0.34641	0.250525	NS
		Margin -8 to +27mm	Q1	2.8	2.7	4.2	3.23333	0.83865	0.0281673	*
			Q2	2	1.4	1.6	1.66667	0.305505	0.0148789	*
			Q3	92.2	94.4	92.4	93	1.21655	0.0144394	*
			Q4	3	1.5	1.8	2.1	0.793725	0.554481	NS
		PTV	Q1	13.3	12.9	11.2	12.4667	1.11505	0.00202686	**
			Q2	5.4	4.2	3.4	4.33333	1.00664	0.021348	*
			Q3	78.6	80.3	83.1	80.6667	2.2723	0.00382524	**
			Q4	2.6	2.6	2.3	2.5	0.173205	0.0386591	*

## Sheet: Poly Caspases et I.P. MDA-MB231
irradiation		Q condition	measure 1	measure 2	measure 3	mean	SD	t-test (non-irradiated vs PTV)				2 irradiations			4 irradiations				6 Irradiations, 12 hours later
											DATA graphic		non-irradiated	Irra		non-irradiated	Irra		non-irradiated	Irra
2x2Gy											Q3/living	0	97.7	96.6667		96.9	91.3		97.5667	84.2667
	non-irradiated										Q1/early apoptosis	0	0	0.0666667		0.1	0.233333		0.0333333	0.266667
		Q1	0	0	0	0	0				Q2/late apoptosis	0	0.466667	1.43333		0.8	2.56667		0.466667	5.13333
		Q2	0.5	0.5	0.4	0.466667	0.057735				Q4/general dying	0	1.83333	1.83333		2.2	5.96667		1.9	10.3333
		Q3	97.7	98	97.4	97.7	0.3
		Q4	1.8	1.5	2.2	1.83333	0.351188				SD	2 irradiations			4 irradiations				6 Irradiations, 12 hours later
		Q1+Q2+Q4	2.3	2	2.6	2.3	0.3				DATA graphic		non-irradiated	Irra		non-irradiated	Irra		non-irradiated	Irra
											Q3/living		0.3	0.450925		0.2	0.69282		0.11547	1.13725
	PTV										Q1/early apoptosis		0	0.057735		1.69967e-17	0.11547		0.057735	0.057735
		Q1	0.1	0	0.1	0.0666667	0.057735	0.183503	NS		Q2/late apoptosis		0.321455	0.057735		0.1	1.35769		0.057735	0.251661
		Q2	1.8	1.2	1.3	1.43333	0.321455	0.0315648	*		Q4/general dying		0.351188	0.152753		0.1	0.80829		0.2	0.950438
		Q3	96.2	97.1	96.7	96.6667	0.450925	0.0366453	*
		Q4	1.8	1.7	2	1.83333	0.152753	1	NS
		Q1+Q2+Q4	3.7	2.9	3.4	3.33333	0.404145	0.0270536	*
4x2Gy
	non-irradiated
		Q1	0.1	0.1	0.1	0.1	1.69967e-17
		Q2	0.7	0.8	0.9	0.8	0.1
		Q3	97.1	96.9	96.7	96.9	0.2
		Q4	2.1	2.2	2.3	2.2	0.1
		Q1+Q2+Q4	2.9	3.1	3.3	3.1	0.2
	PTV
		Q1	0.1	0.3	0.3	0.233333	0.11547	0.183503	NS
		Q2	1	3.4	3.3	2.56667	1.35769	0.152236	NS
		Q3	92.1	90.9	90.9	91.3	0.69282	0.00291775	**
		Q4	6.9	5.5	5.5	5.96667	0.80829	0.0139422	*
		Q1+Q2+Q4	8	9.2	9.1	8.76667	0.665833	0.00247883	**
6x2Gy
	non-irradiated
		Q1	0	0	0.1	0.0333333	0.057735
		Q2	0.4	0.5	0.5	0.466667	0.057735
		Q3	97.5	97.5	97.7	97.5667	0.11547
		Q4	2.1	1.9	1.7	1.9	0.2
		Q1+Q2+Q4	2.5	2.4	2.3
	PTV
		Q1	0.2	0.3	0.3	0.266667	0.057735	0.0077626	**
		Q2	4.9	5.1	5.4	5.13333	0.251661	0.000570827	***
		Q3	84.6	85.2	83	84.2667	1.13725	0.00222693	**
		Q4	10.3	9.4	11.3	10.3333	0.950438	0.00306395	**
		Q1+Q2+Q4	15.4	14.8	17	15.7333	1.13725	0.00226396	**
