# Supplementary material for: The out-of-field dose in radiation therapy induces delayed tumorigenesis by senescence evasion
Source: eLife. 2022 Mar 18;11:e67190. doi: 10.7554/eLife.67190 (PMC8933005; doi:10.7554/eLife.67190)
Supplement: Figure 2—figure supplement 1—source data 1. [file elife-67190-fig2-figsupp1-data1.xlsx]

## Sheet: f1mc
Figure 2 – Figure supplement 1-source data 1
	jeune	O 6well F6	O 5x2 Gy	O10 x2 Gy	pc f6	pc 5x2 Gy	pc 10x2Gy	PN F6	Pn 5x2Gy	PN 10x2Gy	senescente	F6 NAC NI	F6 NAC PN	F6 NAC O	F6NAC PC	F6NI	F6 O	F6 PC	F6 PN	F26 O	F26 PC	F26PN	SC12
C12FDG mean	405	122	338	348	235	500	681	213	306	485	398	229	313	205	219	226	177	297	268	187	210	186	362
C12FDG median	341	107	283	293	204	462	676	186	220	458	258	200	285	186	198	193	158	275	239	172	192	170	340
SSC mean	13241	11592	12782	12948	17931	18507	18184	16207	12702	16150	20223	11636	16860	16343	13695	12386	12675	19618	19029	18635	20119	19864	32299
SSC median	12144	10480	12224	11792	17152	18160	18656	15248	11584	15424	18864	10624	16048	15408	13008	11280	12736	19248	18720	17360	19504	19152	32240
FSC mean	38730	18531	35846	30536	35103	34629	39871	27519	32435	34377	32428	41225	39081	38502	36447	41252	36573	44636	43226	33444	36611	35685	46615
FSC median	40384	15568	37488	30400	36272	35504	45696	25696	32688	35312	31664	44064	41600	40992	38432	44640	39616	49168	48448	33984	38640	37280	51120
			F1MC
					5 x 2 Gy			10 x 2 Gy
			Non irradiated	replicative senescente	margin from 22 to 47 mm	margin from - 5 to 20 mm	PTV	margin from 22 to 47 mm	margin from - 5 to 20 mm	PTV
		C12FDG median	341	258	283	220	462	293	458	676
		SSC median	12144	18864	12224	11584	18160	11792	15424	18656
		FSC median	40384	31664	37488	32688	35504	30400	35312	45696

## Sheet: f6mc
	jeune	O 6well F6	O 5x2 Gy	O10 x2 Gy	pc f6	pc 5x2 Gy	pc 10x2Gy	PN F6	Pn 5x2Gy	PN 10x2Gy	senescente	F6 NAC NI	F6 NAC PN	F6 NAC O	F6NAC PC	F6NI	F6 O	F6 PC	F6 PN	F26 O	F26 PC	F26PN	SC12
C12FDG mean	405	122	338	348	235	500	681	213	306	485	398	229	313	205	219	226	177	297	268	187	210	186	362
C12FDG median	341	107	283	293	204	462	676	186	220	458	258	200	285	186	198	193	158	275	239	172	192	170	340
SSC mean	13241	11592	12782	12948	17931	18507	18184	16207	12702	16150	20223	11636	16860	16343	13695	12386	12675	19618	19029	18635	20119	19864	32299
SSC median	12144	10480	12224	11792	17152	18160	18656	15248	11584	15424	18864	10624	16048	15408	13008	11280	12736	19248	18720	17360	19504	19152	32240
FSC mean	38730	18531	35846	30536	35103	34629	39871	27519	32435	34377	32428	41225	39081	38502	36447	41252	36573	44636	43226	33444	36611	35685	46615
FSC median	40384	15568	37488	30400	36272	35504	45696	25696	32688	35312	31664	44064	41600	40992	38432	44640	39616	49168	48448	33984	38640	37280	51120
							F6MC1
								10 x 2 Gy
							replicative senescent	non irradiated	margin (+22 to +47 mm)	margin (- 5 to +20 mm)	PTV
						C12FDG median	340	193	158	239	275
						SSC median	32240	11280	12736	18720	19248
						FSC median	51120	44640	39616	48448	49168

## Sheet: f26mc
	jeune	O 6well F6	O 5x2 Gy	O10 x2 Gy	pc f6	pc 5x2 Gy	pc 10x2Gy	PN F6	Pn 5x2Gy	PN 10x2Gy	senescente	F6 NAC NI	F6 NAC PN	F6 NAC O	F6NAC PC	F6NI	F6 O	F6 PC	F6 PN	F26 O	F26 PC	F26PN	SC12
C12FDG mean	405	122	338	348	235	500	681	213	306	485	398	229	313	205	219	226	177	297	268	187	210	186	362
C12FDG median	341	107	283	293	204	462	676	186	220	458	258	200	285	186	198	193	158	275	239	172	192	170	340
SSC mean	13241	11592	12782	12948	17931	18507	18184	16207	12702	16150	20223	11636	16860	16343	13695	12386	12675	19618	19029	18635	20119	19864	32299
SSC median	12144	10480	12224	11792	17152	18160	18656	15248	11584	15424	18864	10624	16048	15408	13008	11280	12736	19248	18720	17360	19504	19152	32240
FSC mean	38730	18531	35846	30536	35103	34629	39871	27519	32435	34377	32428	41225	39081	38502	36447	41252	36573	44636	43226	33444	36611	35685	46615
FSC median	40384	15568	37488	30400	36272	35504	45696	25696	32688	35312	31664	44064	41600	40992	38432	44640	39616	49168	48448	33984	38640	37280	51120
																	F26FC
																	10 x 2 Gy
																	non irradiated (F6MC)	margin from 22 to 47 mm	margin from - 5 to 20 mm	PTV	replicative senescent
																C12FDG median	193	172	170	192	340
																SSC median	11280	17360	19152	19504	32240
																FSC median	44640	33984	37280	38640	51120
