# Supplementary material for: The out-of-field dose in radiation therapy induces delayed tumorigenesis by senescence evasion
Source: eLife. 2022 Mar 18;11:e67190. doi: 10.7554/eLife.67190 (PMC8933005; doi:10.7554/eLife.67190)
Supplement: Figure 2—figure supplement 3—source data 1. [file elife-67190-fig2-figsupp3-data1.xlsx]

## Sheet: raffinement
Figure 2 – Figure Supplement 3-source data 1		PTV			margin -5 to 20 mm			margin 22 to 47 mm
	NI	2 x 2 Gy	5 x 2 Gy	10 x 2 Gy	2 x 2 Gy	5 x 2 Gy	10 x 2 Gy	2 x 2 Gy	5 x 2 Gy	10 x 2 Gy
fold change in p16 expression	1	2.92902	0.508065	0.885427	0.282391	1.04282	2.39546	0.603272	1.39577	0.942546
ecartype	0	0.890445	0.0655659	0.587801	0.174766	0.785916	0.952312	0.217925	0.67667	0.206111
		*	**		**		**

## Sheet: stat
Well			p16 Ct (dRn)	EAR Ct (dRn)	moyenne EAR	delta CT				delta delta CT			ecart type
A1	water		No Ct
A2	water		No Ct
A3	water		No Ct
A4	1/10		28.05
A5	1/10		28.44
A6	1/10		28.21
A7	1/100		30.71
A8	1/100		32.12
A9	1/100		31.14
A10	1/1000		35.32
A11	1/1000		37.46
A12	1/1000		33.66
B1	non irradiated		28.35	14.54	14.11	14.24	14.24			0	1
B2	non irradiated		28.72	13.64		14.61	14.61			0	1
B3	non irradiated		29.09	14.15		14.98	14.98			0	1
B4	margin 22 to 47 mm	2 x 2 Gy + 24 h	29.69	14.15	14.5733	15.1167	14.24	0.164064		0.876667	0.544624	1	0.217925	0.136846
B5	margin 22 to 47 mm	2 x 2 Gy + 24 h	29.03	14.91		14.4567	14.61			-0.153333	1.11214	1
B6	margin 22 to 47 mm	2 x 2 Gy + 24 h	30.07	14.66		15.4967	14.98			0.516667	0.698985	1
B10	margin 22 to 47 mm	5 x 2 Gy + 24 h	27.87	15.45	15.19	12.68	14.24	0.169552		-1.56	2.94854	1	0.67667	0.0930446
B11	margin 22 to 47 mm	5 x 2 Gy + 24 h	28.85	15.2		13.66	14.61			-0.95	1.93187	1
B12	margin 22 to 47 mm	5 x 2 Gy + 24 h	30.29	14.92		15.1	14.98			0.12	0.920188	1
C4	margin 22 to 47 mm	10 x 2 Gy + 24 h	28.78	15.03	14.9367	13.8433	14.24	0.281328		-0.396667	1.31646	1	0.206111	0.144501
C5	margin 22 to 47 mm	10 x 2 Gy + 24 h	29.73	14.96		14.7933	14.61			0.183333	0.880666	1
C6	margin 22 to 47 mm	10 x 2 Gy + 24 h	29.46	14.82		14.5233	14.98			-0.456667	1.37237	1
C10	margin -5 to 20 mm	2 x 2 Gy + 24 h	28.77	13.46	13.9233	14.8467	14.24	0.0495878	*	0.606667	0.656712	1	0.174766	0.00514366	**
C11	margin -5 to 20 mm	2 x 2 Gy + 24 h	30.28	14.68		16.3567	14.61			1.74667	0.297989	1
C12	margin -5 to 20 mm	2 x 2 Gy + 24 h	31.03	13.63		17.1067	14.98			2.12667	0.228986	1
D4	margin -5 to 20 mm	5 x 2 Gy + 24 h	29.83	14.92	15.2767	14.5533	14.24	0.239409		0.313333	0.80478	1	0.785916	0.242393
D5	margin -5 to 20 mm	5 x 2 Gy + 24 h	30	14.99		14.7233	14.61			0.113333	0.92445	1
D6	margin -5 to 20 mm	5 x 2 Gy + 24 h	28.86	15.92		13.5833	14.98			-1.39667	2.63293	1
D10	margin -5 to 20 mm	10 x 2 Gy + 24 h	27.63	15.8	15.4533	12.1767	14.24	0.00376118	**	-2.06333	4.17951	1	0.952312	0.0091888	**
D11	margin -5 to 20 mm	10 x 2 Gy + 24 h	28.73	15.28		13.2767	14.61			-1.33333	2.51984	1
D12	margin -5 to 20 mm	10 x 2 Gy + 24 h	28.07	15.28		12.6167	14.98			-2.36333	5.14558	1
E7	PTV	2 x 2 Gy + 24 h	28.95	15.81	15.3133	13.6367	14.24	0.0213587	*	-0.603333	1.51922	1	0.890445	0.0461777	*
E8	PTV	2 x 2 Gy + 24 h	27.97	14.96		12.6567	14.61			-1.95333	3.87268	1
E9	PTV	2 x 2 Gy + 24 h	28.32	15.17		13.83	14.98			-1.15	2.21914	1
F1	PTV	5 x 2 Gy + 24 h	29.58	14.87	14.6533	14.9267	14.24	0.0360261	*	0.686667	0.621288	1	0.0655659	0.00129432	**
F2	PTV	5 x 2 Gy + 24 h	30.2	14.44		15.5467	14.61			0.936667	0.522439	1
F3	PTV	5 x 2 Gy + 24 h	30.11	14.65		15.4567	14.98			0.476667	0.718636	1
E4	PTV	10 x 2 Gy + 24 h	28.63	15.79	15.4333	13.1967	14.24	0.480394		-1.04333	2.06098	1	0.587801	0.354615
E5	PTV	10 x 2 Gy + 24 h	30.24	15.08		14.8067	14.61			0.196667	0.872564	1
E6	PTV	10 x 2 Gy + 24 h	31.14	15.43		15.7067	14.98			0.726667	0.604299	1
