# Supplementary material for: The out-of-field dose in radiation therapy induces delayed tumorigenesis by senescence evasion
Source: eLife. 2022 Mar 18;11:e67190. doi: 10.7554/eLife.67190 (PMC8933005; doi:10.7554/eLife.67190)
Supplement: Figure 2—figure supplement 3—source data 2. [file elife-67190-fig2-figsupp3-data2.xlsx]

## Sheet: EAR
Well			Threshold (dRn)	Ct (dRn)
A1	water		0.1859	23.93
A2	water		0.1859	21.81
A3	water		0.1859	24.43
A4	1/10		0.1859	15.03
A5	1/10		0.1859	15.36
A6	1/10		0.1859	15.29
A7	1/100		0.1859	18.05
A8	1/100		0.1859	18.28
A9	1/100		0.1859	18.27
A10	1/1000		0.1859	22.04
A11	1/1000		0.1859	22.2
A12	1/1000		0.1859	21.62
B1	non irradiated		0.1859	13.82
B2	non irradiated		0.1859	13.76
B3	non irradiated		0.1859	13.54
B4	margin 22 to 47 mm	2 x 2 Gy + 24 h	0.1859	13.87
B5	margin 22 to 47 mm	2 x 2 Gy + 24 h	0.1859	14.14
B6	margin 22 to 47 mm	2 x 2 Gy + 24 h	0.1859	13.71
B7	margin 22 to 47 mm	2 x 2 Gy+ 96h	0.1859	14.3
B8	margin 22 to 47 mm	2 x 2 Gy+ 96h	0.1859	14.21
B9	margin 22 to 47 mm	2 x 2 Gy+ 96h	0.1859	13.9
B10	margin 22 to 47 mm	5 x 2 Gy + 24 h	0.1859	15
B11	margin 22 to 47 mm	5 x 2 Gy + 24 h	0.1859	14.82
B12	margin 22 to 47 mm	5 x 2 Gy + 24 h	0.1859	15.06
C1	margin 22 to 47 mm	5 x 2 Gy+ 96h	0.1859	15.08
C2	margin 22 to 47 mm	5 x 2 Gy + 24 h	0.1859	15.52
C3	margin 22 to 47 mm	5 x 2 Gy + 24 h	0.1859	15.13
C4	margin 22 to 47 mm	10 x 2 Gy + 24 h	0.1859	14.92
C5	margin 22 to 47 mm	10 x 2 Gy + 24 h	0.1859	14.69
C6	margin 22 to 47 mm	10 x 2 Gy + 24 h	0.1859	14.83
C7	margin 22 to 47 mm	10 x 2 Gy+ 96h	0.1859	16.16
C8	margin 22 to 47 mm	10 x 2 Gy + 24 h	0.1859	15.97
C9	margin 22 to 47 mm	10 x 2 Gy + 24 h	0.1859	15.78
C10	margin -5 to 20 mm	2 x 2 Gy + 24 h	0.1859	14.14
C11	margin -5 to 20 mm	2 x 2 Gy + 24 h	0.1859	14.61
C12	margin -5 to 20 mm	2 x 2 Gy + 24 h	0.1859	14.3
D1	margin -5 to 20 mm	2 x 2 Gy+ 96h	0.1859	13.44
D2	margin -5 to 20 mm	2 x 2 Gy+ 96h	0.1859	13.62
D3	margin -5 to 20 mm	2 x 2 Gy+ 96h	0.1859	13.75
D4	margin -5 to 20 mm	5 x 2 Gy + 24 h	0.1859	14.34
D5	margin -5 to 20 mm	5 x 2 Gy + 24 h	0.1859	14.27
D6	margin -5 to 20 mm	5 x 2 Gy + 24 h	0.1859	14.48
D7	margin -5 to 20 mm	5 x 2 Gy+ 96h	0.1859	13.93
D8	margin -5 to 20 mm	5 x 2 Gy+ 96h	0.1859	14.18
D9	margin -5 to 20 mm	5 x 2 Gy+ 96h	0.1859	14
D10	margin -5 to 20 mm	10 x 2 Gy + 24 h	0.1859	14.36
D11	margin -5 to 20 mm	10 x 2 Gy + 24 h	0.1859	14.56
D12	margin -5 to 20 mm	10 x 2 Gy + 24 h	0.1859	14.43
E1	margin -5 to 20 mm	10 x 2 Gy+ 96h	0.1859	14.42
E2	margin -5 to 20 mm	10 x 2 Gy+ 96h	0.1859	14.57
E3	margin -5 to 20 mm	10 x 2 Gy+ 96h	0.1859	14.77
E4	PTV	10 x 2 Gy + 24 h	0.1859	13.72
E5	PTV	10 x 2 Gy + 24 h	0.1859	13.77
E6	PTV	10 x 2 Gy + 24 h	0.1859	14.02
E7	PTV	2 x 2 Gy + 24 h	0.1859	14.42
E8	PTV	2 x 2 Gy + 24 h	0.1859	14.56
E9	PTV	2 x 2 Gy + 24 h	0.1859	14.87
E10	PTV	2 x 2 Gy+ 96h	0.1859	13.69
E11	PTV	2 x 2 Gy+ 96h	0.1859	13.59
E12	PTV	2 x 2 Gy+ 96h	0.1859	13.96
F1	PTV	5 x 2 Gy + 24 h	0.1859	15.7
F2	PTV	5 x 2 Gy + 24 h	0.1859	15.85
F3	PTV	5 x 2 Gy + 24 h	0.1859	15.58
	PTV	5 x 2 Gy+ 96h
	PTV	5 x 2 Gy+ 96h
	PTV	5 x 2 Gy+ 96h

## Sheet: p21
Well			Threshold (dRn)	Ct (dRn)	CT EAR	delta CT	t-test
A1	water		0.4519	No Ct	23.93	#VALUE!
A2	water		0.4519	No Ct	21.81	#VALUE!
A3	water		0.4519	No Ct	24.43	#VALUE!
A4	1/10		0.4519	21.7	15.03	6.67
A5	1/10		0.4519	21.94	15.36	6.58
A6	1/10		0.4519	21.72	15.29	6.43
A7	1/100		0.4519	24.88	18.05	6.83
A8	1/100		0.4519	24.79	18.28	6.51
A9	1/100		0.4519	24.72	18.27	6.45
A10	1/1000		0.4519	31.13	22.04	9.09
A11	1/1000		0.4519	30.73	22.2	8.53
A12	1/1000		0.4519	30.88	21.62	9.26
B1	non irradiated		0.4519	21.33	13.82	7.51
B2	non irradiated		0.4519	20.97	13.76	7.21
B3	non irradiated		0.4519	20.96	13.54	7.42
B4	margin 22 to 47 mm	2 x 2 Gy + 24 h	0.4519	21.17	13.87	7.3	0.928261	NS
B5	margin 22 to 47 mm	2 x 2 Gy + 24 h	0.4519	21.34	14.14	7.2
B6	margin 22 to 47 mm	2 x 2 Gy + 24 h	0.4519	21.4	13.71	7.69
B7	margin 22 to 47 mm	2 x 2 Gy+ 96h	0.4519	21.22	14.3	6.92	0.015939	*
B8	margin 22 to 47 mm	2 x 2 Gy+ 96h	0.4519	21.23	14.21	7.02
B9	margin 22 to 47 mm	2 x 2 Gy+ 96h	0.4519	20.94	13.9	7.04
B10	margin 22 to 47 mm	5 x 2 Gy + 24 h	0.4519	20.57	15	5.57	0.000336084	***
B11	margin 22 to 47 mm	5 x 2 Gy + 24 h	0.4519	20.77	14.82	5.95
B12	margin 22 to 47 mm	5 x 2 Gy + 24 h	0.4519	20.84	15.06	5.78
C1	margin 22 to 47 mm	5 x 2 Gy+ 96h	0.4519	21.63	15.08	6.55	0.00511251	**
C2	margin 22 to 47 mm	5 x 2 Gy + 24 h	0.4519	21.57	15.52	6.05
C3	margin 22 to 47 mm	5 x 2 Gy + 24 h	0.4519	21.63	15.13	6.5
C4	margin 22 to 47 mm	10 x 2 Gy + 24 h	0.4519	20.75	14.92	5.83	0.000472255	***
C5	margin 22 to 47 mm	10 x 2 Gy + 24 h	0.4519	20.86	14.69	6.17
C6	margin 22 to 47 mm	10 x 2 Gy + 24 h	0.4519	20.81	14.83	5.98
C7	margin 22 to 47 mm	10 x 2 Gy+ 96h	0.4519	20.77	16.16	4.61	8.19026e-05	***
C8	margin 22 to 47 mm	10 x 2 Gy + 24 h	0.4519	20.83	15.97	4.86
C9	margin 22 to 47 mm	10 x 2 Gy + 24 h	0.4519	20.83	15.78	5.05
C10	margin -5 to 20 mm	2 x 2 Gy + 24 h	0.4519	21.01	14.14	6.87	0.0223568	*
C11	margin -5 to 20 mm	2 x 2 Gy + 24 h	0.4519	21.08	14.61	6.47
C12	margin -5 to 20 mm	2 x 2 Gy + 24 h	0.4519	21.24	14.3	6.94
D1	margin -5 to 20 mm	2 x 2 Gy+ 96h	0.4519	21.55	13.44	8.11	0.107944	NS
D2	margin -5 to 20 mm	2 x 2 Gy+ 96h	0.4519	21.24	13.62	7.62
D3	margin -5 to 20 mm	2 x 2 Gy+ 96h	0.4519	21.34	13.75	7.59
D4	margin -5 to 20 mm	5 x 2 Gy + 24 h	0.4519	20.11	14.34	5.77	0.000230605	***
D5	margin -5 to 20 mm	5 x 2 Gy + 24 h	0.4519	20.3	14.27	6.03
D6	margin -5 to 20 mm	5 x 2 Gy + 24 h	0.4519	20.29	14.48	5.81
D7	margin -5 to 20 mm	5 x 2 Gy+ 96h	0.4519	20.6	13.93	6.67	0.00224264	**
D8	margin -5 to 20 mm	5 x 2 Gy+ 96h	0.4519	20.62	14.18	6.44
D9	margin -5 to 20 mm	5 x 2 Gy+ 96h	0.4519	20.64	14	6.64
D10	margin -5 to 20 mm	10 x 2 Gy + 24 h	0.4519	19.86	14.36	5.5	0.000179114	***
D11	margin -5 to 20 mm	10 x 2 Gy + 24 h	0.4519	19.98	14.56	5.42
D12	margin -5 to 20 mm	10 x 2 Gy + 24 h	0.4519	20.19	14.43	5.76
E1	margin -5 to 20 mm	10 x 2 Gy+ 96h	0.4519	20.15	14.42	5.73	0.00763655	**
E2	margin -5 to 20 mm	10 x 2 Gy+ 96h	0.4519	20.29	14.57	5.72
E3	margin -5 to 20 mm	10 x 2 Gy+ 96h	0.4519	21.29	14.77	6.52
E4	PTV	10 x 2 Gy + 24 h	0.4519	20.22	13.72	6.5	0.00848263	**
E5	PTV	10 x 2 Gy + 24 h	0.4519	19.92	13.77	6.15
E6	PTV	10 x 2 Gy + 24 h	0.4519	20.75	14.02	6.73
E7	PTV	2 x 2 Gy + 24 h	0.4519	20.63	14.42	6.21	0.0015704	**
E8	PTV	2 x 2 Gy + 24 h	0.4519	20.67	14.56	6.11
E9	PTV	2 x 2 Gy + 24 h	0.4519	20.57	14.87	5.7
E10	PTV	2 x 2 Gy+ 96h	0.4519	20.86	13.69	7.17	0.110981	NS
E11	PTV	2 x 2 Gy+ 96h	0.4519	20.85	13.59	7.26
E12	PTV	2 x 2 Gy+ 96h	0.4519	21.04	13.96	7.08
F1	PTV	5 x 2 Gy + 24 h	0.4519	20.33	15.7	4.63	7.84531e-06	***
F2	PTV	5 x 2 Gy + 24 h	0.4519	20.45	15.85	4.6
F3	PTV	5 x 2 Gy + 24 h	0.4519	20.1	15.58	4.52
	PTV	5 x 2 Gy+ 96h
	PTV	5 x 2 Gy+ 96h
	PTV	5 x 2 Gy+ 96h

## Sheet: bilan
		PTV			Margin -5 to +20mm			Margin +22 to +47mm
	Non-irradiated	2x2Gy	5x2Gy	10x2Gy	2x2Gy	5x2Gy	10x2Gy	2x2Gy	5x2Gy	10x2Gy
p21	1	1.45	3.56	3.21	1.54	2.42	2.88	1.03	2.86	2.48
	NI	PTV			Margin -5 to 20 mm			Margin 22 to 47 mm
		2x2 Gy	5x2 Gy	10x2 Gy	2x2 Gy	5x2 Gy	10x2 Gy	2x2 Gy	5x2 Gy	10x2 Gy
p21	0	0.17	0.4	0.5	0.2	0.24	0.3	0.13	0.3	0.24
		**	***	**	*	***	***	NS	***	***
