# Supplementary material for: The out-of-field dose in radiation therapy induces delayed tumorigenesis by senescence evasion
Source: eLife. 2022 Mar 18;11:e67190. doi: 10.7554/eLife.67190 (PMC8933005; doi:10.7554/eLife.67190)
Supplement: Figure 2—figure supplement 4—source data 2. [file elife-67190-fig2-figsupp4-data2.xlsx]

## Sheet: racap
	Autofluo	Non irradiated	1x2Gy PTV	1x2Gy margin from -5 to 20 mm	1x2Gy margin from 22 to 47 mm	5x2Gy PTV	5x2Gy margin from -5 to 20 mm	5x2Gy margin from 22 to 47 mm
	7.4182	8.30459	7.12494	6.72266	4.94421	8.36859	8.94196	6.60783
	7.75708	10.9891	7.56504	7.26627	6.1641	10.0415	9.26093	8.44703
	8.0642	11.9185	7.7462	8.23074	7.13225	10.407	10.3993	9.20544
	8.70954	12.8427	9.50731	9.41313	7.2089	10.579	11.6999	9.96677
	9.31233	13.32	9.56093	9.53677	7.5035	10.6453	12.1392	10.0767
	10.5929	13.467	10.648	9.83824	8.33572	11.5133	12.3899	11.1513
	10.8685	13.5415	13.2365	10.1988	8.82341	11.6841	13.2095	11.4519
	10.9587	15.1521	13.4239	10.5446	9.35943	11.9652	13.2435	12.6362
	11.0702	15.2739	14.1653	12.097	9.87982	12.8222	13.4116	13.5572
	11.2483	15.6009	14.3588	12.4537	10.3994	12.8673	14.5378	14.4092
	11.2762	15.6156	14.6366	12.634	10.743	13.6653	14.6422	14.5064
	11.7452	17.2689	14.9782	12.902	10.7788	15.161	14.8094	14.7235
	12.1268	18.4235	15.8137	13.1933	11.3802	15.5386	15.4164	15.2105
	12.1587	18.739	16.0163	13.3243	11.5238	15.9791	16.1672	15.2382
	12.527	18.7749	16.2175	13.5098	12.433	17.3996	16.2882	15.6947
	12.9413	19.2573	16.4634	13.5441	12.5301	18.1935	16.6339	15.892
	13.1523	19.3089	16.9802	14.182	12.7291	18.8388	16.6837	16.3483
	13.2002	19.4378	17.8963	14.2199	13.8274	18.9746	16.8332	16.8649
	13.2968	19.4944	18.1069	14.338	14.3658	19.3895	16.9963	16.9337
	13.3526	19.515	18.1496	15.392	14.4287	19.5872	17.2941	17.0313
	13.4334	19.5288	18.3995	16.1439	14.7019	20.0022	17.3047	17.1961
	13.7695	19.6035	18.9059	16.5054	14.9076	20.5737	17.8768	17.6367
	13.8011	19.9512	18.9369	16.879	15.1671	20.6719	18.1081	18.1569
		20.7171	19.7503	17.2951	15.1816	21.4333	18.3127	18.2143
		20.8825	20.0762	17.3272	15.1889	21.7018	18.3497	18.6526
		21.0011	20.5224	17.8536	15.3287	21.963	18.4285	18.7121
		21.2581	21.2656	17.992	15.3925	23.8869	18.4754	18.8854
		21.6472	22.0174	18.2193	15.7135	24.4793	18.6025	18.911
		21.8037	22.6988	18.3801	16.1147	24.9068	18.6296	18.9614
		22.0801	22.9208	18.4116	16.1999	25.8199	18.6409	19.6312
		22.6414	23.082	18.5766	16.7524	25.8563	18.8467	19.7095
		22.78	23.1845	18.9032	16.8604	26.6995	18.9658	19.7647
		22.9084	23.4995	19.1294	17.4873	26.7445	19.3704	19.9494
		22.9718	23.8744	19.7182	17.9031	27.639	19.5236	20.0488
		23.2294	24.3028	19.7383	17.9192	27.9059	19.5987	20.0705
		23.2725	24.3487	20.1092	18.062	28.4376	19.8041	20.2062
		23.5858	25.3177	20.3848	18.2883	28.7928	19.9249	20.3075
		23.958	25.3313	20.5024	18.5902	28.8984	19.9985	20.6106
		23.9844	25.4498	20.9836	18.5966	28.9867	20.3019	20.8994
		24.3053	25.7671	21.0902	18.8595	29.185	20.6035	21.0275
		24.5836	25.9545	21.0929	19.894	29.1925	20.7844	21.0441
		24.6044	26.237	21.1555	19.9225	29.2745	20.7861	21.3427
		24.6455	26.2459	21.17	20.006	29.4765	20.939	21.4095
		24.6793	26.2517	21.4017	20.6924	30.5377	21.3512	21.8979
		25.0899	26.3846	21.4407	20.9762	30.5484	21.4536	22.0224
		25.4336	26.3957	21.5658	21.0799	31.0565	21.5032	22.1252
		25.6018	26.5408	21.7339	21.1374	31.4731	21.5398	22.1943
		25.7449	26.9411	21.7646	21.2269	31.6603	21.6538	22.2342
		25.8388	26.9909	21.9795	21.2897	31.6896	21.6896	22.331
		26.0126	27.3611	22.005	21.6973	32.2379	21.7032	22.5417
		26.0802	27.4749	22.2118	22.0748	33.7081	21.7356	22.8162
		26.5419	27.5198	22.8482	22.8121	33.878	22.1165	22.8254
		27.0813	27.6394	22.9458	23.0081	34.1203	22.8295	23.2712
		27.1174	27.6563	22.9796	23.1056	34.3461	23.1363	23.4775
		27.2085	28.0536	23.0435	24.0226	35.1593	23.2775	23.5194
		27.2631	28.3451	23.332	24.1644	37.0956	23.4198	23.6136
		28.0044	28.6684	23.8877	24.1944	37.6465	23.5774	23.8271
		28.4386	28.9318	24.0279	24.417	41.5582	23.7896	24.0541
		28.5532	28.9327	24.2161	24.5796	42.2258	23.8085	24.2422
		29.2095	29.0687	24.8466	24.9965	43.4746	24.0789	24.3098
		29.4244	29.5036	24.9392	25.058	45.2267	24.2763	24.436
		29.613	29.6089	25.2358	25.1214	45.7787	24.3213	24.7284
		29.6425	29.6465	25.3951	25.5872	46.2919	24.5672	24.7693
		30.4092	29.73	25.5739	26.1323	51.7823	25.3186	24.8118
		30.6213	31.296	25.7982	26.4069	53.2895	25.4712	24.8366
		30.8907	31.3684	26.1239	27.3308	57.7904	25.8498	25.0064
		31.3634	32.5959	26.3323	27.9772	64.6146	25.9492	25.0535
		31.6513	33.5374	26.6424	28.3306		25.9724	25.3754
		31.7002	33.6371	26.6434	28.8523		26.2375	25.5316
		32.0244	34.9122	26.6604	28.8741		26.3436	25.7174
		32.2929	35.0789	26.7731	29.0141		26.487	26.0521
		32.3642	35.4546	26.918	29.2816		26.8818	26.1705
		32.4212	35.4577	26.933	29.4925		27.3362	26.4133
		32.6664	36.2297	27.6228	29.5881		27.3408	26.9059
		33.1776	39.5975	27.9861	30.0287		27.4862	27.161
		33.8844	40.1247	28.8091	30.4569		27.5138	27.264
		34.0078	41.0072	29.1566	30.7132		27.7062	27.358
		34.0213	42.053	29.1836	31.0818		27.9704	27.4573
		34.088	43.9833	29.3381	31.3691		28.0171	27.6932
		34.1647	44.6122	29.4699	31.4047		28.4861	28.0534
		34.7108	45.5679	29.6099	31.4295		28.5026	28.4519
		35.0483	51.6611	29.8935	32.9631		28.8012	28.5119
		35.05	51.8429	30.0745	33.0361		29.1758	29.0611
		35.5718	55.8202	30.1118	33.0733		29.2443	29.2863
		35.7514	57.0005	30.3573	33.5758		29.5376	29.655
		36.7051	57.4985	31.2947	33.7383		29.5425	30.9206
		36.7299	57.8093	31.4496	33.7894		29.7197	31.3682
		37.0626	59.7618	31.6025	34.0395		30.1746	32.5402
		37.5276	92.9678	31.9359	34.4281		30.4627	32.6801
		37.963		32.0262	34.5277		30.9305	33.5396
		38.1692		32.308	34.7888		32.3182	33.8767
		39.1121		32.3393	35.6313		32.4247	34.1212
		40.3808		32.5756	35.9838		32.9582	37.857
		41.2096		33.1777	36.9086		33.0883	37.9172
		43.5739		33.7023	37.7539		33.2933	38.6524
		43.5942		34.0629	38.1591		33.5742	40.6796
		43.9934		34.1839	39.7191		33.9299	41.9992
		44.7273		35.0514	40.9043		35.1789	42.6562
		45.672		35.6797	41.0638		36.2012	44.8352
		46.0491		35.7594	42.9609		36.6771	45.353
		46.3517		36.0927	44.3116		37.0967	45.574
		48.2705		36.1233	44.6979		37.2314	45.8045
		48.6699		36.7627	46.4106		38.2212	46.6188
		48.6915		37.5511	46.5928		38.2448	52.1343
		49.7595		37.878	47.7816		38.3585	53.0826
		51.5053		38.5496	49.2899		38.556	54.4992
		52.223		38.9747	53.8215		38.7389	58.4818
		52.2573		40.6184	57.0531		39.3627	60.6412
		56.7387		41.004	57.5565		40.3706	62.3029
		58.5656		41.1432	58.4966		42.0766	68.3904
		58.8449		41.324	73.4781		45.3227	81.2465
		68.6495		42.1931	74.2432		47.8412	98.4183
		78.7188		48.1879	79.3086		48.8922	112.088
		103.264		51.998	100.971		52.1454
				66.8311			57.0922
				67.5244			57.5966
				81.947			58.3035
							63.2716
							70.1317
							74.1878
							78.9297
							79.9295
							88.3409

## Sheet: bilan
	Autofluo	Non irradiated	1x2Gy PTV	1x2Gy margin from -5 to 20 mm	1x2Gy margin from 22 to 47 mm	5x2Gy PTV	5x2Gy margin from -5 to 20 mm	5x2Gy margin from 22 to 47 mm
Moyenne	11.4253	31.0318	28.1933	25.904	27.2596	27.3633	28.3037	28.0765
Ecart type	1.99108	14.1541	13.7917	11.8605	15.9688	12.2158	14.7234	16.6051
Median	11.7452	28.2215	26.3846	24.2161	24.3057	27.639	24.3213	23.8271

## Sheet: racap - autoF
	Autofluo	Non irradiated	1x2Gy PTV	1x2Gy margin from -5 to 20 mm	1x2Gy margin from 22 to 47 mm	5x2Gy PTV	5x2Gy margin from -5 to 20 mm	5x2Gy margin from 22 to 47 mm
	0	0	0	0	0	0	0	0
	0	0	0	0	0	0	0	0
	0	0	0	0	0	0	0	0
	0	1.42272	0	0	0	0	0.279903	0
	0	1.9	0	0	0	0	0.719248	0
	0	2.04696	0	0	0	0.0932696	0.969926	0
	0	2.12154	1.81646	0	0	0.264075	1.78946	0.0318847
	0	3.73209	2.0039	0	0	0.545151	1.82352	1.2162
	0	3.85389	2.7453	0.677039	0	1.40218	1.9916	2.13719
	0	4.18095	2.93879	1.03373	0	1.44732	3.11781	2.98921
	0	4.19563	3.21659	1.21395	0	2.24535	3.22222	3.0864
	0	5.84891	3.55825	1.482	0	3.74098	3.38943	3.30352
	0	7.00346	4.39374	1.77335	0	4.11862	3.9964	3.79053
	0	7.31895	4.5963	1.90427	0.103758	4.55913	4.7472	3.81823
	0	7.35491	4.79748	2.08984	1.01297	5.97961	4.86816	4.2747
	0	7.83734	5.04342	2.12408	1.1101	6.77352	5.21394	4.47202
	0	7.88893	5.5602	2.762	1.3091	7.41876	5.26373	4.92829
	0	8.01781	6.47633	2.79985	2.40742	7.55458	5.41324	5.4449
	0	8.07442	6.68694	2.91795	2.94577	7.96954	5.5763	5.51365
	0	8.09498	6.72955	3.97195	3.00874	8.16721	5.87408	5.61129
	0	8.10884	6.97951	4.72394	3.28189	8.58217	5.88474	5.77609
	0	8.18353	7.48594	5.08542	3.4876	9.15368	6.45676	6.21671
	0	8.53121	7.51691	5.45901	3.74707	9.25188	6.6881	6.73689
	0	9.29706	8.33026	5.87512	3.76158	10.0133	6.89272	6.79432
	0	9.46251	8.65625	5.90718	3.76894	10.2818	6.92967	7.23257
	0	9.58108	9.10237	6.43365	3.90866	10.543	7.00853	7.29207
	0	9.83815	9.84559	6.57203	3.97255	12.4669	7.05543	7.46541
	0	10.2272	10.5974	6.79928	4.29345	13.0593	7.18249	7.49101
	0	10.3837	11.2788	6.9601	4.69469	13.4868	7.20963	7.54137
	0	10.6601	11.5008	6.99164	4.77992	14.3999	7.22087	8.21124
	0	11.2214	11.662	7.15664	5.33244	14.4363	7.42669	8.28948
	0	11.36	11.7645	7.48316	5.44044	15.2795	7.54585	8.34473
	0	11.4884	12.0795	7.70936	6.06735	15.3245	7.95043	8.52939
	0	11.5518	12.4544	8.29819	6.48314	16.219	8.1036	8.62883
	0	11.8094	12.8828	8.31826	6.49921	16.4859	8.17869	8.65054
	0	11.8525	12.9287	8.68917	6.64199	17.0176	8.38411	8.78618
	0	12.1658	13.8977	8.96483	6.86827	17.3728	8.50493	8.8875
	0	12.538	13.9113	9.08243	7.17019	17.4784	8.57849	9.19058
	0	12.5644	14.0298	9.56358	7.17656	17.5667	8.88186	9.47937
	0	12.8853	14.3471	9.67024	7.43955	17.765	9.18348	9.60753
	0	13.1636	14.5345	9.67285	8.47403	17.7725	9.36444	9.62405
	0	13.1844	14.817	9.73546	8.50249	17.8545	9.36611	9.92266
	0	13.2255	14.8259	9.74999	8.58603	18.0565	9.51905	9.98954
	0	13.2593	14.8317	9.98173	9.27244	19.1177	9.93115	10.4779
	0	13.6699	14.9646	10.0207	9.55622	19.1284	10.0336	10.6024
	0	14.0136	14.9757	10.1458	9.65993	19.6365	10.0832	10.7052
	0	14.1818	15.1208	10.3139	9.71738	20.0531	10.1198	10.7743
	0	14.3249	15.5211	10.3446	9.80686	20.2403	10.2338	10.8142
	0	14.4188	15.5709	10.5595	9.86971	20.2696	10.2696	10.911
	0	14.5926	15.9411	10.585	10.2773	20.8179	10.2832	11.1217
	0	14.6602	16.0549	10.7918	10.6548	22.2881	10.3156	11.3962
	0	15.1219	16.0998	11.4282	11.3921	22.458	10.6965	11.4054
	0	15.6613	16.2194	11.5258	11.5881	22.7003	11.4095	11.8512
	0	15.6974	16.2363	11.5596	11.6856	22.9261	11.7163	12.0575
	0	15.7885	16.6336	11.6235	12.6026	23.7393	11.8575	12.0994
	0	15.8431	16.9251	11.912	12.7444	25.6756	11.9998	12.1936
	0	16.5844	17.2484	12.4677	12.7744	26.2265	12.1574	12.4071
	0	17.0186	17.5118	12.6079	12.997	30.1382	12.3696	12.6341
	0	17.1332	17.5127	12.7961	13.1596	30.8058	12.3885	12.8222
	0	17.7895	17.6487	13.4266	13.5765	32.0546	12.6589	12.8898
	0	18.0044	18.0836	13.5192	13.638	33.8067	12.8563	13.016
	0	18.193	18.1889	13.8158	13.7014	34.3587	12.9013	13.3084
	0	18.2225	18.2265	13.9751	14.1672	34.8719	13.1472	13.3493
	0	18.9892	18.31	14.1539	14.7123	40.3623	13.8986	13.3918
	0	19.2013	19.876	14.3782	14.9869	41.8695	14.0512	13.4166
	0	19.4707	19.9484	14.7039	15.9108	46.3704	14.4298	13.5864
	0	19.9434	21.1759	14.9123	16.5572	53.1946	14.5292	13.6335
	0	20.2313	22.1174	15.2224	16.9106		14.5524	13.9554
	0	20.2802	22.2171	15.2234	17.4323		14.8175	14.1116
	0	20.6044	23.4922	15.2404	17.4541		14.9236	14.2974
	0	20.8729	23.6589	15.3531	17.5941		15.067	14.6321
	0	20.9442	24.0346	15.498	17.8616		15.4618	14.7505
	0	21.0012	24.0377	15.513	18.0725		15.9162	14.9933
	0	21.2464	24.8097	16.2028	18.1681		15.9208	15.4859
	0	21.7576	28.1775	16.5661	18.6087		16.0662	15.741
	0	22.4644	28.7047	17.3891	19.0369		16.0938	15.844
	0	22.5878	29.5872	17.7366	19.2932		16.2862	15.938
	0	22.6013	30.633	17.7636	19.6618		16.5504	16.0373
	0	22.668	32.5633	17.9181	19.9491		16.5971	16.2732
	0	22.7447	33.1922	18.0499	19.9847		17.0661	16.6334
	0	23.2908	34.1479	18.1899	20.0095		17.0826	17.0319
	0	23.6283	40.2411	18.4735	21.5431		17.3812	17.0919
	0	23.63	40.4229	18.6545	21.6161		17.7558	17.6411
	0	24.3314	44.4002	18.6918	21.6533		17.8243	17.8663
	0	25.3099	45.5805	18.9373	22.1558		18.1176	18.235
	0	26.1076	46.0785	19.8747	22.3183		18.1225	19.5006
	0	26.7492	46.3893	20.0296	22.3694		18.2997	19.9482
	0	28.9608	48.3418	20.1825	22.6195		18.7546	21.1202
	0	32.1539	81.5478	20.5159	23.0081		19.0427	21.2601
	0	32.5734		20.6062	23.1077		19.5105	22.1196
	0	34.252		20.888	23.3688		20.8982	22.4567
	0	34.9317		20.9193	24.2113		21.0047	22.7012
	0	37.2499		21.1556	24.5638		21.5382	26.437
	0	38.3395		21.7577	25.4886		21.6683	26.4972
	0	40.803		22.2823	26.3339		21.8733	27.2324
	0	45.3187		22.6429	26.7391		22.1542	29.2596
	0	47.4249		22.7639	28.2991		22.5099	30.5792
	0	67.2988		23.6314	29.4843		23.7589	31.2362
	0			24.2597	29.6438		24.7812	33.4152
	0			24.3394	31.5409		25.2571	33.933
	0			24.6727	32.8916		25.6767	34.154
	0			24.7033	33.2779		25.8114	34.3845
	0			25.3427	34.9906		26.8012	35.1988
	0			26.1311	35.1728		26.8248	40.7143
	0			26.458	36.3616		26.9385	41.6626
	0			27.1296	37.8699		27.136	43.0792
	0			27.5547	42.4015		27.3189	47.0618
	0			29.1984	45.6331		27.9427	49.2212
	0			29.584	46.1365		28.9506	50.8829
	0			29.7232	47.0766		30.6566	56.9704
	0			29.904	62.0581		33.9027	69.8265
	0			30.7731	62.8232		36.4212	86.9983
	0			36.7679	67.8886		37.4722	100.668
	0			40.578	89.5513		40.7254
	0			55.4111			45.6722
	0			56.1044			46.1766
	0			70.527			46.8835
	0						51.8516
	0						58.7117
	0						62.7678
	0						67.5097
	0						68.5095
	0						76.9209
	0
	0

## Sheet: bilan- autoF
	Autofluo	Non irradiated	1x2Gy PTV	1x2Gy margin from -5 to 20 mm	1x2Gy margin from 22 to 47 mm	5x2Gy PTV	5x2Gy margin from -5 to 20 mm	5x2Gy margin from 22 to 47 mm
Moyenne	0	16.6155	16.9572	14.6516	16.1537	16.0486	16.9297	16.7721
Ecart type	0	11.0679	13.5395	11.6281	15.6069	12.0664	14.6668	16.4762
Median	0	14.5057	14.9646	12.7961	12.8857	16.219	12.9013	12.4071

## Sheet: racap - autoF+20
	Autofluo	Non irradiated	1x2Gy PTV	1x2Gy margin from -5 to 20 mm	1x2Gy margin from 22 to 47 mm	5x2Gy PTV	5x2Gy margin from -5 to 20 mm	5x2Gy margin from 22 to 47 mm
	0	0	0	0	0	0	0	0
	0	0	0	0	0	0	0	0
	0	0	0	0	0	0	0	0
	0	0	0	0	0	0	0	0
	0	0	0	0	0	0	0	0
	0	0	0	0	0	0	0	0
	0	0	0	0	0	0	0	0
	0	0	0	0	0	0	0	0
	0	0	0	0	0	0	0	0
	0	0	0	0	0	0	0	0
	0	0	0	0	0	0	0	0
	0	0	0	0	0	0	0	0
	0	0	0	0	0	0	0	0
	0	0	0	0	0	0	0	0
	0	0	0	0	0	0	0	0
	0	0	0	0	0	0	0	0
	0	0	0	0	0	0	0	0
	0	0	0	0	0	0	0	0
	0	0	0	0	0	0	0	0
	0	0	0	0	0	0	0	0
	0	0	0	0	0	0	0	0
	0	0	0	0	0	0	0	0
	0	0	0	0	0	0	0	0
	0	0	0	0	0	0	0	0
	0	0	0	0	0	0	0	0
	0	0	0	0	0	0	0	0
	0	0	0	0	0	0	0	0
	0	0	0	0	0	0	0	0
	0	0	0	0	0	0	0	0
	0	0	0	0	0	0	0	0
	0	0	0	0	0	0	0	0
	0	0	0	0	0	0	0	0
	0	0	0	0	0	0	0	0
	0	0	0	0	0	0	0	0
	0	0	0	0	0	0	0	0
	0	0	0	0	0	0	0	0
	0	0	0	0	0	0	0	0
	0	0	0	0	0	0	0	0
	0	0	0	0	0	0	0	0
	0	0	0	0	0	0	0	0
	0	0	0	0	0	0	0	0
	0	0	0	0	0	0	0	0
	0	0	0	0	0	0	0	0
	0	0	0	0	0	0	0	0
	0	0	0	0	0	0	0	0
	0	0	0	0	0	0	0	0
	0	0	0	0	0	1	0	0
	0	0	0	0	0	1	0	0
	0	0	0	0	0	1	0	0
	0	0	0	0	0	1	0	0
	0	0	0	0	0	1	0	0
	0	0	0	0	0	1	0	0
	0	0	0	0	0	1	0	0
	0	0	0	0	0	1	0	0
	0	0	0	0	0	1	0	0
	0	0	0	0	0	1	0	0
	0	0	0	0	0	1	0	0
	0	0	0	0	0	1	0	0
	0	0	0	0	0	1	0	0
	0	0	0	0	0	1	0	0
	0	0	0	0	0	1	0	0
	0	0	0	0	0	1	0	0
	0	0	0	0	0	1	0	0
	0	0	0	0	0	1	0	0
	0	0	0	0	0	1	0	0
	0	0	0	0	0	1	0	0
	0	0	1	0	0	1	0	0
	0	1	1	0	0		0	0
	0	1	1	0	0		0	0
	0	1	1	0	0		0	0
	0	1	1	0	0		0	0
	0	1	1	0	0		0	0
	0	1	1	0	0		0	0
	0	1	1	0	0		0	0
	0	1	1	0	0		0	0
	0	1	1	0	0		0	0
	0	1	1	0	0		0	0
	0	1	1	0	0		0	0
	0	1	1	0	0		0	0
	0	1	1	0	0		0	0
	0	1	1	0	1		0	0
	0	1	1	0	1		0	0
	0	1	1	0	1		0	0
	0	1	1	0	1		0	0
	0	1	1	0	1		0	0
	0	1	1	0	1		0	0
	0	1	1	1	1		0	0
	0	1	1	1	1		0	1
	0	1	1	1	1		0	1
	0	1		1	1		0	1
	0	1		1	1		1	1
	0	1		1	1		1	1
	0	1		1	1		1	1
	0	1		1	1		1	1
	0	1		1	1		1	1
	0	1		1	1		1	1
	0	1		1	1		1	1
	0	1		1	1		1	1
	0			1	1		1	1
	0			1	1		1	1
	0			1	1		1	1
	0			1	1		1	1
	0			1	1		1	1
	0			1	1		1	1
	0			1	1		1	1
	0			1	1		1	1
	0			1	1		1	1
	0			1	1		1	1
	0			1	1		1	1
	0			1	1		1	1
	0			1	1		1	1
	0			1	1		1	1
	0			1	1		1	1
	0			1	1		1
	0			1			1
	0			1			1
	0			1			1
	0						1
	0						1
	0						1
	0						1
	0						1
	0						1
	0
	0

## Sheet: bilan autoF + 20
Autofluo	Non irradiated	1x2Gy PTV	1x2Gy margin from -5 to 20 mm	1x2Gy margin from 22 to 47 mm	5x2Gy PTV	5x2Gy margin from -5 to 20 mm	5x2Gy margin from 22 to 47 mm
0	31	23	31	34	21	33	26
	99	90	118	115	68	124	114
	31.3131	25.5556	26.2712	29.5652	30.8824	26.6129	22.807

## Sheet: racap - autoF 30
	Autofluo	Non irradiated	1x2Gy PTV	1x2Gy margin from -5 to 20 mm	1x2Gy margin from 22 to 47 mm	5x2Gy PTV	5x2Gy margin from -5 to 20 mm	5x2Gy margin from 22 to 47 mm
	0	0	0	0	0	0	0	0
	0	0	0	0	0	0	0	0
	0	0	0	0	0	0	0	0
	0	0	0	0	0	0	0	0
	0	0	0	0	0	0	0	0
	0	0	0	0	0	0	0	0
	0	0	0	0	0	0	0	0
	0	0	0	0	0	0	0	0
	0	0	0	0	0	0	0	0
	0	0	0	0	0	0	0	0
	0	0	0	0	0	0	0	0
	0	0	0	0	0	0	0	0
	0	0	0	0	0	0	0	0
	0	0	0	0	0	0	0	0
	0	0	0	0	0	0	0	0
	0	0	0	0	0	0	0	0
	0	0	0	0	0	0	0	0
	0	0	0	0	0	0	0	0
	0	0	0	0	0	0	0	0
	0	0	0	0	0	0	0	0
	0	0	0	0	0	0	0	0
	0	0	0	0	0	0	0	0
	0	0	0	0	0	0	0	0
	0	0	0	0	0	0	0	0
	0	0	0	0	0	0	0	0
	0	0	0	0	0	0	0	0
	0	0	0	0	0	0	0	0
	0	0	0	0	0	0	0	0
	0	0	0	0	0	0	0	0
	0	0	0	0	0	0	0	0
	0	0	0	0	0	0	0	0
	0	0	0	0	0	0	0	0
	0	0	0	0	0	0	0	0
	0	0	0	0	0	0	0	0
	0	0	0	0	0	0	0	0
	0	0	0	0	0	0	0	0
	0	0	0	0	0	0	0	0
	0	0	0	0	0	0	0	0
	0	0	0	0	0	0	0	0
	0	0	0	0	0	0	0	0
	0	0	0	0	0	0	0	0
	0	0	0	0	0	0	0	0
	0	0	0	0	0	0	0	0
	0	0	0	0	0	0	0	0
	0	0	0	0	0	0	0	0
	0	0	0	0	0	0	0	0
	0	0	0	0	0	0	0	0
	0	0	0	0	0	0	0	0
	0	0	0	0	0	0	0	0
	0	0	0	0	0	0	0	0
	0	0	0	0	0	0	0	0
	0	0	0	0	0	0	0	0
	0	0	0	0	0	0	0	0
	0	0	0	0	0	0	0	0
	0	0	0	0	0	0	0	0
	0	0	0	0	0	0	0	0
	0	0	0	0	0	0	0	0
	0	0	0	0	0	1	0	0
	0	0	0	0	0	1	0	0
	0	0	0	0	0	1	0	0
	0	0	0	0	0	1	0	0
	0	0	0	0	0	1	0	0
	0	0	0	0	0	1	0	0
	0	0	0	0	0	1	0	0
	0	0	0	0	0	1	0	0
	0	0	0	0	0	1	0	0
	0	0	0	0	0	1	0	0
	0	0	0	0	0		0	0
	0	0	0	0	0		0	0
	0	0	0	0	0		0	0
	0	0	0	0	0		0	0
	0	0	0	0	0		0	0
	0	0	0	0	0		0	0
	0	0	0	0	0		0	0
	0	0	0	0	0		0	0
	0	0	0	0	0		0	0
	0	0	0	0	0		0	0
	0	0	1	0	0		0	0
	0	0	1	0	0		0	0
	0	0	1	0	0		0	0
	0	0	1	0	0		0	0
	0	0	1	0	0		0	0
	0	0	1	0	0		0	0
	0	0	1	0	0		0	0
	0	0	1	0	0		0	0
	0	0	1	0	0		0	0
	0	0	1	0	0		0	0
	0	0	1	0	0		0	0
	0	1	1	0	0		0	0
	0	1		0	0		0	0
	0	1		0	0		0	0
	0	1		0	0		0	0
	0	1		0	0		0	0
	0	1		0	0		0	0
	0	1		0	0		0	0
	0	1		0	0		0	0
	0	1		0	0		0	1
	0	1		0	0		0	1
	0			0	0		0	1
	0			0	1		0	1
	0			0	1		0	1
	0			0	1		0	1
	0			0	1		0	1
	0			0	1		0	1
	0			0	1		0	1
	0			0	1		0	1
	0			0	1		0	1
	0			0	1		0	1
	0			0	1		0	1
	0			0	1		1	1
	0			0	1		1	1
	0			1	1		1	1
	0			1	1		1	1
	0			1	1		1
	0			1			1
	0			1			1
	0			1			1
	0						1
	0						1
	0						1
	0						1
	0						1
	0						1
	0
	0

## Sheet: bilan autoF + 30
Autofluo	Non irradiated	1x2Gy PTV	1x2Gy margin from -5 to 20 mm	1x2Gy margin from 22 to 47 mm	5x2Gy PTV	5x2Gy margin from -5 to 20 mm	5x2Gy margin from 22 to 47 mm
0	10	12	6	15	10	14	17
	99	90	118	115	68	124	114
	10.101	13.3333	5.08475	13.0435	14.7059	11.2903	14.9123

## Sheet: racap - autoF 35
	Autofluo	Non irradiated	1x2Gy PTV	1x2Gy margin from -5 to 20 mm	1x2Gy margin from 22 to 47 mm	5x2Gy PTV	5x2Gy margin from -5 to 20 mm	5x2Gy margin from 22 to 47 mm
	0	0	0	0	0	0	0	0
	0	0	0	0	0	0	0	0
	0	0	0	0	0	0	0	0
	0	0	0	0	0	0	0	0
	0	0	0	0	0	0	0	0
	0	0	0	0	0	0	0	0
	0	0	0	0	0	0	0	0
	0	0	0	0	0	0	0	0
	0	0	0	0	0	0	0	0
	0	0	0	0	0	0	0	0
	0	0	0	0	0	0	0	0
	0	0	0	0	0	0	0	0
	0	0	0	0	0	0	0	0
	0	0	0	0	0	0	0	0
	0	0	0	0	0	0	0	0
	0	0	0	0	0	0	0	0
	0	0	0	0	0	0	0	0
	0	0	0	0	0	0	0	0
	0	0	0	0	0	0	0	0
	0	0	0	0	0	0	0	0
	0	0	0	0	0	0	0	0
	0	0	0	0	0	0	0	0
	0	0	0	0	0	0	0	0
	0	0	0	0	0	0	0	0
	0	0	0	0	0	0	0	0
	0	0	0	0	0	0	0	0
	0	0	0	0	0	0	0	0
	0	0	0	0	0	0	0	0
	0	0	0	0	0	0	0	0
	0	0	0	0	0	0	0	0
	0	0	0	0	0	0	0	0
	0	0	0	0	0	0	0	0
	0	0	0	0	0	0	0	0
	0	0	0	0	0	0	0	0
	0	0	0	0	0	0	0	0
	0	0	0	0	0	0	0	0
	0	0	0	0	0	0	0	0
	0	0	0	0	0	0	0	0
	0	0	0	0	0	0	0	0
	0	0	0	0	0	0	0	0
	0	0	0	0	0	0	0	0
	0	0	0	0	0	0	0	0
	0	0	0	0	0	0	0	0
	0	0	0	0	0	0	0	0
	0	0	0	0	0	0	0	0
	0	0	0	0	0	0	0	0
	0	0	0	0	0	0	0	0
	0	0	0	0	0	0	0	0
	0	0	0	0	0	0	0	0
	0	0	0	0	0	0	0	0
	0	0	0	0	0	0	0	0
	0	0	0	0	0	0	0	0
	0	0	0	0	0	0	0	0
	0	0	0	0	0	0	0	0
	0	0	0	0	0	0	0	0
	0	0	0	0	0	0	0	0
	0	0	0	0	0	0	0	0
	0	0	0	0	0	0	0	0
	0	0	0	0	0	0	0	0
	0	0	0	0	0	0	0	0
	0	0	0	0	0	0	0	0
	0	0	0	0	0	0	0	0
	0	0	0	0	0	0	0	0
	0	0	0	0	0	1	0	0
	0	0	0	0	0	1	0	0
	0	0	0	0	0	1	0	0
	0	0	0	0	0	1	0	0
	0	0	0	0	0		0	0
	0	0	0	0	0		0	0
	0	0	0	0	0		0	0
	0	0	0	0	0		0	0
	0	0	0	0	0		0	0
	0	0	0	0	0		0	0
	0	0	0	0	0		0	0
	0	0	0	0	0		0	0
	0	0	0	0	0		0	0
	0	0	0	0	0		0	0
	0	0	0	0	0		0	0
	0	0	0	0	0		0	0
	0	0	0	0	0		0	0
	0	0	0	0	0		0	0
	0	0	1	0	0		0	0
	0	0	1	0	0		0	0
	0	0	1	0	0		0	0
	0	0	1	0	0		0	0
	0	0	1	0	0		0	0
	0	0	1	0	0		0	0
	0	0	1	0	0		0	0
	0	0	1	0	0		0	0
	0	0		0	0		0	0
	0	0		0	0		0	0
	0	0		0	0		0	0
	0	1		0	0		0	0
	0	1		0	0		0	0
	0	1		0	0		0	0
	0	1		0	0		0	0
	0	1		0	0		0	0
	0	1		0	0		0	0
	0			0	0		0	0
	0			0	0		0	0
	0			0	0		0	0
	0			0	0		0	0
	0			0	0		0	1
	0			0	1		0	1
	0			0	1		0	1
	0			0	1		0	1
	0			0	1		0	1
	0			0	1		0	1
	0			0	1		0	1
	0			0	1		0	1
	0			0	1		0	1
	0			0	1		1	1
	0			1	1		1	1
	0			1	1		1
	0			1			1
	0			1			1
	0			1			1
	0						1
	0						1
	0						1
	0						1
	0						1
	0						1
	0
	0

## Sheet: bilan autoF + 35
Autofluo	Non irradiated	1x2Gy PTV	1x2Gy margin from -5 to 20 mm	1x2Gy margin from 22 to 47 mm	5x2Gy PTV	5x2Gy margin from -5 to 20 mm	5x2Gy margin from 22 to 47 mm
0	6	8	5	11	4	12	11
	99	90	118	115	68	124	114
	6.06061	8.88889	4.23729	9.56522	5.88235	9.67742	9.64912

[truncated: 3 more sheets: racap - 40, bilan autoF 40, Feuil1]
