# Supplementary material for: The out-of-field dose in radiation therapy induces delayed tumorigenesis by senescence evasion
Source: eLife. 2022 Mar 18;11:e67190. doi: 10.7554/eLife.67190 (PMC8933005; doi:10.7554/eLife.67190)
Supplement: Figure 2—figure supplement 5—source data 1. [file elife-67190-fig2-figsupp5-data1.xlsx]

## Sheet: BILAN
Figure 2 – Figure Supplement 5-source data 1
	NI	PTV	Margin -5 to 20 mm	Margin 22 to 47 mm
sample 1	5	11	15	7
sample 2	4	2	10	12
sample 3	7	13	8	14
percent of polynucleated cells	5.33333	8.66667	11	11
SD	1.52753	5.85947	3.60555	3.60555
t test		0.197174	0.0331518	0.0331518
							NI	PTV	Margin -5 to 20 mm	Margin 22 to 47 mm
						percent of polynucleated cells	5.33333	8.66667	11	11

## Sheet: 10 x 2 PAR NI
0	4	cellules polynuclées	cellules total	% de cellules polynuclées
1	5	6	114	0.0526316
0	4
1	6
0	6
0	2
0	2
1	2
0	4
0	3
0	2
0	2
0	3
0	4
0	5
0	4
1	2
0	5
0	3
0	2
0	2
0	4
0	2
0	1
0	2
0	2
0	2
0	4
0	3
0	4
0	3
1	3
0	2
0	5
1	3
0	2

## Sheet: 10X2 PAR + H2O2 NI
2	4	cellules polynuclées	cellules total	% de cellules polynuclées
0	9	4	91	0.043956
0	8
1	10
0	8
0	12
0	5
1	5
0	6
0	4
0	3
0	5
0	4
0	4
0	2
0	2

## Sheet: 10 x 2 Gy PNKP NI
1	4	cellules polynuclées	cellules total	% de cellules polynuclées
0	3	8	110	0.0727273
1	4
0	4
0	2
0	4
1	6
0	8
0	5
0	5
0	7
1	9
0	4
1	4
0	4
0	3
0	3
0	2
0	7
0	5
0	6
0	4
1	3
1	3
1	1

## Sheet: 10X2 PAR O
0	2	cellules polynuclées	cellules total	% de cellules polynuclées
0	3	11	149	0.0738255
0	3
0	2
1	6
0	5
0	2
0	5
0	3
0	3
1	3
0	3
2	4
0	6
0	4
1	2
0	5
1	5
0	1
0	3
0	2
0	2
0	3
0	2
1	2
0	1
0	2
0	3
0	3
0	3
0	4
0	1
2	2
0	2
0	3
0	4
0	2
0	4
0	4
1	2
0	2
0	2
0	2
0	2
0	3
0	2
1	6
0	2
0	3
0	2
0	2

## Sheet: 10X2 PAR H2O2 O
0	3	cellules polynuclées	cellules total	% de cellules polynuclées
0	3	10	86	0.116279
1	1
0	4
0	3
1	4
1	2
0	1
0	4
0	4
0	2
1	2
1	5
0	2
1	5
1	2
0	4
1	3
0	2
0	4
0	3
1	2
1	2
0	4
0	2
0	4
0	4
0	1
0	4

## Sheet: 10X2 PNKP O
1	5	cellules polynuclées	cellules total	% de cellules polynuclées
0	3	11	81	0.135802
0	3
0	4
1	2
0	5
0	4
1	3
1	5
0	3
2	4
1	3
1	4
0	4
0	3
1	4
0	3
0	4
1	5
0	4
1	3
0	3

## Sheet: 10X2Gy PAR PTV 
0	1	cellules polynuclées	cellules total	% de cellules polynuclées
0	2	20	175	0.114286
0	1
0	1
0	2
0	2
0	3
0	2
0	1
0	3
0	1
1	3
0	3
0	3
0	1
0	2
0	2
0	1
0	3
0	2
0	1
1	1
0	2
0	2
0	3
0	1
1	4
0	3
1	3
0	3
0	2
0	1
0	1
0	4
0	3
0	2
0	3
0	3
0	2
1	3
2	3
0	3
0	4
0	1
1	3
0	3
1	2
0	2
1	1
0	2
1	2
1	2
1	2
0	1
0	2
0	3
0	2
1	3
0	1
0	1
0	3
0	2
0	2
0	1
0	2
0	3
0	2
0	2
0	3
0	3
1	2
0	2
0	1
0	1
0	2
1	2
0	1
1	1
0	1
1	1
1	2
0	3
0	1
0	1
1	1
0	1

## Sheet: 10 X 2 GY PAR H2O2 PTV
0	1	cellules polynuclées	cellules total	% de cellules polynuclées
0	1	1	57	0.0175439
0	2
0	2
0	3
0	3
0	3
0	3
0	3
1	2
0	2
0	3
0	2
0	3
0	2
0	2
0	2
0	2
0	2
0	2
0	3
0	2
0	2
0	3
0	2

## Sheet: 10 X 2 PNKP PTV
0	2	cellules polynuclées	cellules total	% de cellules polynuclées
0	3	12	96	0.125
2	3
0	4
0	3
1	3
0	4
1	6
0	4
1	4
1	4
0	3
1	4
0	4
1	3
1	3
0	3
1	4
0	3
0	4
0	5
0	4
1	4
1	3
0	3
0	3
0	3

[truncated: 3 more sheets: 10 X 2 PAR PN, 10 X 2 PNKP PN, 10X2 PAR H2O2 PN]
