# Supplementary material for: The out-of-field dose in radiation therapy induces delayed tumorigenesis by senescence evasion
Source: eLife. 2022 Mar 18;11:e67190. doi: 10.7554/eLife.67190 (PMC8933005; doi:10.7554/eLife.67190)
Supplement: Figure 2—source data 1. [file elife-67190-fig2-data1.xlsx]

## Sheet: titre
Manip de Maxime Tomezak du 22/07/2015
Analysée au cytomètre par Laure Saas
F1MC1 PD=25,8
Culture démarée le 17/07/2015
Cellules irradiées à 2*2Gy tous les jours sauf les week-ends
1ère irradiation le 20 07 2015
L'analyse au cytomètre est faite 24h après l'irradiation, ou 72h après (le lundi pour les cellules irradiées le vendredi)
Le protocole de marquage au C12FDG est dans le cahier de manip de Laure Saas
Pour comparaison, des F1MC1 en sénescence réplicative ont été analysés
à 57,2 PD lors de la première analyse (2*2Gy)
à 61,03 PD lors de l'analyse des 14*2Gy
D'après les résultats en taille et granularité, elles n'étaient vraiment sénescentes que lors des deux dernières mesure. Donc ne prendre en compte que la dernière mesure
	date	day	event1	event2
vendredi	2015-07-17	1	plating
samedi	2015-07-18	2
dimanche	2015-07-19	3
lundi	2015-07-20	4	1*2Gy
mardi	2015-07-21	5	2*2Gy
mercredi		6	3*2gy	cytometry 2*2Gy
jeudi		7	4*2gy
vendredi		8	5*2gy	cytometry 4*2gy
samedi		9
dimanche		10
lundi		11	6*2gy	cytometry 5*2gy
mardi		12	7*2gy
mercredi		13	8*2gy	cytometry 7*2gy
jeudi		14	9*2gy
vendredi		15	10*2gy	cytometry 9*2gy
samedi		16
dimanche		17
lundi		18	11*2gy	cytometry 10*2gy
mardi		19	12*2gy
mercredi		20	13*2gy	cytometry 12*2gy
jeudi		21	14*2gy
vendredi		22	15*2gy	cytometry 14*2gy
samedi		23
dimanche		24
lundi		25		cytometry 15*2gy

## Sheet: données brutes (2)
FITC mean de la population P1 qui correspond à la population totale moins les débris
On doit enlever l'autofluorescence (correspond aux valeurs indiquées -FDG)																																					Mesures avec le 15*2gy
	2*2gy				4*2gy				5*2gy				7*2gy				9*2gy				10*2gy				12*2gy				14*2gy				15*2gy				Rep Sen
		FITC mean	FITC mean - autofluo			FITC mean	FITC mean - autofluo			FITC mean	FITC mean - autofluo			FITC mean	FITC mean - autofluo			FITC mean	FITC mean - autofluo			FITC mean	FITC mean - autofluo			FITC mean	FITC mean - autofluo			FITC mean	FITC mean - autofluo			FITC mean	FITC mean - autofluo			FITC mean	FITC mean - autofluo
	NI-FDG1	7			NI-FDG1	7			NI-FDG1	5			NI-FDG1	6			NI-FDG1	6			NI-FDG1	6			NI-FDG1	6			NI-FDG1	7			NI-FDG1	6			FS-FDG1	26
	NI-FDG2	7			NI-FDG2	7			NI-FDG2	5			NI-FDG2	16			NI-FDG2	6			NI-FDG2	6			NI-FDG2	6			NI-FDG2	7			NI-FDG2	6			FS-FDG2	23
	NI-FDG3	7			NI-FDG3	7			NI-FDG3	5			NI-FDG3	7			NI-FDG3	6			NI-FDG3	6			NI-FDG3	6			NI-FDG3	7			NI-FDG3	6			FS-FDG3	24
	NI-FDG mean	7			NI-FDG mean	7			NI-FDG mean	5			NI-FDG mean	9.66667			NI-FDG mean	6			NI-FDG mean	6			NI-FDG mean	6			NI-FDG mean	7			NI-FDG mean	6			FS-FDG mean	24.3333
	NI+FDG1	832	825		NI+FDG1	1256	1249		NI+FDG1	1382	1377		NI+FDG1	936	926.333		NI+FDG1	1235	1229		NI+FDG1	1259	1253		NI+FDG1	1395	1389		NI+FDG1	1465	1458		NI+FDG1	1141	1135		FS+FDG1	4242	4217.67
	NI+FDG2	829	822		NI+FDG2	1238	1231		NI+FDG2	1299	1294		NI+FDG2	859	849.333		NI+FDG2	1206	1200		NI+FDG2	1165	1159		NI+FDG2	1291	1285		NI+FDG2	1424	1417		NI+FDG2	990	984		FS+FDG2	4017	3992.67
	NI+FDG3	891	884		NI+FDG3	1285	1278		NI+FDG3	1241	1236		NI+FDG3	843	833.333		NI+FDG3	1226	1220		NI+FDG3	1202	1196		NI+FDG3	1295	1289		NI+FDG3	1471	1464		NI+FDG3	1142	1136		FS+FDG3	3893	3868.67
	NI mean		843.667		NI mean		1252.67		NI mean		1302.33		NI mean		869.667		NI mean		1216.33		NI mean		1202.67		NI mean		1321		NI mean		1446.33		NI mean		1085		FS mean		4026.33
	NI SD		34.9619		NI SD		23.7136		NI SD		70.8684		NI SD		49.7226		NI SD		14.8436		NI SD		47.3533		NI SD		58.9237		NI SD		25.5799		NI SD		87.47		FS SD		176.919
																																					T-test		0.000152998
	PTV1	1167	1160		PTV1	2805	2798		PTV1	2932	2927		PTV1	1609	1599.33		PTV1	3435	3429		PTV1	2971	2965		PTV1	3248	3242		PTV1	3632	3625		PTV1	3264	3258				***
	PTV1	1233	1226		PTV1	2910	2903		PTV1	2728	2723		PTV1	2845	2835.33		PTV1	3681	3675		PTV1	3322	3316		PTV1	4164	4158		PTV1	3909	3902		PTV1	3458	3452
	PTV3	1377	1370		PTV3	2952	2945		PTV3	3143	3138		PTV3	4769	4759.33		PTV3	4359	4353		PTV3	3694	3688		PTV3	4751	4745		PTV3	3888	3881		PTV3	3458	3452
	PTV mean		1252		PTV mean		2882		PTV mean		2929.33		PTV mean		3064.67		PTV mean		3819		PTV mean		3323		PTV mean		4048.33		PTV mean		3802.67		PTV mean		3387.33
	PTV SD		107.387		PTV SD		75.7166		PTV SD		207.51		PTV SD		1592.43		PTV SD		478.535		PTV SD		361.551		PTV SD		757.478		PTV SD		154.222		PTV SD		112.006
	T-test		0.0150836		T-test		0.000259735		T-test		0.00256956		T-test		0.139483		T-test		0.0110237		T-test		0.00866831		T-test		0.0241862		T-test		0.00110067		T-test		1.5888e-05
			*				***				**				NS				*				***				*				**				***
	penombre1	994	987		penombre1	2183	2176		penombre1	2614	2609		penombre1	2831	2821.33		penombre1	2185	2179		penombre1	2369	2363		penombre1	3053	3047		penombre1	2991	2984		penombre1	3094	3088
	penombre2	1057	1050		penombre2	2104	2097		penombre2	2236	2231		penombre2	2396	2386.33		penombre2	2449	2443		penombre2	2258	2252		penombre2	2798	2792		penombre2	2933	2926		penombre2	3091	3085
	penombre3	1116	1109		penombre3	2085	2078		penombre3	2601	2596		penombre3	2804	2794.33		penombre3	1588	1582		penombre3	2287	2281		penombre3	2812	2806		penombre3	2693	2686		penombre3	3078	3072
	penombre mean		1048.67		penombre mean		2117		penombre mean		2478.67		penombre mean		2667.33		penombre mean		2068		penombre mean		2298.67		penombre mean		2881.67		penombre mean		2865.33		penombre mean		3081.67
	penombre SD		61.0109		penombre SD		51.9711		penombre SD		214.584		penombre SD		243.727		penombre SD		441.102		penombre SD		57.5702		penombre SD		143.354		penombre SD		157.992		penombre SD		8.5049
	T-test		0.0129428		T-test		0.000197117		T-test		0.00631818		T-test		0.00464205		T-test		0.0788049		T-test		1.92808e-05		T-test		0.000814161		T-test		0.0033926		T-test		0.000575644
			*				***				**				**				NS				***				***				**				***
	ombre1	829	822		ombre1	1497	1490		ombre1	1497	1492		ombre1	1839	1829.33		ombre1	1626	1620		ombre1	1563	1557		ombre1	2108	2102		ombre1	2078	2071		ombre1	1731	1725
	ombre2	994	987		ombre2	1428	1421		ombre2	1524	1519		ombre2	1801	1791.33		ombre2	1686	1680		ombre2	1677	1671		ombre2	1995	1989		ombre2	2096	2089		ombre2	1738	1732
	ombre3	977	970		ombre3	1561	1554		ombre3	1639	1634		ombre3	1732	1722.33		ombre3	1626	1620		ombre3	1898	1892		ombre3	2139	2133		ombre3	1876	1869		ombre3	1646	1640
	ombre mean		926.333		ombre mean		1488.33		ombre mean		1548.33		ombre mean		1781		ombre mean		1640		ombre mean		1706.67		ombre mean		2074.67		ombre mean		2009.67		ombre mean		1699
	ombre SD		90.7542		ombre SD		66.5157		ombre SD		75.4078		ombre SD		54.2433		ombre SD		34.641		ombre SD		170.324		ombre SD		75.7914		ombre SD		122.153		ombre SD		51.2152
	T-test		0.251311		T-test		0.0166877		T-test		0.0147584		T-test		2.96455e-05		T-test		0.000543075		T-test		0.0287299		T-test		0.000242293		T-test		0.0124917		T-test		0.00133221
			NS				*				*				***				***				*				***				*				**
			mean	sd
	Non irradiated	D6	843.667	34.9619
		D8	1252.67	23.7136
		D11	1302.33	70.8684
		D13	869.667	49.7226
		D15	1216.33	14.8436
		D18	1202.67	47.3533
		D20	1321	58.9237
		D22	1446.33	25.5799
		D25	1085	87.47
	PTV	D6_2x2Gy	1252	107.387	*
		D8_4x2Gy	2882	75.7166	***
		D11_5x2Gy	2929.33	207.51	**
		D13_7x2Gy	3064.67	1592.43	NS
		D15_9x2Gy	3819	478.535	*
		D18_10x2Gy	3323	361.551	***
		D20_12x2Gy	4048.33	757.478	*
		D22_14x2Gy	3802.67	154.222	**
		D25_15x2Gy	3387.33	112.006	***
	Margin -4 to +30mm	D6_2x2Gy	1048.67	61.0109	*
		D8_4x2Gy	2117	51.9711	***
		D11_5x2Gy	2478.67	214.584	**
		D13_7x2Gy	2667.33	243.727	**
		D15_9x2Gy	2068	441.102	NS
		D18_10x2Gy	2298.67	57.5702	***
		D20_12x2Gy	2881.67	143.354	***
		D22_14x2Gy	2865.33	157.992	**
		D25_15x2Gy	3081.67	8.5049	***
	Margin +35 to +70mm	D6_2x2Gy	926.333	90.7542	NS
		D8_4x2Gy	1488.33	66.5157	*
		D11_5x2Gy	1548.33	75.4078	*
		D13_7x2Gy	1781	54.2433	***
		D15_9x2Gy	1640	34.641	***
		D18_10x2Gy	1706.67	170.324	*
		D20_12x2Gy	2074.67	75.7914	***
		D22_14x2Gy	2009.67	122.153	*
		D25_15x2Gy	1699	51.2152	**
	Rep Sen		4026.33	176.919	***
