# Supplementary material for: The out-of-field dose in radiation therapy induces delayed tumorigenesis by senescence evasion
Source: eLife. 2022 Mar 18;11:e67190. doi: 10.7554/eLife.67190 (PMC8933005; doi:10.7554/eLife.67190)
Supplement: Figure 2—source data 2. [file elife-67190-fig2-data2.xlsx]

## Sheet: 29-07-2015 7x2Gy
Specimen Name	Tube Name	P1 FSC-A Mean	P1 SSC-A Mean	P4 FITC-A Mean	P2 FSC-A Mean	P2 SSC-A Mean	P3 FITC-A Mean	%P2
290715 7x2Gy	Ctl NI +FDG 1	57001	50453	665	136004	168103	3375	9.7
290715 7x2Gy	Ctl NI +FDG 2	54252	47003	648	133953	164552	3649	10.2
290715 7x2Gy	Ctl NI +FDG 3	55005	47398	639	136309	162972	3386	9.9
290715 7x2Gy	Ctl NI -FDG 1	57104	52518		130380	163178	150	7.1
290715 7x2Gy	Ctl NI -FDG 2	58359	53271	1778	132736	164504	3150	7.7
290715 7x2Gy	Ctl NI -FDG 3	57696	52155		132662	165318	165	8.6
290715 7x2Gy	Ctl+ FS +FDG 1	71762	80379	1984	125813	160956	3786	45.5
290715 7x2Gy	Ctl+ FS +FDG 2	68891	78383	1780	128293	162732	3582	42.9
290715 7x2Gy	Ctl+ FS +FDG 3	68902	78276	1722	124229	157448	3309	45.3
290715 7x2Gy	Ctl+ FS -FDG 1	69045	78832	851	132060	161650	185	51.3
290715 7x2Gy	Ctl+ FS -FDG 2	69103	81316	139	130215	165128	177	45.3
290715 7x2Gy	Ctl+ FS -FDG 3	68557	81351	146	128634	162860	179	49.3
290715 7x2Gy	Ombre 1	59327	60598	1318	123493	174874	4707	17.8
290715 7x2Gy	Ombre 2	59786	59916	1358	125910	170646	4624	18.7
290715 7x2Gy	Ombre 3	56824	60603	1305	117156	171419	4747	17.1
290715 7x2Gy	Penombre 1	56535	66335	1643	125016	191446	5820	18
290715 7x2Gy	Penombre 2	54037	65976	1383	125654	194752	5156	22.3
290715 7x2Gy	Penombre 3	56673	66207	1593	129779	192984	5685	10.2
290715 7x2Gy	Plein Champ 1 Poubelle	39730	71918	1582	191111	239198	4583	24
290715 7x2Gy	Plein Champ 2	48167	71347	2042	118929	183895	4882	26.3
290715 7x2Gy	Plein Champ 3	54119	76652	2519	137202	208238	6192	38.9
7x2Gy										ET
	P1 FSC-A Mean	P1 SSC-A Mean	P4 FITC-A Mean	P2 FSC-A Mean	P2 SSC-A Mean	P3 FITC-A Mean	%P2			P1 FSC-A Mean	P1 SSC-A Mean	P4 FITC-A Mean	P2 FSC-A Mean	P2 SSC-A Mean	P3 FITC-A Mean	%P2
Ctl NI +FDG 1	55419.3	48284.7	650.667	135422	165209	3470	9.93333			1420.56	1888.19	13.2035	1281.3	2627.84	155.116	0.251661
Ctl+ FS +FDG 1	69851.7	79012.7	1828.67	126112	160379	3559	44.5667			1654.41	1184.49	137.613	2048.4	2688.89	239.33	1.44684
Ombre 1	58645.7	60372.3	1327	122186	172313	4692.67	17.8667			1594.22	395.204	27.6225	4520.91	2251.32	62.7402	0.802081
Penombre 1	55748.3	66172.7	1539.67	126816	193061	5553.67	16.8333			1483.66	181.946	137.961	2585.5	1654.33	350.942	6.13379
Plein champ	47338.7	73305.7	2047.67	149081	210444	5219	29.7333			4208.7	3751.2	337.29	12921	17213.1	926.31	8.90955
ET
	P1 FSC-A Mean	P1 SSC-A Mean	P4 FITC-A Mean	P2 FSC-A Mean	P2 SSC-A Mean	P3 FITC-A Mean
Ctl NI +FDG 1	1420.56	1888.19	13.2035	1281.3	2627.84	155.116	0.251661
Ctl+ FS +FDG 1	1654.41	1184.49	137.613	2048.4	2688.89	239.33	1.44684
Ombre 1	1594.22	395.204	27.6225	4520.91	2251.32	62.7402	0.802081
Penombre 1	1483.66	181.946	137.961	2585.5	1654.33	350.942	6.13379
Plein Champ 2	4208.7	3751.2	337.29	12921	17213.1	926.31	8.90955
	P1 FSC-A Mean	P1 SSC-A Mean	P4 FITC-A Mean	P2 FSC-A Mean	P2 SSC-A Mean	P3 FITC-A Mean	% P2
Probabilité
Ctl NI +FDG 1 vs Ctl FS+FDG	0.00033049	1.8244e-05	0.000122673	0.00261922	0.0900847	0.61754	2.14667e-06
Ctl NI + FDG vs Ombre	0.0589824	0.000409046	2.78663e-06	0.00816833	0.0236737	0.000224413	8.19891e-05
Ctl NI + FDG vs Penombre	0.795205	8.22424e-05	0.000373381	0.00667261	0.000100223	0.000712034	0.123413
Ctl NI + FDG vs Plein Champ	0.180271	0.00179589	0.00275576	0.363139	0.0448944	0.0259177	0.0169835
Probabilité t test
Ctl NI +FDG 1 vs Ctl FS+FDG	***	***	***	**			***
Ctl NI + FDG vs Ombre		***	***	**		***	***
Ctl NI + FDG vs Penombre		***	***	**	***	***
Ctl NI + FDG vs Plein Champ		**	**		*	*	*

## Sheet: 30-07-2015 9x2 Gy
Specimen Name	Tube Name	P1 FSC-A Mean	P1 SSC-A Mean	P4 FITC-A Mean	P2 FSC-A Mean	P2 SSC-A Mean	P3 FITC-A Mean	%P2
310715 9x2Gy	Ctl NI +FDG 1	54419	54264	880	129282	174030	4463	9.7
310715 9x2Gy	Ctl NI +FDG 2	54482	53997	838	128444	173445	4332	10.2
310715 9x2Gy	Ctl NI +FDG 3	53622	55204	858	129984	177676	4331	9.9
310715 9x2Gy	Ctl NI -FDG 1	52649	55524		116296	172723	133	7.1
310715 9x2Gy	Ctl NI -FDG 2	53670	56640	97	121888	173105	117	7.7
310715 9x2Gy	Ctl NI -FDG 3	53808	56421	136	123218	176437	144	8.6
310715 9x2Gy	Ctl+ FS +FDG 1	65892	89425	2020	120531	175961	3715	45.5
310715 9x2Gy	Ctl+ FS +FDG 2	66945	90973	1828	118969	173209	3326	42.9
310715 9x2Gy	Ctl+ FS +FDG 3	67045	91155	1945	118515	176765	3752	45.3
310715 9x2Gy	Ctl+ FS -FDG 1	67287	90632	271	125708	177453	137	51.3
310715 9x2Gy	Ctl+ FS -FDG 2	68468	89488	330	123495	171104	144	45.3
310715 9x2Gy	Ctl+ FS -FDG 3	65850	89063	204	125625	177707	141	49.3
310715 9x2Gy	Ombre 1	57808	63142	1002	125794	182719	4136	17.8
310715 9x2Gy	Ombre 2	57083	62653	1012	127221	181852	4222	18.7
310715 9x2Gy	Ombre 3	57036	64144	1057	124512	180844	4096	17.1
310715 9x2Gy	Penombre 1	52784	62368	1205	124870	190861	5210	18
310715 9x2Gy	Penombre 2	52570	65050	1269	127172	194469	5349	22.3
310715 9x2Gy	Penombre 3	44707	60737	1052	110907	196263	4759	10.2
310715 9x2Gy	Plein Champ 1 Poubelle	40457	60614	1501	131982	212619	6066	24
310715 9x2Gy	Plein Champ 2	41781	62593	1680	131517	210765	5995	26.3
310715 9x2Gy	Plein Champ 3	45473	62651	1865	141525	212348	6347	38.9
9x2Gy
	P1 FSC-A Mean	P1 SSC-A Mean	P4 FITC-A Mean	P2 FSC-A Mean	P2 SSC-A Mean	P3 FITC-A Mean	%P2
Ctl NI +FDG 1	54174.3	54488.3	858.667	129237	175050	4375.33	9.93333
Ctl+ FS +FDG 1	66627.3	90517.7	1931	119338	175312	3597.67	44.5667
Ombre 1	57309	63313	1023.67	125842	181805	4151.33	17.8667
Penombre 1	52677	63709	1237	126021	192665	5279.5	20.15
Penombre 3	42570.3	61952.7	1682	135008	211911	6136	29.7333
ET
	P1 FSC-A Mean	P1 SSC-A Mean	P4 FITC-A Mean	P2 FSC-A Mean	P2 SSC-A Mean	P3 FITC-A Mean
Ctl NI +FDG 1	479.371	634	21.0079	771	2292.63	75.9232	0.251661
Ctl+ FS +FDG 1	638.777	950.643	96.7626	1057.53	1864.81	235.996	1.44684
Ombre 1	432.785	760.066	29.2973	1355.15	938.383	64.3843	0.802081
Penombre 1	151.321	1896.46	45.2548	1627.76	2551.24	98.2878	3.04056
Plein Champ 2	2610.64	41.0122	130.815	7076.72	1119.35	248.902	7.52485
Probabilité
Ctl NI +FDG 1 vs Ctl FS+FDG	1.11755e-05	6.72954e-07	4.756e-05	0.000196062	0.885685	0.00556774	2.14667e-06
Ctl NI + FDG vs Ombre	0.00109579	0.000102617	0.00137061	0.0195907	0.00915284	0.0175795	8.19891e-05
Ctl NI + FDG vs Penombre	0.0264194	0.00361365	0.000926876	0.05271	0.00393143	0.0013131	0.00796405
Ctl NI + FDG vs Plein Champ	0.00160541	0.00061203	0.00146935	0.154401	1.40036e-05	0.000110107	0.0129165
	P1 FSC-A Mean	P1 SSC-A Mean	P4 FITC-A Mean	P2 FSC-A Mean	P2 SSC-A Mean	P3 FITC-A Mean	% P2
Probabilité t test
Ctl NI +FDG 1 vs Ctl FS+FDG	***	***	***	***			***
Ctl NI + FDG vs Ombre	**	***	**	*	**	*	***
Ctl NI + FDG vs Penombre	*	**	***		**	**	**
Ctl NI + FDG vs Plein Champ	**	***	**		***	***	*
								%P2
								%P2
								%P2
								%P2
								%P2
								%P2
								%P2
								%P2
								%P2
								%P2
								%P2
								%P2
								%P2
								%P2
								%P2
								%P2
								%P2
								%P2
								%P2
								%P2
								%P2
								%P2
								%P2
								%P2
								%P2
								%P2
								%P2
								%P2
								%P2
								%P2
								%P2
								%P2
								%P2
								%P2
								%P2
								%P2
								%P2
								%P2
								%P2
								%P2
								%P2
								%P2
								%P2
								%P2
								%P2
								%P2
								%P2
								%P2
								%P2
								%P2
								%P2
								%P2
								%P2
								%P2
								%P2
								%P2
								%P2
								%P2
								%P2
								%P2
								%P2
								%P2
								%P2
								%P2
								%P2
								%P2
								%P2
								%P2
								%P2
								%P2
								%P2
								%P2
								%P2
								%P2
								%P2
								%P2
								%P2
								%P2
								%P2
								%P2
								%P2
								%P2
								%P2
								%P2
								%P2
								%P2
								%P2
								%P2
								%P2
								%P2
								%P2
								%P2
								%P2
								%P2
								%P2
								%P2
								%P2
								%P2
								%P2
								%P2
								%P2
								%P2
								%P2
								%P2
								%P2
								%P2
								%P2
								%P2
								%P2
								%P2
								%P2
								%P2
								%P2
								%P2
								%P2
								%P2
								%P2
								%P2
								%P2
								%P2
								%P2
								%P2
								%P2
								%P2
								%P2
								%P2
								%P2
								%P2
								%P2
								%P2
								%P2
								%P2
								%P2
								%P2
								%P2
								%P2
								%P2
								%P2
								%P2
								%P2
								%P2
								%P2
								%P2
								%P2
								%P2
								%P2
								%P2
								%P2
								%P2
								%P2
								%P2
								%P2
								%P2
								%P2
								%P2
								%P2
								%P2
								%P2
								%P2
								%P2
								%P2
								%P2
								%P2
								%P2
								%P2
								%P2
								%P2
								%P2
								%P2
								%P2
								%P2
								%P2
								%P2
								%P2
								%P2
								%P2
								%P2
								%P2
								%P2
								%P2
								%P2
								%P2
								%P2
								%P2
								%P2
								%P2
								%P2
								%P2
								%P2
								%P2
								%P2
								%P2
								%P2
								%P2
								%P2
								%P2
								%P2
								%P2
								%P2
								%P2
								%P2
								%P2
								%P2
								%P2
								%P2
								%P2
								%P2
								%P2
								%P2
								%P2
								%P2
								%P2
								%P2
								%P2
								%P2
								%P2
								%P2
								%P2
								%P2
								%P2
								%P2
								%P2
								%P2
								%P2
								%P2
								%P2
								%P2
								%P2
								%P2
								%P2
								%P2
								%P2
								%P2
								%P2
								%P2
								%P2
								%P2
								%P2
								%P2
								%P2
								%P2
								%P2
								%P2
								%P2
								%P2
								%P2
								%P2
								%P2
								%P2
								%P2
								%P2
								%P2
								%P2
								%P2
								%P2
								%P2
								%P2
								%P2
								%P2
								%P2
								%P2
								%P2
								%P2
								%P2
								%P2
								%P2
								%P2
								%P2
								%P2
								%P2
								%P2
								%P2
								%P2
								%P2
								%P2
								%P2
								%P2
								%P2
								%P2
								%P2
								%P2
								%P2
								%P2
								%P2
								%P2
								%P2
								%P2
								%P2
								%P2
								%P2
								%P2
								%P2
								%P2
								%P2
								%P2
								%P2
								%P2
								%P2
								%P2
								%P2
								%P2
								%P2
								%P2
								%P2
								%P2
								%P2
								%P2
								%P2
								%P2
								%P2
								%P2
								%P2
								%P2
								%P2
								%P2
								%P2
								%P2
								%P2
								%P2
								%P2
								%P2
								%P2
								%P2
								%P2
								%P2
								%P2
								%P2
								%P2
								%P2
								%P2
								%P2
								%P2
								%P2
								%P2
								%P2
								%P2
								%P2
								%P2
								%P2
								%P2
								%P2
								%P2
								%P2
								%P2
								%P2
								%P2
								%P2
								%P2
								%P2
								%P2
								%P2
								%P2
								%P2
								%P2
								%P2
								%P2
								%P2
								%P2
								%P2
								%P2
								%P2
								%P2
								%P2
								%P2
								%P2
								%P2
								%P2
								%P2
								%P2
								%P2
								%P2
								%P2
								%P2
								%P2
								%P2
								%P2
								%P2
								%P2
								%P2
								%P2
								%P2
								%P2
								%P2
								%P2
								%P2
								%P2
								%P2
								%P2
								%P2
								%P2
								%P2
								%P2
								%P2
								%P2
								%P2
								%P2
								%P2
								%P2
								%P2
								%P2
								%P2
								%P2
								%P2
								%P2
								%P2
								%P2
								%P2
								%P2
								%P2
								%P2
								%P2
								%P2
								%P2
								%P2
								%P2
								%P2
								%P2
								%P2
								%P2
								%P2
								%P2
								%P2
								%P2
								%P2
								%P2
								%P2
								%P2
								%P2
								%P2
								%P2
								%P2
								%P2
								%P2
								%P2
								%P2
								%P2
								%P2
								%P2
								%P2
								%P2
								%P2
								%P2
								%P2
								%P2
								%P2
								%P2
								%P2
								%P2
								%P2
								%P2
								%P2
								%P2
								%P2
								%P2
								%P2
								%P2
								%P2
								%P2
								%P2
								%P2
								%P2
								%P2
								%P2
								%P2
								%P2
								%P2
								%P2
								%P2
								%P2
								%P2
								%P2
								%P2
								%P2
								%P2
								%P2
								%P2
								%P2
								%P2
								%P2
								%P2
								%P2
								%P2
								%P2
								%P2
								%P2
								%P2
								%P2
								%P2
								%P2
								%P2
								%P2
								%P2
								%P2
								%P2
								%P2
								%P2
								%P2
								%P2
								%P2
								%P2
								%P2
								%P2
								%P2
								%P2
								%P2
								%P2
								%P2
								%P2
								%P2
								%P2
								%P2
								%P2
								%P2
								%P2
								%P2
								%P2
								%P2
								%P2
								%P2
								%P2
								%P2
								%P2
								%P2
								%P2
								%P2
								%P2
								%P2
								%P2
								%P2
								%P2
								%P2
								%P2
								%P2
								%P2
								%P2
								%P2
								%P2
								%P2
								%P2
								%P2
								%P2
								%P2
								%P2
								%P2
								%P2
								%P2
								%P2
								%P2
								%P2
								%P2
								%P2
								%P2
								%P2
								%P2
								%P2
								%P2
								%P2
								%P2
								%P2
								%P2
								%P2
								%P2
								%P2
								%P2
								%P2
								%P2
								%P2
								%P2
								%P2
								%P2
								%P2
								%P2
								%P2
								%P2
								%P2
								%P2
								%P2
								%P2
								%P2
								%P2
								%P2
								%P2
								%P2
								%P2
								%P2
								%P2
								%P2
								%P2
								%P2
								%P2
								%P2
								%P2
								%P2
								%P2
								%P2
								%P2
								%P2
								%P2
								%P2
								%P2
								%P2
								%P2
								%P2
								%P2
								%P2
								%P2
								%P2
								%P2
								%P2
								%P2
								%P2
								%P2
								%P2
								%P2
								%P2
								%P2
								%P2
								%P2
								%P2
								%P2
								%P2
								%P2
								%P2
								%P2
								%P2
								%P2
								%P2
								%P2
								%P2
								%P2
								%P2
								%P2
								%P2
								%P2
								%P2
								%P2
								%P2
								%P2
								%P2
								%P2
								%P2
								%P2
								%P2
								%P2
								%P2
								%P2
								%P2
								%P2
								%P2
								%P2
								%P2
								%P2
								%P2
								%P2
								%P2
								%P2
								%P2
								%P2
								%P2
								%P2
								%P2
								%P2
								%P2
								%P2
								%P2
								%P2
								%P2
								%P2
								%P2
								%P2
								%P2
								%P2
								%P2
								%P2
								%P2
								%P2
								%P2
								%P2
								%P2
								%P2
								%P2
								%P2
								%P2
								%P2
								%P2
								%P2
								%P2
								%P2
								%P2
								%P2
								%P2
								%P2
								%P2
								%P2
								%P2
								%P2
								%P2
								%P2
								%P2
								%P2
								%P2
								%P2
								%P2
								%P2
								%P2
								%P2
								%P2
								%P2
								%P2
								%P2
								%P2
								%P2
								%P2
								%P2
								%P2
								%P2
								%P2
								%P2
								%P2
								%P2
								%P2
								%P2
								%P2
								%P2
								%P2
								%P2
								%P2
								%P2
								%P2
								%P2
								%P2
								%P2
								%P2
								%P2
								%P2
								%P2
								%P2
								%P2
								%P2
								%P2
								%P2
								%P2
								%P2
								%P2
								%P2
								%P2
								%P2
								%P2
								%P2
								%P2
								%P2
								%P2
								%P2
								%P2
								%P2
								%P2
								%P2
								%P2
								%P2
								%P2
								%P2
								%P2
								%P2
								%P2
								%P2
								%P2
								%P2
								%P2
								%P2
								%P2
								%P2
								%P2
								%P2
								%P2
								%P2
								%P2
								%P2
								%P2
								%P2
								%P2
								%P2
								%P2
								%P2
								%P2
								%P2
								%P2
								%P2
								%P2
								%P2
								%P2
								%P2
								%P2
								%P2
								%P2
								%P2
								%P2
								%P2
								%P2
								%P2
								%P2
								%P2
								%P2
								%P2
								%P2
								%P2
								%P2
								%P2
								%P2
								%P2
								%P2
								%P2
								%P2
								%P2
								%P2
								%P2
								%P2
								%P2
								%P2
								%P2
								%P2
								%P2
								%P2
								%P2
								%P2
								%P2
								%P2
								%P2
								%P2
								%P2
								%P2
								%P2
								%P2
								%P2
								%P2
								%P2
								%P2
								%P2
								%P2
								%P2
								%P2
								%P2
								%P2
								%P2
								%P2
								%P2
								%P2
								%P2
								%P2
								%P2
								%P2
								%P2
								%P2
								%P2
								%P2
								%P2
								%P2
								%P2
								%P2
								%P2
								%P2
								%P2
								%P2
								%P2
								%P2
								%P2
								%P2
								%P2
								%P2
								%P2
								%P2
								%P2
								%P2
								%P2
								%P2
								%P2
								%P2
								%P2
								%P2
								%P2
								%P2
								%P2
								%P2
								%P2
								%P2
								%P2
								%P2
								%P2
								%P2
								%P2
								%P2
								%P2
								%P2
								%P2
								%P2
								%P2
								%P2
								%P2
								%P2
								%P2
								%P2
								%P2
								%P2
								%P2
								%P2
								%P2
								%P2
								%P2
								%P2
								%P2
								%P2
								%P2
								%P2
								%P2
								%P2
								%P2
								%P2
								%P2
								%P2
								%P2
								%P2
								%P2
								%P2
								%P2
								%P2
								%P2
								%P2
								%P2
								%P2
								%P2
								%P2
								%P2
								%P2
								%P2
								%P2
								%P2
								%P2
								%P2
								%P2
								%P2
								%P2
								%P2
								%P2
								%P2
								%P2
								%P2
								%P2
								%P2
								%P2
								%P2
								%P2
								%P2
								%P2
								%P2
								%P2
								%P2
								%P2
								%P2
								%P2
								%P2
								%P2
								%P2
								%P2
								%P2
								%P2
								%P2
								%P2
								%P2
								%P2
								%P2
								%P2
								%P2
								%P2
								%P2
								%P2
								%P2
								%P2
								%P2
								%P2
								%P2
								%P2
								%P2
								%P2
								%P2
								%P2
								%P2
								%P2
								%P2
								%P2
								%P2
								%P2
								%P2
								%P2
								%P2
								%P2
								%P2
								%P2
								%P2
								%P2
								%P2
								%P2
								%P2
								%P2
								%P2
								%P2
								%P2
								%P2
								%P2
								%P2
								%P2
								%P2
								%P2
								%P2
								%P2
								%P2
								%P2
								%P2
								%P2
								%P2
								%P2
								%P2
								%P2
								%P2
								%P2
								%P2
								%P2
								%P2
								%P2
								%P2
								%P2
								%P2
								%P2
								%P2
								%P2
								%P2
								%P2
								%P2
								%P2
								%P2
								%P2
								%P2
								%P2
								%P2
								%P2
								%P2
								%P2
								%P2
								%P2
								%P2
								%P2
								%P2
								%P2
								%P2
								%P2
								%P2
								%P2
								%P2
								%P2
								%P2
								%P2
								%P2
								%P2
								%P2
								%P2
								%P2
								%P2
								%P2
								%P2
								%P2
								%P2
								%P2
								%P2
								%P2
								%P2
								%P2
								%P2
								%P2
								%P2
								%P2
								%P2
								%P2
								%P2
								%P2
								%P2
								%P2
								%P2
								%P2
								%P2
								%P2
								%P2
								%P2
								%P2
								%P2
								%P2
								%P2
								%P2
								%P2
								%P2
								%P2
								%P2
								%P2
								%P2
								%P2
								%P2
								%P2
								%P2
								%P2
								%P2
								%P2
								%P2
								%P2
								%P2
								%P2
								%P2
								%P2
								%P2
								%P2
								%P2
								%P2
								%P2
								%P2
								%P2
								%P2
								%P2
								%P2
								%P2
								%P2
								%P2
								%P2
								%P2
								%P2
								%P2
								%P2
								%P2
								%P2
								%P2
								%P2
								%P2
								%P2
								%P2
								%P2
								%P2
								%P2
								%P2
								%P2
								%P2
								%P2
								%P2
								%P2
								%P2
								%P2
								%P2
								%P2
								%P2
								%P2
								%P2
								%P2
								%P2
								%P2
								%P2
								%P2
								%P2
								%P2
								%P2
								%P2
								%P2
								%P2
								%P2
								%P2
								%P2
								%P2
								%P2
								%P2
								%P2
								%P2
								%P2
								%P2
								%P2
								%P2
								%P2
								%P2
								%P2
								%P2
								%P2
								%P2
								%P2
								%P2
								%P2
								%P2
								%P2
								%P2
								%P2
								%P2
								%P2
								%P2
								%P2
								%P2
								%P2
								%P2
								%P2
								%P2
								%P2
								%P2
								%P2
								%P2
								%P2
								%P2
								%P2
								%P2
								%P2
								%P2
								%P2
								%P2
								%P2
								%P2
								%P2
								%P2
								%P2
								%P2
								%P2
								%P2
								%P2
								%P2
								%P2
								%P2
								%P2
								%P2
								%P2
								%P2
								%P2
								%P2
								%P2
								%P2
								%P2
								%P2
								%P2
								%P2
								%P2
								%P2
								%P2
								%P2
								%P2
								%P2
								%P2
								%P2
								%P2
								%P2
								%P2
								%P2
								%P2
								%P2
								%P2
								%P2
								%P2
								%P2
								%P2
								%P2
								%P2
								%P2
								%P2
								%P2
								%P2
								%P2
								%P2
								%P2
								%P2
								%P2
								%P2
								%P2
								%P2
								%P2
								%P2
								%P2
								%P2
								%P2
								%P2
								%P2
								%P2
								%P2
								%P2
								%P2
								%P2
								%P2
								%P2
								%P2
								%P2
								%P2
								%P2
								%P2
								%P2
								%P2
								%P2
								%P2
								%P2
								%P2
								%P2
								%P2
								%P2
								%P2
								%P2
								%P2
								%P2
								%P2
								%P2
								%P2
								%P2
								%P2
								%P2
								%P2
								%P2
								%P2
								%P2
								%P2
								%P2
								%P2
								%P2
								%P2
								%P2
								%P2
								%P2
								%P2
								%P2
								%P2
								%P2
								%P2
								%P2
								%P2
								%P2
								%P2
								%P2
								%P2
								%P2
								%P2
								%P2
								%P2
								%P2
								%P2
								%P2
								%P2
								%P2
								%P2
								%P2
								%P2
								%P2
								%P2
								%P2
								%P2
								%P2
								%P2
								%P2
								%P2
								%P2
								%P2
								%P2
								%P2
								%P2
								%P2
								%P2
								%P2
								%P2
								%P2
								%P2
								%P2
								%P2
								%P2
								%P2
								%P2
								%P2
								%P2
								%P2
								%P2
								%P2
								%P2
								%P2
								%P2
								%P2
								%P2
								%P2
								%P2
								%P2
								%P2
								%P2
								%P2
								%P2
								%P2
								%P2
								%P2
								%P2
								%P2
								%P2
								%P2
								%P2
								%P2
								%P2
								%P2
								%P2
								%P2
								%P2
								%P2
								%P2
								%P2
								%P2
								%P2
								%P2
								%P2
								%P2
								%P2
								%P2
								%P2
								%P2
								%P2
								%P2
								%P2
								%P2
								%P2
								%P2
								%P2
								%P2
								%P2
								%P2
								%P2
								%P2
								%P2
								%P2
								%P2
								%P2
								%P2
								%P2
								%P2
								%P2
								%P2
								%P2
								%P2
								%P2
								%P2
								%P2
								%P2
								%P2
								%P2
								%P2
								%P2
								%P2
								%P2
								%P2
								%P2
								%P2
								%P2
								%P2
								%P2
								%P2
								%P2
								%P2
								%P2
								%P2
								%P2
								%P2
								%P2
								%P2
								%P2
								%P2
								%P2
								%P2
								%P2
								%P2
								%P2
								%P2
								%P2
								%P2
								%P2
								%P2
								%P2
								%P2
								%P2
								%P2
								%P2
								%P2
								%P2
								%P2
								%P2
								%P2
								%P2
								%P2
								%P2
								%P2
								%P2
								%P2
								%P2
								%P2
								%P2
								%P2
								%P2
								%P2
								%P2
								%P2
								%P2
								%P2
								%P2
								%P2
								%P2
								%P2
								%P2
								%P2
								%P2
								%P2
								%P2
								%P2
								%P2
								%P2
								%P2
								%P2
								%P2
								%P2
								%P2
								%P2
								%P2
								%P2
								%P2
								%P2
								%P2
								%P2
								%P2
								%P2
								%P2
								%P2
								%P2
								%P2
								%P2
								%P2
								%P2
								%P2
								%P2
								%P2
								%P2
								%P2
								%P2
								%P2
								%P2
								%P2
								%P2
								%P2
								%P2
								%P2
								%P2
								%P2
								%P2
								%P2
								%P2
								%P2
								%P2
								%P2
								%P2
								%P2
								%P2
								%P2
								%P2
								%P2
								%P2
								%P2
								%P2
								%P2
								%P2
								%P2
								%P2
								%P2
								%P2
								%P2
								%P2
								%P2
								%P2
								%P2
								%P2
								%P2
								%P2
								%P2
								%P2
								%P2
								%P2
								%P2
								%P2
								%P2
								%P2
								%P2
								%P2
								%P2
								%P2
								%P2
								%P2
								%P2
								%P2
								%P2
								%P2
								%P2
								%P2
								%P2
								%P2
								%P2
								%P2
								%P2
								%P2
								%P2
								%P2
								%P2
								%P2
								%P2
								%P2
								%P2
								%P2
								%P2
								%P2
								%P2
								%P2
								%P2
								%P2
								%P2
								%P2
								%P2
								%P2
								%P2
								%P2
								%P2
								%P2
								%P2
								%P2
								%P2
								%P2
								%P2
								%P2
								%P2
								%P2
								%P2
								%P2
								%P2
								%P2
								%P2
								%P2
								%P2
								%P2
								%P2
								%P2
								%P2
								%P2
								%P2
								%P2
								%P2
								%P2
								%P2
								%P2
								%P2
								%P2
								%P2
								%P2
								%P2
								%P2
								%P2
								%P2
								%P2
								%P2
								%P2
								%P2
								%P2
								%P2
								%P2
								%P2
								%P2
								%P2
								%P2
								%P2
								%P2
								%P2
								%P2
								%P2
								%P2
								%P2
								%P2
								%P2
								%P2
								%P2
								%P2
								%P2
								%P2
								%P2
								%P2
								%P2
								%P2
								%P2
								%P2
								%P2
								%P2
								%P2
								%P2
								%P2
								%P2
								%P2
								%P2
								%P2
								%P2
								%P2
								%P2
								%P2
								%P2
								%P2
								%P2
								%P2
								%P2
								%P2
								%P2
								%P2
								%P2
								%P2
								%P2
								%P2
								%P2
								%P2
								%P2
								%P2
								%P2
								%P2
								%P2
								%P2
								%P2
								%P2
								%P2
								%P2
								%P2
								%P2
								%P2
								%P2
								%P2
								%P2
								%P2
								%P2
								%P2
								%P2
								%P2
								%P2
								%P2
								%P2
								%P2
								%P2
								%P2
								%P2
								%P2
								%P2
								%P2
								%P2
								%P2
								%P2
								%P2
								%P2
								%P2
								%P2
								%P2
								%P2
								%P2
								%P2
								%P2
								%P2
								%P2
								%P2
								%P2
								%P2
								%P2
								%P2
								%P2
								%P2
								%P2
								%P2
								%P2
								%P2
								%P2
								%P2
								%P2
								%P2
								%P2
								%P2
								%P2
								%P2
								%P2
								%P2
								%P2
								%P2
								%P2
								%P2
								%P2
								%P2
								%P2
								%P2
								%P2
								%P2
								%P2
								%P2
								%P2
								%P2
								%P2
								%P2
								%P2
								%P2
								%P2
								%P2
								%P2
								%P2
								%P2
								%P2
								%P2
								%P2
								%P2
								%P2
								%P2
								%P2
								%P2
								%P2
								%P2
								%P2
								%P2
								%P2
								%P2
								%P2
								%P2
								%P2
								%P2
								%P2
								%P2
								%P2
								%P2
								%P2
								%P2
								%P2
								%P2
								%P2
								%P2
								%P2
								%P2
								%P2
								%P2
								%P2
								%P2
								%P2
								%P2
								%P2
								%P2
								%P2
								%P2
								%P2
								%P2
								%P2
								%P2
								%P2
								%P2
								%P2
								%P2
								%P2
								%P2
								%P2
								%P2
								%P2
								%P2
								%P2
								%P2
								%P2
								%P2
								%P2
								%P2
								%P2
								%P2
								%P2
								%P2
								%P2
								%P2
								%P2
								%P2
								%P2
								%P2
								%P2
								%P2
								%P2
								%P2
								%P2
								%P2
								%P2
								%P2
								%P2
								%P2
								%P2
								%P2
								%P2
								%P2
								%P2
								%P2
								%P2
								%P2
								%P2
								%P2
								%P2
								%P2
								%P2
								%P2
								%P2
								%P2
								%P2
								%P2
								%P2
								%P2
								%P2
								%P2
								%P2
								%P2
								%P2
								%P2
								%P2
								%P2
								%P2
								%P2
								%P2
								%P2
								%P2
								%P2
								%P2
								%P2
								%P2
								%P2
								%P2
								%P2
								%P2
								%P2
								%P2
								%P2
								%P2
								%P2
								%P2
								%P2
								%P2
								%P2
								%P2
								%P2
								%P2
								%P2
								%P2
								%P2
								%P2
								%P2
								%P2
								%P2
								%P2
								%P2
								%P2
								%P2
								%P2
								%P2
								%P2
								%P2
								%P2
								%P2
								%P2
								%P2
[truncated: 1,046,576+ more rows]

## Sheet: 27-07-2015 5x2 Gy
Specimen Name	Tube Name	P1 FSC-A Mean	P1 SSC-A Mean	P4 FITC-A Mean	P2 FSC-A Mean	P2 SSC-A Mean	P3 FITC-A Mean	%P2
270715 5x2Gy	Ctl NI +FDG 1	57940	51113	1066	132071	169418	5262	7.3
270715 5x2Gy	Ctl NI +FDG 2	56932	50512	1014	130737	164929	4778	7.3
270715 5x2Gy	Ctl NI +FDG 3	55889	49327	1013	133928	163980	4911	5.6
270715 5x2Gy	Ctl NI -FDG 1	58086	54408		128484	167448	148	7.5
270715 5x2Gy	Ctl NI -FDG 2	59289	56165		128337	165889	134	8.3
270715 5x2Gy	Ctl NI -FDG 3	58664	55762		126679	165196	145	8.2
270715 5x2Gy	Ctl+ FS +FDG 1	66298	77571	1985	119543	167153	4827	23.8
270715 5x2Gy	Ctl+ FS +FDG 2	66242	77765	1981	120510	167394	4659	25.1
270715 5x2Gy	Ctl+ FS +FDG 3	63929	77905	2198	116002	168076	5558	23.3
270715 5x2Gy	Ctl+ FS -FDG 1	70789	80128		131079	166200	593	29.5
270715 5x2Gy	Ctl+ FS -FDG 2	68867	79268	133	126443	160583	200	26.9
270715 5x2Gy	Ctl+ FS -FDG 3	68368	80058		126727	163438	165	25.5
270715 5x2Gy	Ombre 1	64387	68497	1039	135361	170424	3257	19.6
270715 5x2Gy	Ombre 2	64533	68458	1031	137497	171815	3367	20
270715 5x2Gy	Ombre 3	64011	68843	1135	132820	169701	3684	18.8
270715 5x2Gy	Penombre 1	64649	69596	1386	137736	178763	4662	30.4
270715 5x2Gy	Penombre 2	61909	68401	1404	130662	174924	4402	22.8
270715 5x2Gy	Penombre 3	62987	69622	1462	133664	178371	4727	29.6
270715 5x2Gy	Plein Champ 1 Poubelle	58603	70836	1759	144985	183068	4031	43.2
270715 5x2Gy	Plein Champ 2	55698	69467	1752	140653	183691	3929	37.7
270715 5x2Gy	Plein Champ 3	57396	73580	1710	145866	191210	4172	48.4
5x2Gy
	P1 FSC-A Mean	P1 SSC-A Mean	P4 FITC-A Mean	P2 FSC-A Mean	P2 SSC-A Mean	P3 FITC-A Mean	%P2
Ctl NI +FDG 1	56920.3	50317.3	1031	132245	166109	4983.67	6.73333
Ctl+ FS +FDG 1	65489.7	77747	2054.67	118685	167541	5014.67	24.0667
Ombre 1	64310.3	68599.3	1068.33	135226	170647	3436	19.4667
Penombre 1	63181.7	69206.3	1417.33	134021	177353	4597	27.6
Plein Champ	57232.3	71294.3	1740.33	143835	185990	4044	43.1
ET
	P1 FSC-A Mean	P1 SSC-A Mean	P4 FITC-A Mean	P2 FSC-A Mean	P2 SSC-A Mean	P3 FITC-A Mean
Ctl NI +FDG 1	1025.55	908.774	30.315	1602.63	2904.7	250.049	0.981495
Ctl+ FS +FDG 1	1351.87	167.726	124.146	2373.32	478.737	477.979	0.929157
Ombre 1	269.313	211.921	57.8734	2341.42	1074.45	221.705	0.61101
Penombre 1	1380.33	697.56	39.7157	3550.46	2112.4	171.974	4.17612
Plein Champ 2	1200.67	2908.33	29.6985	3686.15	5316.74	171.827	7.56604
Probabilité
Ctl NI +FDG 1 vs Ctl FS+FDG	0.000941389	8.56742e-07	0.000156468	0.00120422	0.446923	0.925501	2.43139e-05
Ctl NI + FDG vs Ombre	0.000270066	4.49905e-06	0.378321	0.142956	0.0641353	0.00131045	4.4491e-05
Ctl NI + FDG vs Penombre	0.0155194	0.000178988	0.000589849	0.548042	0.0256439	0.120686	0.00652692
Ctl NI + FDG vs Plein Champ	0.777019	9.1138e-05	6.87303e-06	0.00336498	0.00306582	0.00426027	0.000317826
	P1 FSC-A Mean	P1 SSC-A Mean	P4 FITC-A Mean	P2 FSC-A Mean	P2 SSC-A Mean	P3 FITC-A Mean	% P2
Probabilité t test
Ctl NI +FDG 1 vs Ctl FS+FDG	***	***	***	***			***
Ctl NI + FDG vs Ombre	**	***				**	***
Ctl NI + FDG vs Penombre	*	***	***		*		**
Ctl NI + FDG vs Plein Champ		***	***	**	**	**	***

## Sheet: 24-07-2015 4x2 Gy
Specimen Name	Tube Name	P1 FSC-A Mean	P1 SSC-A Mean	P4 FITC-A Mean	P2 FSC-A Mean	P2 SSC-A Mean	P3 FITC-A Mean	%P2
240715 4x2Gy	Ctl NI +FDG 1	62476	51663	957	137541	156953	3662	10.9
240715 4x2Gy	Ctl NI +FDG 2	61326	51342	971	135676	155513	3839	9.2
240715 4x2Gy	Ctl NI +FDG 3	60800	51642	1013	132594	157920	3960	9.2
240715 4x2Gy	Ctl NI -FDG 1	61178	54505		136730	163749	154	11.4
240715 4x2Gy	Ctl NI -FDG 2	62183	55090		139005	162504	152	11.8
240715 4x2Gy	Ctl NI -FDG 3	61714	54913		133849	160597	234	11.5
240715 4x2Gy	Ctl+ FS +FDG 1	68556	76490	2098	119400	159112	4704	19.5
240715 4x2Gy	Ctl+ FS +FDG 2	66870	75257	2041	115717	157056	4464	15.3
240715 4x2Gy	Ctl+ FS +FDG 3	67724	77994	2030	118193	165516	4381	21.7
240715 4x2Gy	Ctl+ FS -FDG 1	70710	79017		125915	157343	179	24.4
240715 4x2Gy	Ctl+ FS -FDG 2	68638	80017		123152	157880	201	25.2
240715 4x2Gy	Ctl+ FS -FDG 3	69822	80161		125787	156604	188	24.7
240715 4x2Gy	Ombre 1	53838	56991	1127	113463	175548	4587	10.1
240715 4x2Gy	Ombre 2	53958	57134	1120	112981	170410	4342	9.3
240715 4x2Gy	Ombre 3	54441	58229	1160	117626	174063	4497	11.5
240715 4x2Gy	Penombre 1	61113	67817	1701	114539	163567	4482	16.5
240715 4x2Gy	Penombre 2	58278	69132	1623	110579	163564	4308	16.7
240715 4x2Gy	Penombre 3	58299	70284	1638	110961	168986	4200	16.8
240715 4x2Gy	Plein Champ 1 Poubelle	68712	83908	1951	121417	167898	3978	38.8
240715 4x2Gy	Plein Champ 2	71250	84143	2011	121550	168774	4035	40.6
240715 4x2Gy	Plein Champ 3	70360	84217	1987	123611	170523	4039	42.3
4x2Gy
	P1 FSC-A Mean	P1 SSC-A Mean	P4 FITC-A Mean	P2 FSC-A Mean	P2 SSC-A Mean	P3 FITC-A Mean	%P2
Ctl NI +FDG 1	61534	51549	980.333	135270	156795	3820.33	9.76667
Ctl+ FS +FDG 1	67716.7	76580.3	2056.33	117770	160561	4516.33	18.8333
Ombre 1	54079	57451.3	1135.67	114690	173340	4475.33	10.3
Penombre 1	59230	69077.7	1654	112026	165372	4330	16.6667
Penombre 3	70107.3	84089.3	1983	122193	169065	4017.33	40.5667
ET
	P1 FSC-A Mean	P1 SSC-A Mean	P4 FITC-A Mean	P2 FSC-A Mean	P2 SSC-A Mean	P3 FITC-A Mean	%P2
Ctl NI +FDG 1	857.142	179.574	29.1433	2498.32	1211.22	149.874	0.981495
Ctl+ FS +FDG 1	843.024	1370.73	36.5011	1877.58	4412.29	167.739	3.25167
Ombre 1	319.191	677.264	21.362	2554.05	2644.13	123.929	1.11355
Penombre 1	1630.76	1234.4	41.3884	2184.4	3129.53	142.281	0.152753
Plein Champ 2	629.325	52.3259	16.9706	1457.35	1236.73	2.82843	1.20208
Probabilité
Ctl NI +FDG 1 vs Ctl FS+FDG	0.000878075	6.16068e-06	2.35733e-06	0.000632519	0.227119	0.00584944	0.00985538
Ctl NI + FDG vs Ombre	0.00014613	0.000128345	0.00173786	0.000567003	0.000595087	0.00430305	0.567445
Ctl NI + FDG vs Penombre	0.23323	5.94407e-05	0.000329342	0.00242913	0.00491258	0.0211268	0.0026378
Ctl NI + FDG vs Plein Champ	0.000658244	2.01914e-09	2.03834e-06	0.00124276	0.000296915	0.0906263	1.1899e-05
	P1 FSC-A Mean	P1 SSC-A Mean	P4 FITC-A Mean	P2 FSC-A Mean	P2 SSC-A Mean	P3 FITC-A Mean	% P2
Probabilité t test
Ctl NI +FDG 1 vs Ctl FS+FDG	***	***	***	***		**	**
Ctl NI + FDG vs Ombre	***	***	**	***	***	**
Ctl NI + FDG vs Penombre		***	***	**	**	*	**
Ctl NI + FDG vs Plein Champ	***	***	***	**	***		***

## Sheet: 22-07-2015 2x2 Gy
Specimen Name	Tube Name	P1 FSC-A Mean	P1 SSC-A Mean	P4 FITC-A Mean	P2 FSC-A Mean	P2 SSC-A Mean	P3 FITC-A Mean	%P2
220715 2x2Gy	Ctl NI +FDG 1	58919	70025	716	122615	189574	2582	7
220715 2x2Gy	Ctl NI +FDG 2	60394	70259	709	126163	191639	2582	7.4
220715 2x2Gy	Ctl NI +FDG 3	58917	69756	743	123795	192906	2848	7.8
220715 2x2Gy	Ctl NI -FDG 1	57256	71017	1159	118834	193265	165	7.9
220715 2x2Gy	Ctl NI -FDG 2	58837	71745		119749	191643	206	8
220715 2x2Gy	Ctl NI -FDG 3	59202	70508		119872	189244	136	7.3
220715 2x2Gy	Ctl+ FS +FDG 1	61866	66626	1295	126672	176938	3636	6.6
220715 2x2Gy	Ctl+ FS +FDG 2	62750	69728	1169	129114	182514	3417	9.3
220715 2x2Gy	Ctl+ FS +FDG 3	62440	67826	1127	130070	180368	3281	9.1
220715 2x2Gy	Ctl+ FS -FDG 1	62234	69575		130172	186006	181	10.4
220715 2x2Gy	Ctl+ FS -FDG 2	61154	69312		128880	183321	166	9.9
220715 2x2Gy	Ctl+ FS -FDG 3	62058	69821	134	128401	183336	233	9.9
220715 2x2Gy	Ombre 1	60538	73531	710	122726	190378	2297	8.6
220715 2x2Gy	Ombre 2	62394	77284	840	121510	191027	2575	9.2
220715 2x2Gy	Ombre 3	61641	75006	817	122830	190799	2660	9.1
220715 2x2Gy	Penombre 1	69730	85171	821	126742	186753	2156	13.6
220715 2x2Gy	Penombre 2	70235	85408	883	128683	188145	2358	12
220715 2x2Gy	Penombre 3	69400	85917	949	124677	186680	2480	11.1
220715 2x2Gy	Plein Champ 1 Poubelle	70742	90744	974	124857	187867	2290	14.9
220715 2x2Gy	Plein Champ 2	70178	90418	1076	118444	186271	2406	11.7
220715 2x2Gy	Plein Champ 3	70903	91162	1166	121693	188267	2671	14.1
2x2Gy
	P1 FSC-A Mean	P1 SSC-A Mean	P4 FITC-A Mean	P2 FSC-A Mean	P2 SSC-A Mean	P3 FITC-A Mean	%P2
Ctl NI +FDG 1	59410	70013.3	722.667	124191	191373	2670.67	7.4
Ctl+ FS +FDG 1	62352	68060	1197	128619	179940	3444.67	8.33333
Ombre 1	61524.3	75273.7	789	122355	190735	2510.67	8.96667
Penombre 1	69788.3	85498.7	884.333	126701	187193	2331.33	12.2333
Penombre 3	70607.7	90774.7	1072	121665	187468	2455.67	13.5667
ET
	P1 FSC-A Mean	P1 SSC-A Mean	P4 FITC-A Mean	P2 FSC-A Mean	P2 SSC-A Mean	P3 FITC-A Mean
Ctl NI +FDG 1	852.17	251.703	17.9536	1806.84	1681.85	153.575	0.4
Ctl+ FS +FDG 1	448.522	1564.18	87.43	1752.32	2812.53	179.11	1.50444
Ombre 1	933.484	1890.76	69.3758	733.925	329.248	189.859	0.321455
Penombre 1	420.545	381.175	64.0104	2003.32	825.552	163.638	1.26623
Plein Champ 2	512.652	526.087	63.6396	2297.39	1411.39	187.383	1.69706
Probabilité
Ctl NI +FDG 1 vs Ctl FS+FDG	0.00612231	0.0995909	0.000773873	0.0381454	0.00378259	0.00473557	0.357704
Ctl NI + FDG vs Ombre	0.044235	0.00879718	0.184137	0.178368	0.553976	0.319827	0.00613715
Ctl NI + FDG vs Penombre	0.000534962	5.51205e-06	0.0167885	0.104646	0.0628921	0.0567875	0.00393265
Ctl NI + FDG vs Plein Champ	3.16878e-05	1.46907e-07	0.00345935	0.300249	0.0271386	0.208276	0.00336841
	P1 FSC-A Mean	P1 SSC-A Mean	P4 FITC-A Mean	P2 FSC-A Mean	P2 SSC-A Mean	P3 FITC-A Mean	% P2
Probabilité t test
Ctl NI +FDG 1 vs Ctl FS+FDG	**		***	*	**	**
Ctl NI + FDG vs Ombre	*	**					**
Ctl NI + FDG vs Penombre	***	***	*				**
Ctl NI + FDG vs Plein Champ	***	***	**		*		**

## Sheet: 10-08-2015 15x2 Gy (2)
Specimen Name	Tube Name	P1 FSC-A Mean	P1 SSC-A Mean	P4 FITC-A Mean	P2 FSC-A Mean	P2 SSC-A Mean	P3 FITC-A Mean	%P2
100815 15x2Gy	Ctl NI +FDG 1	55166	54248	862	120068	163720	4173	8
100815 15x2Gy	Ctl NI +FDG 2	53927	53778	771	117225	167435	3979	6.6
100815 15x2Gy	Ctl NI +FDG 3	54381	54080	857	117514	166741	4514	7.4
100815 15x2Gy	Ctl NI -FDG 1	55689	56111		113312	165695		7.6
100815 15x2Gy	Ctl NI -FDG 2	56113	56246		117257	167689	141	8.1
100815 15x2Gy	Ctl NI -FDG 3	55149	56395		116576	167886	137	7.7
100815 15x2Gy	Ctl+ FS +FDG 1	57038	76016	2306	127201	180330	5390	48.1
100815 15x2Gy	Ctl+ FS +FDG 2	60686	78322	2269	128542	184049	4954	53.3
100815 15x2Gy	Ctl+ FS +FDG 3	57264	75488	2299	125156	180100	5078	44.6
100815 15x2Gy	Ctl+ FS -FDG 1	58599	76717	134	130061	185334	196	50.6
100815 15x2Gy	Ctl+ FS -FDG 2	56531	77107	140	127848	184055	170	51.9
100815 15x2Gy	Ctl+ FS -FDG 3	60486	78008	164	127822	183462	186	51.1
100815 15x2Gy	Ombre 1	59379	67824	1279	120035	166804	4067	14.8
100815 15x2Gy	Ombre 2	59606	68330	1293	118694	168233	4076	14.6
100815 15x2Gy	Ombre 3	57733	69052	1180	115488	170083	3875	15.7
100815 15x2Gy	Penombre 1	59112	73032	1755	131481	184468	4960	33.3
100815 15x2Gy	Penombre 2	59653	72013	1820	130990	180399	4960	31.8
100815 15x2Gy	Penombre 3	61052	73877	1608	133723	187101	4705	39
100815 15x2Gy	Plein Champ 1 Poubelle	37705	52231	1169	151789	215019	7323	17.6
100815 15x2Gy	Plein Champ 2	37932	52009	1245	149022	216288	7942	17.3
100815 15x2Gy	Plein Champ 3	37256	55363	1074	144005	216366	7685	19.5
15x2Gy
	P1 FSC-A Mean	P1 SSC-A Mean	P4 FITC-A Mean	P2 FSC-A Mean	P2 SSC-A Mean	P3 FITC-A Mean	%P2
Ctl NI +FDG 1	54491.3	54035.3	830	118269	165965	4222	7.33333
Ctl+ FS +FDG 1	58329.3	76608.7	2291.33	126966	181493	5140.67	48.6667
Ombre 1	58906	68402	1250.67	118072	168373	4006	15.0333
Penombre 1	59939	72974	1727.67	132065	183989	4875	34.7
Penombre 3	37631	53201	1162.67	148272	215891	7650	18.1333
ET
	P1 FSC-A Mean	P1 SSC-A Mean	P4 FITC-A Mean	P2 FSC-A Mean	P2 SSC-A Mean	P3 FITC-A Mean
Ctl NI +FDG 1	626.826	238.162	51.1566	1564.67	1975.23	270.845	0.702377
Ctl+ FS +FDG 1	2044.06	1507.09	19.6554	1705.15	2216.55	224.654	4.37759
Ombre 1	1022.17	617.158	61.5982	2336.38	1644	113.539	0.585947
Penombre 1	1001.12	933.353	108.611	1456.99	3376.54	147.224	3.79868
Plein Champ 2	478.004	2371.64	120.915	3547.55	55.1543	181.726	1.55563
Probabilité
Ctl NI +FDG 1 vs Ctl FS+FDG	0.0358979	1.37757e-05	1.31451e-06	0.00287464	0.000823015	0.0106436	8.60406e-05
Ctl NI + FDG vs Ombre	0.00310196	2.98268e-06	0.000808857	0.909421	0.179922	0.27168	0.000128692
Ctl NI + FDG vs Penombre	0.00238972	2.56638e-05	0.000229748	0.00161582	0.00439946	0.0353509	6.15817e-05
Ctl NI + FDG vs Plein Champ	2.14781e-06	0.487272	0.00446636	0.000255609	2.1387e-06	0.000135251	0.000173625
	P1 FSC-A Mean	P1 SSC-A Mean	P4 FITC-A Mean	P2 FSC-A Mean	P2 SSC-A Mean	P3 FITC-A Mean	% P2
Probabilité t test
Ctl NI +FDG 1 vs Ctl FS+FDG	*	***	***	**	***	*	***
Ctl NI + FDG vs Ombre	**	***	***				***
Ctl NI + FDG vs Penombre	**	***	***	**	**	*	***
Ctl NI + FDG vs Plein Champ	***		**	***	***	***	***

## Sheet: 05-08-2015 12x2 Gy
Specimen Name	Tube Name	P1 FSC-A Mean	P1 SSC-A Mean	P4 FITC-A Mean	P2 FSC-A Mean	P2 SSC-A Mean	P3 FITC-A Mean	%P2
050815 12x2Gy	Ctl NI +FDG 1	58954	57221	1112	130201	179206	4818	7.4
050815 12x2Gy	Ctl NI +FDG 2	57583	56283	1016	130016	180572	4503	7.6
050815 12x2Gy	Ctl NI +FDG 3	58439	56137	1045	128336	181562	4546	7
050815 12x2Gy	Ctl NI -FDG 1	57468	59292		127104	184337	144	7.3
050815 12x2Gy	Ctl NI -FDG 2	58408	60940	123	130871	184603	137	8.8
050815 12x2Gy	Ctl NI -FDG 3	57889	60898		128139	184442	235	8.2
050815 12x2Gy	Ctl+ FS +FDG 1	63080	87569	2196	131966	191532	4776	36.4
050815 12x2Gy	Ctl+ FS +FDG 2	69704	88758	2364	134575	191177	4609	39.5
050815 12x2Gy	Ctl+ FS +FDG 3	66837	86489	2195	131009	189927	4322	36.5
050815 12x2Gy	Ctl+ FS -FDG 1	64005	81593		138102	188917	168	33.3
050815 12x2Gy	Ctl+ FS -FDG 2	66498	84296	130	137083	191931	196	34.4
050815 12x2Gy	Ctl+ FS -FDG 3	66395	85933	131	136893	192112	166	37.6
050815 12x2Gy	Ombre 1	62976	74720	1639	122177	187332	5881	10
050815 12x2Gy	Ombre 2	63854	77810	1431	125024	189048	5087	14.3
050815 12x2Gy	Ombre 3	63539	79522	1544	121647	192421	5063	15.6
050815 12x2Gy	Penombre 1	63065	77834	1817	137823	202619	6177	21.8
050815 12x2Gy	Penombre 2	60753	79133	1772	135339	203214	5644	20.5
050815 12x2Gy	Penombre 3
12x2Gy
	P1 FSC-A Mean	P1 SSC-A Mean	P4 FITC-A Mean	P2 FSC-A Mean	P2 SSC-A Mean	P3 FITC-A Mean	%P2
Ctl NI +FDG 1	58325.3	56547	1057.67	129518	180447	4622.33	7.33333
Ctl+ FS +FDG 1	66540.3	87605.3	2251.67	132517	190879	4569	37.4667
Ombre 1	63456.3	77350.7	1538	122949	189600	5343.67	13.3
Penombre 1	61909	78483.5	1794.5	136581	202916	5910.5	21.15
Penombre 3	#DIV/0!	#DIV/0!	#DIV/0!	#DIV/0!	#DIV/0!	#DIV/0!	#DIV/0!
ET
	P1 FSC-A Mean	P1 SSC-A Mean	P4 FITC-A Mean	P2 FSC-A Mean	P2 SSC-A Mean	P3 FITC-A Mean
Ctl NI +FDG 1	692.532	588.248	49.2375	1027.53	1182.99	170.811	0.305505
Ctl+ FS +FDG 1	3321.95	1134.94	97.2848	1845.67	843.065	229.628	1.76163
Ombre 1	444.799	2433.73	104.13	1816.15	2589.07	465.499	2.93087
Penombre 1	1634.83	918.532	31.8198	1756.45	420.729	376.888	0.919239
Plein Champ 2	#DIV/0!	#DIV/0!	#DIV/0!	#DIV/0!	#DIV/0!	#DIV/0!	#DIV/0!
Probabilité
Ctl NI +FDG 1 vs Ctl FS+FDG	0.0137719	1.90603e-06	4.55147e-05	0.0697672	0.00024022	0.763032	8.19832e-06
Ctl NI + FDG vs Ombre	0.000417269	0.000135489	0.00194872	0.00549898	0.00509081	0.0653781	0.0247365
Ctl NI + FDG vs Penombre	0.037608	5.80258e-05	0.000358275	0.00981976	0.000145245	0.0120733	0.000127578
	P1 FSC-A Mean	P1 SSC-A Mean	P4 FITC-A Mean	P2 FSC-A Mean	P2 SSC-A Mean	P3 FITC-A Mean	% P2
Probabilité t test
Ctl NI +FDG 1 vs Ctl FS+FDG	*	***	***		***		***
Ctl NI + FDG vs Ombre	***	***	**	**	**		*
Ctl NI + FDG vs Penombre	*	***	***	**	***	*	***

## Sheet: 03-08-2015 10x2 Gy
Specimen Name	Tube Name	P1 FSC-A Mean	P1 SSC-A Mean	P4 FITC-A Mean	P2 FSC-A Mean	P2 SSC-A Mean	P3 FITC-A Mean	%P2
030815 10x2Gy	Ctl NI +FDG 1	63508	61913	957	143059	180522	4617	7.9
030815 10x2Gy	Ctl NI +FDG 2	63156	62289	917	144541	180874	4313	7
030815 10x2Gy	Ctl NI +FDG 3	62113	64355	933	138372	184518	4326	7.6
030815 10x2Gy	Ctl NI -FDG 1	63238	66111	453	135523	185131	165	7.4
030815 10x2Gy	Ctl NI -FDG 2	63465	62633		137404	183635	147	5.9
030815 10x2Gy	Ctl NI -FDG 3	63400	67372		135479	186895	140	7.6
030815 10x2Gy	Ctl+ FS +FDG 1	69396	86805	2733	129165	188333	5831	23.5
030815 10x2Gy	Ctl+ FS +FDG 2	67913	86447	2589	125305	189531	5478	22
030815 10x2Gy	Ctl+ FS +FDG 3	70601	88814	2726	128027	188796	5528	25.2
030815 10x2Gy	Ctl+ FS -FDG 1	66419	85953	185	137328	188185	175	23.5
030815 10x2Gy	Ctl+ FS -FDG 2	71846	89145	162	136988	186253	250	29.7
030815 10x2Gy	Ctl+ FS -FDG 3	70433	88928	134	136356	189383	160	29.1
030815 10x2Gy	Ombre 1	55554	60495	1163	129436	196059	5056	9.3
030815 10x2Gy	Ombre 2	55928	60539	1218	130953	193151	5439	9.8
030815 10x2Gy	Ombre 3	58208	60909	1379	134167	190403	6180	9.7
030815 10x2Gy	Penombre 1	56725	68858	1364	142822	205002	5594	17.9
030815 10x2Gy	Penombre 2
030815 10x2Gy	Penombre 3	59724	71521	1340	140734	204090	5301	18.9
030815 10x2Gy	Plein Champ 1	42310	59725	1534	160214	222481	6171	19
030815 10x2Gy	Plein Champ 2	42746	62491	1608	154772	223014	6416	21.5
030815 10x2Gy	Plein Champ 3	43821	62617	1796	155169	225199	6954	22.6
10x2Gy
	P1 FSC-A Mean	P1 SSC-A Mean	P4 FITC-A Mean	P2 FSC-A Mean	P2 SSC-A Mean	P3 FITC-A Mean	%P2
Ctl NI +FDG 1	62925.7	62852.3	935.667	141991	181971	4418.67	7.5
Ctl+ FS +FDG 1	69303.3	87355.3	2682.67	127499	188887	5612.33	23.5667
Ombre 1	56563.3	60647.7	1253.33	131519	193204	5558.33	9.6
Penombre 1	58224.5	70189.5	1352	141778	204546	5447.5	18.4
Penombre 3	42959	61611	1646	156718	223565	6513.67	21.0333
ET
	P1 FSC-A Mean	P1 SSC-A Mean	P4 FITC-A Mean	P2 FSC-A Mean	P2 SSC-A Mean	P3 FITC-A Mean
Ctl NI +FDG 1	725.463	1314.86	20.1329	3220.27	2212.49	171.885	0.458258
Ctl+ FS +FDG 1	1346.39	1275.86	81.1932	1983.43	604.124	191.014	1.60104
Ombre 1	1436.55	227.388	112.251	2415.69	2828.38	571.423	0.264575
Penombre 1	2120.61	1883.03	16.9706	1476.44	644.881	207.182	0.707107
Plein Champ 2	760.14	89.0955	132.936	280.721	1545.03	380.423	0.777817
Probabilité
Ctl NI +FDG 1 vs Ctl FS+FDG	0.00194891	2.05813e-05	3.48686e-06	0.00267501	0.00641653	0.00129544	7.5147e-05
Ctl NI + FDG vs Ombre	0.00238052	0.0458502	0.00849423	0.010776	0.00562403	0.0297087	0.00234654
Ctl NI + FDG vs Penombre	0.0323022	0.0133845	0.0001619	0.93814	0.000897041	0.00880274	0.000218306
Ctl NI + FDG vs Plein Champ	5.33283e-06	0.36333	0.000840489	0.00449066	1.07233e-05	0.00113733	0.000248486
	P1 FSC-A Mean	P1 SSC-A Mean	P4 FITC-A Mean	P2 FSC-A Mean	P2 SSC-A Mean	P3 FITC-A Mean	% P2
Probabilité t test
Ctl NI +FDG 1 vs Ctl FS+FDG	**	***	***	**	**	**	***
Ctl NI + FDG vs Ombre	**	*	**	*	**	*	**
Ctl NI + FDG vs Penombre	*	*	***		***	**	***
Ctl NI + FDG vs Plein Champ	***		**	**	***	***	***

## Sheet: 07-08-2015 14x2 Gy
Specimen Name	Tube Name	P1 FSC-A Mean	P1 SSC-A Mean	P4 FITC-A Mean	P2 FSC-A Mean	P2 SSC-A Mean	P3 FITC-A Mean	%P2
070815 14x2Gy	Ctl NI +FDG 1	59291	58855	1144	127558	174101	5156	7.4
070815 14x2Gy	Ctl NI +FDG 2	60435	59188	1076	129095	174617	5045	8
070815 14x2Gy	Ctl NI +FDG 3	60819	59303	1103	126295	175332	5201	8.4
070815 14x2Gy	Ctl NI -FDG 1	60558	60126	632	121372	170205	276	7.5
070815 14x2Gy	Ctl NI -FDG 2	62308	63021		128074	173391	140	9.9
070815 14x2Gy	Ctl NI -FDG 3	61259	63388		124473	173501	209	8.3
070815 14x2Gy	Ctl+ FS +FDG 1	61444	82268	2822	123628	181672	5409	34.4
070815 14x2Gy	Ctl+ FS +FDG 2	67183	88597	2889	121955	182802	5237	42.6
070815 14x2Gy	Ctl+ FS +FDG 3	59604	81886	2564	120090	181807	5295	30.3
070815 14x2Gy	Ctl+ FS -FDG 1	65299	83246	138	134570	184682	164	43.5
070815 14x2Gy	Ctl+ FS -FDG 2	64569	80096		138113	185070	162	41.1
070815 14x2Gy	Ctl+ FS -FDG 3	68782	84041	135	135962	182675	170	44.6
070815 14x2Gy	Ombre 1	54526	64446	1687	114269	180350	4886	11.3
070815 14x2Gy	Ombre 2	54424	65036	1707	116129	181354	4886	11.7
070815 14x2Gy	Ombre 3	54461	65989	1529	113612	179171	4265	11.9
070815 14x2Gy	Penombre 1	58160	80389	1893	127099	195509	4435	35.5
070815 14x2Gy	Penombre 2	57358	79803	1834	127402	193758	4476	33.5
070815 14x2Gy	Penombre 3	56191	80219	1729	125248	195309	4180	32
070815 14x2Gy	Plein Champ 1	40591	59438	1275	160859	224878	7254	21.6
070815 14x2Gy	Plein Champ 1	40179	60369	1221	158479	225356	7663	20.7
070815 14x2Gy	Plein Champ 1	40599	60899	1297	157891	227833	7398	20.6
14x2Gy
	P1 FSC-A Mean	P1 SSC-A Mean	P4 FITC-A Mean	P2 FSC-A Mean	P2 SSC-A Mean	P3 FITC-A Mean	%P2
Ctl NI +FDG 1	60181.7	59115.3	1107.67	127649	174683	5134	7.93333
Ctl+ FS +FDG 1	62743.7	84250.3	2758.33	121891	182094	5313.67	35.7667
Ombre 1	54470.3	65157	1641	114670	180292	4679	11.6333
Penombre 1	57236.3	80137	1818.67	126583	194859	4363.67	33.6667
Penombre 3	40456.3	60235.3	1264.33	159076	226022	7438.33	20.9667
ET
	P1 FSC-A Mean	P1 SSC-A Mean	P4 FITC-A Mean	P2 FSC-A Mean	P2 SSC-A Mean	P3 FITC-A Mean
Ctl NI +FDG 1	794.877	232.672	34.2394	1402.23	618.175	80.2932	0.503322
Ctl+ FS +FDG 1	3953.12	3769.17	171.599	1769.87	617.137	87.5062	6.26285
Ombre 1	51.6366	778.584	97.509	1305.54	1092.67	358.535	0.305505
Penombre 1	990.122	301.483	83.0682	1166.03	958.436	160.376	1.75594
Plein Champ 2	296.985	374.767	53.7401	415.779	1751.5	187.383	0.0707107
Probabilité
Ctl NI +FDG 1 vs Ctl FS+FDG	0.332887	0.000323297	8.2125e-05	0.0115377	0.000124828	0.0587806	0.00155125
Ctl NI + FDG vs Ombre	0.000241698	0.000209673	0.000866339	0.000301752	0.00150261	0.0985398	0.000404459
Ctl NI + FDG vs Penombre	0.0158933	7.17512e-08	0.000164137	0.368464	6.75973e-06	0.00174357	1.6738e-05
Ctl NI + FDG vs Plein Champ	2.0855e-06	0.0666265	0.00642478	1.33162e-05	8.0408e-07	5.6725e-05	7.10757e-06
	P1 FSC-A Mean	P1 SSC-A Mean	P4 FITC-A Mean	P2 FSC-A Mean	P2 SSC-A Mean	P3 FITC-A Mean	% P2
Probabilité t test
Ctl NI +FDG 1 vs Ctl FS+FDG		***	***	*	***		**
Ctl NI + FDG vs Ombre	***	***	***	***	**		***
Ctl NI + FDG vs Penombre	*	***	***		***	**	***
Ctl NI + FDG vs Plein Champ	***		**	***	***	***	***

## Sheet: BILAN
										Figure 2-source data 2
2x2Gy												P1 FSC-A Mean	P1 SSC-A Mean	P4 FITC-A Mean	P2 FSC-A Mean	P2 SSC-A Mean	P3 FITC-A Mean	%P2		ECART TYPE		P1 FSC-A Mean	P1 SSC-A Mean	P4 FITC-A Mean	P2 FSC-A Mean	P2 SSC-A Mean	P3 FITC-A Mean	%P2
	P1 FSC-A Mean	P1 SSC-A Mean	P4 FITC-A Mean	P2 FSC-A Mean	P2 SSC-A Mean	P3 FITC-A Mean	%P2					FSC "inf" pop	SSC "inf" pop	C12FDG inf" pop	FSC "sup" pop	SSC "sup" pop	C12FDG "sup" pop					FSC "inf" pop	SSC "inf" pop	C12FDG inf" pop	FSC "sup" pop	SSC "sup" pop	C12FDG "sup" pop
Ctl NI +FDG 1	59410	70013.3	722.667	124191	191373	2670.67	7.4			Ctl NI +FDG 1	2x2Gy	59410	70013.3	722.667	124191	191373	2670.67	7.4		Ctl NI +FDG 1	2x2Gy	852.17	251.703	17.9536	1806.84	1681.85	153.575	0.4
Ctl+ FS +FDG 1	62352	68060	1197	128619	179940	3444.67	8.33333				4x2Gy	61534	51549	980.333	135270	156795	3820.33	9.76667			4x2Gy	857.142	179.574	29.1433	2498.32	1211.22	149.874	0.981495
											5x2Gy	56920.3	50317.3	1031	132245	166109	4983.67	6.73333			5x2Gy	1025.55	908.774	30.315	1602.63	2904.7	250.049	0.981495
Ombre 1	61524.3	75273.7	789	122355	190735	2510.67	8.96667				7x2Gy	55419.3	48284.7	650.667	135422	165209	3470	9.93333			7x2Gy	1420.56	1888.19	13.2035	1281.3	2627.84	155.116	0.251661
Penombre 1	69788.3	85498.7	884.333	126701	187193	2331.33	12.2333				9x2Gy	54174.3	54488.3	858.667	129237	175050	4375.33	9.93333			9x2Gy	479.371	634	21.0079	771	2292.63	75.9232	0.251661
Plein Champ	70607.7	90774.7	1072	121665	187468	2455.67	13.5667				10x2Gy	62925.7	62852.3	935.667	141991	181971	4418.67	7.5			10x2Gy	725.463	1314.86	20.1329	3220.27	2212.49	171.885	0.458258
											12x2Gy	58325.3	56547	1057.67	129518	180447	4622.33	7.33333			12x2Gy	692.532	588.248	49.2375	1027.53	1182.99	170.811	0.305505
ET											14x2Gy	60181.7	59115.3	1107.67	127649	174683	5134	7.93333			14x2Gy	794.877	232.672	34.2394	1402.23	618.175	80.2932	0.503322
	P1 FSC-A Mean	P1 SSC-A Mean	P4 FITC-A Mean	P2 FSC-A Mean	P2 SSC-A Mean	P3 FITC-A Mean					15x2Gy	54491.3	54035.3	830	118269	165965	4222	7.33333			15x2Gy	626.826	238.162	51.1566	1564.67	1975.23	270.845	0.702377
Ctl NI +FDG 1	852.17	251.703	17.9536	1806.84	1681.85	153.575	0.4
Ctl+ FS +FDG 1	448.522	1564.18	87.43	1752.32	2812.53	179.11	1.50444			Ctl+ FS +FDG 1	2x2Gy	62352	68060	1197	128619	179940	3444.67	8.33333		Ctl+ FS +FDG 1	2x2Gy	448.522	1564.18	87.43	1752.32	2812.53	179.11	1.50444
											4x2Gy	67716.7	76580.3	2056.33	117770	160561	4516.33	18.8333			4x2Gy	843.024	1370.73	36.5011	1877.58	4412.29	167.739	3.25167
Ombre 1	933.484	1890.76	69.3758	733.925	329.248	189.859	0.321455				5x2Gy	65489.7	77747	2054.67	118685	167541	5014.67	24.0667			5x2Gy	1351.87	167.726	124.146	2373.32	478.737	477.979	0.929157
Penombre 1	420.545	381.175	64.0104	2003.32	825.552	163.638	1.26623				7x2Gy	69851.7	79012.7	1828.67	126112	160379	3559	44.5667			7x2Gy	1654.41	1184.49	137.613	2048.4	2688.89	239.33	1.44684
Plein Champ 2	512.652	526.087	63.6396	2297.39	1411.39	187.383	1.69706				9x2Gy	66627.3	90517.7	1931	119338	175312	3597.67	44.5667			9x2Gy	638.777	950.643	96.7626	1057.53	1864.81	235.996	1.44684
											10x2Gy	69303.3	87355.3	2682.67	127499	188887	5612.33	23.5667			10x2Gy	1346.39	1275.86	81.1932	1983.43	604.124	191.014	1.60104
4x2Gy											12x2Gy	66540.3	87605.3	2251.67	132517	190879	4569	37.4667			12x2Gy	3321.95	1134.94	97.2848	1845.67	843.065	229.628	1.76163
	P1 FSC-A Mean	P1 SSC-A Mean	P4 FITC-A Mean	P2 FSC-A Mean	P2 SSC-A Mean	P3 FITC-A Mean	%P2				14x2Gy	62743.7	84250.3	2758.33	121891	182094	5313.67	35.7667			14x2Gy	3953.12	3769.17	171.599	1769.87	617.137	87.5062	6.26285
Ctl NI +FDG 1	61534	51549	980.333	135270	156795	3820.33	9.76667				15x2Gy	58329.3	76608.7	2291.33	126966	181493	5140.67	48.6667			15x2Gy	2044.06	1507.09	19.6554	1705.15	2216.55	224.654	4.37759
Ctl+ FS +FDG 1	67716.7	76580.3	2056.33	117770	160561	4516.33	18.8333
										Ombre 1	2x2Gy	61524.3	75273.7	789	122355	190735	2510.67	8.96667		Ombre 1	2x2Gy	933.484	1890.76	69.3758	733.925	329.248	189.859	0.321455
Ombre 1	54079	57451.3	1135.67	114690	173340	4475.33	10.3				4x2Gy	54079	57451.3	1135.67	114690	173340	4475.33	10.3			4x2Gy	319.191	677.264	21.362	2554.05	2644.13	123.929	1.11355
Penombre 1	59230	69077.7	1654	112026	165372	4330	16.6667				5x2Gy	64310.3	68599.3	1068.33	135226	170647	3436	19.4667			5x2Gy	269.313	211.921	57.8734	2341.42	1074.45	221.705	0.61101
Plein Champ	70107.3	84089.3	1983	122193	169065	4017.33	40.5667				7x2Gy	58645.7	60372.3	1327	122186	172313	4692.67	17.8667			7x2Gy	1594.22	395.204	27.6225	4520.91	2251.32	62.7402	0.802081
											9x2Gy	57309	63313	1023.67	125842	181805	4151.33	17.8667			9x2Gy	432.785	760.066	29.2973	1355.15	938.383	64.3843	0.802081
ET											10x2Gy	56563.3	60647.7	1253.33	131519	193204	5558.33	9.6			10x2Gy	1436.55	227.388	112.251	2415.69	2828.38	571.423	0.264575
	P1 FSC-A Mean	P1 SSC-A Mean	P4 FITC-A Mean	P2 FSC-A Mean	P2 SSC-A Mean	P3 FITC-A Mean	%P2				12x2Gy	63456.3	77350.7	1538	122949	189600	5343.67	13.3			12x2Gy	444.799	2433.73	104.13	1816.15	2589.07	465.499	2.93087
Ctl NI +FDG 1	857.142	179.574	29.1433	2498.32	1211.22	149.874	0.981495				14x2Gy	54470.3	65157	1641	114670	180292	4679	11.6333			14x2Gy	51.6366	778.584	97.509	1305.54	1092.67	358.535	0.305505
Ctl+ FS +FDG 1	843.024	1370.73	36.5011	1877.58	4412.29	167.739	3.25167				15x2Gy	58906	68402	1250.67	118072	168373	4006	15.0333			15x2Gy	1022.17	617.158	61.5982	2336.38	1644	113.539	0.585947
Ombre 1	319.191	677.264	21.362	2554.05	2644.13	123.929	1.11355			Penombre 1	2x2Gy	69788.3	85498.7	884.333	126701	187193	2331.33	12.2333		Penombre 1	2x2Gy	420.545	381.175	64.0104	2003.32	825.552	163.638	1.26623
Penombre 1	1630.76	1234.4	41.3884	2184.4	3129.53	142.281	0.152753				4x2Gy	59230	69077.7	1654	112026	165372	4330	16.6667			4x2Gy	1630.76	1234.4	41.3884	2184.4	3129.53	142.281	0.152753
Plein Champ 2	629.325	52.3259	16.9706	1457.35	1236.73	2.82843	1.20208				5x2Gy	63181.7	69206.3	1417.33	134021	177353	4597	27.6			5x2Gy	1380.33	697.56	39.7157	3550.46	2112.4	171.974	4.17612
											7x2Gy	55748.3	66172.7	1539.67	126816	193061	5553.67	16.8333			7x2Gy	1483.66	181.946	137.961	2585.5	1654.33	350.942	6.13379
5x2Gy											9x2Gy	52677	63709	1237	126021	192665	5279.5	20.15			9x2Gy	151.321	1896.46	45.2548	1627.76	2551.24	98.2878	3.04056
	P1 FSC-A Mean	P1 SSC-A Mean	P4 FITC-A Mean	P2 FSC-A Mean	P2 SSC-A Mean	P3 FITC-A Mean	%P2				10x2Gy	58224.5	70189.5	1352	141778	204546	5447.5	18.4			10x2Gy	2120.61	1883.03	16.9706	1476.44	644.881	207.182	0.707107
Ctl NI +FDG 1	56920.3	50317.3	1031	132245	166109	4983.67	6.73333				12x2Gy	61909	78483.5	1794.5	136581	202916	5910.5	21.15			12x2Gy	1634.83	918.532	31.8198	1756.45	420.729	376.888	0.919239
Ctl+ FS +FDG 1	65489.7	77747	2054.67	118685	167541	5014.67	24.0667				14x2Gy	57236.3	80137	1818.67	126583	194859	4363.67	33.6667			14x2Gy	990.122	301.483	83.0682	1166.03	958.436	160.376	1.75594
											15x2Gy	59939	72974	1727.67	132065	183989	4875	34.7			15x2Gy	1001.12	933.353	108.611	1456.99	3376.54	147.224	3.79868
Ombre 1	64310.3	68599.3	1068.33	135226	170647	3436	19.4667
Penombre 1	63181.7	69206.3	1417.33	134021	177353	4597	27.6			Plein Champ 2	2x2Gy	70607.7	90774.7	1072	121665	187468	2455.67	13.5667		Plein Champ 2	2x2Gy	512.652	526.087	63.6396	2297.39	1411.39	187.383	1.69706
Penombre 3	57232.3	71294.3	1740.33	143835	185990	4044	43.1				4x2Gy	70107.3	84089.3	1983	122193	169065	4017.33	40.5667			4x2Gy	629.325	52.3259	16.9706	1457.35	1236.73	2.82843	1.20208
											5x2Gy	57232.3	71294.3	1740.33	143835	185990	4044	43.1			5x2Gy	1200.67	2908.33	29.6985	3686.15	5316.74	171.827	7.56604
ET											7x2Gy	47338.7	73305.7	2047.67	149081	210444	5219	29.7333			7x2Gy	4208.7	3751.2	337.29	12921	17213.1	926.31	8.90955
	P1 FSC-A Mean	P1 SSC-A Mean	P4 FITC-A Mean	P2 FSC-A Mean	P2 SSC-A Mean	P3 FITC-A Mean					9x2Gy	42570.3	61952.7	1682	135008	211911	6136	29.7333			9x2Gy	2610.64	41.0122	130.815	7076.72	1119.35	248.902	7.52485
Ctl NI +FDG 1	1025.55	908.774	30.315	1602.63	2904.7	250.049	0.981495				10x2Gy	42959	61611	1646	156718	223565	6513.67	21.0333			10x2Gy	760.14	89.0955	132.936	280.721	1545.03	380.423	0.777817
Ctl+ FS +FDG 1	1351.87	167.726	124.146	2373.32	478.737	477.979	0.929157				12x2Gy	#DIV/0!	#DIV/0!	#DIV/0!	#DIV/0!	#DIV/0!	#DIV/0!	#DIV/0!			12x2Gy	#DIV/0!	#DIV/0!	#DIV/0!	#DIV/0!	#DIV/0!	#DIV/0!	#DIV/0!
											14x2Gy	40456.3	60235.3	1264.33	159076	226022	7438.33	20.9667			14x2Gy	296.985	374.767	53.7401	415.779	1751.5	187.383	0.0707107
Ombre 1	269.313	211.921	57.8734	2341.42	1074.45	221.705	0.61101				15x2Gy	37631	53201	1162.67	148272	215891	7650	18.1333			15x2Gy	478.004	2371.64	120.915	3547.55	55.1543	181.726	1.55563
Penombre 1	1380.33	697.56	39.7157	3550.46	2112.4	171.974	4.17612
Plein Champ 2	1200.67	2908.33	29.6985	3686.15	5316.74	171.827	7.56604
7x2Gy
	P1 FSC-A Mean	P1 SSC-A Mean	P4 FITC-A Mean	P2 FSC-A Mean	P2 SSC-A Mean	P3 FITC-A Mean	%P2
Ctl NI +FDG 1	55419.3	48284.7	650.667	135422	165209	3470	9.93333
Ctl+ FS +FDG 1	69851.7	79012.7	1828.67	126112	160379	3559	44.5667
Ombre 1	58645.7	60372.3	1327	122186	172313	4692.67	17.8667
Penombre 1	55748.3	66172.7	1539.67	126816	193061	5553.67	16.8333
Penombre 3	47338.7	73305.7	2047.67	149081	210444	5219	29.7333
ET
	P1 FSC-A Mean	P1 SSC-A Mean	P4 FITC-A Mean	P2 FSC-A Mean	P2 SSC-A Mean	P3 FITC-A Mean
Ctl NI +FDG 1	1420.56	1888.19	13.2035	1281.3	2627.84	155.116	0.251661
Ctl+ FS +FDG 1	1654.41	1184.49	137.613	2048.4	2688.89	239.33	1.44684
Ombre 1	1594.22	395.204	27.6225	4520.91	2251.32	62.7402	0.802081
Penombre 1	1483.66	181.946	137.961	2585.5	1654.33	350.942	6.13379
Plein Champ 2	4208.7	3751.2	337.29	12921	17213.1	926.31	8.90955
9x2Gy
	P1 FSC-A Mean	P1 SSC-A Mean	P4 FITC-A Mean	P2 FSC-A Mean	P2 SSC-A Mean	P3 FITC-A Mean	%P2
Ctl NI +FDG 1	54174.3	54488.3	858.667	129237	175050	4375.33	9.93333
Ctl+ FS +FDG 1	66627.3	90517.7	1931	119338	175312	3597.67	44.5667
Ombre 1	57309	63313	1023.67	125842	181805	4151.33	17.8667
Penombre 1	52677	63709	1237	126021	192665	5279.5	20.15
Penombre 3	42570.3	61952.7	1682	135008	211911	6136	29.7333
ET
	P1 FSC-A Mean	P1 SSC-A Mean	P4 FITC-A Mean	P2 FSC-A Mean	P2 SSC-A Mean	P3 FITC-A Mean
Ctl NI +FDG 1	479.371	634	21.0079	771	2292.63	75.9232	0.251661
Ctl+ FS +FDG 1	638.777	950.643	96.7626	1057.53	1864.81	235.996	1.44684
Ombre 1	432.785	760.066	29.2973	1355.15	938.383	64.3843	0.802081
Penombre 1	151.321	1896.46	45.2548	1627.76	2551.24	98.2878	3.04056
Plein Champ 2	2610.64	41.0122	130.815	7076.72	1119.35	248.902	7.52485
10x2Gy
	P1 FSC-A Mean	P1 SSC-A Mean	P4 FITC-A Mean	P2 FSC-A Mean	P2 SSC-A Mean	P3 FITC-A Mean	%P2
Ctl NI +FDG 1	62925.7	62852.3	935.667	141991	181971	4418.67	7.5
Ctl+ FS +FDG 1	69303.3	87355.3	2682.67	127499	188887	5612.33	23.5667
Ombre 1	56563.3	60647.7	1253.33	131519	193204	5558.33	9.6
Penombre 1	58224.5	70189.5	1352	141778	204546	5447.5	18.4
Plein Champ	42959	61611	1646	156718	223565	6513.67	21.0333
ET
	P1 FSC-A Mean	P1 SSC-A Mean	P4 FITC-A Mean	P2 FSC-A Mean	P2 SSC-A Mean	P3 FITC-A Mean
Ctl NI +FDG 1	725.463	1314.86	20.1329	3220.27	2212.49	171.885	0.458258
Ctl+ FS +FDG 1	1346.39	1275.86	81.1932	1983.43	604.124	191.014	1.60104
Ombre 1	1436.55	227.388	112.251	2415.69	2828.38	571.423	0.264575
Penombre 1	2120.61	1883.03	16.9706	1476.44	644.881	207.182	0.707107
Plein Champ 2	760.14	89.0955	132.936	280.721	1545.03	380.423	0.777817
12x2Gy
	P1 FSC-A Mean	P1 SSC-A Mean	P4 FITC-A Mean	P2 FSC-A Mean	P2 SSC-A Mean	P3 FITC-A Mean	%P2
Ctl NI +FDG 1	58325.3	56547	1057.67	129518	180447	4622.33	7.33333
Ctl+ FS +FDG 1	66540.3	87605.3	2251.67	132517	190879	4569	37.4667
Ombre 1	63456.3	77350.7	1538	122949	189600	5343.67	13.3
Penombre 1	61909	78483.5	1794.5	136581	202916	5910.5	21.15
Penombre 3	#DIV/0!	#DIV/0!	#DIV/0!	#DIV/0!	#DIV/0!	#DIV/0!	#DIV/0!
ET
	P1 FSC-A Mean	P1 SSC-A Mean	P4 FITC-A Mean	P2 FSC-A Mean	P2 SSC-A Mean	P3 FITC-A Mean
Ctl NI +FDG 1	692.532	588.248	49.2375	1027.53	1182.99	170.811	0.305505
Ctl+ FS +FDG 1	3321.95	1134.94	97.2848	1845.67	843.065	229.628	1.76163
Ombre 1	444.799	2433.73	104.13	1816.15	2589.07	465.499	2.93087
Penombre 1	1634.83	918.532	31.8198	1756.45	420.729	376.888	0.919239
Plein Champ 2	#DIV/0!	#DIV/0!	#DIV/0!	#DIV/0!	#DIV/0!	#DIV/0!	#DIV/0!
14x2Gy
	P1 FSC-A Mean	P1 SSC-A Mean	P4 FITC-A Mean	P2 FSC-A Mean	P2 SSC-A Mean	P3 FITC-A Mean	%P2
Ctl NI +FDG 1	60181.7	59115.3	1107.67	127649	174683	5134	7.93333
Ctl+ FS +FDG 1	62743.7	84250.3	2758.33	121891	182094	5313.67	35.7667
Ombre 1	54470.3	65157	1641	114670	180292	4679	11.6333
Penombre 1	57236.3	80137	1818.67	126583	194859	4363.67	33.6667
Penombre 3	40456.3	60235.3	1264.33	159076	226022	7438.33	20.9667
ET
	P1 FSC-A Mean	P1 SSC-A Mean	P4 FITC-A Mean	P2 FSC-A Mean	P2 SSC-A Mean	P3 FITC-A Mean
Ctl NI +FDG 1	794.877	232.672	34.2394	1402.23	618.175	80.2932	0.503322
Ctl+ FS +FDG 1	3953.12	3769.17	171.599	1769.87	617.137	87.5062	6.26285
Ombre 1	51.6366	778.584	97.509	1305.54	1092.67	358.535	0.305505
Penombre 1	990.122	301.483	83.0682	1166.03	958.436	160.376	1.75594
Plein Champ 2	296.985	374.767	53.7401	415.779	1751.5	187.383	0.0707107
15x2Gy
	P1 FSC-A Mean	P1 SSC-A Mean	P4 FITC-A Mean	P2 FSC-A Mean	P2 SSC-A Mean	P3 FITC-A Mean	%P2
Ctl NI +FDG 1	54491.3	54035.3	830	118269	165965	4222	7.33333
Ctl+ FS +FDG 1	58329.3	76608.7	2291.33	126966	181493	5140.67	48.6667
Ombre 1	58906	68402	1250.67	118072	168373	4006	15.0333
Penombre 1	59939	72974	1727.67	132065	183989	4875	34.7
Penombre 3	37631	53201	1162.67	148272	215891	7650	18.1333
ET
	P1 FSC-A Mean	P1 SSC-A Mean	P4 FITC-A Mean	P2 FSC-A Mean	P2 SSC-A Mean	P3 FITC-A Mean
Ctl NI +FDG 1	626.826	238.162	51.1566	1564.67	1975.23	270.845	0.702377
Ctl+ FS +FDG 1	2044.06	1507.09	19.6554	1705.15	2216.55	224.654	4.37759
Ombre 1	1022.17	617.158	61.5982	2336.38	1644	113.539	0.585947
Penombre 1	1001.12	933.353	108.611	1456.99	3376.54	147.224	3.79868
Plein Champ 2	478.004	2371.64	120.915	3547.55	55.1543	181.726	1.55563

[truncated: 1 more sheets: Feuil1]
