# Supplementary material for: The out-of-field dose in radiation therapy induces delayed tumorigenesis by senescence evasion
Source: eLife. 2022 Mar 18;11:e67190. doi: 10.7554/eLife.67190 (PMC8933005; doi:10.7554/eLife.67190)
Supplement: Figure 3—figure supplement 2—source data 1. [file elife-67190-fig3-figsupp2-data1.xlsx]

## Sheet: DATA
ɣH2Ax (rouge)					Margin (in mm)									53BP1 (vert)					Margin (in mm)
Image	Non-irradiated		PTV		-5 to +20		+22 to +47							Image	Non-irradiated		PTV		-5 to +20		+22 to +47
1	1	1	1	5	1	0	1	0						1	1	22	1	14	1	5	1	0
	2	5	2	23	2	6	2	0							2	5	2	12	2	3	2	34
	3	0	3	2	3	5	3	0							3	1	3	9	3	5	3	7
	4	1			4	2	4	10							4	19			4	9	4	8
	5	0			5	0	5	7							5	22			5	4	5	7
2	1	12	1	5	1	1	1	15						2	1	15	1	18	1	3	1	12
	2	0	2	22	2	10	2	0							2	36	2	10	2	7	2	4
	3	0	3	38	3	19	3	3							3	15	3	33	3	5	3	5
	4	0	4	19	4	2	4	0							4	19	4	17	4	4	4	9
	5	0			5	18									5	2			5	6
	6	0			6	2									6	4			6	4
	7	0													7	7
3	1	12	1	33	1	1	1	3						3	1	0	1	40	1	19	1	6
	2	0	2	27	2	19	2	0							2	0	2	26	2	3	2	0
	3	0	3	4	3	0	3	10							3	14	3	11	3	5	3	3
	4	0	4	18	4	7	4	28							4	4	4	2	4	17	4	21
	5	0			5	0	5	31							5	12			5	3	5	12
	6	26			6	0									6	3			6	3
					7	4													7	5
					8	12													8	7
4	1	7	1	1	1	1	1	25						4	1	8	1	6	1	6	1	5
	2	0	2	1	2	1	2	9							2	3	2	2	2	2	2	43
	3	0	3	8	3	8	3	15							3	0	3	15	3	15	3	27
	4	5	4	1	4	1									4	1	4	15	4	15
			5	9	5	9											5	5	5	5
			6	7	6	7											6	10	6	10
5	1	0	1	42	1	4	1	1						5	1	2	1	13	1	4	1	5
	2	22	2	42	2	1	2	0							2	12	2	17	2	27	2	11
	3	1	3	3	3	7									3	15	3	8	3	5
					4	6													4	8
					5	8													5	10
					6	0													6	10
					7	5													7	10
6	1	2	1	19	1	11	1	17						6	1	12	1	19	1	6	1	16
	2	3	2	87	2	14	2	7							2	32	2	87	2	16	2	3
	3	0	3	31	3	3	3	1							3	0	3	31	3	3	3	4
	4	0			4	1	4	6							4	37			4	6	4	1
					5	22	5	0											5	18	5	12
					6	7	6	0											6	8	6	3
					7	0													7	2
					8	2													8	8
7	1	22	1	32	1	1	1	18						7	1	6	1	2	1	9	1	14
	2	12	2	12	2	11	2	6							2	8	2	3	2	6	2	18
	3	0	3	6	3	2	3	27							3	23	3	5	3	3	3	19
	4	0	4	15	4	2	4	5							4	11	4	13	4	6	4	4
			5	32	5	5											5	17	5	7
			6	0	6	8											6	13	6	9
			7	22	7	12											7	13	7	9
					8	2													8	3
					9	5													9	3
					10	1				ɣH2Ax (rouge)									10	4				53BP1 (vert)
8	1	3	1	33	1	19	1	0		NI	PTV	PN	O	8	1	5	1	32	1	23	1	12		NI	PTV	PN	O
	2	1	2	6	2	17	2	0	1	7	30	13	17		2	13	2	11	2	12	2	6	1	69	35	26	56
	3	1	3	9	3	12	3	0	2	12	84	52	18		3	1	3	11	3	14	3	8	2	98	78	29	30
	4	3	4	1	4	3	4	0	3	38	82	43	72		4	1	4	19	4	4	4	16	3	33	79	62	42
			5	1	5	2			4	12	27	27	49				5	8	5	10			4	12	53	53	75
			6	1	6	8			5	23	87	31	1				6	20	6	6			5	29	38	74	16
			7	0	7	2			6	5	137	60	31				7	4	7	11			6	81	137	67	39
					8	0			7	34	119	49	56						8	4			7	48	66	59	55
9	1	0	1	8			1	5	8	8	51	63	0	9	1	0	1	16			1	5	8	20	105	84	42
	2	0	2	13			2	1	9	11	37	0	9		2	4	2	20			2	2	9	23	70	0	33
	3	1	3	13			3	2	10	0	104	0	45		3	19	3	20			3	15	10	0	86	0	57
	4	10	4	3			4	0	11	0	87	0	28		4	0	4	14			4	7	11	0	67	0	40
	5	0					5	1	12	0	51	0	72		5	0					5	4	12	0	53	0	39
10			1	20			1	4	13	0	0	0	67	10			1	14			1	10	13	0	0	0	79
			2	6			2	7									2	15			2	9
			3	47			3	17									3	27			3	15
			4	31			4	16									4	30			4	14
							5	1													5	9
11			1	25			1	10						11			1	24			1	10
			2	30			2	2									2	14			2	7
			3	22			3	0									3	22			3	3
			4	10			4	1									4	7			4	3
							5	0													5	6
							6	11													6	10
							7	4													7	1
12			1	39			1	13						12			1	17			1	11
			2	9			2	17									2	16			2	1
			3	2			3	4									3	12			3	14
			4	1			4	38									4	8			4	13
			5	0													5	0
13							1	8						13							1	15
							2	3													2	14
							3	5													3	4
							4	0													4	7
							5	51													5	39
Moyenne		3.57143		16.5926		5.82759		7.88136						Moyenne		9.83333		16.0556		7.82759		10.2203
Ecart-type		6.5821		16.6354		5.89421		10.5815						Ecart-type		10.0509		13.0549		5.35785		8.74163
Images			Mask	ZeroZero	Rtotal	m	b	Ch1 thresh	Ch2 thresh	Rcoloc	R<threshold	M1	M2	tM1	tM2	Ncoloc	%Volume	%Ch1 Vol	%Ch2 Vol	%Ch1 Int	%Ch2 Int	%Ch1 Int>tresh	%Ch1 Int>tresh
NI 1.jpeg (red) & NI 1.jpeg (green)			ROI0	excl.	0.551	2.243	-6	4	3	0.4304	-0.003	0.679	0.9791	0.4505	0.8464	540497	0.0812	0.2453	0.5481	0.3886	0.7647	0.5655	0.855
NI 2.jpeg (red) & NI 2.jpeg (green)			ROI0	excl.	0.651	1.506	-6	6	3	0.5534	-0.013	0.6415	0.9842	0.4097	0.8553	602744	0.0906	0.2901	0.5969	0.3537	0.7642	0.5883	0.8555
NI 3.jpeg (red) & NI 3.jpeg (green)			ROI0	excl.	0.596	1.152	-3.9	5	2	0.4362	-0.015	0.6346	0.9905	0.5009	0.9205	657028	0.0987	0.2833	0.5539	0.4361	0.8327	0.6557	0.8882
NI 4.jpeg (red) & NI 4.jpeg (green)			ROI0	excl.	0.814	1.201	-4	5	2	0.7615	0.102	0.5971	0.9997	0.4372	0.9448	613982	0.0922	0.2298	0.524	0.353	0.8235	0.5236	0.9003
NI 5.jpeg (red) & NI 5.jpeg (green)			ROI0	excl.	0.731	1.392	-2.2	4	3	0.6994	0.002	0.6965	0.9788	0.3919	0.7601	412282	0.0619	0.1938	0.4409	0.3158	0.6374	0.4995	0.79
NI 6.jpeg (red) & NI 6.jpeg (green)			ROI0	excl.	0.656	3.182	-18.3	7	4	0.5786	0.023	0.842	0.9937	0.3205	0.867	751657	0.1129	0.2053	0.593	0.2426	0.6419	0.3479	0.8494
NI 7.jpeg (red) & NI 7.jpeg (green)			ROI0	excl.	0.761	1.077	-2.4	4	2	0.7145	-0.02	0.7233	0.9934	0.587	0.8868	883657	0.1328	0.2708	0.4885	0.4813	0.7914	0.5944	0.8465
NI 8.jpeg (red) & NI 8.jpeg (green)			ROI0	excl.	0.745	0.701	-0.8	4	2	0.6766	0.02	0.629	0.9919	0.5023	0.8147	464482	0.0698	0.2362	0.4104	0.4174	0.7223	0.6215	0.794
NI 9.jpeg (red) & NI 9.jpeg (green)			ROI0	excl.	0.536	1.181	-6.3	7	2	0.4083	-0.018	0.5424	0.9926	0.3995	0.8719	658377	0.0989	0.3469	0.5119	0.3106	0.7844	0.5962	0.8382
O 1.jpeg (red) & O 1.jpeg (green)			ROI0	excl.	0.688	2.574	-4.1	3	4	0.567	0.023	0.4791	0.9737	0.2761	0.8819	213295	0.032	0.1168	0.6566	0.2555	0.759	0.4306	0.8907
O 2.jpeg (red) & O 2.jpeg (green)			ROI0	excl.	0.609	1.058	-3.3	6	3	0.452	-0.004	0.6103	0.9907	0.3851	0.816	422556	0.0635	0.2857	0.489	0.3303	0.7258	0.6515	0.817
O 3.jpeg (red) & O 3.jpeg (green)			ROI0	excl.	0.748	1.021	-4.1	4	0	0.7527	0.011	0.6107	0.999	1	0.9639	2632863	0.3955	0.4437	0.3955	0.5821	0.9341	0.6072	0.9341
O 4.jpeg (red) & O 4.jpeg (green)			ROI0	excl.	0.66	0.854	-0.1	6	5	0.5727	0.012	0.8724	0.9656	0.5856	0.6278	639399	0.0961	0.4704	0.3895	0.4839	0.5368	0.7797	0.6609
O 5.jpeg (red) & O 5.jpeg (green)			ROI0	excl.	0.522	0.8	-4.4	9	3	0.4688	0.014	0.7054	0.9985	0.4179	0.6063	571440	0.0858	0.3504	0.2892	0.2215	0.4866	0.5157	0.5756
O 6.jpeg (red) & O 6.jpeg (green)			ROI0	excl.	0.66	3.019	-9.1	4	3	0.5936	0	0.5696	0.9934	0.3855	0.9055	555593	0.0835	0.1784	0.6461	0.3473	0.8366	0.4617	0.9034
O 7.jpeg (red) & O 7.jpeg (green)			ROI0	excl.	0.871	0.894	-0.7	3	2	0.8483	-0.015	0.6449	0.9874	0.5269	0.9004	469278	0.0705	0.2125	0.4965	0.4687	0.8014	0.6322	0.8696
O 8.jpeg (red) & O 8.jpeg (green)			ROI0	excl.	0.462	6.798	-8.6	3	12	0.184	0.001	0.7491	0.8833	0.4187	0.7132	135068	0.0203	0.4708	0.6014	0.3954	0.6404	0.7477	0.7873
O 9.jpeg (red) & O 9.jpeg (green)			ROI0	excl.	0.666	2.002	-4	3	2	0.5604	-0.019	0.5772	0.984	0.4597	0.9016	355344	0.0534	0.2472	0.4686	0.406	0.8317	0.6656	0.884
O 10.jpeg (red) & O 10.jpeg (green)			ROI0	excl.	0.744	1.814	-2.4	3	3	0.6502	-0.007	0.6621	0.9808	0.5199	0.9022	417284	0.0627	0.2731	0.6207	0.4899	0.8339	0.7166	0.9
O 11.jpeg (red) & O 11.jpeg (green)			ROI0	excl.	0.745	1.803	-2.4	3	3	0.6496	-0.008	0.6799	0.9826	0.5449	0.9001	381093	0.0573	0.3326	0.6135	0.516	0.8428	0.7939	0.9124
O 12.jpeg (red) & O 12.jpeg (green)			ROI0	excl.	0.673	1.32	-2	3	2	0.5585	-0.017	0.6061	0.9824	0.4885	0.8832	359353	0.054	0.2308	0.4829	0.4373	0.798	0.6638	0.8664
O 13.jpeg (red) & O 13.jpeg (green)			ROI0	excl.	0.826	2.402	-3.2	3	4	0.7719	0.024	0.6943	0.9835	0.5388	0.8983	446293	0.067	0.3628	0.6105	0.5008	0.8295	0.7601	0.9063
PC 1.jpeg (red) & PC 1.jpeg (green)			ROI0	excl.	0.678	0.65	-6.8	6	-3	0.6811	0.012	0.5143	1	1	0.9997	6414198	0.9636	0.9796	0.9636	0.9849	0.9989	0.9906	0.9989
PC 2.jpeg (red) & PC 2.jpeg (green)			ROI0	excl.	0.781	0.833	-4	7	2	0.7399	0.017	0.5439	0.9981	0.3932	0.7851	492415	0.074	0.3556	0.3769	0.2819	0.6807	0.6365	0.7474
PC 3.jpeg (red) & PC 3.jpeg (green)			ROI0	excl.	0.857	0.798	-1.2	4	2	0.8228	0.008	0.6555	0.9923	0.5305	0.8525	542177	0.0815	0.2111	0.4625	0.456	0.7553	0.6064	0.8221
PC 4.jpeg (red) & PC 4.jpeg (green)			ROI0	excl.	0.759	1.533	-2.6	4	4	0.6777	0.022	0.617	0.9759	0.4672	0.7876	374316	0.0562	0.3264	0.5063	0.4223	0.7162	0.7246	0.7991
PC 5.jpeg (red) & PC 5.jpeg (green)			ROI0	excl.	0.702	0.728	-0.9	4	2	0.6395	-0.031	0.6298	0.9735	0.5097	0.7899	514981	0.0774	0.218	0.4316	0.4275	0.6802	0.5896	0.7342
PC 6.jpeg (red) & PC 6.jpeg (green)			ROI0	excl.	0.869	1.115	-3.9	5	2	0.8277	0.027	0.7802	0.999	0.6943	0.9538	1119523	0.1682	0.4213	0.6066	0.6288	0.9032	0.7926	0.9308
PC 7.jpeg (red) & PC 7.jpeg (green)			ROI0	excl.	0.708	0.953	-4.6	7	2	0.6242	-0.011	0.5982	0.9992	0.4804	0.9193	831755	0.125	0.3114	0.5599	0.4008	0.8338	0.6033	0.8771
PC 8.jpeg (red) & PC 8.jpeg (green)			ROI0	excl.	0.535	2.703	-4.1	4	7	0.4186	0.018	0.7078	0.9148	0.4799	0.6992	332223	0.0499	0.521	0.5373	0.4332	0.6262	0.6958	0.7256
PC 9.jpeg (red) & PC 9.jpeg (green)			ROI0	excl.	0.771	1.045	-2.2	4	2	0.6853	0.009	0.6279	0.9916	0.5051	0.8964	450863	0.0677	0.1798	0.5149	0.4502	0.8248	0.5985	0.8814
PC 10.jpeg (red) & PC 10.jpeg (green)			ROI0	excl.	0.781	0.893	-0.6	4	3	0.7174	-0.012	0.7067	0.9752	0.5777	0.8108	558938	0.084	0.2728	0.5093	0.5268	0.7239	0.7092	0.7855
PC 11.jpeg (red) & PC 11.jpeg (green)			ROI0	excl.	0.816	0.995	-3	5	2	0.7671	0	0.648	0.9925	0.5248	0.8157	521242	0.0783	0.334	0.3657	0.4225	0.7133	0.7234	0.76
PC 12.jpeg (red) & PC 12.jpeg (green)			ROI0	excl.	0.721	1.443	-3.8	4	2	0.6369	-0.016	0.6133	0.9843	0.4949	0.8529	520674	0.0782	0.2383	0.4728	0.422	0.7778	0.6005	0.8225
PN.jpeg (red) & PN.jpeg (green)			ROI0	excl.	0.693	1.394	-0.8	3	3	0.6119	-0.014	0.7199	0.9681	0.5217	0.7898	371674	0.0558	0.3476	0.4539	0.4567	0.6884	0.7506	0.8179
PN 2.jpeg (red) & PN 2.jpeg (green)			ROI0	excl.	0.674	0.817	-0.5	3	2	0.5667	-0.011	0.7131	0.9815	0.6012	0.8362	432287	0.0649	0.3518	0.4135	0.5223	0.7396	0.7775	0.8188
PN 3.jpeg (red) & PN 3.jpeg (green)			ROI0	excl.	0.73	0.914	-0.7	3	2	0.5932	-0.014	0.8213	0.9835	0.7387	0.8537	379777	0.0571	0.5343	0.4101	0.6768	0.8048	0.9174	0.874
PN 4.jpeg (red) & PN 4.jpeg (green)			ROI0	excl.	0.763	1.037	-0.1	3	3	0.6346	0.022	0.806	0.9853	0.6852	0.8672	334603	0.0503	0.4756	0.5842	0.6546	0.8182	0.9054	0.919
PN 5.jpeg (red) & PN 5.jpeg (green)			ROI0	excl.	0.751	2.162	-1.3	3	5	0.6494	0.023	0.7159	0.9613	0.5035	0.8284	284459	0.0427	0.3318	0.5973	0.4733	0.7431	0.7781	0.875
PN 6.jpeg (red) & PN 6.jpeg (green)			ROI0	excl.	0.746	1.053	-0.2	5	5	0.5097	0.175	0.8468	0.9833	0.6717	0.7953	328071	0.0493	0.6159	0.5336	0.6347	0.7584	0.9308	0.8867
PN 7.jpeg (red) & PN 7.jpeg (green)			ROI0	excl.	0.75	1.424	-1.3	3	3	0.6251	0.016	0.7764	0.9867	0.6351	0.8905	463193	0.0696	0.3913	0.5829	0.5949	0.8282	0.8361	0.9153
PN 8.jpeg (red) & PN 8.jpeg (green)			ROI0	excl.	0.838	1.05	-0.2	3	3	0.7477	0.04	0.8402	0.989	0.7325	0.8917	424468	0.0638	0.4443	0.5577	0.6979	0.8398	0.9023	0.9246

## Sheet: Graph
Figure 3 – Figure supplement 2-source data 1
H2AX	Non-irradiated	PTV	Margin (in mm)			53BP1	Non-irradiated	PTV	Margin (in mm)				Non-irradiated	PTV	Margin (in mm)
			-5 to +20	+22 to +47					-5 to +20	+22 to +47					-5 to +20	+22 to +47
Mean	3.57143	16.5926	5.82759	7.88136		Mean	9.83333	16.0556	7.82759	10.2203		Mean	0.974702	5.025	1.67976	2.94853
SD	6.5821	16.6354	5.89421	10.5815		SD	10.0509	13.0549	5.35785	8.74163		SD	0.820144	3.55138	0.877953	3.86292
		***	*	*				***	NS	NS				**	NS	NS

## Sheet: JaCop PC
**************************************************
Image A: C1-PC 1.lsm
Image B: C2-PC 1.lsm
Overlap Coefficient:
r=0.501
r^2=k1xk2:
k1=1.383
k2=0.181
Using thresholds (thrA=361 and thrB=1792)
Overlap Coefficient:
r=0.0
r^2=k1xk2:
k1=0.0
k2=0.0
Manders' Coefficients (original):
M1=0.999 (fraction of A overlapping B)
M2=0.999 (fraction of B overlapping A)
Manders' Coefficients (using threshold value of 361 for imgA and 1792 for imgB):
M1=0.0 (fraction of A overlapping B)
M2=0.0 (fraction of B overlapping A)
Cytofluorogram's parameters:
a: 1.886
b: -14.377
Correlation coefficient: 0.386
Colocalization based on distance between centres of mass
Threshold for Image A=361; Image B=1792
Particles size between 20 & 6656400
Image A: 0 centre(s) colocalizing out of 1
Image B: 0 centre(s) colocalizing out of 13
Colocalization based on centres of mass-particles coincidence
Threshold for Image A=361; Image B=1792
Particles size between 20 & 6656400
Image A: 0 centre(s) colocalizing out of 1
Image B: 0 centre(s) colocalizing out of 13
**************************************************
Image A: C1-PC 2.lsm
Image B: C2-PC 2.lsm
Overlap Coefficient:
r=0.688
r^2=k1xk2:
k1=2.654
k2=0.178
Using thresholds (thrA=366 and thrB=1792)
Overlap Coefficient:
r=0.931
r^2=k1xk2:
k1=5.003
k2=0.173
Manders' Coefficients (original):
M1=0.999 (fraction of A overlapping B)
M2=0.999 (fraction of B overlapping A)
Manders' Coefficients (using threshold value of 366 for imgA and 1792 for imgB):
M1=0.41 (fraction of A overlapping B)
M2=0.448 (fraction of B overlapping A)
Cytofluorogram's parameters:
a: 2.977
b: -21.28
Correlation coefficient: 0.654
Colocalization based on distance between centres of mass
Threshold for Image A=366; Image B=1792
Particles size between 20 & 6656400
Image A: 21 centre(s) colocalizing out of 75
Image B: 21 centre(s) colocalizing out of 71
Colocalization based on centres of mass-particles coincidence
Threshold for Image A=366; Image B=1792
Particles size between 20 & 6656400
Image A: 28 centre(s) colocalizing out of 75
Image B: 28 centre(s) colocalizing out of 71
**************************************************
Image A: C1-PC 3.lsm
Image B: C2-PC 3.lsm
Overlap Coefficient:
r=0.809
r^2=k1xk2:
k1=2.847
k2=0.229
Using thresholds (thrA=389 and thrB=1755)
Overlap Coefficient:
r=0.964
r^2=k1xk2:
k1=4.614
k2=0.201
Manders' Coefficients (original):
M1=0.999 (fraction of A overlapping B)
M2=0.999 (fraction of B overlapping A)
Manders' Coefficients (using threshold value of 389 for imgA and 1755 for imgB):
M1=0.405 (fraction of A overlapping B)
M2=0.696 (fraction of B overlapping A)
Cytofluorogram's parameters:
a: 3.134
b: -27.26
Correlation coefficient: 0.8
Colocalization based on distance between centres of mass
Threshold for Image A=389; Image B=1755
Particles size between 20 & 6656400
Image A: 9 centre(s) colocalizing out of 66
Image B: 9 centre(s) colocalizing out of 82
Colocalization based on centres of mass-particles coincidence
Threshold for Image A=389; Image B=1755
Particles size between 20 & 6656400
Image A: 27 centre(s) colocalizing out of 66
Image B: 26 centre(s) colocalizing out of 82
**************************************************
Image A: C1-PC 4.lsm
Image B: C2-PC 4.lsm
Overlap Coefficient:
r=0.681
r^2=k1xk2:
k1=2.343
k2=0.197
Using thresholds (thrA=366 and thrB=1755)
Overlap Coefficient:
r=0.93
r^2=k1xk2:
k1=4.571
k2=0.189
Manders' Coefficients (original):
M1=0.999 (fraction of A overlapping B)
M2=0.999 (fraction of B overlapping A)
Manders' Coefficients (using threshold value of 366 for imgA and 1755 for imgB):
M1=0.256 (fraction of A overlapping B)
M2=0.504 (fraction of B overlapping A)
Cytofluorogram's parameters:
a: 2.375
b: -4.094
Correlation coefficient: 0.643
Colocalization based on distance between centres of mass
Threshold for Image A=366; Image B=1755
Particles size between 20 & 6656400
Image A: 11 centre(s) colocalizing out of 102
Image B: 11 centre(s) colocalizing out of 63
Colocalization based on centres of mass-particles coincidence
Threshold for Image A=366; Image B=1755
Particles size between 20 & 6656400
Image A: 36 centre(s) colocalizing out of 102
Image B: 29 centre(s) colocalizing out of 63
**************************************************
Image A: C1-PC 5.lsm
Image B: C2-PC 5.lsm
Overlap Coefficient:
r=0.684
r^2=k1xk2:
k1=2.422
k2=0.193
Using thresholds (thrA=392 and thrB=1792)
Overlap Coefficient:
r=0.963
r^2=k1xk2:
k1=5.148
k2=0.18
Manders' Coefficients (original):
M1=0.999 (fraction of A overlapping B)
M2=0.999 (fraction of B overlapping A)
Manders' Coefficients (using threshold value of 392 for imgA and 1792 for imgB):
M1=0.238 (fraction of A overlapping B)
M2=0.522 (fraction of B overlapping A)
Cytofluorogram's parameters:
a: 2.547
b: -9.623
Correlation coefficient: 0.634
Colocalization based on distance between centres of mass
Threshold for Image A=392; Image B=1792
Particles size between 20 & 6656400
Image A: 18 centre(s) colocalizing out of 69
Image B: 18 centre(s) colocalizing out of 57
Colocalization based on centres of mass-particles coincidence
Threshold for Image A=392; Image B=1792
Particles size between 20 & 6656400
Image A: 27 centre(s) colocalizing out of 69
Image B: 26 centre(s) colocalizing out of 57
**************************************************
Image A: C1-PC 7.lsm
Image B: C2-PC 7.lsm
Overlap Coefficient:
r=0.602
r^2=k1xk2:
k1=2.601
k2=0.139
Using thresholds (thrA=366 and thrB=1755)
Overlap Coefficient:
r=0.957
r^2=k1xk2:
k1=6.685
k2=0.137
Manders' Coefficients (original):
M1=0.999 (fraction of A overlapping B)
M2=0.999 (fraction of B overlapping A)
Manders' Coefficients (using threshold value of 366 for imgA and 1755 for imgB):
M1=0.224 (fraction of A overlapping B)
M2=0.146 (fraction of B overlapping A)
Cytofluorogram's parameters:
a: 2.678
b: -7.178
Correlation coefficient: 0.546
Colocalization based on distance between centres of mass
Threshold for Image A=366; Image B=1755
Particles size between 20 & 6656400
Image A: 4 centre(s) colocalizing out of 54
Image B: 4 centre(s) colocalizing out of 84
Colocalization based on centres of mass-particles coincidence
Threshold for Image A=366; Image B=1755
Particles size between 20 & 6656400
Image A: 18 centre(s) colocalizing out of 54
Image B: 12 centre(s) colocalizing out of 84
**************************************************
Image A: C1-PC 8.lsm
Image B: C2-PC 8.lsm
Overlap Coefficient:
r=0.548
r^2=k1xk2:
k1=1.842
k2=0.163
Using thresholds (thrA=370 and thrB=1792)
Overlap Coefficient:
r=0.935
r^2=k1xk2:
k1=4.385
k2=0.199
Manders' Coefficients (original):
M1=0.999 (fraction of A overlapping B)
M2=0.999 (fraction of B overlapping A)
Manders' Coefficients (using threshold value of 370 for imgA and 1792 for imgB):
M1=0.174 (fraction of A overlapping B)
M2=0.316 (fraction of B overlapping A)
Cytofluorogram's parameters:
a: 1.731
b: 14.384
Correlation coefficient: 0.477
Colocalization based on distance between centres of mass
Threshold for Image A=370; Image B=1792
Particles size between 20 & 6656400
Image A: 0 centre(s) colocalizing out of 72
Image B: 0 centre(s) colocalizing out of 103
Colocalization based on centres of mass-particles coincidence
Threshold for Image A=370; Image B=1792
Particles size between 20 & 6656400
Image A: 10 centre(s) colocalizing out of 72
Image B: 10 centre(s) colocalizing out of 103
**************************************************
Image A: C1-PC 9.lsm
Image B: C2-PC 9.lsm
Overlap Coefficient:
r=0.73
r^2=k1xk2:
k1=3.271
k2=0.163
Using thresholds (thrA=541 and thrB=1901)
Overlap Coefficient:
r=0.967
r^2=k1xk2:
k1=4.723
k2=0.198
Manders' Coefficients (original):
M1=0.999 (fraction of A overlapping B)
M2=0.999 (fraction of B overlapping A)
Manders' Coefficients (using threshold value of 541 for imgA and 1901 for imgB):
M1=0.481 (fraction of A overlapping B)
M2=0.199 (fraction of B overlapping A)
Cytofluorogram's parameters:
a: 3.6
b: -33.023
Correlation coefficient: 0.719
Colocalization based on distance between centres of mass
Threshold for Image A=541; Image B=1901
Particles size between 20 & 6656400
Image A: 5 centre(s) colocalizing out of 41
Image B: 5 centre(s) colocalizing out of 63
Colocalization based on centres of mass-particles coincidence
Threshold for Image A=541; Image B=1901
Particles size between 20 & 6656400
Image A: 27 centre(s) colocalizing out of 41
Image B: 20 centre(s) colocalizing out of 63
**************************************************
Image A: C1-PC 10.lsm
Image B: C2-PC 10.lsm
Overlap Coefficient:
r=0.755
r^2=k1xk2:
k1=2.8
k2=0.203
Using thresholds (thrA=571 and thrB=1755)
Overlap Coefficient:
r=0.963
r^2=k1xk2:
k1=4.308
k2=0.215
Manders' Coefficients (original):
M1=0.999 (fraction of A overlapping B)
M2=0.999 (fraction of B overlapping A)
Manders' Coefficients (using threshold value of 571 for imgA and 1755 for imgB):
M1=0.512 (fraction of A overlapping B)
M2=0.302 (fraction of B overlapping A)
Cytofluorogram's parameters:
a: 2.91
b: -13.478
Correlation coefficient: 0.727
Colocalization based on distance between centres of mass
Threshold for Image A=571; Image B=1755
Particles size between 20 & 6656400
Image A: 17 centre(s) colocalizing out of 62
Image B: 17 centre(s) colocalizing out of 110
Colocalization based on centres of mass-particles coincidence
Threshold for Image A=571; Image B=1755
Particles size between 20 & 6656400
Image A: 43 centre(s) colocalizing out of 62
Image B: 36 centre(s) colocalizing out of 110
**************************************************
Image A: C1-PC 11.lsm
Image B: C2-PC 11.lsm
Overlap Coefficient:
r=0.781
r^2=k1xk2:
k1=3.001
k2=0.203
Using thresholds (thrA=512 and thrB=1792)
Overlap Coefficient:
r=0.952
r^2=k1xk2:
k1=4.47
k2=0.202
Manders' Coefficients (original):
M1=0.999 (fraction of A overlapping B)
M2=0.999 (fraction of B overlapping A)
Manders' Coefficients (using threshold value of 512 for imgA and 1792 for imgB):
M1=0.408 (fraction of A overlapping B)
M2=0.353 (fraction of B overlapping A)
Cytofluorogram's parameters:
a: 3.184
b: -21.556
Correlation coefficient: 0.762
Colocalization based on distance between centres of mass
Threshold for Image A=512; Image B=1792
Particles size between 20 & 6656400
Image A: 7 centre(s) colocalizing out of 55
Image B: 7 centre(s) colocalizing out of 66
Colocalization based on centres of mass-particles coincidence
Threshold for Image A=512; Image B=1792
Particles size between 20 & 6656400
Image A: 29 centre(s) colocalizing out of 55
Image B: 25 centre(s) colocalizing out of 66
**************************************************
Image A: C1-PC 12.lsm
Image B: C2-PC 12.lsm
Overlap Coefficient:
r=0.681
r^2=k1xk2:
k1=3.5
k2=0.132
Using thresholds (thrA=370 and thrB=1755)
Overlap Coefficient:
r=0.944
r^2=k1xk2:
k1=5.215
k2=0.171
Manders' Coefficients (original):
M1=0.999 (fraction of A overlapping B)
M2=0.999 (fraction of B overlapping A)
Manders' Coefficients (using threshold value of 370 for imgA and 1755 for imgB):
M1=0.298 (fraction of A overlapping B)
M2=0.254 (fraction of B overlapping A)
Cytofluorogram's parameters:
a: 3.901
b: -31.283
Correlation coefficient: 0.658
Colocalization based on distance between centres of mass
Threshold for Image A=370; Image B=1755
Particles size between 20 & 6656400
Image A: 2 centre(s) colocalizing out of 29
Image B: 2 centre(s) colocalizing out of 47
Colocalization based on centres of mass-particles coincidence
Threshold for Image A=370; Image B=1755
Particles size between 20 & 6656400
Image A: 14 centre(s) colocalizing out of 29
Image B: 10 centre(s) colocalizing out of 47

## Sheet: JaCop NI  
**************************************************
Image A: C1-NI 1.lsm
Image B: C2-NI 1.lsm
Overlap Coefficient:
r=0.558
r^2=k1xk2:
k1=2.301
k2=0.135
Using thresholds (thrA=772 and thrB=1792)
Overlap Coefficient:
r=0.92
r^2=k1xk2:
k1=1.333
k2=0.636
Manders' Coefficients (original):
M1=0.999 (fraction of A overlapping B)
M2=0.999 (fraction of B overlapping A)
Manders' Coefficients (using threshold value of 772 for imgA and 1792 for imgB):
M1=0.063 (fraction of A overlapping B)
M2=0.005 (fraction of B overlapping A)
Cytofluorogram's parameters:
a: 2.389
b: -6.653
Correlation coefficient: 0.498
Colocalization based on distance between centres of mass
Threshold for Image A=772; Image B=1792
Particles size between 20 & 6656400
Image A: 0 centre(s) colocalizing out of 7
Image B: 0 centre(s) colocalizing out of 48
Colocalization based on centres of mass-particles coincidence
Threshold for Image A=772; Image B=1792
Particles size between 20 & 6656400
Image A: 0 centre(s) colocalizing out of 7
Image B: 0 centre(s) colocalizing out of 48
**************************************************
Image A: C1-NI 2.lsm
Image B: C2-NI 2.lsm
Overlap Coefficient:
r=0.601
r^2=k1xk2:
k1=2.488
k2=0.145
Using thresholds (thrA=402 and thrB=1755)
Overlap Coefficient:
r=0.969
r^2=k1xk2:
k1=4.171
k2=0.225
Manders' Coefficients (original):
M1=0.999 (fraction of A overlapping B)
M2=0.999 (fraction of B overlapping A)
Manders' Coefficients (using threshold value of 402 for imgA and 1755 for imgB):
M1=0.168 (fraction of A overlapping B)
M2=0.123 (fraction of B overlapping A)
Cytofluorogram's parameters:
a: 2.78
b: -18.589
Correlation coefficient: 0.55
Colocalization based on distance between centres of mass
Threshold for Image A=402; Image B=1755
Particles size between 20 & 6656400
Image A: 1 centre(s) colocalizing out of 32
Image B: 1 centre(s) colocalizing out of 44
Colocalization based on centres of mass-particles coincidence
Threshold for Image A=402; Image B=1755
Particles size between 20 & 6656400
Image A: 5 centre(s) colocalizing out of 32
Image B: 5 centre(s) colocalizing out of 44
**************************************************
Image A: C1-NI 3.lsm
Image B: C2-NI 3.lsm
Overlap Coefficient:
r=0.609
r^2=k1xk2:
k1=2.442
k2=0.151
Using thresholds (thrA=325 and thrB=1755)
Overlap Coefficient:
r=0.926
r^2=k1xk2:
k1=5.16
k2=0.166
Manders' Coefficients (original):
M1=0.999 (fraction of A overlapping B)
M2=0.999 (fraction of B overlapping A)
Manders' Coefficients (using threshold value of 325 for imgA and 1755 for imgB):
M1=0.05 (fraction of A overlapping B)
M2=0.1 (fraction of B overlapping A)
Cytofluorogram's parameters:
a: 2.521
b: -8.803
Correlation coefficient: 0.562
Colocalization based on distance between centres of mass
Threshold for Image A=325; Image B=1755
Particles size between 20 & 6656400
Image A: 1 centre(s) colocalizing out of 81
Image B: 1 centre(s) colocalizing out of 41
Colocalization based on centres of mass-particles coincidence
Threshold for Image A=325; Image B=1755
Particles size between 20 & 6656400
Image A: 12 centre(s) colocalizing out of 81
Image B: 10 centre(s) colocalizing out of 41
**************************************************
Image A: C1-NI 4.lsm
Image B: C2-NI 4.lsm
Overlap Coefficient:
r=0.696
r^2=k1xk2:
k1=3.597
k2=0.134
Using thresholds (thrA=353 and thrB=2230)
Overlap Coefficient:
r=0.97
r^2=k1xk2:
k1=6.44
k2=0.146
Manders' Coefficients (original):
M1=0.999 (fraction of A overlapping B)
M2=0.999 (fraction of B overlapping A)
Manders' Coefficients (using threshold value of 353 for imgA and 2230 for imgB):
M1=0.481 (fraction of A overlapping B)
M2=0.45 (fraction of B overlapping A)
Cytofluorogram's parameters:
a: 5.095
b: -72.36
Correlation coefficient: 0.727
Colocalization based on distance between centres of mass
Threshold for Image A=353; Image B=2230
Particles size between 20 & 6656400
Image A: 3 centre(s) colocalizing out of 16
Image B: 3 centre(s) colocalizing out of 23
Colocalization based on centres of mass-particles coincidence
Threshold for Image A=353; Image B=2230
Particles size between 20 & 6656400
Image A: 7 centre(s) colocalizing out of 16
Image B: 7 centre(s) colocalizing out of 23
**************************************************
Image A: C1-NI 5.lsm
Image B: C2-NI 5.lsm
Overlap Coefficient:
r=0.659
r^2=k1xk2:
k1=1.305
k2=0.333
Using thresholds (thrA=366 and thrB=1718)
Overlap Coefficient:
r=0.963
r^2=k1xk2:
k1=3.321
k2=0.279
Manders' Coefficients (original):
M1=0.999 (fraction of A overlapping B)
M2=0.999 (fraction of B overlapping A)
Manders' Coefficients (using threshold value of 366 for imgA and 1718 for imgB):
M1=0.018 (fraction of A overlapping B)
M2=0.518 (fraction of B overlapping A)
Cytofluorogram's parameters:
a: 1.259
b: 4.632
Correlation coefficient: 0.593
Colocalization based on distance between centres of mass
Threshold for Image A=366; Image B=1718
Particles size between 20 & 6656400
Image A: 0 centre(s) colocalizing out of 13
Image B: 0 centre(s) colocalizing out of 4
Colocalization based on centres of mass-particles coincidence
Threshold for Image A=366; Image B=1718
Particles size between 20 & 6656400
Image A: 1 centre(s) colocalizing out of 13
Image B: 1 centre(s) colocalizing out of 4
**************************************************
Image A: C1-NI 6.lsm
Image B: C2-NI 6.lsm
Overlap Coefficient:
r=0.574
r^2=k1xk2:
k1=1.887
k2=0.174
Using thresholds (thrA=368 and thrB=1733)
Overlap Coefficient:
r=0.0
r^2=k1xk2:
k1=0.0
k2=0.0
Manders' Coefficients (original):
M1=0.999 (fraction of A overlapping B)
M2=0.999 (fraction of B overlapping A)
Manders' Coefficients (using threshold value of 368 for imgA and 1733 for imgB):
M1=0.0 (fraction of A overlapping B)
M2=0.0 (fraction of B overlapping A)
Cytofluorogram's parameters:
a: 2.303
b: -14.735
Correlation coefficient: 0.468
Colocalization based on distance between centres of mass
Threshold for Image A=368; Image B=1733
Particles size between 20 & 6656400
Image A: 0 centre(s) colocalizing out of 13
Image B: 0 centre(s) colocalizing out of 0
Colocalization based on centres of mass-particles coincidence
Threshold for Image A=368; Image B=1733
Particles size between 20 & 6656400
Image A: 0 centre(s) colocalizing out of 13
Image B: 0 centre(s) colocalizing out of 0
**************************************************
Image A: C1-NI 7m.lsm
Image B: C2-NI 7m.lsm
Overlap Coefficient:
r=0.722
r^2=k1xk2:
k1=2.405
k2=0.216
Using thresholds (thrA=425 and thrB=1755)
Overlap Coefficient:
r=0.952
r^2=k1xk2:
k1=4.786
k2=0.189
Manders' Coefficients (original):
M1=0.999 (fraction of A overlapping B)
M2=0.999 (fraction of B overlapping A)
Manders' Coefficients (using threshold value of 425 for imgA and 1755 for imgB):
M1=0.059 (fraction of A overlapping B)
M2=0.162 (fraction of B overlapping A)
Cytofluorogram's parameters:
a: 2.636
b: -17.95
Correlation coefficient: 0.684
Colocalization based on distance between centres of mass
Threshold for Image A=425; Image B=1755
Particles size between 20 & 6656400
Image A: 2 centre(s) colocalizing out of 60
Image B: 2 centre(s) colocalizing out of 34
Colocalization based on centres of mass-particles coincidence
Threshold for Image A=425; Image B=1755
Particles size between 20 & 6656400
Image A: 5 centre(s) colocalizing out of 60
Image B: 5 centre(s) colocalizing out of 34
**************************************************
Image A: C1-NI 8.lsm
Image B: C2-NI 8.lsm
Overlap Coefficient:
r=0.714
r^2=k1xk2:
k1=1.645
k2=0.31
Using thresholds (thrA=914 and thrB=1755)
Overlap Coefficient:
r=0.959
r^2=k1xk2:
k1=2.576
k2=0.357
Manders' Coefficients (original):
M1=0.999 (fraction of A overlapping B)
M2=0.999 (fraction of B overlapping A)
Manders' Coefficients (using threshold value of 914 for imgA and 1755 for imgB):
M1=0.358 (fraction of A overlapping B)
M2=0.343 (fraction of B overlapping A)
Cytofluorogram's parameters:
a: 1.61
b: 5.208
Correlation coefficient: 0.672
Colocalization based on distance between centres of mass
Threshold for Image A=914; Image B=1755
Particles size between 20 & 6656400
Image A: 4 centre(s) colocalizing out of 15
Image B: 4 centre(s) colocalizing out of 20
Colocalization based on centres of mass-particles coincidence
Threshold for Image A=914; Image B=1755
Particles size between 20 & 6656400
Image A: 7 centre(s) colocalizing out of 15
Image B: 7 centre(s) colocalizing out of 20

## Sheet: JacoP PN
**************************************************
Image A: C1-PN.lsm
Image B: C2-PN.lsm
Overlap Coefficient:
r=0.698
r^2=k1xk2:
k1=1.94
k2=0.251
Using thresholds (thrA=397 and thrB=1755)
Overlap Coefficient:
r=0.945
r^2=k1xk2:
k1=2.603
k2=0.343
Manders' Coefficients (original):
M1=0.999 (fraction of A overlapping B)
M2=0.999 (fraction of B overlapping A)
Manders' Coefficients (using threshold value of 397 for imgA and 1755 for imgB):
M1=0.112 (fraction of A overlapping B)
M2=0.205 (fraction of B overlapping A)
Cytofluorogram's parameters:
a: 2.0
b: -6.783
Correlation coefficient: 0.663
Colocalization based on distance between centres of mass
Threshold for Image A=397; Image B=1755
Particles size between 20 & 6656400
Image A: 6 centre(s) colocalizing out of 12
Image B: 6 centre(s) colocalizing out of 20
Colocalization based on centres of mass-particles coincidence
Threshold for Image A=397; Image B=1755
Particles size between 20 & 6656400
Image A: 6 centre(s) colocalizing out of 12
Image B: 6 centre(s) colocalizing out of 20
**************************************************
Image A: C1-PN 2.lsm
Image B: C2-PN 2.lsm
Overlap Coefficient:
r=0.685
r^2=k1xk2:
k1=1.854
k2=0.253
Using thresholds (thrA=851 and thrB=1792)
Overlap Coefficient:
r=0.961
r^2=k1xk2:
k1=2.49
k2=0.37
Manders' Coefficients (original):
M1=0.999 (fraction of A overlapping B)
M2=0.999 (fraction of B overlapping A)
Manders' Coefficients (using threshold value of 851 for imgA and 1792 for imgB):
M1=0.335 (fraction of A overlapping B)
M2=0.154 (fraction of B overlapping A)
Cytofluorogram's parameters:
a: 1.87
b: -1.918
Correlation coefficient: 0.642
Colocalization based on distance between centres of mass
Threshold for Image A=851; Image B=1792
Particles size between 20 & 6656400
Image A: 7 centre(s) colocalizing out of 21
Image B: 7 centre(s) colocalizing out of 36
Colocalization based on centres of mass-particles coincidence
Threshold for Image A=851; Image B=1792
Particles size between 20 & 6656400
Image A: 10 centre(s) colocalizing out of 21
Image B: 10 centre(s) colocalizing out of 36
**************************************************
Image A: C1-PN 3.lsm
Image B: C2-PN 3.lsm
Overlap Coefficient:
r=0.735
r^2=k1xk2:
k1=1.785
k2=0.303
Using thresholds (thrA=733 and thrB=1755)
Overlap Coefficient:
r=0.933
r^2=k1xk2:
k1=2.469
k2=0.352
Manders' Coefficients (original):
M1=0.999 (fraction of A overlapping B)
M2=0.999 (fraction of B overlapping A)
Manders' Coefficients (using threshold value of 733 for imgA and 1755 for imgB):
M1=0.315 (fraction of A overlapping B)
M2=0.384 (fraction of B overlapping A)
Cytofluorogram's parameters:
a: 1.789
b: -0.91
Correlation coefficient: 0.71
Colocalization based on distance between centres of mass
Threshold for Image A=733; Image B=1755
Particles size between 20 & 6656400
Image A: 3 centre(s) colocalizing out of 36
Image B: 3 centre(s) colocalizing out of 46
Colocalization based on centres of mass-particles coincidence
Threshold for Image A=733; Image B=1755
Particles size between 20 & 6656400
Image A: 12 centre(s) colocalizing out of 36
Image B: 9 centre(s) colocalizing out of 46
**************************************************
Image A: C1-PN 5.lsm
Image B: C2-PN 5.lsm
Overlap Coefficient:
r=0.737
r^2=k1xk2:
k1=2.859
k2=0.19
Using thresholds (thrA=1170 and thrB=2559)
Overlap Coefficient:
r=0.929
r^2=k1xk2:
k1=1.94
k2=0.445
Manders' Coefficients (original):
M1=0.999 (fraction of A overlapping B)
M2=0.999 (fraction of B overlapping A)
Manders' Coefficients (using threshold value of 1170 for imgA and 2559 for imgB):
M1=0.772 (fraction of A overlapping B)
M2=0.103 (fraction of B overlapping A)
Cytofluorogram's parameters:
a: 2.958
b: -15.923
Correlation coefficient: 0.717
Colocalization based on distance between centres of mass
Threshold for Image A=1170; Image B=2559
Particles size between 20 & 6656400
Image A: 4 centre(s) colocalizing out of 16
Image B: 4 centre(s) colocalizing out of 49
Colocalization based on centres of mass-particles coincidence
Threshold for Image A=1170; Image B=2559
Particles size between 20 & 6656400
Image A: 11 centre(s) colocalizing out of 16
Image B: 9 centre(s) colocalizing out of 49
**************************************************
Image A: C1-PN 6.lsm
Image B: C2-PN 6.lsm
Overlap Coefficient:
r=0.751
r^2=k1xk2:
k1=2.314
k2=0.244
Using thresholds (thrA=918 and thrB=2413)
Overlap Coefficient:
r=0.97
r^2=k1xk2:
k1=2.78
k2=0.338
Manders' Coefficients (original):
M1=0.999 (fraction of A overlapping B)
M2=0.999 (fraction of B overlapping A)
Manders' Coefficients (using threshold value of 918 for imgA and 2413 for imgB):
M1=0.237 (fraction of A overlapping B)
M2=0.206 (fraction of B overlapping A)
Cytofluorogram's parameters:
a: 2.298
b: 3.992
Correlation coefficient: 0.723
Colocalization based on distance between centres of mass
Threshold for Image A=918; Image B=2413
Particles size between 20 & 6656400
Image A: 4 centre(s) colocalizing out of 74
Image B: 4 centre(s) colocalizing out of 58
Colocalization based on centres of mass-particles coincidence
Threshold for Image A=918; Image B=2413
Particles size between 20 & 6656400
Image A: 17 centre(s) colocalizing out of 74
Image B: 16 centre(s) colocalizing out of 58
**************************************************
Image A: C1-PN 7.lsm
Image B: C2-PN 7.lsm
Overlap Coefficient:
r=0.746
r^2=k1xk2:
k1=2.685
k2=0.207
Using thresholds (thrA=562 and thrB=1938)
Overlap Coefficient:
r=0.927
r^2=k1xk2:
k1=2.921
k2=0.294
Manders' Coefficients (original):
M1=0.999 (fraction of A overlapping B)
M2=0.999 (fraction of B overlapping A)
Manders' Coefficients (using threshold value of 562 for imgA and 1938 for imgB):
M1=0.304 (fraction of A overlapping B)
M2=0.319 (fraction of B overlapping A)
Cytofluorogram's parameters:
a: 2.746
b: -10.38
Correlation coefficient: 0.721
Colocalization based on distance between centres of mass
Threshold for Image A=562; Image B=1938
Particles size between 20 & 6656400
Image A: 12 centre(s) colocalizing out of 61
Image B: 12 centre(s) colocalizing out of 67
Colocalization based on centres of mass-particles coincidence
Threshold for Image A=562; Image B=1938
Particles size between 20 & 6656400
Image A: 25 centre(s) colocalizing out of 61
Image B: 25 centre(s) colocalizing out of 67
**************************************************
Image A: C1-PN 8.lsm
Image B: C2-PN 8.lsm
Overlap Coefficient:
r=0.831
r^2=k1xk2:
k1=2.428
k2=0.284
Using thresholds (thrA=749 and thrB=2157)
Overlap Coefficient:
r=0.97
r^2=k1xk2:
k1=2.915
k2=0.322
Manders' Coefficients (original):
M1=0.999 (fraction of A overlapping B)
M2=0.999 (fraction of B overlapping A)
Manders' Coefficients (using threshold value of 749 for imgA and 2157 for imgB):
M1=0.313 (fraction of A overlapping B)
M2=0.424 (fraction of B overlapping A)
Cytofluorogram's parameters:
a: 2.479
b: -13.149
Correlation coefficient: 0.818
Colocalization based on distance between centres of mass
Threshold for Image A=749; Image B=2157
Particles size between 20 & 6656400
Image A: 11 centre(s) colocalizing out of 46
Image B: 11 centre(s) colocalizing out of 87
Colocalization based on centres of mass-particles coincidence
Threshold for Image A=749; Image B=2157
Particles size between 20 & 6656400
Image A: 23 centre(s) colocalizing out of 46
Image B: 21 centre(s) colocalizing out of 87

## Sheet: JaCop O
**************************************************
Image A: C1-O 2.lsm
Image B: C2-O 2.lsm
Overlap Coefficient:
r=0.608
r^2=k1xk2:
k1=2.049
k2=0.18
Using thresholds (thrA=768 and thrB=3071)
Overlap Coefficient:
r=0.996
r^2=k1xk2:
k1=4.74
k2=0.209
Manders' Coefficients (original):
M1=0.999 (fraction of A overlapping B)
M2=0.999 (fraction of B overlapping A)
Manders' Coefficients (using threshold value of 768 for imgA and 3071 for imgB):
M1=0.01 (fraction of A overlapping B)
M2=0.034 (fraction of B overlapping A)
Cytofluorogram's parameters:
a: 2.029
b: 2.213
Correlation coefficient: 0.552
Colocalization based on distance between centres of mass
Threshold for Image A=768; Image B=3071
Particles size between 20 & 6656400
Image A: 0 centre(s) colocalizing out of 8
Image B: 0 centre(s) colocalizing out of 7
Colocalization based on centres of mass-particles coincidence
Threshold for Image A=768; Image B=3071
Particles size between 20 & 6656400
Image A: 0 centre(s) colocalizing out of 8
Image B: 0 centre(s) colocalizing out of 7
**************************************************
Image A: C1-O 3.lsm
Image B: C2-O 3.lsm
Overlap Coefficient:
r=0.683
r^2=k1xk2:
k1=2.911
k2=0.16
Using thresholds (thrA=329 and thrB=1755)
Overlap Coefficient:
r=0.849
r^2=k1xk2:
k1=3.44
k2=0.209
Manders' Coefficients (original):
M1=0.999 (fraction of A overlapping B)
M2=0.999 (fraction of B overlapping A)
Manders' Coefficients (using threshold value of 329 for imgA and 1755 for imgB):
M1=0.316 (fraction of A overlapping B)
M2=0.324 (fraction of B overlapping A)
Cytofluorogram's parameters:
a: 3.149
b: -16.831
Correlation coefficient: 0.637
Colocalization based on distance between centres of mass
Threshold for Image A=329; Image B=1755
Particles size between 20 & 6656400
Image A: 2 centre(s) colocalizing out of 71
Image B: 2 centre(s) colocalizing out of 56
Colocalization based on centres of mass-particles coincidence
Threshold for Image A=329; Image B=1755
Particles size between 20 & 6656400
Image A: 13 centre(s) colocalizing out of 71
Image B: 12 centre(s) colocalizing out of 56
**************************************************
Image A: C1-O 4.lsm
Image B: C2-O 4.lsm
Overlap Coefficient:
r=0.661
r^2=k1xk2:
k1=1.56
k2=0.28
Using thresholds (thrA=402 and thrB=1718)
Overlap Coefficient:
r=0.976
r^2=k1xk2:
k1=3.895
k2=0.244
Manders' Coefficients (original):
M1=0.999 (fraction of A overlapping B)
M2=0.999 (fraction of B overlapping A)
Manders' Coefficients (using threshold value of 402 for imgA and 1718 for imgB):
M1=0.036 (fraction of A overlapping B)
M2=0.36 (fraction of B overlapping A)
Cytofluorogram's parameters:
a: 1.365
b: 20.344
Correlation coefficient: 0.56
Colocalization based on distance between centres of mass
Threshold for Image A=402; Image B=1718
Particles size between 20 & 6656400
Image A: 0 centre(s) colocalizing out of 52
Image B: 0 centre(s) colocalizing out of 22
Colocalization based on centres of mass-particles coincidence
Threshold for Image A=402; Image B=1718
Particles size between 20 & 6656400
Image A: 0 centre(s) colocalizing out of 52
Image B: 0 centre(s) colocalizing out of 22
**************************************************
Image A: C1-O 5.lsm
Image B: C2-O 5.lsm
Overlap Coefficient:
r=0.466
r^2=k1xk2:
k1=1.284
k2=0.169
Using thresholds (thrA=658 and thrB=1901)
Overlap Coefficient:
r=0.0
r^2=k1xk2:
k1=0.0
k2=0.0
Manders' Coefficients (original):
M1=0.999 (fraction of A overlapping B)
M2=0.999 (fraction of B overlapping A)
Manders' Coefficients (using threshold value of 658 for imgA and 1901 for imgB):
M1=0.0 (fraction of A overlapping B)
M2=0.0 (fraction of B overlapping A)
Cytofluorogram's parameters:
a: 0.837
b: 33.0
Correlation coefficient: 0.284
Colocalization based on distance between centres of mass
Threshold for Image A=658; Image B=1901
Particles size between 20 & 6656400
Image A: 0 centre(s) colocalizing out of 5
Image B: 0 centre(s) colocalizing out of 7
Colocalization based on centres of mass-particles coincidence
Threshold for Image A=658; Image B=1901
Particles size between 20 & 6656400
Image A: 0 centre(s) colocalizing out of 5
Image B: 0 centre(s) colocalizing out of 7
**************************************************
Image A: C1-O 6.lsm
Image B: C2-O 6.lsm
Overlap Coefficient:
r=0.52
r^2=k1xk2:
k1=2.94
k2=0.092
Using thresholds (thrA=402 and thrB=1792)
Overlap Coefficient:
r=0.924
r^2=k1xk2:
k1=4.833
k2=0.176
Manders' Coefficients (original):
M1=0.999 (fraction of A overlapping B)
M2=0.999 (fraction of B overlapping A)
Manders' Coefficients (using threshold value of 402 for imgA and 1792 for imgB):
M1=0.227 (fraction of A overlapping B)
M2=0.055 (fraction of B overlapping A)
Cytofluorogram's parameters:
a: 2.934
b: 0.58
Correlation coefficient: 0.472
Colocalization based on distance between centres of mass
Threshold for Image A=402; Image B=1792
Particles size between 20 & 6656400
Image A: 4 centre(s) colocalizing out of 44
Image B: 4 centre(s) colocalizing out of 30
Colocalization based on centres of mass-particles coincidence
Threshold for Image A=402; Image B=1792
Particles size between 20 & 6656400
Image A: 14 centre(s) colocalizing out of 44
Image B: 9 centre(s) colocalizing out of 30
**************************************************
Image A: C1-O 7.lsm
Image B: C2-O 7.lsm
Overlap Coefficient:
r=0.826
r^2=k1xk2:
k1=2.665
k2=0.256
Using thresholds (thrA=679 and thrB=1755)
Overlap Coefficient:
r=0.968
r^2=k1xk2:
k1=3.027
k2=0.309
Manders' Coefficients (original):
M1=0.999 (fraction of A overlapping B)
M2=0.999 (fraction of B overlapping A)
Manders' Coefficients (using threshold value of 679 for imgA and 1755 for imgB):
M1=0.361 (fraction of A overlapping B)
M2=0.131 (fraction of B overlapping A)
Cytofluorogram's parameters:
a: 2.896
b: -25.125
Correlation coefficient: 0.821
Colocalization based on distance between centres of mass
Threshold for Image A=679; Image B=1755
Particles size between 20 & 6656400
Image A: 1 centre(s) colocalizing out of 37
Image B: 1 centre(s) colocalizing out of 72
Colocalization based on centres of mass-particles coincidence
Threshold for Image A=679; Image B=1755
Particles size between 20 & 6656400
Image A: 16 centre(s) colocalizing out of 37
Image B: 11 centre(s) colocalizing out of 72
**************************************************
Image A: C1-O 8.lsm
Image B: C2-O 8.lsm
Overlap Coefficient:
r=0.449
r^2=k1xk2:
k1=2.103
k2=0.096
Using thresholds (thrA=548 and thrB=2559)
Overlap Coefficient:
r=0.984
r^2=k1xk2:
k1=4.196
k2=0.231
Manders' Coefficients (original):
M1=0.999 (fraction of A overlapping B)
M2=0.999 (fraction of B overlapping A)
Manders' Coefficients (using threshold value of 548 for imgA and 2559 for imgB):
M1=0.051 (fraction of A overlapping B)
M2=0.025 (fraction of B overlapping A)
Cytofluorogram's parameters:
a: 2.04
b: 8.139
Correlation coefficient: 0.402
Colocalization based on distance between centres of mass
Threshold for Image A=548; Image B=2559
Particles size between 20 & 6656400
Image A: 0 centre(s) colocalizing out of 17
Image B: 0 centre(s) colocalizing out of 29
Colocalization based on centres of mass-particles coincidence
Threshold for Image A=548; Image B=2559
Particles size between 20 & 6656400
Image A: 0 centre(s) colocalizing out of 17
Image B: 0 centre(s) colocalizing out of 29
**************************************************
Image A: C1-O 9.lsm
Image B: C2-O 9.lsm
Overlap Coefficient:
r=0.625
r^2=k1xk2:
k1=2.419
k2=0.161
Using thresholds (thrA=512 and thrB=1718)
Overlap Coefficient:
r=0.957
r^2=k1xk2:
k1=2.592
k2=0.353
Manders' Coefficients (original):
M1=0.999 (fraction of A overlapping B)
M2=0.999 (fraction of B overlapping A)
Manders' Coefficients (using threshold value of 512 for imgA and 1718 for imgB):
M1=0.603 (fraction of A overlapping B)
M2=0.285 (fraction of B overlapping A)
Cytofluorogram's parameters:
a: 2.45
b: -4.96
Correlation coefficient: 0.597
Colocalization based on distance between centres of mass
Threshold for Image A=512; Image B=1718
Particles size between 20 & 6656400
Image A: 1 centre(s) colocalizing out of 12
Image B: 1 centre(s) colocalizing out of 37
Colocalization based on centres of mass-particles coincidence
Threshold for Image A=512; Image B=1718
Particles size between 20 & 6656400
Image A: 7 centre(s) colocalizing out of 12
Image B: 7 centre(s) colocalizing out of 37
**************************************************
Image A: C1-O 10.lsm
Image B: C2-O 10.lsm
Overlap Coefficient:
r=0.716
r^2=k1xk2:
k1=3.716
k2=0.138
Using thresholds (thrA=631 and thrB=1938)
Overlap Coefficient:
r=0.963
r^2=k1xk2:
k1=3.439
k2=0.269
Manders' Coefficients (original):
M1=0.999 (fraction of A overlapping B)
M2=0.999 (fraction of B overlapping A)
Manders' Coefficients (using threshold value of 631 for imgA and 1938 for imgB):
M1=0.655 (fraction of A overlapping B)
M2=0.136 (fraction of B overlapping A)
Cytofluorogram's parameters:
a: 4.014
b: -34.497
Correlation coefficient: 0.703
Colocalization based on distance between centres of mass
Threshold for Image A=631; Image B=1938
Particles size between 20 & 6656400
Image A: 1 centre(s) colocalizing out of 25
Image B: 1 centre(s) colocalizing out of 44
Colocalization based on centres of mass-particles coincidence
Threshold for Image A=631; Image B=1938
Particles size between 20 & 6656400
Image A: 18 centre(s) colocalizing out of 25
Image B: 10 centre(s) colocalizing out of 44
**************************************************
Image A: C1-O 11.lsm
Image B: C2-O 11.lsm
Overlap Coefficient:
r=0.73
r^2=k1xk2:
k1=3.06
k2=0.174
Using thresholds (thrA=868 and thrB=2559)
Overlap Coefficient:
r=0.966
r^2=k1xk2:
k1=2.842
k2=0.328
Manders' Coefficients (original):
M1=0.999 (fraction of A overlapping B)
M2=0.999 (fraction of B overlapping A)
Manders' Coefficients (using threshold value of 868 for imgA and 2559 for imgB):
M1=0.346 (fraction of A overlapping B)
M2=0.151 (fraction of B overlapping A)
Cytofluorogram's parameters:
a: 3.163
b: -18.043
Correlation coefficient: 0.713
Colocalization based on distance between centres of mass
Threshold for Image A=868; Image B=2559
Particles size between 20 & 6656400
Image A: 3 centre(s) colocalizing out of 20
Image B: 3 centre(s) colocalizing out of 34
Colocalization based on centres of mass-particles coincidence
Threshold for Image A=868; Image B=2559
Particles size between 20 & 6656400
Image A: 18 centre(s) colocalizing out of 20
Image B: 13 centre(s) colocalizing out of 34
**************************************************
Image A: C1-O 12.lsm
Image B: C2-O 12.lsm
Overlap Coefficient:
r=0.636
r^2=k1xk2:
k1=2.523
k2=0.16
Using thresholds (thrA=548 and thrB=1755)
Overlap Coefficient:
r=0.953
r^2=k1xk2:
k1=3.275
k2=0.277
Manders' Coefficients (original):
M1=0.999 (fraction of A overlapping B)
M2=0.999 (fraction of B overlapping A)
Manders' Coefficients (using threshold value of 548 for imgA and 1755 for imgB):
M1=0.258 (fraction of A overlapping B)
M2=0.099 (fraction of B overlapping A)
Cytofluorogram's parameters:
a: 2.677
b: -15.913
Correlation coefficient: 0.609
Colocalization based on distance between centres of mass
Threshold for Image A=548; Image B=1755
Particles size between 20 & 6656400
Image A: 7 centre(s) colocalizing out of 59
Image B: 7 centre(s) colocalizing out of 50
Colocalization based on centres of mass-particles coincidence
Threshold for Image A=548; Image B=1755
Particles size between 20 & 6656400
Image A: 19 centre(s) colocalizing out of 59
Image B: 17 centre(s) colocalizing out of 50
**************************************************
Image A: C1-O 13.lsm
Image B: C2-O 13.lsm
Overlap Coefficient:
r=0.755
r^2=k1xk2:
k1=4.354
k2=0.131
Using thresholds (thrA=439 and thrB=1718)
Overlap Coefficient:
r=0.953
r^2=k1xk2:
k1=4.997
k2=0.181
Manders' Coefficients (original):
M1=0.999 (fraction of A overlapping B)
M2=0.999 (fraction of B overlapping A)
Manders' Coefficients (using threshold value of 439 for imgA and 1718 for imgB):
M1=0.772 (fraction of A overlapping B)
M2=0.292 (fraction of B overlapping A)
Cytofluorogram's parameters:
a: 4.822
b: -52.092
Correlation coefficient: 0.753
Colocalization based on distance between centres of mass
Threshold for Image A=439; Image B=1718
Particles size between 20 & 6656400
Image A: 13 centre(s) colocalizing out of 78
Image B: 13 centre(s) colocalizing out of 63
Colocalization based on centres of mass-particles coincidence
Threshold for Image A=439; Image B=1718
Particles size between 20 & 6656400
Image A: 55 centre(s) colocalizing out of 78
Image B: 31 centre(s) colocalizing out of 63

## Sheet: résumé Jacop
Ovelap coefficient	1	2	3	4	5	6	7	8	9	10	11	12	13
NI	0.92	0.969	0.92	0.97	0.96	0	0.952	0.959
PTV	0	0.93	0.96	0.93	0.963		0.957	0.93	0.967	0.963	0.952	0.944
PN	0.945	0.961	0.933		0.929	0.97	0.927	0.97
O		0.996	0.849	0.976	0	0.924	0.968	0.984	0.957	0.963	0.966	0.95	0.953
M1	1	2	3	4	5	6	7	8	9	10	11	12	13
NI	0.063	0.16	0.05	0.48	0.018	0	0.059	0.358
PTV	0	0.41	0.405	0.256	0.238		0.224	0.174	0.481	0.512	0.408	0.298
PN	0.112	0.335	0.315		0.772	0.237	0.304	0.313
O		0.01	0.316	0.036	0	0.227	0.361	0.051	0.603	0.655	0.346	0.258	0.772
M2	1	2	3	4	5	6	7	8	9	10	11	12	13
NI	0.005	0.12	0.1	0.45	0.51	0	0.162	0.343
PTV	0	0.448	0.696	0.504	0.522		0.146	0.316	0.199	0.302	0.353	0.254
PN	0.205	0.154	0.384		0.103	0.206	0.319	0.424
O		0.034	0.324	0.36	0	0.055	0.131	0.025	0.285	0.136	0.151	0.099	0.292
correlation coefficient	1	2	3	4	5	6	7	8	9	10	11	12	13
NI	0.49	0.55	0.56	0.72	0.593	0.468	0.68	0.67
PTV	0.38	0.65	0.8	0.643	0.634		0.546	0.477	0.719	0.727	0.762	0.658
PN	0.663	0.642	0.71		0.717	0.723	0.721	0.818
O	0.552	0.637	0.56	0.28	0.472	0.821	0.402	0.597	0.703	0.71	0.609	0.753

## Sheet: Colocalization based on distanc
Colocalization based on distance between centres of mass
NI	1	2	3	4	5	6	7	8	9	10	11	12	13
Nombre de foyer yH2AX colocalisé	0	1	1	3	0	0	2	4
Nombre de foyers yH2AX totaux	7	32	81	16	13	13	60	15
PERCENT	0	0.03125	0.0123457	0.1875	0	0	0.0333333	0.266667
Nombre de foyer 53BP1 colocalisé	0	1	1	3	0	0	2	4
Nombre de foyers 53BP1 totaux	48	44	41	23	4	0	34	20
PERCENT	0	0.0227273	0.0243902	0.130435	0	#DIV/0!	0.0588235	0.2
PTV	1	2	3	4	5	6	7	8	9	10	11	12	13
Nombre de foyer yH2AX colocalisé	0	21	9	11	18		4	0	5	17	7	2
Nombre de foyers yH2AX totaux	1	75	66	102	69		54	72	41	62	55	29
PERCENT	0	0.28	0.136364	0.107843	0.26087		0.0740741	0	0.121951	0.274194	0.127273	0.0689655
Nombre de foyer 53BP1 colocalisé	0	21	9	11	18		4	0	5	17	7	2
Nombre de foyers 53BP1 totaux	13	71	82	63	57		84	103	63	110	66	47
PERCENT	0	0.295775	0.109756	0.174603	0.315789		0.047619	0	0.0793651	0.154545	0.106061	0.0425532
PN	1	2	3	4	5	6	7	8	9	10	11	12	13
Nombre de foyer yH2AX colocalisé	6	7	3		4	4	12	11
Nombre de foyers yH2AX totaux	12	21	36		16	74	61	46
PERCENT	0.5	0.333333	0.0833333		0.25	0.0540541	0.196721	0.23913
Nombre de foyer 53BP1 colocalisé	6	7	3		4	4	12	11
Nombre de foyers 53BP1 totaux	20	21	46		49	58	67	87
PERCENT	0.3	0.333333	0.0652174		0.0816327	0.0689655	0.179104	0.126437
OMBRE	1	2	3	4	5	6	7	8	9	10	11	12	13
Nombre de foyer yH2AX colocalisé		0	2	0	0	4	1	0	1	1	3	7	13
Nombre de foyers yH2AX totaux		8	71	52	5	44	37	17	12	25	20	59	78
PERCENT		0	0.028169	0	0	0.0909091	0.027027	0	0.0833333	0.04	0.15	0.118644	0.166667
Nombre de foyer 53BP1 colocalisé		0	2	0	0	4	1	0	1	1	3	7	13
Nombre de foyers 53BP1 totaux		7	56	22	7	30	72	29	37	44	34	50	63
PERCENT		0	0.0357143	0	0	0.133333	0.0138889	0	0.027027	0.0227273	0.0882353	0.14	0.206349

## Sheet: Colocalization based on centres
Colocalization based on centres of mass-particles coincidence
NI	1	2	3	4	5	6	7	8	9	10	11	12	13	moyenne
Nombre de foyer yH2AX colocalisé	0	5	12	7	1	0	5	7									NI	PTV	PN	O
Nombre de foyers yH2AX totaux	7	32	81	16	13	13	60	15								yH2AX	0.171103	0.396455	0.448084	0.347017
PERCENT	0	0.15625	0.148148	0.4375	0.0769231	0	0.0833333	0.466667						0.171103		53BP1	0.176118	0.282194	0.263926	0.191495
Nombre de foyer 53BP1 colocalisé	0	5	10	7	1	0	5	7
Nombre de foyers 53BP1 totaux	48	44	41	23	4	0	34	20
PERCENT	0	0.113636	0.243902	0.304348	0.25	0	0.147059	0.35						0.176118
PTV	1	2	3	4	5	6	7	8	9	10	11	12	13
Nombre de foyer yH2AX colocalisé	0	28	27	36	27		18	10	27	43	29	14
Nombre de foyers yH2AX totaux	1	75	66	102	69		54	72	41	62	55	29
PERCENT	0	0.373333	0.409091	0.352941	0.391304		0.333333	0.138889	0.658537	0.693548	0.527273	0.482759		0.396455
Nombre de foyer 53BP1 colocalisé	0	28	26	29	26		12	10	20	36	25	10
Nombre de foyers 53BP1 totaux	13	71	82	63	57		84	103	63	110	66	47
PERCENT	0	0.394366	0.317073	0.460317	0.45614		0.142857	0.0970874	0.31746	0.327273	0.378788	0.212766		0.282194
PN	1	2	3	4	5	6	7	8	9	10	11	12	13
Nombre de foyer yH2AX colocalisé	6	10	12		11	17	25	23									ɣH2Ax (rouge)
Nombre de foyers yH2AX totaux	12	21	36		16	74	61	46									NI	PTV	PN	O
PERCENT	0.5	0.47619	0.333333		0.6875	0.22973	0.409836	0.5						0.448084		1	7	30	13	17
Nombre de foyer 53BP1 colocalisé	6	10	9		9	16	25	21								2	12	84	52	18
Nombre de foyers 53BP1 totaux	20	36	46		49	58	67	87								3	38	82	43	72
PERCENT	0.3	0.277778	0.195652		0.183673	0.275862	0.373134	0.241379						0.263926		4	12	27	27	49
																5	23	87	31	1
OMBRE	1	2	3	4	5	6	7	8	9	10	11	12	13			6	5	137	60	31
Nombre de foyer yH2AX colocalisé		0	13	0	0	14	16	0	7	18	18	19	55			7	34	119	49	56
Nombre de foyers yH2AX totaux		8	71	52	5	44	37	17	12	25	20	59	78			8	8	51	63	0
PERCENT		0	0.183099	0	0	0.318182	0.432432	0	0.583333	0.72	0.9	0.322034	0.705128	0.347017		9	11	37	0	9
Nombre de foyer 53BP1 colocalisé		0	12	0	0	9	11	0	7	10	13	17	31			10	0	104	0	45
Nombre de foyers 53BP1 totaux		7	56	22	7	30	72	29	37	44	34	50	63			11	0	87	0	28
PERCENT		0	0.214286	0	0	0.3	0.152778	0	0.189189	0.227273	0.382353	0.34	0.492063	0.191495		12	0	51	0	72
																13	0	0	0	67
																	53BP1 (vert)
																	NI	PTV	PN	O
																1	69	35	26	56
																2	98	78	29	30
																3	33	79	62	42
																4	12	53	53	75
																5	29	38	74	16
																6	81	137	67	39
																7	48	66	59	55
																8	20	105	84	42
																9	23	70	0	33
																10	0	86	0	57
																11	0	67	0	40
																12	0	53	0	39
																13	0	0	0	79

## Sheet: Colocalization based on cen (2)
Colocalization based on centres of mass-particles coincidence
NI	1	2	3	4	5	6	7	8	9	10	11	12	13	moyenne
Nombre de foyer yH2AX colocalisé	0	5	12	7	1	0	5	7										somme foyer Clem		1	2	3	4	5	6	7	8	9	10	11	12	13
Nombre de foyers yH2AX totaux	7	12	38	12	23	5	34	8	11									ɣH2Ax (rouge)	NI	7	12	38	12	23	5	34	8	11	0	0	0	0
PERCENT	0	0.416667	0.315789	0.583333	0.0434783	0	0.147059	0.875						0.297666					PTV	30	84	82	27	87	137	119	51	37	104	87	51	0
Nombre de foyer 53BP1 colocalisé	0	5	10	7	1	0	5	7											PN	13	52	43	27	31	60	49	63	0	0	0	0	0
Nombre de foyers 53BP1 totaux	69	98	33	12	29	81	48	20	23	0	0	0	0						O	17	18	72	49	1	31	56	0	9	45	28	72	67
PERCENT	0	0.0510204	0.30303	0.583333	0.0344828	0	0.104167	0.35						0.178254
																				1	2	3	4	5	6	7	8	9	10	11	12	13
PTV	1	2	3	4	5	6	7	8	9	10	11	12	13					53BP1 (vert)	NI	69	98	33	12	29	81	48	20	23	0	0	0	0
Nombre de foyer yH2AX colocalisé	0	28	27	36	27		18	10	27	43	29	14							PTV	35	78	79	53	38	137	66	105	70	86	67	53	0
Nombre de foyers yH2AX totaux	30	84	82	27	87	137	119	51	37	104	87	51							PN	26	29	62	53	74	67	59	84	0	0	0	0	0
PERCENT	0	0.333333	0.329268	1.33333	0.310345		0.151261	0.196078	0.72973	0.413462	0.333333	0.27451		0.400423					O	56	30	42	75	16	39	55	42	33	57	40	39	79
Nombre de foyer 53BP1 colocalisé	0	28	26	29	26		12	10	20	36	25	10
Nombre de foyers 53BP1 totaux	35	78	79	53	38	137	66	105	70	86	67	53	0						NI	PTV	PN	O
PERCENT	0	0.358974	0.329114	0.54717	0.684211		0.181818	0.0952381	0.285714	0.418605	0.373134	0.188679		0.314787				yH2AX	0.297666	0.400423	0.349482	0.318609
																		53BP1	0.178254	0.314787	0.250702	0.188112
PN	1	2	3	4	5	6	7	8	9	10	11	12	13
Nombre de foyer yH2AX colocalisé	6	10	12		11	17	25	23											NI	PTV	PN	O
Nombre de foyers yH2AX totaux	13	52	43	27	31	60	49	63										yH2AX	0.171103	0.396455	0.448084	0.347017
PERCENT	0.461538	0.192308	0.27907		0.354839	0.283333	0.510204	0.365079						0.349482				53BP1	0.176118	0.282194	0.263926	0.191495
Nombre de foyer 53BP1 colocalisé	6	10	9		9	16	25	21
Nombre de foyers 53BP1 totaux	26	29	62	53	74	67	59	84	0	0	0	0	0
PERCENT	0.230769	0.344828	0.145161		0.121622	0.238806	0.423729	0.25						0.250702
OMBRE	1	2	3	4	5	6	7	8	9	10	11	12	13
Nombre de foyer yH2AX colocalisé		0	13	0	0	14	16	0	7	18	18	19	55
Nombre de foyers yH2AX totaux	17	18	72	49	1	31	56	0	9	45	28	72	67
PERCENT		0	0.180556	0	0	0.451613	0.285714	0	0.777778	0.4	0.642857	0.263889	0.820896	0.318609
Nombre de foyer 53BP1 colocalisé		0	12	0	0	9	11	0	7	10	13	17	31
Nombre de foyers 53BP1 totaux	56	30	42	75	16	39	55	42	33	57	40	39	79
PERCENT		0	0.285714	0	0	0.230769	0.2	0	0.212121	0.175439	0.325	0.435897	0.392405	0.188112

[truncated: 2 more sheets: ANOVA, nombre de foyer colocalisé]
