# Supplementary material for: The out-of-field dose in radiation therapy induces delayed tumorigenesis by senescence evasion
Source: eLife. 2022 Mar 18;11:e67190. doi: 10.7554/eLife.67190 (PMC8933005; doi:10.7554/eLife.67190)
Supplement: Figure 3—figure supplement 3—source data 1. [file elife-67190-fig3-figsupp3-data1.xlsx]

## Sheet: Feuil1
Figure 3 – Figure supplement 3-source data 1
F26FC1 pH12.3	Non-irradiated	PTV	-5 to +20	+22 to +47
	0	88.7014	0	0
	0	91.6305	98.0529	0
	0	100.537	98.6631	71.4514
	54.5646	101.631	98.9657	73.4471
	68.0102	109.273	100.821	77.417
	68.9582	117.734	108.487	81.4971
	70.2463	121.658	112.037	81.6927
	72.301	124.32	112.186	82.3618
	75.685	127.711	115.548	84.5036
	76.361	129.414	117.886	88.3985
	76.5705	130.126	127.502	90.8125
	76.9022	130.779	127.638	93.229
	78.0582	131.198	132.12	94.706
	78.0889	133.948	133.554	97.5551
	79.1735	134.784	134.803	98.479
	80.3366	137.124	134.834	103.308
	81.4016	141.475	137.748	104.3
	82.4615	145.264	138.289	104.767
	82.5701	147.608	138.627	105.141
	83.3723	148.117	138.816	106.151
	84.2785	148.924	139.085	108.413
	84.674	149.293	139.392	109.699
	86.1258	150.386	139.408	112.193
	87.5144	152.588	140.092	116.908
	88.622	152.596	140.258	120.098
	91.1083	153.877	141.82	123.179
	93.7124	154.574	143.568	125.22
	94.378	157.748	143.672	127.112
	95.0585	158.533	143.792	128.719
	95.5322	159.295	144.529	131.302
	95.908	160.318	145.481	133.884
	99.1572	162.9	145.906	137.317
	101.621	163.143	146.654	138.496
	103.357	165.8	146.908	139.566
	103.629	166.498	147.369	140.298
	104.933	167.567	149.893	140.481
	105.681	168.304	150.455	142.48
	106.318	170.555	152.483	143.347
	107.395	170.754	153.874	144.643
	107.99	172.243	153.894	146.01
	108.959	172.804	153.903	146.171
	113.169	174.972	153.933	147.802
	113.826	175.058	156.837	149.813
	118.198	175.321	157.178	152.961
	118.653	177.899	157.231	154.043
	122.364	182.542	160.02	155.38
	122.909	185.288	162.097	155.986
	124.165	188.791	165.248	158.411
	124.487	188.895	168.886	161.813
	124.722	193.267	172.046	163.424
	127.987	195.757	172.229	164.627
	129.171	196.244	173.993	166.79
	133.402	197.732	174.906	169.109
	137.9	202.583	175.129	171.704
	142.132	205.497	177.232	175.056
	144.258	205.865	177.447	175.674
	145.199	207.826	181.521	179.892
	146.748	211.508	184.468	180.275
	147.85	213.199	186.084	181.276
	154.323	214.351	187.886	182.311
	156.945	216.119	188.393	184.357
	158.351	216.267	189.212	186.895
	159.722	217.879	190.579	188.963
	161.14	226.203	190.769	190.411
	163.26	227.713	191.364	192.191
	164.34	236.13	191.434	199.329
	165.251	251.567	194.368	201.077
	167.364	276.657	194.97	204.267
	167.552		195.824	216.171
	168.857		196.603	217.945
	171.071		200.119	221.783
	172.211		205.234	223.889
	174.25		211.453	225.981
	175.981		212.116	229.229
	176.778		213.268	254.405
	177.49		219.635	260.114
	179.489		220.371	263.319
	183.203		222.935	276.755
	184.521		223.989	280.465
	186.2		231.109	282.863
	187.93		232.357	291.851
	191.891		244.851	295.779
	194.304		263.079	311.512
	197.764		271.676	316.8
	202.066			339.908
	206.779			344.928
	211.344			370.727
