# Supplementary material for: The out-of-field dose in radiation therapy induces delayed tumorigenesis by senescence evasion
Source: eLife. 2022 Mar 18;11:e67190. doi: 10.7554/eLife.67190 (PMC8933005; doi:10.7554/eLife.67190)
Supplement: Figure 3—figure supplement 3—source data 3. [file elife-67190-fig3-figsupp3-data3.xlsx]

## Sheet: Feuil1
Figure 3 – Figure supplement 3-source data 3
F26FC1 PH8	Non-irradiated	PTV	-5 to +20	+22 to +47
	0	0	0	0
	0	0	0	0
	0	0	0	0
	0	0	0	0
	0	0	0	0
	0	0	0	0
	0	0	0	0
	0	0	0	0
	0	0	0	0
	0	0	0	0
	0	0	0	0
	0	0	0	0
	0	0	0	0
	0	0	0	0
	0	0	0	0
	0	0	0	0
	0	0	0	0
	0	0	0	0
	0	0	0	0
	0	0	0	0
	0	0	0	0
	0	0	0	0
	0	0	0	0
	0	0	0	0
	0	0	0	0
	0	0	0	0
	0	0	0	0
	0	0	0	0
	0	0	0	0
	0	0	0	0
	0	0	0	0
	0	0	0	0
	0	0	0	0
	0	0	0	0
	0	0	0	0
	0	0	0	0
	0	0	0	0
	0	0	0	0
	0	0	0	0
	0	0	0	0
	0	0	0	0
	0	0	0	0
	0	0	0	0
	0	0	0	0
	0	0	0	0
	0	0	0	0
	0	0	0	0
	0	0	0	0
	0	0	0	0
	0	0	0	0
	0	0	0	0
	0	0	0	0
	0	0	0	0
	0	0	0	0
	0	0	0	0
	0	0	0	0
	0	0	0	0
	0	0	0	0
	0	0	0	0
	0	0	0	0
	0	0	0	0
	0	0	0	0
	0	0	0	0
	0	0	0	0
	0	0	0	0
	0	0	0	0
	0	0	0	0
	0	0	0	0
	0	0	0	0
	0	0	0	0
	0	0	0	0
	0	0	0	0
	0	0	0	0
	0	0	0	0
	0	0	0	0
	0	0	0	0
	0	0	0	0
	0	0	0	0
	0	0	0	0
	0	0	0	0
	0	0	0	0
	0	0	0	0
	0	0	0	0
	0	0	0	0
	0	0	0	0
	0	0	0	0
	0	0	0	0
	0	0	0	0
	0	0	0	0
	0	0	0	0
	0	0	0	0
	0	0	0	0
	0	0	0	0
	0	0	0	0
	0	0	0	0
	0	0	0	0
	0	0	0	0
	0	35.2222	0	0
	0	35.7165	0	0
	0	37.6014	0	0
	0	39.4867	0	0
	0	40.5165	0	0
	0	41.7017	0	0
	0	44.921	0	0
	0	45.0341	0	0
	0	49.0546	0	0
	0	49.8501	0	0
	0	51.3743	0	0
	0	52.5604	0	0
	0	52.6279	0	0
	0	53.9795	0	0
	0	54.0562	0	0
	0	55.1509	0	0
	0	55.8821	0	0
	0	55.9724	0	0
	0	56.6287	0	0
	0	58.9928	0	0
	0	59.2348	0	0
	0	60.0924	0	0
	0	60.2667	0	0
	0	61.0574	0	0
	0	62.8939	0	0
	0	63.9176	0	0
	0	64.1047	0	0
	0	64.385	0	0
	0	67.2729	0	0
	0	71.0352	0	0
	0	75.8454	0	0
	0	77.9688	0	0
	0	77.9763	0	0
	0	78.9662	0	0
	0	83.9198	0	0
	0	83.9582	0	0
	0	85.4756	0	0
	0	86.5344	0	0
	0	88.8501	0	0
	0	91.0645	0	0
	0	92.8929	0	0
	0	92.9423	0	0
	0	99.2726	0	0
	0	113.684	0	0
	0	115.517	0	0
	0	116.244	0	0
	0	120.481	0	0
	0	126.353	0	0
	0	141.679	0	0
	0	170.596	0	0
	0	190.258	0	0
	0	254.33	0	0
	0	296.824	0	0
	0	321.671	0	0
	36.8088		0	0
	39.5868		0	0
	45.7437		0	0
	50.9629		0	0
	51.2465		0	0
	52.9125		0	0
	54.3078		0	0
	59.9815		0	0
	61.1361		0	0
	63.0218		0	0
	64.6254		0	0
	68.2721		0	0
	74.3964		0	0
	75.1003		0	0
	79.0236		0	0
	81.898		0	0
	83.1708		0	0
	83.9761		0	0
	84.2025		0	0
	86.6834		0	0
	87.6205		0	0
	98.7141		0	0
	100.391		0	0
	108.029		0	0
	112.967		0	0
	117.371		0	0
	118.702		0	0
	126.429		0	0
	136.663		0	0
	162.112		0	0
			27.5643	0
			32.3388	0
			35.4937	0
			35.6698	0
			35.8903	0
			38.6812	0
			40.818	0
			42.583	0
			43.2609	24.5489
			43.4101	43.0515
			46.074	44.049
			46.568	46.8252
			56.1639	48.6022
			57.5656	54.823
			57.9325	55.9906
			58.5758	56.6142
			61.4357	58.1003
			64.8628	62.6029
			64.8852	62.6379
			68.0233	63.2336
			68.614	71.7841
			69.4236	73.5599
			125.914	74.1971
			136.425	74.5097
				76.5113
				88.4116
				90.6931
				102.42
