# Supplementary material for: The out-of-field dose in radiation therapy induces delayed tumorigenesis by senescence evasion
Source: eLife. 2022 Mar 18;11:e67190. doi: 10.7554/eLife.67190 (PMC8933005; doi:10.7554/eLife.67190)
Supplement: Figure 3—figure supplement 3—source data 5. [file elife-67190-fig3-figsupp3-data5.xlsx]

## Sheet: Feuil1
Figure 3 – Figure supplement 3-source data 5
F1MC1 pH12.3	Non-irradiated	PTV	-5 to +20	+22 to +47
	0	0	0	0
	0	0	0	0
	0	0	0	0
	0.14713	0.114853	1.4391	0.572354
	0.156251	1.20865	2.58708	2.61509
	6.39223	1.97676	3.44	7.83251
	7.3144	7.34077	8.16722	7.84085
	8.4374	8.95956	9.3026	9.09469
	10.445	11.0108	11.2573	9.73714
	11.5894	13.4221	13.2501	10.2204
	12.5426	16.9699	13.6383	11.2181
	13.105	16.9781	13.7997	11.6507
	14.261	19.6012	15.288	11.8192
	14.415	19.7228	15.9336	11.8524
	14.9077	20.2912	16.4515	12.3029
	14.9516	20.7503	16.5359	12.4698
	15.7634	20.7596	17.0512	12.9432
	16.574	21.8283	17.6242	14.0481
	17.5372	22.3663	18.3683	14.4943
	18.009	23.5703	19.2312	14.8833
	19.4011	24.2305	20.7947	15.2191
	20.0184	24.7316	23.0578	15.353
	20.0238	25.6863	23.1085	15.3711
	20.1642	25.8511	24.1979	16.9131
	21.0445	26.5194	24.668	17.069
	21.3958	27.2679	25.035	17.1344
	22.1658	27.5462	25.1817	17.9047
	22.9036	27.8198	25.4477	18.3336
	23.1957	28.6382	25.5641	18.4102
	23.295	29.1946	27.7347	20.3549
	24.5756	29.5003	28.7114	20.4383
	25.4377	30.2725	28.7458	21.0155
	25.8589	30.8537	30.3557	21.3976
	25.9411	30.8575	31.1386	21.8337
	26.3204	33.2506	31.141	22.08
	26.5437	33.898	32.2805	23.0517
	27.0247	34.8662	32.3429	23.0752
	27.1017	39.095	33.7305	23.2787
	27.6885	39.5912	33.936	24.0166
	28.4071	42.3352	35.7886	24.4292
	29.1097	45.2867	36.8673	24.6025
	29.4792	46.5667	37.7839	25.9553
	29.6787	47.9228	39.5636	26.8148
	30.9427	52.0063	42.9385	27.1516
	31.9049	53.5329	43.4066	27.4017
	33.5612	54.282	44.3305	28.0062
	36.1	55.7231	44.894	28.1999
	41.7502	80.9657	46.0635	28.9124
	49.3395	109.621	47.0938	29.0596
	51.3339	141.68	47.8351	30.4622
			51.4016	31.0699
			53.3245	31.7076
			53.3592	31.9125
			55.3479	34.9544
			74.2636	38.9913
			77.3444	40.657
			80.3234	42.0613
			83.7321	42.4925
			84.7519	42.8607
			87.8747	46.5803
			108.995	47.3349
			168.367	48.8163
				50.6822
				52.4673
				56.0556
				60.3834
				61.9157
				62.5192
				65.1983
				69.4296
				70.2603
				78.8815
				80.1591
				82.2511
				103.439
				123.502
				132.494
				170.719
