# Supplementary material for: The out-of-field dose in radiation therapy induces delayed tumorigenesis by senescence evasion
Source: eLife. 2022 Mar 18;11:e67190. doi: 10.7554/eLife.67190 (PMC8933005; doi:10.7554/eLife.67190)
Supplement: Figure 3—figure supplement 3—source data 7. [file elife-67190-fig3-figsupp3-data7.xlsx]

## Sheet: Feuil1
Figure 3 – Figure supplement 3-source data 7
F1MC1 pH8	Non-irradiated	PTV	-5 to +20	+22 to +47
	0.003125	0.002329	0.009682	0.012306
	0.012148	0.004659	0.073681	0.013308
	0.020069	0.016843	0.099809	0.01447
	0.025365	0.029027	0.147768	0.029138
	0.031451	0.029234	0.179936	0.030037
	0.040879	0.02944	0.195925	0.038104
	0.044891	0.045278	0.238328	0.040517
	0.04655	0.061116	0.239637	0.043966
	0.050133	0.092778	0.246345	0.055201
	0.071638	0.12444	0.262939	0.059188
	0.078764	0.150708	0.269491	0.070677
	0.079103	0.176976	0.335662	0.073454
	0.081409	0.222047	0.346731	0.09351
	0.091222	0.267118	0.348928	0.107497
	0.097346	0.283062	0.387605	0.124425
	0.104987	0.299006	0.414015	0.141316
	0.107591	0.359675	0.422343	0.141386
	0.110796	0.420344	0.606002	0.159399
	0.125495	0.455744	0.650504	0.164399
	0.139583	0.491144	0.673935	0.166965
	0.146063	0.492817	0.971699	0.1814
	0.18215	0.49449	0.974284	0.201494
	0.185181	0.519418	1.17617	0.226021
	0.211665	0.544347	1.19148	0.239986
	0.225497	0.576791	1.27132	0.266321
	0.278118	0.609235	1.33994	0.273058
	0.281734	0.610097	1.39003	0.275309
	0.299006	0.610958	1.41911	0.428235
	0.348173	0.701101	1.57385	0.432233
	0.412088	0.791244	1.68657	0.453657
	0.41499	0.796615	1.74878	0.479079
	0.472664	0.801986	1.77907	0.485045
	0.503409	0.858097	1.80943	0.527262
	0.576752	0.914208	1.83036	0.546475
	0.662054	0.916231	2.132	0.593335
	0.716155	0.918253	2.16012	0.608543
	0.775592	1.11879	2.17228	0.666757
	0.874361	1.31932	2.17463	0.692437
	0.891275	1.46891	2.20141	0.784289
	1	1.6185	3.17466	0.804586
	1.32938	1.82539	3.26747	0.811215
	1.62701	2.03228	3.97603	0.860422
	1.96772	2.10813	3.98901	0.881299
	2.09551	2.18399	4.44179	0.890874
	2.12667	2.32966	4.56122	0.929241
	2.41934	2.47533	4.91749	0.938299
	2.45055	2.5924	5.8122	0.990123
	4.37679	2.70947	5.86863	1.03256
	4.38804	3.23971	6.64485	1.04048
	5.16578	3.76995	6.84421	1.20214
	5.66914	3.91662	7.48651	1.21741
	6.24542	4.0633	9.67044	1.23087
	7.1945	4.10499	14.3968	1.29512
	9.7197	4.14667	18.9571	1.30497
	11.7411	4.19192	19.7284	1.38284
	13.4011	4.23716	25.6284	1.43785
	16.6904	4.44419	27.4366	1.4462
	18.4374	4.65121	35.8886	1.45777
	26.868	6.36607	43.0391	1.49646
		8.08092	72.0035	1.50364
		10.1146	103.169	1.66195
		12.1482		1.70693
		12.5707		1.80942
		12.9932		1.85053
		18.7613		1.89334
		24.5293		2.05154
		26.7238		2.21078
		28.9183		2.2559
		39.6283		2.27718
		50.3382		2.2795
		61.0944		2.64277
		67.8682		2.9546
		71.8506		3.00149
		89.5166		3.05693
		107.183		4.13701
		121.46		5.83677
		135.737		6.72094
				9.40315
				11.1048
				23.4469
				28.0989
				51.3733
				64.4379
				156.297
