# Supplementary material for: The out-of-field dose in radiation therapy induces delayed tumorigenesis by senescence evasion
Source: eLife. 2022 Mar 18;11:e67190. doi: 10.7554/eLife.67190 (PMC8933005; doi:10.7554/eLife.67190)
Supplement: Figure 3—figure supplement 4—source data 1. [file elife-67190-fig3-figsupp4-data1.xlsx]

## Sheet: XRCC1 stat 20 versus 6 MV 2 Gy 
Figure 3-Figure supplement 4-source data 1
	ctr	8_20MV	8_6MV	2_20MV	2_6MV
A1	4.1616	62	61.0441	38.3867	35.1471			0.633895	0.913066									15.4633	66.1359	72.1409	38.479	38.9735			0.00545145	0.00897796	0.00116842	0.00465932			Non-irradiated
B1	5.28228	87.2436	53.7049	45.5256	31.3934			0.188332	0.22341										69.9065	92.7088	38.4659	46.1286			0.000646974	0.0101862	0.000493522	0.0068588		PTV
C1	19.9682	54.3922	96.4231	36.451	46.8462			0.595969	0.548407										73.9892	78.4118	40.9556	38.703			0.00213535	0.000708694	0.00112479	0.000553056		Margin (distance in mm)	-4 to 4
D1	17.1534	60.9079	77.3913	33.5526	42.5072			0.116405	0.531262										81.4562	60.2062	39.0677	34.0961			0.000612818	0.0188749	0.0331244	0.011283			5 to 13
A2	13.6034	73.7374	58.7931	42.9899	33.6034			0.606006	0.246064										64.7637	61.9878	37.7629	34.4906			1.38984e-11	0.00171689	2.00298e-07	0.000971011			14 to 22
B2	24.1899	79.6789	91.5063	41.1927	44.1899			0.652749	0.260866										67.675	63.4822	38.2024	34.1027			0.00246274	0.00491848	0.000398794	0.0023879			23 to 31
C2	36.6316	65.5357	124.25	36.3214	56.6316			0.0211125	0.0310007										69.5943	48.2455	39.8579	29.95			0.00172381	0.000375992	0.00165692	0.000241407			32 to 40
D2	30.0893	60.6742	96.2857	33.3596	50.0893			0.0685672	0.160045										45.6126	69.6157	30.8512	38.4653			0.0293174	0.00509777	0.0122938	0.00526957			41 to 49
A3	14.2909	65.5422	67.9455	39.4217	34.2909			0.738172	0.329755										59.1337	56.0451	36.6545	33.1305			0.00122502	0.01232	0.000321449	0.00368439
B3	15.3265	84.0101	72.4286	45.2929	35.3265			0.845864	0.76632										60.8938	59.2659	36.1396	35.0458			0.000870839	0.00717932	0.000235383	0.00419366
C3	22.9383	61.2024	85.3951	33.9167	42.9383			0.870363	0.592091										55.7656	53.9086	35.4064	32.9938			0.0076316	0.0208579	0.00310865	0.00875546
D3	22.2561	85.2022	87.878	45.191	42.2561			0.939282	0.35356										66.2589	66.8063	39.8157	36.8124			0.00199161	0.000855807	0.000960982	8.46842e-06
A4	11.64	74.5806	57.26	42.9247	31.64
B4	6.5614	88.7949	36.7895	47.1923	26.5614			8 Gy	2Gy									15.4633
C4	14.3194	71.6515	62.5139	20.0303	34.3194		ptv	0.376678	0.387286										72.5289	73.3286	39.063	38.3546			0.000848784	0.00787165	0.00868573	0.00491646	***	**	**	**
D4	23.8636	90.7978	84.2614	46.1236	43.8636		-4 to 4	0.652749	0.260866										67.675	63.4822	38.2024	34.1027			0.00246274	0.00491848	0.000398794	0.0023879	**	**	***	**
A5	16.2703	64.1667	64.6486	39.3571	36.2703		5 to 13	0.0211125	0.0310007										69.5943	48.2455	39.8579	29.95			0.00172381	0.000375992	0.00165692	0.000241407	**	***	**	***
B5	8.07792	67.8586	47.8701	40.101	28.0779		14 to 22	0.0685672	0.160045										45.6126	69.6157	30.8512	38.4653			0.0293174	0.00509777	0.0122938	0.00526957	*	**	*	**
C5	17.7467	63.875	67.2267	35.7273	37.7467		23 to 31	0.738172	0.329755										59.1337	56.0451	36.6545	33.1305			0.00122502	0.01232	0.000321449	0.00368439	**	*	***	**
D5	15.8676	63.1546	68.2059	35.866	35.8676		32 to 40	0.845864	0.76632										60.8938	59.2659	36.1396	35.0458			0.000870839	0.00717932	0.000235383	0.00419366	***	**	***	**
A6	14.8621	78.75	66.0517	42.25	34.8621		41 to 49	0.870363	0.592091										55.7656	53.9086	35.4064	32.9938			0.0076316	0.0208579	0.00310865	0.00875546	**	*	**	**
B6	7.10526	68.4878	43.9579	39.878	27.1053
C6	15.3611	51.3827	71.4722	32.284	35.3611													6.73992
D6	19.0824	72.0795	72.4471	38.3977	39.0824														14.4671	18.9756	5.1005	6.98965		6.73992
A7	11.66	78.8816	51.78	44.2368	31.66														8.45606	26.8289	4.41872	9.77479			8.17443	16.3966	6.24162	6.47845
B7	9.23188	79.1348	49.4783	45.2809	29.2319														12.3963	9.72484	5.43598	4.5251			11.6641	13.3168	4.2527	5.03063
C7	5.96053	59.9787	40.4605	34.5319	25.9605														9.73871	19.5021	12.8205	7.2631			10.872	5.28284	5.68576	3.07355
D7	12.9474	60.382	51.2632	35.382	32.9474														2.10664	9.53065	2.29129	4.35079			15.5492	15.0766	6.30353	7.08294
A8	11.4026	66.7065	55.4416	39.6848	31.4026														11.6641	13.3168	4.2527	5.03063			8.29047	15.2962	3.95948	5.28125
B8	14.5205	32.5217	58.5342	25.6957	34.5205														10.872	5.28284	5.68576	3.07355			7.87731	13.7716	3.75202	5.88332
C8	20.4706	47.8155	77.8118	30.9903	40.4706														15.5492	15.0766	6.30353	7.08294			12.9858	17.4257	5.58346	6.43539
D8	27.4675	35.4068	86.6753	27.0339	47.4675														8.29047	15.2962	3.95948	5.28125
A9	8.13846	67.1884	38.8154	41.6667	28.1385														7.87731	13.7716	3.75202	5.88332				0.633895		0.913066
B9	9.05479	65.2667	47.5068	37.8952	29.0548														12.9858	17.4257	5.58346	6.43539				0.188332		0.22341		0.376678		0.387286
C9	18.3827	53.2771	68.642	34.1687	38.3827														10.7097	8.641	5.11636	2.79656				0.595969		0.548407		0.652749		0.260866
D9	16.9459	50.8028	69.2162	32.8873	36.9459																					0.116405		0.531262		0.0211125		0.0310007
A10	20.2581	58.95	73.3548	37.6375	40.2581																					0.606006		0.246064		0.0685672		0.160045
B10	7.40741	54.2427	43.6543	32.4369	27.4074																					0.652749		0.260866		0.738172		0.329755
C10	13.4853	58.0778	52.1029	33.7889	33.4853																					0.0211125		0.0310007		0.845864		0.76632
D10	19.0323	72.3048	67.9516	40.6952	39.0323																					0.0685672		0.160045		0.870363		0.592091
A11	9.72881	65.0606	46.4407	39.9394	29.7288																					0.738172		0.329755
B11	20.4912	55.5909	72.5263	34.8977	40.4912																					0.845864		0.76632
C11	15.7976	64.951	63.2738	39.0784	35.7976																					0.870363		0.592091
D11	5.95745	37.46	33.3936	27.71	25.9575																					0.939282		0.35356
A12	15.1458	65.5714	63.5625	37.7143	35.1458
B12	20.2778	68.7432	78.5	43.3243	40.2778
C12	17.7917	78.3187	67.1111	44.6264	37.7917
D12	14.0345	52.4022	58.0517	33.5978	34.0345

## Sheet: XRCC1
Figure 3-Figure supplement 4-source data
	ctr	8_20MV	8_6MV	2_20MV	2_6MV
A1	4.1616	62	61.0441	38.3867	35.1471		15.4633	66.1359	72.1409	38.479	38.9735			0.00545145	0.00897796	0.00116842	0.00465932			Non-irradiated
B1	5.28228	87.2436	53.7049	45.5256	31.3934			69.9065	92.7088	38.4659	46.1286			0.000646974	0.0101862	0.000493522	0.0068588		PTV
C1	19.9682	54.3922	96.4231	36.451	46.8462			73.9892	78.4118	40.9556	38.703			0.00213535	0.000708694	0.00112479	0.000553056		Margin (distance in mm)	-4 to 4
D1	17.1534	60.9079	77.3913	33.5526	42.5072			81.4562	60.2062	39.0677	34.0961			0.000612818	0.0188749	0.0331244	0.011283			5 to 13
A2	13.6034	73.7374	58.7931	42.9899	33.6034			64.7637	61.9878	37.7629	34.4906			1.38984e-11	0.00171689	2.00298e-07	0.000971011			14 to 22
B2	24.1899	79.6789	91.5063	41.1927	44.1899			67.675	63.4822	38.2024	34.1027			0.00246274	0.00491848	0.000398794	0.0023879			23 to 31
C2	36.6316	65.5357	124.25	36.3214	56.6316			69.5943	48.2455	39.8579	29.95			0.00172381	0.000375992	0.00165692	0.000241407			32 to 40
D2	30.0893	60.6742	96.2857	33.3596	50.0893			45.6126	69.6157	30.8512	38.4653			0.0293174	0.00509777	0.0122938	0.00526957			41 to 49
A3	14.2909	65.5422	67.9455	39.4217	34.2909			59.1337	56.0451	36.6545	33.1305			0.00122502	0.01232	0.000321449	0.00368439
B3	15.3265	84.0101	72.4286	45.2929	35.3265			60.8938	59.2659	36.1396	35.0458			0.000870839	0.00717932	0.000235383	0.00419366
C3	22.9383	61.2024	85.3951	33.9167	42.9383			55.7656	53.9086	35.4064	32.9938			0.0076316	0.0208579	0.00310865	0.00875546
D3	22.2561	85.2022	87.878	45.191	42.2561			66.2589	66.8063	39.8157	36.8124			0.00199161	0.000855807	0.000960982	8.46842e-06
A4	11.64	74.5806	57.26	42.9247	31.64
B4	6.5614	88.7949	36.7895	47.1923	26.5614		15.4633
C4	14.3194	71.6515	62.5139	20.0303	34.3194			72.5289	73.3286	39.063	38.3546			0.000848784	0.00787165	0.00868573	0.00491646	***	**	**	**
D4	23.8636	90.7978	84.2614	46.1236	43.8636			67.675	63.4822	38.2024	34.1027			0.00246274	0.00491848	0.000398794	0.0023879	**	**	***	**
A5	16.2703	64.1667	64.6486	39.3571	36.2703			69.5943	48.2455	39.8579	29.95			0.00172381	0.000375992	0.00165692	0.000241407	**	***	**	***
B5	8.07792	67.8586	47.8701	40.101	28.0779			45.6126	69.6157	30.8512	38.4653			0.0293174	0.00509777	0.0122938	0.00526957	*	**	*	**
C5	17.7467	63.875	67.2267	35.7273	37.7467			59.1337	56.0451	36.6545	33.1305			0.00122502	0.01232	0.000321449	0.00368439	**	*	***	**
D5	15.8676	63.1546	68.2059	35.866	35.8676			60.8938	59.2659	36.1396	35.0458			0.000870839	0.00717932	0.000235383	0.00419366	***	**	***	**
A6	14.8621	78.75	66.0517	42.25	34.8621			55.7656	53.9086	35.4064	32.9938			0.0076316	0.0208579	0.00310865	0.00875546	**	*	**	**
B6	7.10526	68.4878	43.9579	39.878	27.1053
C6	15.3611	51.3827	71.4722	32.284	35.3611		6.73992
D6	19.0824	72.0795	72.4471	38.3977	39.0824			14.4671	18.9756	5.1005	6.98965		6.73992
A7	11.66	78.8816	51.78	44.2368	31.66			8.45606	26.8289	4.41872	9.77479			8.17443	16.3966	6.24162	6.47845
B7	9.23188	79.1348	49.4783	45.2809	29.2319			12.3963	9.72484	5.43598	4.5251			11.6641	13.3168	4.2527	5.03063
C7	5.96053	59.9787	40.4605	34.5319	25.9605			9.73871	19.5021	12.8205	7.2631			10.872	5.28284	5.68576	3.07355
D7	12.9474	60.382	51.2632	35.382	32.9474			2.10664	9.53065	2.29129	4.35079			15.5492	15.0766	6.30353	7.08294
A8	11.4026	66.7065	55.4416	39.6848	31.4026			11.6641	13.3168	4.2527	5.03063			8.29047	15.2962	3.95948	5.28125
B8	14.5205	32.5217	58.5342	25.6957	34.5205			10.872	5.28284	5.68576	3.07355			7.87731	13.7716	3.75202	5.88332
C8	20.4706	47.8155	77.8118	30.9903	40.4706			15.5492	15.0766	6.30353	7.08294			12.9858	17.4257	5.58346	6.43539
D8	27.4675	35.4068	86.6753	27.0339	47.4675			8.29047	15.2962	3.95948	5.28125
A9	8.13846	67.1884	38.8154	41.6667	28.1385			7.87731	13.7716	3.75202	5.88332				0.633895		0.913066
B9	9.05479	65.2667	47.5068	37.8952	29.0548			12.9858	17.4257	5.58346	6.43539				0.188332		0.22341		0.376678		0.387286
C9	18.3827	53.2771	68.642	34.1687	38.3827			10.7097	8.641	5.11636	2.79656				0.595969		0.548407		0.652749		0.260866
D9	16.9459	50.8028	69.2162	32.8873	36.9459										0.116405		0.531262		0.0211125		0.0310007
A10	20.2581	58.95	73.3548	37.6375	40.2581										0.606006		0.246064		0.0685672		0.160045
B10	7.40741	54.2427	43.6543	32.4369	27.4074										0.652749		0.260866		0.738172		0.329755
C10	13.4853	58.0778	52.1029	33.7889	33.4853										0.0211125		0.0310007		0.845864		0.76632
D10	19.0323	72.3048	67.9516	40.6952	39.0323										0.0685672		0.160045		0.870363		0.592091
A11	9.72881	65.0606	46.4407	39.9394	29.7288										0.738172		0.329755
B11	20.4912	55.5909	72.5263	34.8977	40.4912										0.845864		0.76632
C11	15.7976	64.951	63.2738	39.0784	35.7976										0.870363		0.592091
D11	5.95745	37.46	33.3936	27.71	25.9575										0.939282		0.35356
A12	15.1458	65.5714	63.5625	37.7143	35.1458
B12	20.2778	68.7432	78.5	43.3243	40.2778
C12	17.7917	78.3187	67.1111	44.6264	37.7917
D12	14.0345	52.4022	58.0517	33.5978	34.0345

## Sheet: 53BP1 stat 20 versus 6 MV 2Gy
Figure 3-Figure supplement 4-source data
	ctr	8_20MV	8_6MV	2_20MV	2_6MV
A1	0.96	13.1765	16.6094	14.5227	6.28235		0.879698	13.6948	14.4624	15.8473	8.20368			0.00273214	0.000978762	0.000445649	0.00648278
B1	0.43478	16.6126	15.9579	15.8846	10.9077			18.8368	14.5969	16.6805	8.04384			0.000773976	0.032863	0.00317475	0.00396687		Non-irradiated
C1	0.891892	10.0355	12.46	18.4026	9.01064			11.9474	10.6848	12.0103	8.46322			0.00604329	0.0247053	0.0015431	0.0101873	PTV
D1	0.18571	14.9545	12.8222	14.5795	6.61404			19.9997	10.6704	10.9499	7.38553			0.000426878	0.0152097	0.00178856	0.0379441	Margin (distance in mm)	-4 to 4
A2	0.43478	15.5682	18.878	17.9342	7.02679			12.7835	13.3428	8.28175	6.49688			0.00664038	0.0331216	0.109843	0.00618924		5 to 13
B2	0.857143	19.9099	21.2429	13.7789	6.90714			9.29654	8.72242	4.43445	3.77887			0.000675411	0.00126518	0.0219866	0.0164037		14 to 22
C2	0.49123	21.6304	4.8	21.274	10.7229			4.03453	4.34444	3.30945	1.73944			0.00717396	0.0131684	0.0361172	0.0571722		23 to 31
D2	0.46835	18.2386	13.4667	13.7349	7.51852			3.4803	2.88515	2.75581	1.73679			0.0336628	0.060454	0.0481734	0.184313		32 to 40
A3	0.98438	7.35294	10.8629	9.53086	9.64368			2.57523	2.49174	2.36397	1.70028			0.0896348	0.0272108	0.00288466	0.0941064		41 to 49
B3	0.924242	12.3798	14.1789	11.1961	7.54945			2.44308	3.0006	3.29251	1.89585			0.108436	0.0670738	0.02436	0.132857
C3	1.05634	14.5495	4.01471	13.3902	11.3699			2.95422	3.03122	2.79665	1.91799			0.0263936	0.0818452	0.0899636	0.0781458
D3	1.21818	13.5072	13.6825	13.9241	5.28986			2.95878	4.29387	1.97879	2.34827			0.104465	0.0170229	0.144447	0.014846
A4	1.38462	21.241	13.4421	9.28723	4.16304
B4	1.12613	18.6667	14.3826	11.5612	10.4211		0.879698
C4	1.5625	22.5	8.72131	13.4167	10.6957			15.8919	12.3237	11.9806	7.59737			0.00347113	0.0264749	0.0290873	0.0145719	**	*	*	*
D4	1	17.5912	6.13559	9.53465	4.2623			9.29654	8.72242	4.43445	3.77887			0.000675411	0.00126518	0.0219866	0.0164037	***	**	*	*
A5	0.98333	10.9452	13.4314	4.63348	6.15584			4.03453	4.34444	3.30945	1.73944			0.00717396	0.0131684	0.0361172	0.0571722	**	*	*	*
B5	1.65152	11.7739	22.2162	6.06502	6.35849			3.4803	2.88515	2.75581	1.73679			0.0336628	0.060454	0.0481734	0.184313	*	NS	*	NS
C5	0.0678	18.0256	6.23469	4.34439	8.73034			2.57523	2.49174	2.36397	1.70028			0.0896348	0.0272108	0.00288466	0.0941064	NS	*	**	NS
D5	1.0411	10.3895	11.4889	18.0841	4.74286			2.44308	3.0006	3.29251	1.89585			0.108436	0.0670738	0.02436	0.132857	NS	NS	*	NS
A6	0.63265	7.8254	8.67692	2.95717	2.37778			2.95422	3.03122	2.79665	1.91799			0.0263936	0.0818452	0.0899636	0.0781458	*	NS	NS	NS
B6	0.836735	10.6241	10.2483	4.28571	3.28866
C6	0.47619	9.84615	9.02941	3.74082	5.1875		0.586758
D6	1.48256	8.89051	6.93506	6.7541	4.26154			2.81422	2.12493	1.81593	2.1742			0.586758
A7	1.93488	2.70588	4.64463	1.7963	1.68696			2.58182	7.29735	3.64087	1.80553				2.89363	5.63426	3.54614	2.43857
B7	1.02727	4.40789	6.08871	3.61818	1.93578			3.18852	4.68034	2.0312	2.62979				1.21018	1.36861	1.63975	1.21389
C7	0.0116279	5.08889	3.58491	2.81395	2.375			2.26348	3.90838	1.93444	3.66565				1.00436	1.33672	1.35648	0.592387
D7	0.185185	3.93548	3.05952	5.00935	0.96			3.54069	6.651	6.57806	1.65332				1.41194	1.37447	1.17612	0.999273
A8	0.83077	2.76596	4.42963	1.84211	1.43478			1.21018	1.36861	1.63975	1.21389				1.37705	0.825961	0.425903	0.689257
B8	0.10305	3.15924	3.4878	2.17557	0.891892			1.00436	1.33672	1.35648	0.592387				1.38601	1.51638	1.16712	0.99661
C8	0.66296	2.44375	2.36559	2.53782	3.18571			1.41194	1.37447	1.17612	0.999273				1.03838	1.67509	1.55776	0.801754
D8	0.25591	5.55224	1.25758	4.46774	1.43478			1.37705	0.825961	0.425903	0.689257
A9	1.65605	1.37956	2.97872	3	0.857143			1.38601	1.51638	1.16712	0.99661				0.679634		0.00184376
B9	0.13333	2.78289	3.18333	2.10204	1.49123			1.03838	1.67509	1.55776	0.801754				0.33879		0.0107565		0.477572		0.218377
C9	0.17143	1.70395	2.46667	2.2	2.46835			1.80817	1.43962	1.12355	0.62674				0.67333		0.0796111		0.553163		0.546145
D9	3.16	4.43452	1.33824	2.15385	1.98438										0.009856		0.151832		0.724547		0.0994346
A10	1.37037	1.62644	4.51748	1.72973	0.924242										0.888311		0.631308		0.567937		0.235975
B10	1.8	1.71333	3.85294	3.77011	2.05634										0.553163		0.546145		0.921292		0.162292
C10	0.65049	1.9186	1.08654	3.19192	3.21818										0.724547		0.0994346		0.607002		0.119815
D10	0.71111	4.51397	2.54545	4.47826	1.38462										0.567937		0.235975		0.940743		0.366839
A11	1.025	1.67333	5.28395	1.8	1.12613										0.921292		0.162292
B11	1.01163	2.7234	2.96739	1.65049	1.5625										0.607002		0.119815
C11	1.06186	3.26389	2.62353	2.71111	3										0.940743		0.366839
D11	0.57732	4.15625	1.25	5.025	1.98333										0.293994		0.592096
A12	0.26437	1.13333	5.49206	1.01163	1.65152
B12	1.08654	2.17143	4.94286	1.06186	3.0678
C12	0.54545	3.16	4.52239	2.57732	2.0411
D12	0.836735	5.37037	2.21818	3.26437	2.63265

## Sheet: 53BP1
Figure 3-Figure supplement 4-source data
	ctr	8_20MV	8_6MV	2_20MV	2_6MV
A1	0.96	13.1765	16.6094	14.5227	6.28235		0.879698	13.6948	14.4624	15.8473	8.20368			0.00273214	0.000978762	0.000445649	0.00648278
B1	0.43478	16.6126	15.9579	15.8846	10.9077			18.8368	14.5969	16.6805	8.04384			0.000773976	0.032863	0.00317475	0.00396687		Non-irradiated
C1	0.891892	10.0355	12.46	18.4026	9.01064			11.9474	10.6848	12.0103	8.46322			0.00604329	0.0247053	0.0015431	0.0101873	PTV
D1	0.18571	14.9545	12.8222	14.5795	6.61404			19.9997	10.6704	10.9499	7.38553			0.000426878	0.0152097	0.00178856	0.0379441	Margin (distance in mm)	-4 to 4
A2	0.43478	15.5682	18.878	17.9342	7.02679			12.7835	13.3428	8.28175	6.49688			0.00664038	0.0331216	0.109843	0.00618924		5 to 13
B2	0.857143	19.9099	21.2429	13.7789	6.90714			9.29654	8.72242	4.43445	3.77887			0.000675411	0.00126518	0.0219866	0.0164037		14 to 22
C2	0.49123	21.6304	4.8	21.274	10.7229			4.03453	4.34444	3.30945	1.73944			0.00717396	0.0131684	0.0361172	0.0571722		23 to 31
D2	0.46835	18.2386	13.4667	13.7349	7.51852			3.4803	2.88515	2.75581	1.73679			0.0336628	0.060454	0.0481734	0.184313		32 to 40
A3	0.98438	7.35294	10.8629	9.53086	9.64368			2.57523	2.49174	2.36397	1.70028			0.0896348	0.0272108	0.00288466	0.0941064		41 to 49
B3	0.924242	12.3798	14.1789	11.1961	7.54945			2.44308	3.0006	3.29251	1.89585			0.108436	0.0670738	0.02436	0.132857
C3	1.05634	14.5495	4.01471	13.3902	11.3699			2.95422	3.03122	2.79665	1.91799			0.0263936	0.0818452	0.0899636	0.0781458
D3	1.21818	13.5072	13.6825	13.9241	5.28986			2.95878	4.29387	1.97879	2.34827			0.104465	0.0170229	0.144447	0.014846
A4	1.38462	21.241	13.4421	9.28723	4.16304
B4	1.12613	18.6667	14.3826	11.5612	10.4211		0.879698
C4	1.5625	22.5	8.72131	13.4167	10.6957			15.8919	12.3237	11.9806	7.59737			0.00347113	0.0264749	0.0290873	0.0145719	**	*	*	*
D4	1	17.5912	6.13559	9.53465	4.2623			9.29654	8.72242	4.43445	3.77887			0.000675411	0.00126518	0.0219866	0.0164037	***	**	*	*
A5	0.98333	10.9452	13.4314	4.63348	6.15584			4.03453	4.34444	3.30945	1.73944			0.00717396	0.0131684	0.0361172	0.0571722	**	*	*	*
B5	1.65152	11.7739	22.2162	6.06502	6.35849			3.4803	2.88515	2.75581	1.73679			0.0336628	0.060454	0.0481734	0.184313	*	NS	*	NS
C5	0.0678	18.0256	6.23469	4.34439	8.73034			2.57523	2.49174	2.36397	1.70028			0.0896348	0.0272108	0.00288466	0.0941064	NS	*	**	NS
D5	1.0411	10.3895	11.4889	18.0841	4.74286			2.44308	3.0006	3.29251	1.89585			0.108436	0.0670738	0.02436	0.132857	NS	NS	*	NS
A6	0.63265	7.8254	8.67692	2.95717	2.37778			2.95422	3.03122	2.79665	1.91799			0.0263936	0.0818452	0.0899636	0.0781458	*	NS	NS	NS
B6	0.836735	10.6241	10.2483	4.28571	3.28866
C6	0.47619	9.84615	9.02941	3.74082	5.1875		0.586758
D6	1.48256	8.89051	6.93506	6.7541	4.26154			2.81422	2.12493	1.81593	2.1742			0.586758
A7	1.93488	2.70588	4.64463	1.7963	1.68696			2.58182	7.29735	3.64087	1.80553				2.89363	5.63426	3.54614	2.43857
B7	1.02727	4.40789	6.08871	3.61818	1.93578			3.18852	4.68034	2.0312	2.62979				1.21018	1.36861	1.63975	1.21389
C7	0.0116279	5.08889	3.58491	2.81395	2.375			2.26348	3.90838	1.93444	3.66565				1.00436	1.33672	1.35648	0.592387
D7	0.185185	3.93548	3.05952	5.00935	0.96			3.54069	6.651	6.57806	1.65332				1.41194	1.37447	1.17612	0.999273
A8	0.83077	2.76596	4.42963	1.84211	1.43478			1.21018	1.36861	1.63975	1.21389				1.37705	0.825961	0.425903	0.689257
B8	0.10305	3.15924	3.4878	2.17557	0.891892			1.00436	1.33672	1.35648	0.592387				1.38601	1.51638	1.16712	0.99661
C8	0.66296	2.44375	2.36559	2.53782	3.18571			1.41194	1.37447	1.17612	0.999273				1.03838	1.67509	1.55776	0.801754
D8	0.25591	5.55224	1.25758	4.46774	1.43478			1.37705	0.825961	0.425903	0.689257
A9	1.65605	1.37956	2.97872	3	0.857143			1.38601	1.51638	1.16712	0.99661				0.679634		0.00184376
B9	0.13333	2.78289	3.18333	2.10204	1.49123			1.03838	1.67509	1.55776	0.801754				0.33879		0.0107565		0.477572		0.218377
C9	0.17143	1.70395	2.46667	2.2	2.46835			1.80817	1.43962	1.12355	0.62674				0.67333		0.0796111		0.553163		0.546145
D9	3.16	4.43452	1.33824	2.15385	1.98438										0.009856		0.151832		0.724547		0.0994346
A10	1.37037	1.62644	4.51748	1.72973	0.924242										0.888311		0.631308		0.567937		0.235975
B10	1.8	1.71333	3.85294	3.77011	2.05634										0.553163		0.546145		0.921292		0.162292
C10	0.65049	1.9186	1.08654	3.19192	3.21818										0.724547		0.0994346		0.607002		0.119815
D10	0.71111	4.51397	2.54545	4.47826	1.38462										0.567937		0.235975		0.940743		0.366839
A11	1.025	1.67333	5.28395	1.8	1.12613										0.921292		0.162292
B11	1.01163	2.7234	2.96739	1.65049	1.5625										0.607002		0.119815
C11	1.06186	3.26389	2.62353	2.71111	3										0.940743		0.366839
D11	0.57732	4.15625	1.25	5.025	1.98333										0.293994		0.592096
A12	0.26437	1.13333	5.49206	1.01163	1.65152
B12	1.08654	2.17143	4.94286	1.06186	3.0678
C12	0.54545	3.16	4.52239	2.57732	2.0411
D12	0.836735	5.37037	2.21818	3.26437	2.63265
