# Supplementary material for: The out-of-field dose in radiation therapy induces delayed tumorigenesis by senescence evasion
Source: eLife. 2022 Mar 18;11:e67190. doi: 10.7554/eLife.67190 (PMC8933005; doi:10.7554/eLife.67190)
Supplement: Figure 3—figure supplement 5—source data 1. [file elife-67190-fig3-figsupp5-data1.xlsx]

## Sheet: Feuil1
Figure 3 - Figure supplement 5 -source data 1
XRCC1 foci with gel	Non-irradiated	PTV	-5 to +20mm	+45 to +60mm	+87 to +112mm	+162 to +187mm	+87 to +112mm	+162 to +187mm
	0	14	30	7	20	2	4	7
	0	4	21	16	19	1	4	11
	0	21	18	14	8	3	1	1
	4	12	6	5	22	4	2	3
	9	8	8	1	13	2	0	3
	3	24	2	1	2	14	0	4
	2	6	0	2	4	5	1	2
	2	14	10	4	0	6	0	1
	3	23	4	4	0	3	0	0
	1	5	1	2	16	6	2	1
	4	17	3	3	2	26	0	0
	13	18	7	11	2	17	0	1
	4	9	0	0	12	32	0	6
	6	18	9	1	9	14	0	3
	3	12	4	2	1	29	0	0
	0	0	3	0	1	16	0	0
	8	3	0	5	0	3	7	2
	3	3	6	4	1	19	0	0
	3	7	15	5	4	4	2	0
	2	4	3	1	2	3	0	0
	0	11	4	27	1	0	4	0
	0	0	4	24	15	4	1	5
	1	5	2	45	11	6	1	0
	0	4	0	40	0	4	1	5
	10	7	2	46		3	5	3
		2	4	3		9	12	8
			6	4		9	4	3
			2	1		0	57	0
			0	3		2	0	0
			2	4		1	0	2
				1		3	0	0
				18		0	1	4
				17		1	0	14
						1	1	1
								5
								5
								2
								3
								0
								1
								0
								0
								5
								4
								1
								1
								1
								0
