# Supplementary material for: The out-of-field dose in radiation therapy induces delayed tumorigenesis by senescence evasion
Source: eLife. 2022 Mar 18;11:e67190. doi: 10.7554/eLife.67190 (PMC8933005; doi:10.7554/eLife.67190)
Supplement: Figure 3—figure supplement 5—source data 3. [file elife-67190-fig3-figsupp5-data3.xlsx]

## Sheet: Feuil1
Figure 3 - Figure supplement 5 -source data 3
	Non-irradiated	PTV	-5 to +20mm	+45 to +60mm	+87 to +112mm	+162 to +187mm	+87 to +112mm	+162 to +187mm
53BP1 foci with gel	1	4	13	3	1	3	2	7
	0	7	20	0	1	0	3	3
	0	15	2	0	0	0	1	6
	10	0	10	0	3	1	1	7
	0	0	10	1	2	0	2	3
	6	0	3	2	1	3	2	0
	0	0	0	3	3	0	1	1
	1	5	9	0	5	2	2	4
	0	5	3	2	0	2	3	0
	0	0	0	2	4	6	3	2
	0	0	6	3	2	1	3	2
	0	13	3	1	0	0	4	1
	0	12	6	1	1	3	15	0
	0	11	8	18	0	0	3	1
	4	5	2	4	4	0	1	0
	1	4	0	1	0	2	3	1
	0	13	3	2	0	0	8	0
	0	5	0	5	3	6	4	0
	0	2	1	2	4	2	2	0
	1	0	7	0	1	2	2	1
	1	13	1	0	2	3	2	0
	0	6	7	2	2	1	1	1
	0	18	4	5	2	0	2	1
	0	2	4	2	3	0	3
	3	9	2	5	1	1	0
	3	10	3	2	0	0	1
	3	11	1	1	1	0	4
	2	6	4	0	1	1	3
	1	7		1	0	0	2
	0	3		0	2	0	1
	2	12		0	1	1
	0	3		1	2	2
		0		3	0	2
		0		1	1	0
		3			1	6
		20			0	1
		11			0	2
		9			1	0
		0			0	0
		7			1	0
		22			1	22
		25			2	2
		18			1	11
		16			3	0
		7			6	1
		18			2	4
		34			2	17
		11			1	3
		21			0	9
		8			0	11
		4			4	1
		12			4	1
		13			4	2
		11			2	1
		20			0	0
		10			1	3
		20			1	0
		10			1	0
		3			1
		7			3
		13			0
		17			4
		0			1
		0			1
		0
		34
		9
		0
		0
		0
		0
		0
		0
		0
