# Supplementary material for: The out-of-field dose in radiation therapy induces delayed tumorigenesis by senescence evasion
Source: eLife. 2022 Mar 18;11:e67190. doi: 10.7554/eLife.67190 (PMC8933005; doi:10.7554/eLife.67190)
Supplement: Figure 3—figure supplement 6—source data 1. [file elife-67190-fig3-figsupp6-data1.xlsx]

## Sheet: EdU
Figure 3- Figure supplement 6- source data 1
	complet	serum 0,1%			serum 2%	serum 0,1%
	10.3	6.7		percent of EdU positives cells	11.6667	6.96333
	11.9	6.79		SD	1.26623	0.380832
	12.8	7.4			0.00352273

## Sheet: cell cycle
	G1	S	G2				G1	S	G2
serum 2%	55.4	27.9	14.9		serum 2%	percent of cells	51.5333	31.3333	15.0333
	47.7	34.6	15.2			SD	3.85011	3.35311	0.152753
	51.5	31.5	15		serum 0,1%	percent of cells	73.6333	18.7667	7.54
serum 0,1%	69	20.2	8.27			SD	4.08207	1.45029	1.00792
	76.7	18.8	6.39			T-test	0.00120718	0.00199197	0.000109635
	75.2	17.3	7.96
							G0/G1			S			G2/M
							serum 2%	serum 0,1%		serum 2%	serum 0,1%		serum 2%	serum 0,1%
						mean	51.5333	73.6333		31.3333	18.7667		15.0333	7.54
						SD	3.85011	4.08207		3.35311	1.45029		0.152753	1.00792
