# Supplementary material for: The out-of-field dose in radiation therapy induces delayed tumorigenesis by senescence evasion
Source: eLife. 2022 Mar 18;11:e67190. doi: 10.7554/eLife.67190 (PMC8933005; doi:10.7554/eLife.67190)
Supplement: Figure 3—figure supplement 6—source data 2. [file elife-67190-fig3-figsupp6-data2.xlsx]

## Sheet: Feuil1
Figure 3- Figure supplement 6- source data 2
comet assay	ni complet	ni serum 0,1%	PN complet	PN serum 0,1%				ni complet	ni serum 0,1%	PN complet	PN serum 0,1%
	79.4812	0	82.2032	80.1756			moyenne	141.915	130.006	166.158	174.361
	80.0128	0	97.1486	82.027			écart type	71.4444	39.8662	36.118	38.6398
	83.1933	0	98.0457	87.7924			t test (/NI)			0.0134455	4.24885e-13
	87.2284	0	108.208	91.6571			T test (complet/serum)		0.184341		0.166223
	92.9968	80.1318	116.176	109.261
	95.0896	80.7782	119.3	112.937
	100.932	83.5097	123.151	123.866
	103.746	88.6255	123.889	126.654
	103.767	91.8807	124.013	131.619
	105.638	92.6487	124.624	134.992
	105.851	97.9053	125.926	135.849
	106.427	99.1129	128.928	136.268
	107.646	99.3728	129.653	138.272
	109.215	100.566	131.232	138.336
	112.165	100.703	131.921	139.457
	112.268	101.184	132.466	139.881
	114.054	103.177	134.442	142.789
	115.099	103.839	138.027	143.772
	116.7	107.016	138.827	144.289
	118.178	107.545	138.902	144.354
	118.453	107.592	140.157	144.489
	118.538	107.975	141.631	144.911
	118.953	108.681	141.91	145.381
	119.984	108.809	142.07	147.471
	120.133	109.105	142.143	148.405
	122.772	109.674	146.363	150.286
	124.145	110.402	146.872	153.762
	125.05	110.963	147.855	154.045
	126.276	112.443	149.166	157.65
	128.184	112.617	153.655	158.63
	128.319	114.211	153.874	158.743
	139.575	114.33	155.658	160.567
	141.89	115.578	161.267	163.885
	142.588	115.791	165.428	164.103
	143.485	115.939	166.236	167.724
	145.674	116.562	170.416	168.446
	149.013	116.836	172.154	168.597
	150.096	118.76	172.722	170.053
	151.333	118.986	174.228	170.276
	151.702	119.734	175.733	170.288
	151.99	119.919	176.724	170.416
	152.62	120.481	177.398	170.459
	153.053	120.578	177.599	172.522
	153.234	120.854	177.785	172.833
	158.091	122.017	180.571	173.515
	158.728	124.582	182.801	173.522
	159.374	124.667	188.566	173.759
	167.518	124.752	188.985	173.945
	170.781	124.796	189.863	175.491
	175.802	125.436	190.355	179.771
	176.745	129.195	190.876	179.777
	178.728	129.763	191.523	181.322
	187.217	130.377	191.8	182.268
	403.278	133.205	192.306	183.247
	542.332	135.676	194.905	183.572
		135.962	194.996	183.587
		136.344	195.831	183.767
		136.706	196.622	185.273
		138.321	197.115	186.499
		138.575	197.79	189.024
		140.515	198.851	189.148
		142.16	199.17	190.856
		143.17	203.851	191.02
		143.577	204.068	191.074
		143.954	205.847	191.682
		145.571	206.978	192.034
		146.999	208.29	194.924
		148.869	210.641	195.936
		149.974	211.396	197.317
		152.27	215.253	197.917
		152.915	220.258	198.519
		153.234	232.89	198.725
		153.365	271.031	199.112
		153.712		201.165
		155.599		205.76
		157.321		206.314
		160.477		214.111
		160.679		214.116
		162.963		216.166
		164.816		217.371
		166.292		222.053
		166.297		223.667
		166.675		225.138
		167.598		225.706
		168.13		227.307
		168.912		232.885
		169.122		233.817
		171.187		246.956
		172.181		248.206
		173.442		251.881
		174.579		299.462
		177.509
		178.949
		182.741
		185.95
		191.488
		193.883
		201.631
		208.356
		208.393
