# Supplementary material for: The out-of-field dose in radiation therapy induces delayed tumorigenesis by senescence evasion
Source: eLife. 2022 Mar 18;11:e67190. doi: 10.7554/eLife.67190 (PMC8933005; doi:10.7554/eLife.67190)
Supplement: Figure 3—source data 1. [file elife-67190-fig3-data1.xlsx]

## Sheet: publi
				Figure 3-source data 1
		ctr			20min			4h			8h			24h			48h
		6.26156	1.98787		13.0966	2.45033		6.63202	2.82595		13.4034	2.61397		8.01269	2.68622		4.44082	1.35976
		8.68122	3.82076		14.2929	3.56107		9.90925	3.99124		10.6979	1.98178		7.90442	4.01134		4.26615	1.14384
		5.32241	1.47528		14.7833	4.27391		7.35445	2.58349		9.09786	3.30763		7.2821	1.95745		4.29994	1.15172			/	control		0
		5.90555	2.70169		16.7916	2.93395		9.48396	3.04591		8.23261	4.61842		9.8861	1.73528		4.29878	1.12575				In the Field	-54	100
		3.30801	1.85971		20.0676	3.12892	3.47446	8.88688	3.75745	3.34452	8.61823	3.14329	3.26278	10.8815	3.76836	2.86811	4.40912	1.19001	1.15283				-45	100
		2.84473	1.5688		20.6196	4.32295	4.32295	9.0087	4.83155	4.83155	7.93926	3.85919	3.85919	11.9333	1.7582	1.7582	4.48769	1.25769	1.25769				-36	100
		3.7497	1.77894		23.5747	5.58842	5.58842	8.15281	4.77306	4.77306	9.01671	3.11734	3.11734	15.3393	3.32645	3.32645	4.70354	1.49404	1.49404				-27	100
		2.98638	1.45071		21.7369	5.54566	5.54566	10.6566	5.67645	5.67645	7.96052	1.44528	1.44528	13.6735	3.00474	3.00474	5.11624	1.49467	1.49467				-18	100
		3.00727	2.34919		18.7489	5.74771	5.74771	10.6859	4.54051	4.54051	9.99573	1.76872	1.76872	14.0238	3.99894	3.99894	5.34424	2.0955	2.0955				-9	100
		3.96118	1.74108		17.7946	5.40606	5.40606	11.4918	4.35158	4.35158	8.92804	1.92439	1.92439	13.6854	2.39926	2.39926	5.35657	1.8717	1.8717			border at the field	0	50
		4.87372	1.97609		21.8246	5.04421	5.04421	9.83941	8.24402	8.24402	8.51374	0.69185	0.69185	13.5688	2.84664	2.84664	5.94973	2.38178	2.38178				9	20
		4.49348	2.66858		19.5086	2.56513		10.8456	6.38001		8.76891	1.51415		16.1637	4.1892		6.43728	2.41015					18	10
			0.513444																				27	8
																							36	< 5
		0	20	240	480	1440	3000																45	< 5
																						area	distance (mm)	dose (%)
		4.46402
		8.68122	14.2929	9.90925	10.6979	7.90442	4.26615
		5.32241	14.7833	7.35445	9.09786	7.2821	4.29994														/	control		0
		5.90555	16.7916	9.48396	8.23261	9.8861	4.29878															In the Field	-45	100
		3.30801	20.0676	8.88688	8.61823	10.8815	4.40912																-36	100
		2.84473	20.6196	9.0087	7.93926	11.9333	4.48769																-27	100
		3.7497	23.5747	8.15281	9.01671	15.3393	4.70354																-18	100
		2.98638	21.7369	10.6566	7.96052	13.6735	5.11624																-9	100
		3.00727	18.7489	10.6859	9.99573	14.0238	5.34424															border at the field	0	50
		3.96118	17.7946	11.4918	8.92804	13.6854	5.35657																9	20
		4.87372	21.8246	9.83941	8.51374	13.5688	5.94973																18	10
																							27	8
																							36	< 5
																						area	distance (mm)	dose (%)
		0	20	240	480	1440	2880
		4.61627	19.0235	9.54698	8.90006	11.8178	5.32
		1.99202	4.37436	4.74321	2.48837	2.99962	1.47
		0	20	240	480	1440	3000
		4.46402
			16.4838	8.90863	9.16165	8.98852	4.3185
			20.6196	9.0087	7.93926	11.9333	4.48769						Non-irradiated
			23.5747	8.15281	9.01671	15.3393	4.70354					PTV
			21.7369	10.6566	7.96052	13.6735	5.11624					Margin (distance in mm)	-4 to 4
			18.7489	10.6859	9.99573	14.0238	5.34424						5 to 13
			17.7946	11.4918	8.92804	13.6854	5.35657						14 to 22
			21.8246	9.83941	8.51374	13.5688	5.94973						23 to 31
													32 to 40
		0.513444											41 to 49
			3.47446	3.34452	3.26278	2.86811	1.15283						distance (mm)
			4.32295	4.83155	3.85919	1.7582	1.25769
			5.58842	4.77306	3.11734	3.32645	1.49404
			5.54566	5.67645	1.44528	3.00474	1.49467
			5.74771	4.54051	1.76872	3.99894	2.0955														mean	SD	étiquette
			5.40606	4.35158	1.92439	2.39926	1.8717													Non-irradiated	4.46402	0.513444
			5.04421	8.24402	0.69185	2.84664	2.38178
																			PTV		16.4838	3.47446	***
																			Margin (distance in mm)	-4 to +4	20.6196	4.32295	***
																				+5 to +13	23.5747	5.58842	***
																				+14 to +22	21.7369	5.54566	***
																				+23 to +31	18.7489	5.74771	***
																				+32 to +40	17.7946	5.40606	***
																				+41 to +49	21.8246	5.04421	***
																				distance (mm)
																				Non-irradiated
																/	Non-irradiated		PTV	-4 to 4
					/	PTV	Margin						/			PTV	-12 to -4		Margin (distance in mm)	5 to 13
					Non-irradiated	-12 to -4	-4 to 4	5 to 13	14 to 22	23 to 31	32 to 40	41 to 49	distance (mm)			Margin	-4 to 4			14 to 22
						100	50	20	10	8	< 5	< 5	dose (%)				5 to 13			23 to 31
						2	1	0.4	0.2	0.16	< 0,1	< 0,1	dose (Gy)				14 to 22			32 to 40
																	23 to 31			41 to 49
																	32 to 40			distance (mm)
																	41 to 49
																/	distance (mm)
		9.24636e-05	0.00990458	0.00405167	1.48238e-05	0.357757
		***	**	**	***	NS
		7.64829e-05	0.0731854	0.156851	1.1036e-05	0.707977
		***	NS	NS	***	NS
		1.62524e-05	0.129924	0.036231	1.42837e-06	0.727448
		***	NS	*	***	NS
		0.000613443	0.0436706	0.000936761	0.000639038	0.230165
		***	*	***	***	NS
		0.000663434	0.0203904	0.000216764	0.000377822	0.216223
		***	*	***	***	NS
		0.000654146	0.0129838	0.00154157	8.43035e-05	0.162413
		***	*	**	***	NS
		0.000174159	0.150968	2.25678e-09	0.000223305	0.103472
		***	NS	***	***	NS

## Sheet: Feuil10
		ctr			20min			4h			8h			24h			48h
		6.26156	1.98787		13.0966	2.45033		6.63202	2.82595		13.4034	2.61397		8.01269	2.68622		4.44082	1.35976
		8.68122	3.82076		14.2929	3.56107		9.90925	3.99124		10.6979	1.98178		7.90442	4.01134		4.26615	1.14384
		5.32241	1.47528		14.7833	4.27391		7.35445	2.58349		9.09786	3.30763		7.2821	1.95745		4.29994	1.15172			/	control		0
		5.90555	2.70169		16.7916	2.93395		9.48396	3.04591		8.23261	4.61842		9.8861	1.73528		4.29878	1.12575				In the Field	-54	100
		3.30801	1.85971		20.0676	3.12892	3.47446	8.88688	3.75745	3.34452	8.61823	3.14329	3.26278	10.8815	3.76836	2.86811	4.40912	1.19001	1.15283				-45	100
		2.84473	1.5688		20.6196	4.32295	4.32295	9.0087	4.83155	4.83155	7.93926	3.85919	3.85919	11.9333	1.7582	1.7582	4.48769	1.25769	1.25769				-36	100
		3.7497	1.77894		23.5747	5.58842	5.58842	8.15281	4.77306	4.77306	9.01671	3.11734	3.11734	15.3393	3.32645	3.32645	4.70354	1.49404	1.49404				-27	100
		2.98638	1.45071		21.7369	5.54566	5.54566	10.6566	5.67645	5.67645	7.96052	1.44528	1.44528	13.6735	3.00474	3.00474	5.11624	1.49467	1.49467				-18	100
		3.00727	2.34919		18.7489	5.74771	5.74771	10.6859	4.54051	4.54051	9.99573	1.76872	1.76872	14.0238	3.99894	3.99894	5.34424	2.0955	2.0955				-9	100
		3.96118	1.74108		17.7946	5.40606	5.40606	11.4918	4.35158	4.35158	8.92804	1.92439	1.92439	13.6854	2.39926	2.39926	5.35657	1.8717	1.8717			border at the field	0	50
		4.87372	1.97609		21.8246	5.04421	5.04421	9.83941	8.24402	8.24402	8.51374	0.69185	0.69185	13.5688	2.84664	2.84664	5.94973	2.38178	2.38178				9	20
		4.49348	2.66858		19.5086	2.56513		10.8456	6.38001		8.76891	1.51415		16.1637	4.1892		6.43728	2.41015					18	10
			0.513444																				27	8
																							36	< 5
		0	20	240	480	1440	3000																45	< 5
																						area	distance (mm)	dose (%)
		4.46402
		8.68122	14.2929	9.90925	10.6979	7.90442	4.26615
		5.32241	14.7833	7.35445	9.09786	7.2821	4.29994														/	control		0
		5.90555	16.7916	9.48396	8.23261	9.8861	4.29878															In the Field	-45	100
		3.30801	20.0676	8.88688	8.61823	10.8815	4.40912																-36	100
		2.84473	20.6196	9.0087	7.93926	11.9333	4.48769																-27	100
		3.7497	23.5747	8.15281	9.01671	15.3393	4.70354																-18	100
		2.98638	21.7369	10.6566	7.96052	13.6735	5.11624																-9	100
		3.00727	18.7489	10.6859	9.99573	14.0238	5.34424															border at the field	0	50
		3.96118	17.7946	11.4918	8.92804	13.6854	5.35657																9	20
		4.87372	21.8246	9.83941	8.51374	13.5688	5.94973																18	10
																							27	8
																							36	< 5
																						area	distance (mm)	dose (%)
		0	20	240	480	1440	2880
		4.61627	19.0235	9.54698	8.90006	11.8178	5.32
		1.99202	4.37436	4.74321	2.48837	2.99962	1.47
		0	20	240	480	1440	3000
		4.46402
			16.4838	8.90863	9.16165	8.98852	4.3185
			20.6196	9.0087	7.93926	11.9333	4.48769						Non-irradiated
			23.5747	8.15281	9.01671	15.3393	4.70354					PTV
			21.7369	10.6566	7.96052	13.6735	5.11624					Margin (distance in mm)	-4 to 4
			18.7489	10.6859	9.99573	14.0238	5.34424						5 to 13
			17.7946	11.4918	8.92804	13.6854	5.35657						14 to 22
			21.8246	9.83941	8.51374	13.5688	5.94973						23 to 31
													32 to 40
		0.513444											41 to 49
			3.47446	3.34452	3.26278	2.86811	1.15283						distance (mm)
			4.32295	4.83155	3.85919	1.7582	1.25769
			5.58842	4.77306	3.11734	3.32645	1.49404
			5.54566	5.67645	1.44528	3.00474	1.49467
			5.74771	4.54051	1.76872	3.99894	2.0955
			5.40606	4.35158	1.92439	2.39926	1.8717
			5.04421	8.24402	0.69185	2.84664	2.38178
																/	Non-irradiated			Non-irradiated
					/	PTV	Margin						/			PTV	-12 to -4		PTV
					Non-irradiated	-12 to -4	-4 to 4	5 to 13	14 to 22	23 to 31	32 to 40	41 to 49	distance (mm)			Margin	-4 to 4		Margin (distance in mm)	-4 to 4
						100	50	20	10	8	< 5	< 5	dose (%)				5 to 13			5 to 13
						2	1	0.4	0.2	0.16	< 0,1	< 0,1	dose (Gy)				14 to 22			14 to 22
																	23 to 31			23 to 31
																	32 to 40			32 to 40
																	41 to 49			41 to 49
																/	distance (mm)			distance (mm)
		9.24636e-05	0.00990458	0.00405167	1.48238e-05	0.357757
		***	**	**	***	NS
		7.64829e-05	0.0731854	0.156851	1.1036e-05	0.707977
		***	NS	NS	***	NS
		1.62524e-05	0.129924	0.036231	1.42837e-06	0.727448
		***	NS	*	***	NS
		0.000613443	0.0436706	0.000936761	0.000639038	0.230165
		***	*	***	***	NS
		0.000663434	0.0203904	0.000216764	0.000377822	0.216223
		***	*	***	***	NS
		0.000654146	0.0129838	0.00154157	8.43035e-05	0.162413
		***	*	**	***	NS
		0.000174159	0.150968	2.25678e-09	0.000223305	0.103472
		***	NS	***	***	NS

## Sheet: Feuil11
		ctr	20	240	480	1440	3000
	A1	3.22523	10.4306	3.38636	14.4889	9.71264	4.08397	1	3.22523	10.4306	3.38636	14.4889	9.71264	4.08397		5.81412e-05	0.17192	0.000110102	0.028159	0.621164
	A2	8.01899	14.9753	13.1446	10.5556	9.79464	4.04202		8.77215	18.3918	0.177778	12.6	8.56731	4.23771
	A3	7.66316	19.7159	7.15385	11.48	7.46602	4.20536		8.36313	9.8374	6.09412	15.6897	7.84956	4.70909
	A4	11.3289	22.6351	11.662	0.5	13.6604	4.16484		7.65584	11.8605	8.56311	10.5233	6.59055	4.32117
	A5	7.05882	24.2235	7.95238	10.0312	7.97345	4.10309		8.01156	11.7422	8.27059	16.5897	12.7692	4.83019
	A6	5.77301	30.8495	0	5.96203	12.934	4.4188		6.42405	11.8111	8.90196	13.0506	11.7465	5.22222
	A7	3.91824	32.908	0.26	11.7432	11.1513	4.65625		6.29412	13.7941	5.56604	17.3012	2.83486	4.09278
	A8	5.78146	39.3804	0.692308	11.8824	13.1429	5.47368		1.34641	16.9053	12.0962	6.98387	4.03093	4.02941
	A9	6.74026	31.6575	20.2857	10.1802	18.9937	7.61207
	A10	7.11111	11.5974	19.5965	8.56944	14.374	5.8042	2	8.01899	14.9753	13.1446	10.5556	9.79464	4.04202		8.51747	20.3875	9.97821	8.1417	9.72363	4.12883		9.24636e-05	0.00990458	0.00405167	1.48238e-05	0.357757
	A11	6.71333	25.6395	17.3061	8.44118	12.1981	6.09016		11.2731	22.2841	6.44444	9.19355	11.1026	4.18978		6.49752	19.0719	3.68943	5.46186	7.80971	4.26098		***	**	**	***	NS
	A12	8.35099	21.3019	16.175	8.48039	16.9692	6.31818		17.0963	10.2288	7.73109	8.7	15.9146	4.18621		8.79195	15.022	5.59533	5.61639	12.0471	4.27621
	B1	8.77215	18.3918	0.177778	12.6	8.56731	4.23771		12.9573	14.0503	15.2518	12.2222	7.47222	4.36719		8.35658	15.8445	15.219	8.17138	9.33663	4.3883
	B2	11.2731	22.2841	6.44444	9.19355	11.1026	4.18978		7.64773	13	17.2963	12.5565	10.8512	4.49193		3.99209	16.4491	11.2182	11.6048	8.11275	4.30591
	B3	4.24561	15.1333	1.70435	7.2766	5.16981	4.09929		3.6776	13.75	7.24348	10.3937	0.193548	4.51471		4.36279	14.9204	8.9752	8.68435	8.18609	4.58067
	B4	8.125	17.2913	4.28571	2.56	7.94079	4.25185		5.22596	6.19118	9.14407	15.2421	4.1338	4.16667		3.89411	7.85519	8.10053	14.7528	9.64531	4.33702
	B5	2.34637	21.5789	2.32323	2.81731	7.02564	4.50299		3.5528	19.8636	3.01818	6.71951	3.77273	4.17073		2.02188	22.3203	8.49313	10.8599	7.04696	4.27008
	B6	0.827411	23.9265	4.23913	2.075	7.6338	4.47015
	B7	1.82514	28.1562	0.414414	4.20635	18	4.54438	3	7.66316	19.7159	7.15385	11.48	7.46602	4.20536
	B8	1.98235	19.8571	2.89209	8.39252	6.0411	4.48322		4.24561	15.1333	1.70435	7.2766	5.16981	4.09929
	B9	1.33566	24.0102	7.06849	9.53548	10.6724	4.47826		7.11377	14.0252	4.66912	5.57857	14.8692	4.08824
	B10	4.6776	25.985	9.85263	13.4889	16.3011	4.29834		7.0914	16.5	13.3667	4.82759	7.17391	4.42683
	B11	0.674528	21.7803	0.125	9.06452	15.9877	5.33974		4.905	13.8769	9	12.963	5.84375	4.5
	B12	3.3262	19.3441	0	6.62366	13.9193	7.58824		5.3022	8.22353	8.29808	7.63551	7.34091	4.37984
	C1	8.36313	9.8374	6.09412	15.6897	7.84956	4.70909		3.37374	5.91176	5.55652	16.0811	6.77622	4.2
	C2	17.0963	10.2288	7.73109	8.7	15.9146	4.18621		2.88439	24.8795	9.08696	6.94048	3.61702	4.5
	C3	7.11377	14.0252	4.66912	5.57857	14.8692	4.08824
	C4	5.62617	15.1885	7.30526	3.79675	11.2597	4.42105	4	11.3289	22.6351	11.662	0.5	13.6604	4.16484
	C5	5.33158	20.6454	2.67586	4.39024	6.14483	4.40936		8.125	17.2913	4.28571	2.56	7.94079	4.25185
	C6	5.37113	17.6829	3.46078	2	13.3818	4.0796		5.62617	15.1885	7.30526	3.79675	11.2597	4.42105
	C7	4.57789	25.2256	4.69178	2.89474	11.2412	4.44633		8.40513	12.8655	14.4667	7.6	8.31469	4.29714
	C8	2.01705	25.5263	7.92982	6.30405	14.133	5.05348		1.19527	17.1127	10.7734	9.25444	7.16779	4.07383
	C9	1.14706	12.6853	2.51562	6.46715	9.35912	4.09877		6.56995	15.7163	6.07874	10.0517	9.18	4.61333
	C10	2	28.0992	0.492537	5.43357	13.9455	5.84211		4.97674	11.6604	8.08247	13.0405	10.369	4.36496
	C11	5.32558	26.7434	2.54237	8.216	6.69948	10.0687		1.01724	21.8632	13.2174	19.0575	11.1964	4.20325
	C12	3.07222	26.519	8.74242	12.4444	9.22436	4.70536
	D1	7.65584	11.8605	8.56311	10.5233	6.59055	4.32117	5	7.05882	24.2235	7.95238	10.0312	7.97345	4.10309
	D2	12.9573	14.0503	15.2518	12.2222	7.47222	4.36719		2.34637	21.5789	2.32323	2.81731	7.02564	4.50299
	D3	7.0914	16.5	13.3667	4.82759	7.17391	4.42683		5.33158	20.6454	2.67586	4.39024	6.14483	4.40936
	D4	8.40513	12.8655	14.4667	7.6	8.31469	4.29714		4.97248	19.9621	17.7909	8.03571	14.3857	4.46202
	D5	4.97248	19.9621	17.7909	8.03571	14.3857	4.46202		2.22034	21.8067	7.80315	11.6452	8.58824	4.15789
	D6	3.65969	12.0734	17.3047	6.28324	12.3436	4.68927		1.90141	21.9917	14.2805	6.65649	16.0299	4.81482
	D7	7.1976	19.8077	13.3864	7.47967	15.1857	4.44898		2	7.65741	9.61905	14.6475	17.3022	4.61644
	D8	2.38389	12.1829	17.7445	7.14545	11.2515	4.95135		0.633094	22.675	8.65	10.7222	9.60169	4.20635
	D9	6.56962	11.3983	13.4851	9.23622	17.7939	6.91878
	D10	3.97976	11.8868	13.4615	6.54335	6.50785	5.71622	6	5.77301	30.8495	0	5.96203	12.934	4.4188		7.64829e-05	0.0731854	0.156851	1.1036e-05	0.707977			9.24636e-05	0.00990458	0.00405167	1.48238e-05	0.357757
	D11	10.401	9.8062	22.7664	7.67769	16.6456	5.05769		0.827411	23.9265	4.23913	2.075	7.6338	4.47015		***	NS	NS	***	NS			***	**	**	***	NS
	D12	3.89055	13.9286	24.3387	8.55914	28.6901	9.96795		5.37113	17.6829	3.46078	2	13.3818	4.0796									7.64829e-05	0.0731854	0.156851	1.1036e-05	0.707977
	E1	8.01156	11.7422	8.27059	16.5897	12.7692	4.83019		3.65969	12.0734	17.3047	6.28324	12.3436	4.68927									***	NS	NS	***	NS
	E2	7.64773	13	17.2963	12.5565	10.8512	4.49193		1.46535	21.8442	10.5728	8.16883	9.2	4.71429									1.62524e-05	0.129924	0.036231	1.42837e-06	0.727448
	E3	4.905	13.8769	9	12.963	5.84375	4.5		2.85027	18.9187	12.4574	9.28058	12.8009	4.00694									***	NS	*	***	NS
	E4	1.19527	17.1127	10.7734	9.25444	7.16779	4.07383		1.79096	16.5116	13.7113	9.01439	12.9675	5.09028									0.000613443	0.0436706	0.000936761	0.000639038	0.230165
	E5	2.22034	21.8067	7.80315	11.6452	8.58824	4.15789		1.02	23.15	10.3235	20.73	14.2048	4.4322									***	*	***	***	NS
	E6	1.46535	21.8442	10.5728	8.16883	9.2	4.71429																0.000663434	0.0203904	0.000216764	0.000377822	0.216223
	E7	5.27551	27.5049	8.81061	11.9718	13.7698	4.36364	7	3.91824	32.908	0.26	11.7432	11.1513	4.65625		1.62524e-05	0.129924	0.036231	1.42837e-06	0.727448			***	*	***	***	NS
	E8	2.17742	14.1753	12.344	6.75641	14.6178	4.63158		1.82514	28.1562	0.414414	4.20635	18	4.54438		***	NS	*	***	NS			0.000654146	0.0129838	0.00154157	8.43035e-05	0.162413
	E9	1.4424	14.6525	5.44966	7.66923	10.2752	4.26291		4.57789	25.2256	4.69178	2.89474	11.2412	4.44633									***	*	**	***	NS
	E10	2.22959	12.1973	8.75789	10.0566	13.0065	4.1087		7.1976	19.8077	13.3864	7.47967	15.1857	4.44898									0.000174159	0.150968	2.25678e-09	0.000223305	0.103472
	E11	4	16.287	2.37273	6.9527	12.7237	5.02235		5.27551	27.5049	8.81061	11.9718	13.7698	4.36364									***	NS	***	***	NS
	E12	11.3103	16.525	0.0714286	6.98837	15.6519	5.7482		2.85027	18.9187	12.4574	9.28058	12.8009	4.00694
	F1	6.42405	11.8111	8.90196	13.0506	11.7465	5.22222		1.79096	16.5116	13.7113	9.01439	12.9675	5.09028
	F2	3.6776	13.75	7.24348	10.3937	0.193548	4.51471		1.02	23.15	10.3235	20.73	14.2048	4.4322
	F3	5.3022	8.22353	8.29808	7.63551	7.34091	4.37984
	F4	6.56995	15.7163	6.07874	10.0517	9.18	4.61333	8	5.78146	39.3804	0.692308	11.8824	13.1429	5.47368		0.000613443	0.0436706	0.000936761	0.000639038	0.230165
	F5	1.90141	21.9917	14.2805	6.65649	16.0299	4.81482		1.98235	19.8571	2.89209	8.39252	6.0411	4.48322		***	*	***	***	NS
	F6	2.85027	18.9187	12.4574	9.28058	12.8009	4.00694		2.01705	25.5263	7.92982	6.30405	14.133	5.05348
	F7	4.895	26.4324	11.4602	11.0082	12.0429	4		2.38389	12.1829	17.7445	7.14545	11.2515	4.95135
	F8	3.0566	19.92	20.3967	7.00658	15.9557	5.01523		2.17742	14.1753	12.344	6.75641	14.6178	4.63158
	F9	1.02094	16.3114	11.7064	12.9008	18.0909	4.70057		3.0566	19.92	20.3967	7.00658	15.9557	5.01523
	F10	6.35503	20.9237	17.5612	8.63971	11.9448	4.90909		5.92391	20.3663	14.8469	9.38776	22.0065	6.7375
	F11	4.9593	32.1875	14.2222	9.47887	12.345	4.11602		0.568345	22.4865	8.40625	6.80899	12.2396	4.58389
	F12	2.96842	17.9762	9.04839	7.43056	19.5316	4.81818
	G1	6.29412	13.7941	5.56604	17.3012	2.83486	4.09278	9	6.74026	31.6575	20.2857	10.1802	18.9937	7.61207		0.000663434	0.0203904	0.000216764	0.000377822	0.216223
	G2	5.22596	6.19118	9.14407	15.2421	4.1338	4.16667		1.33566	24.0102	7.06849	9.53548	10.6724	4.47826		***	*	***	***	NS
	G3	3.37374	5.91176	5.55652	16.0811	6.77622	4.2		1.14706	12.6853	2.51562	6.46715	9.35912	4.09877
	G4	4.97674	11.6604	8.08247	13.0405	10.369	4.36496		6.56962	11.3983	13.4851	9.23622	17.7939	6.91878
	G5	2	7.65741	9.61905	14.6475	17.3022	4.61644		1.4424	14.6525	5.44966	7.66923	10.2752	4.26291
	G6	1.79096	16.5116	13.7113	9.01439	12.9675	5.09028		1.02094	16.3114	11.7064	12.9008	18.0909	4.70057
	G7	1.36898	15.1183	13.9535	11.2268	23.3677	6.67969		5.1087	15.7063	15.4286	10.3193	17.2125	5.88387
	G8	5.92391	20.3663	14.8469	9.38776	22.0065	6.7375		0.693548	23.5699	9.54795	13.6575	9.79279	4.7987
	G9	5.1087	15.7063	15.4286	10.3193	17.2125	5.88387
	G10	4.64671	16.1102	9.45794	7.75658	17.2048	7.55056	10	7.11111	11.5974	19.5965	8.56944	14.374	5.8042		0.000654146	0.0129838	0.00154157	8.43035e-05	0.162413
	G11	3.92308	19.248	1.34146	9.45139	19.4597	7.21739		4.6776	25.985	9.85263	13.4889	16.3011	4.29834		***	*	**	***	NS
	G12	2.31579	20.7791	16.56	8.47475	16.2206	7.39623		2	28.0992	0.492537	5.43357	13.9455	5.84211
	H1	1.34641	16.9053	12.0962	6.98387	4.03093	4.02941		3.97976	11.8868	13.4615	6.54335	6.50785	5.71622
	H2	3.5528	19.8636	3.01818	6.71951	3.77273	4.17073		2.22959	12.1973	8.75789	10.0566	13.0065	4.1087
	H3	2.88439	24.8795	9.08696	6.94048	3.61702	4.5		6.35503	20.9237	17.5612	8.63971	11.9448	4.90909
	H4	1.01724	21.8632	13.2174	19.0575	11.1964	4.20325		4.64671	16.1102	9.45794	7.75658	17.2048	7.55056
	H5	0.633094	22.675	8.65	10.7222	9.60169	4.20635		0.689655	15.5568	12.7544	10.9362	16.1986	4.62338
	H6	1.02	23.15	10.3235	20.73	14.2048	4.4322
	H7	0.939227	13.4444	12.2456	11.6029	17.9561	4.48905	11	6.71333	25.6395	17.3061	8.44118	12.1981	6.09016		0.000174159	0.150968	2.25678e-09	0.000223305	0.103472
	H8	0.568345	22.4865	8.40625	6.80899	12.2396	4.58389		0.674528	21.7803	0.125	9.06452	15.9877	5.33974		***	NS	***	***	NS
	H9	0.693548	23.5699	9.54795	13.6575	9.79279	4.7987		5.32558	26.7434	2.54237	8.216	6.69948	10.0687
	H10	0.689655	15.5568	12.7544	10.9362	16.1986	4.62338		10.401	9.8062	22.7664	7.67769	16.6456	5.05769
	H11	2.99291	22.9048	18.039	8.82759	12.4912	4.68571		4	16.287	2.37273	6.9527	12.7237	5.02235
	H12	0.713376	19.6949	11.8286	11.15	9.10236	4.95588		4.9593	32.1875	14.2222	9.47887	12.345	4.11602
									3.92308	19.248	1.34146	9.45139	19.4597	7.21739
									2.99291	22.9048	18.039	8.82759	12.4912	4.68571
								12	8.35099	21.3019	16.175	8.48039	16.9692	6.31818		4.71763e-06	0.072588	0.00035852	0.0011215	0.0275911
									3.3262	19.3441	0	6.62366	13.9193	7.58824		***	NS	***	**	*
									3.07222	26.519	8.74242	12.4444	9.22436	4.70536
									3.89055	13.9286	24.3387	8.55914	28.6901	9.96795
									11.3103	16.525	0.0714286	6.98837	15.6519	5.7482
									2.96842	17.9762	9.04839	7.43056	19.5316	4.81818
									2.31579	20.7791	16.56	8.47475	16.2206	7.39623
									0.713376	19.6949	11.8286	11.15	9.10236	4.95588

## Sheet: Feuil1
	2	8.01899	14.9753	13.1446	10.5556	9.79464	4.04202			8.51747	20.3875	9.97821	8.1417	9.72363	4.12883
		11.2731	22.2841	6.44444	9.19355	11.1026	4.18978			6.49752	19.0719	3.68943	5.46186	7.80971	4.26098
		17.0963	10.2288	7.73109	8.7	15.9146	4.18621			8.79195	15.022	5.59533	5.61639	12.0471	4.27621
		12.9573	14.0503	15.2518	12.2222	7.47222	4.36719			8.35658	15.8445	15.219	8.17138	9.33663	4.3883
		7.64773	13	17.2963	12.5565	10.8512	4.49193			3.99209	16.4491	11.2182	11.6048	8.11275	4.30591
		3.6776	13.75	7.24348	10.3937	0.193548	4.51471			4.36279	14.9204	8.9752	8.68435	8.18609	4.58067
		5.22596	6.19118	9.14407	15.2421	4.1338	4.16667			3.89411	7.85519	8.10053	14.7528	9.64531	4.33702
		3.5528	19.8636	3.01818	6.71951	3.77273	4.17073			2.02188	22.3203	8.49313	10.8599	7.04696	4.27008
	3	7.66316	19.7159	7.15385	11.48	7.46602	4.20536		6	5.77301	30.8495	0	5.96203	12.934	4.4188
		4.24561	15.1333	1.70435	7.2766	5.16981	4.09929			0.827411	23.9265	4.23913	2.075	7.6338	4.47015
		7.11377	14.0252	4.66912	5.57857	14.8692	4.08824			5.37113	17.6829	3.46078	2	13.3818	4.0796
		7.0914	16.5	13.3667	4.82759	7.17391	4.42683			3.65969	12.0734	17.3047	6.28324	12.3436	4.68927
		4.905	13.8769	9	12.963	5.84375	4.5			1.46535	21.8442	10.5728	8.16883	9.2	4.71429
		5.3022	8.22353	8.29808	7.63551	7.34091	4.37984			2.85027	18.9187	12.4574	9.28058	12.8009	4.00694
		3.37374	5.91176	5.55652	16.0811	6.77622	4.2			1.79096	16.5116	13.7113	9.01439	12.9675	5.09028
		2.88439	24.8795	9.08696	6.94048	3.61702	4.5			1.02	23.15	10.3235	20.73	14.2048	4.4322
	4	11.3289	22.6351	11.662	0.5	13.6604	4.16484		7	3.91824	32.908	0.26	11.7432	11.1513	4.65625
		8.125	17.2913	4.28571	2.56	7.94079	4.25185			1.82514	28.1562	0.414414	4.20635	18	4.54438
		5.62617	15.1885	7.30526	3.79675	11.2597	4.42105			4.57789	25.2256	4.69178	2.89474	11.2412	4.44633
		8.40513	12.8655	14.4667	7.6	8.31469	4.29714			7.1976	19.8077	13.3864	7.47967	15.1857	4.44898
		1.19527	17.1127	10.7734	9.25444	7.16779	4.07383			5.27551	27.5049	8.81061	11.9718	13.7698	4.36364
		6.56995	15.7163	6.07874	10.0517	9.18	4.61333			2.85027	18.9187	12.4574	9.28058	12.8009	4.00694
		4.97674	11.6604	8.08247	13.0405	10.369	4.36496			1.79096	16.5116	13.7113	9.01439	12.9675	5.09028
		1.01724	21.8632	13.2174	19.0575	11.1964	4.20325			1.02	23.15	10.3235	20.73	14.2048	4.4322
	5	7.05882	24.2235	7.95238	10.0312	7.97345	4.10309		8	5.78146	39.3804	0.692308	11.8824	13.1429	5.47368
		2.34637	21.5789	2.32323	2.81731	7.02564	4.50299			1.98235	19.8571	2.89209	8.39252	6.0411	4.48322
		5.33158	20.6454	2.67586	4.39024	6.14483	4.40936			2.01705	25.5263	7.92982	6.30405	14.133	5.05348
		4.97248	19.9621	17.7909	8.03571	14.3857	4.46202			2.38389	12.1829	17.7445	7.14545	11.2515	4.95135
		2.22034	21.8067	7.80315	11.6452	8.58824	4.15789			2.17742	14.1753	12.344	6.75641	14.6178	4.63158
		1.90141	21.9917	14.2805	6.65649	16.0299	4.81482			3.0566	19.92	20.3967	7.00658	15.9557	5.01523
		2	7.65741	9.61905	14.6475	17.3022	4.61644			5.92391	20.3663	14.8469	9.38776	22.0065	6.7375
		0.633094	22.675	8.65	10.7222	9.60169	4.20635			0.568345	22.4865	8.40625	6.80899	12.2396	4.58389
	6	5.77301	30.8495	0	5.96203	12.934	4.4188		9	6.74026	31.6575	20.2857	10.1802	18.9937	7.61207
		0.827411	23.9265	4.23913	2.075	7.6338	4.47015			1.33566	24.0102	7.06849	9.53548	10.6724	4.47826
		5.37113	17.6829	3.46078	2	13.3818	4.0796			1.14706	12.6853	2.51562	6.46715	9.35912	4.09877
		3.65969	12.0734	17.3047	6.28324	12.3436	4.68927			6.56962	11.3983	13.4851	9.23622	17.7939	6.91878
		1.46535	21.8442	10.5728	8.16883	9.2	4.71429			1.4424	14.6525	5.44966	7.66923	10.2752	4.26291
		2.85027	18.9187	12.4574	9.28058	12.8009	4.00694			1.02094	16.3114	11.7064	12.9008	18.0909	4.70057
		1.79096	16.5116	13.7113	9.01439	12.9675	5.09028			5.1087	15.7063	15.4286	10.3193	17.2125	5.88387
		1.02	23.15	10.3235	20.73	14.2048	4.4322			0.693548	23.5699	9.54795	13.6575	9.79279	4.7987
	7	3.91824	32.908	0.26	11.7432	11.1513	4.65625		10	7.11111	11.5974	19.5965	8.56944	14.374	5.8042
		1.82514	28.1562	0.414414	4.20635	18	4.54438			4.6776	25.985	9.85263	13.4889	16.3011	4.29834
		4.57789	25.2256	4.69178	2.89474	11.2412	4.44633			2	28.0992	0.492537	5.43357	13.9455	5.84211
		7.1976	19.8077	13.3864	7.47967	15.1857	4.44898			3.97976	11.8868	13.4615	6.54335	6.50785	5.71622
		5.27551	27.5049	8.81061	11.9718	13.7698	4.36364			2.22959	12.1973	8.75789	10.0566	13.0065	4.1087
		2.85027	18.9187	12.4574	9.28058	12.8009	4.00694			6.35503	20.9237	17.5612	8.63971	11.9448	4.90909
		1.79096	16.5116	13.7113	9.01439	12.9675	5.09028			4.64671	16.1102	9.45794	7.75658	17.2048	7.55056
		1.02	23.15	10.3235	20.73	14.2048	4.4322			0.689655	15.5568	12.7544	10.9362	16.1986	4.62338
	8	5.78146	39.3804	0.692308	11.8824	13.1429	5.47368		11	6.71333	25.6395	17.3061	8.44118	12.1981	6.09016
		1.98235	19.8571	2.89209	8.39252	6.0411	4.48322			0.674528	21.7803	0.125	9.06452	15.9877	5.33974
		2.01705	25.5263	7.92982	6.30405	14.133	5.05348			5.32558	26.7434	2.54237	8.216	6.69948	10.0687
		2.38389	12.1829	17.7445	7.14545	11.2515	4.95135			10.401	9.8062	22.7664	7.67769	16.6456	5.05769
		2.17742	14.1753	12.344	6.75641	14.6178	4.63158			4	16.287	2.37273	6.9527	12.7237	5.02235
		3.0566	19.92	20.3967	7.00658	15.9557	5.01523			4.9593	32.1875	14.2222	9.47887	12.345	4.11602
		5.92391	20.3663	14.8469	9.38776	22.0065	6.7375			3.92308	19.248	1.34146	9.45139	19.4597	7.21739
		0.568345	22.4865	8.40625	6.80899	12.2396	4.58389			2.99291	22.9048	18.039	8.82759	12.4912	4.68571
	9	6.74026	31.6575	20.2857	10.1802	18.9937	7.61207
		1.33566	24.0102	7.06849	9.53548	10.6724	4.47826
		1.14706	12.6853	2.51562	6.46715	9.35912	4.09877
		6.56962	11.3983	13.4851	9.23622	17.7939	6.91878
		1.4424	14.6525	5.44966	7.66923	10.2752	4.26291
		1.02094	16.3114	11.7064	12.9008	18.0909	4.70057
		5.1087	15.7063	15.4286	10.3193	17.2125	5.88387
		0.693548	23.5699	9.54795	13.6575	9.79279	4.7987
	10	7.11111	11.5974	19.5965	8.56944	14.374	5.8042
		4.6776	25.985	9.85263	13.4889	16.3011	4.29834
		2	28.0992	0.492537	5.43357	13.9455	5.84211
		3.97976	11.8868	13.4615	6.54335	6.50785	5.71622
		2.22959	12.1973	8.75789	10.0566	13.0065	4.1087
		6.35503	20.9237	17.5612	8.63971	11.9448	4.90909
		4.64671	16.1102	9.45794	7.75658	17.2048	7.55056
		0.689655	15.5568	12.7544	10.9362	16.1986	4.62338
	11	6.71333	25.6395	17.3061	8.44118	12.1981	6.09016
		0.674528	21.7803	0.125	9.06452	15.9877	5.33974
		5.32558	26.7434	2.54237	8.216	6.69948	10.0687
		10.401	9.8062	22.7664	7.67769	16.6456	5.05769
		4	16.287	2.37273	6.9527	12.7237	5.02235
		4.9593	32.1875	14.2222	9.47887	12.345	4.11602
		3.92308	19.248	1.34146	9.45139	19.4597	7.21739
		2.99291	22.9048	18.039	8.82759	12.4912	4.68571
