# Supplementary material for: The out-of-field dose in radiation therapy induces delayed tumorigenesis by senescence evasion
Source: eLife. 2022 Mar 18;11:e67190. doi: 10.7554/eLife.67190 (PMC8933005; doi:10.7554/eLife.67190)
Supplement: Figure 3—source data 2. [file elife-67190-fig3-data2.xlsx]

## Sheet: Feuil7
Figure 3-source data 2
		0.268245	0.0802712		5.44452	1.1082		2.82915	0.520195		1.61328	0.0967244		0.468583	0.0754753		0.245631	0.107381
		0.343342	0.0865593		6.51578	0.985435		4.10784	0.744959		1.72377	0.210005		0.671849	0.153181		0.435347	0.159348
		0.333288	0.079468		5.69894	0.758882		4.28094	0.434902		1.64526	0.19453		0.69308	0.126105		0.445221	0.119555
		0.363782	0.0440779		6.35697	0.712381		4.83455	0.419719		1.28011	0.181184		0.768555	0.0901944		0.503428	0.0905226
		0.421527	0.040813		5.66152	0.695126	0.787956	2.61537	0.28596	0.471385	1.54717	0.179689	0.191352	0.644055	0.130301	0.124946	0.407617	0.0937861	0.115803
		0.396234	0.0859996		2.00308	0.17354	0.17354	1.12287	0.098172	0.098172	0.638871	0.0588221	0.0588221	0.42294	0.083799	0.083799	0.296575	0.0737499	0.0737499
		0.387433	0.0968361		1.32051	0.224494	0.224494	0.989281	0.19183	0.19183	0.533011	0.0545114	0.0545114	0.422641	0.0751609	0.0751609	0.337748	0.0531346	0.0531346
		0.427914	0.0798085		1.03017	0.164655	0.164655	0.913319	0.0872437	0.0872437	0.494536	0.0988571	0.0988571	0.451277	0.108942	0.108942	0.296016	0.0677561	0.0677561
		0.347803	0.0933262		0.799473	0.154548	0.154548	0.833891	0.0869656	0.0869656	0.464517	0.0502445	0.0502445	0.43684	0.0975749	0.0975749	0.323132	0.1094	0.1094
		0.332796	0.058479		0.779521	0.101671	0.101671	0.753299	0.0851341	0.0851341	0.494425	0.120251	0.120251	0.374481	0.0788006	0.0788006	0.247738	0.0880746	0.0880746
		0.302831	0.0185021		0.748741	0.167516	0.167516	0.656569	0.140206	0.140206	0.394797	0.0738429	0.0738429	0.363315	0.0359655	0.0359655	0.269631	0.0859641	0.0859641		/	control		0
		0.194747	0.087472		0.571663	0.074168		0.495163	0.109137		0.395542	0.130638		0.360087	0.0931721		0.28967	0.061622				In the Field	-54	100
			0.0709678																				-45	100
																							-36	100
																							-27	100
		0.343329							0.343329														-18	100
			6.51578	4.10784	1.72377	0.671849	0.435347			6.0583	3.95968	1.54908	0.694385	0.447903									-9	100
			5.69894	4.28094	1.64526	0.69308	0.445221			2.00308	1.12287	0.638871	0.42294	0.296575								border at the field	0	50
			6.35697	4.83455	1.28011	0.768555	0.503428			1.32051	0.989281	0.533011	0.422641	0.337748									9	20
			5.66152	2.61537	1.54717	0.644055	0.407617			1.03017	0.913319	0.494536	0.451277	0.296016									18	10
			2.00308	1.12287	0.638871	0.42294	0.296575			0.799473	0.833891	0.464517	0.43684	0.323132									27	8
			1.32051	0.989281	0.533011	0.422641	0.337748			0.779521	0.753299	0.494425	0.374481	0.247738									36	< 5
			1.03017	0.913319	0.494536	0.451277	0.296016			0.748741	0.656569	0.394797	0.363315	0.269631									45	< 5
			0.799473	0.833891	0.464517	0.43684	0.323132															area	distance (mm)	dose (%)
			0.779521	0.753299	0.494425	0.374481	0.247738
			0.748741	0.656569	0.394797	0.363315	0.269631
																					/	control		0
																						In the Field	-45	100
																							-36	100
			0.0802712	1.1082	0.520195	0.0967244	0.0754753	0.107381		/	Non-irradiated			Non-irradiated									-27	100
										PTV	-12 to -4		PTV										-18	100
			0.0865593	0.985435	0.744959	0.210005	0.153181	0.159348		Margin	-4 to 4		Margin (distance in mm)	-4 to 4									-9	100
			0.079468	0.758882	0.434902	0.19453	0.126105	0.119555			5 to 13			5 to 13								border at the field	0	50
			0.0440779	0.712381	0.419719	0.181184	0.0901944	0.0905226			14 to 22			14 to 22									9	20
			0.040813	0.695126	0.28596	0.179689	0.130301	0.0937861			23 to 31			23 to 31									18	10
			0.0859996	0.17354	0.098172	0.0588221	0.083799	0.0737499			32 to 40			32 to 40									27	8
			0.0968361	0.224494	0.19183	0.0545114	0.0751609	0.0531346			41 to 49			41 to 49									36	< 5
			0.0798085	0.164655	0.0872437	0.0988571	0.108942	0.0677561		/	distance (mm)			distance (mm)								area	distance (mm)	dose (%)
			0.0933262	0.154548	0.0869656	0.0502445	0.0975749	0.1094
			0.058479	0.101671	0.0851341	0.120251	0.0788006	0.0880746													/	control		0
			0.0185021	0.167516	0.140206	0.0738429	0.0359655	0.0859641														In the Field	-45	100
			0.087472	0.074168	0.109137	0.130638	0.0931721	0.061622															-36	100
																							-27	100
																							-18	100
			0.0709678																			border at the field	0	50
																							9	20
53bp1		0	120	240	480	1440	2880		0	2	4	8	24	48									18	10
		0.343329	6.51578	4.10784	1.72377	0.671849	0.435347																27	8
		0.0709678	0.985435	0.744959	0.210005	0.153181	0.159348																36	< 5
																							45	< 5
		0	20	240	480	1440	2880															area	distance (mm)	dose (%)
		4.61627	19.0235	9.54698	8.90006	11.8178	5.32
		2.12644	4.37436	4.74321	2.48837	2.99962	1.47
		0	120	240	480	1440	2880
		0.343329	6.51578	4.10784	1.72377	0.671849	0.435347
		0	20	240	480	1440	2880
		4.61627	19.0235	9.54698	8.90006	11.8178	5.32
		7.27875e-08	6.96636e-08	6.45177e-12	0.000216075	0.162359
		***	***	***	***	NS
		1.74722e-07	1.70487e-08	0.000113885	0.621884	0.0683735
		***	***	***	NS	NS
		7.77604e-05	2.54462e-06	0.00665355	0.71507	0.0475393
		***	***	**	NS	*
		1.3132e-05	3.06074e-06	0.26861	0.692294	0.0146967
		***	***	NS	NS	*
		0.000309574	2.00265e-06	0.0282032	0.137263	0.687454
		***	***	*	NS	NS
		1.61688e-06	4.77069e-06	0.0221723	0.382086	0.0824422
		***	***	*	NS	NS
		0.000770708	0.000810706	0.0255012	0.0166306	0.390086
		***	***	*	*	NS

## Sheet: Feuil9
		ctr	20	240	480	1440	3000
	A1	0.289157	4.67241	3.17442	1.66	0.222222	0.0987654	1	0.289157	4.67241	3.17442	1.66	0.222222	0.0987654		1.14288e-05	1.18241e-05	4.3095e-11	0.00260573	0.734105
	A2	0.221557	5.04	3.60811	1.4898	0.381579	0.195402		0.236364	5.09524	2.6506	1.29688	0.566667	0.276596		***	***	***	**	NS
	A3	0.22963	4.35211	3.35294	1.99074	0.373913	0.181818		0.182432	3.65556	3.40404	1.61062	0.563025	0.234234
	A4	0.371429	6.6	3.98901	1.34043	0.617647	0.341772		0.240506	5.64815	1.42857	1.54545	0.52439	0.275229
	A5	0.487179	4.97561	2.17333	1.33	0.233871	0.203008		0.389706	6.33333	2.73874	1.64103	0.47619	0.47561
	A6	0.290541	1.32787	1.13514	0.774648	0.203125	0.113208		0.426966	6.97938	3.51261	1.80808	0.513043	0.384615
	A7	0.375	0.969697	0.952381	0.510067	0.307143	0.303279		0.288235	7.25	3.30631	1.61386	0.470085	0.22
	A8	0.328859	0.793651	0.6	0.612069	0.29661	0.194444		0.0925926	3.92208	2.41791	1.73034	0.413043	0
	A9	0.322981	0.805556	0.89	0.484127	0.275362	0.144144
	A10	0.251656	0.662651	0.597826	0.257812	0.168831	0.116071	2	0.221557	5.04	3.60811	1.4898	0.381579	0.195402		0.327449	5.24193	3.28085	1.53774	0.401753	0.2305		7.27875e-08	6.96636e-08	6.45177e-12	0.000216075	0.162359
	A11	0.317073	0.461538	0.588235	0.267241	0.373913	0.205607		0.417808	7.33594	4.97778	2.06803	0.782258	0.229167		0.399542	5.79189	4.61013	1.68199	0.738067	0.343275		***	***	***	***	NS
	A12	0.228188	0.567568	0.49	0.311321	0.169231	0.242105		0.406417	5.70073	4.29286	1.44785	0.823129	0.620438		0.403028	5.74795	4.07265	1.57594	0.796651	0.514968
	B1	0.236364	5.09524	2.6506	1.29688	0.566667	0.276596		0.299107	7.5	5.60909	2.07692	0.913043	0.539568		0.322414	5.9353	4.56333	1.607	0.788814	0.500239
	B2	0.417808	7.33594	4.97778	2.06803	0.782258	0.229167		0.324176	6.87097	4.53147	1.8011	0.78169	0.753425		0.345015	6.1146	3.87945	1.54306	0.844234	0.701931
	B3	0.30102	4.37647	5.45588	1.97279	0.647059	0.395522		0.448454	7.0084	3.8629	1.6748	0.614754	0.423611		0.394015	6.63912	3.95341	1.5526	0.673215	0.479091
	B4	0.360215	5.46218	4.67626	0.945205	0.831169	0.360656		0.446927	7.80531	3.60909	1.44262	0.604651	0.465347		0.457016	7.49039	3.76946	1.33048	0.75057	0.466325
	B5	0.519126	5.99296	3.33058	1.74194	0.691781	0.387755		0.182292	4.86486	2.37143	1.78906	0.473684	0.255814		0.2754	5.50526	3.54814	1.56382	0.561775	0.346897
	B6	0.43956	2.10476	1.37313	0.659864	0.352273	0.443396
	B7	0.299465	1.17431	1.3625	0.536913	0.477612	0.419355	3	0.22963	4.35211	3.35294	1.99074	0.373913	0.181818
	B8	0.317949	1.08989	1.08219	0.386667	0.578652	0.246667		0.30102	4.37647	5.45588	1.97279	0.647059	0.395522
	B9	0.240741	1.02128	0.823009	0.383459	0.546667	0.133803		0.361386	6.50413	4.80556	1.27397	0.797297	0.526316
	B10	0.297143	0.865979	0.725806	0.335526	0.47619	0.130435		0.273292	5.4031	4.19298	1.65359	0.831081	0.489933
	B11	0.254902	0.851852	0.976923	0.425806	0.251497	0.1875		0.399015	5.87681	4.12745	1.51613	0.856115	0.742857
	B12	0.198895	0.65	0.692308	0.289855	0.41791	0.253731		0.390625	5.62857	4.26316	1.74026	0.726708	0.5
	C1	0.182432	3.65556	3.40404	1.61062	0.563025	0.234234		0.5	7.43704	3.72857	1.36757	0.758621	0.401515
	C2	0.406417	5.70073	4.29286	1.44785	0.823129	0.620438		0.21134	6.01333	4.32099	1.64706	0.553846	0.32381
	C3	0.361386	6.50413	4.80556	1.27397	0.797297	0.526316
	C4	0.423256	5.56364	4.56716	1.77344	0.941176	0.463415	4	0.371429	6.6	3.98901	1.34043	0.617647	0.341772
	C5	0.421053	5.2233	2.625	1.80851	0.625	0.449704		0.360215	5.46218	4.67626	0.945205	0.831169	0.360656
	C6	0.462428	2.07483	1.24823	0.618644	0.380435	0.339744		0.423256	5.56364	4.56716	1.77344	0.941176	0.463415
	C7	0.520231	1.58559	1.25424	0.438596	0.35468	0.414013		0.326633	6.17143	5.42446	1.37234	0.785235	0.496454
	C8	0.367647	1.32456	0.981366	0.607143	0.313609	0.211765		0.27027	5.59524	4.4269	1.27723	0.73913	0.766667
	C9	0.441989	0.357143	0.896	0.379121	0.261364	0.39881		0.346939	7.73282	5.25185	1.01613	0.75	0.492754
	C10	0.307292	0.891566	1.01274	0.464286	0.272222	0.317073		0.472973	7.58763	5.11724	1.15714	0.877419	0.554688
	C11	0.298701	0.551181	0.755102	0.308725	0.363095	0.216561		0.338542	6.14286	5.22353	1.35897	0.606667	0.55102
	C12	0.0714286	0.311688	0.647541	0.233871	0.350575	0.342105
	D1	0.240506	5.64815	1.42857	1.54545	0.52439	0.275229	5	0.487179	4.97561	2.17333	1.33	0.233871	0.203008
	D2	0.299107	7.5	5.60909	2.07692	0.913043	0.539568		0.519126	5.99296	3.33058	1.74194	0.691781	0.387755
	D3	0.273292	5.4031	4.19298	1.65359	0.831081	0.489933		0.421053	5.2233	2.625	1.80851	0.625	0.449704
	D4	0.326633	6.17143	5.42446	1.37234	0.785235	0.496454		0.390625	4.66667	3.02679	1.32515	0.625899	0.475
	D5	0.390625	4.66667	3.02679	1.32515	0.625899	0.475		0.386598	6.11538	2.432	1.57778	1	0.544776
	D6	0.291005	2.24786	1.07692	0.585366	0.548571	0.385246		0.390041	6.18667	2.43571	1.77922	0.601399	0.5
	D7	0.222772	1.16429	1.11842	0.487342	0.480263	0.287356		0.408163	7.13158	2.62295	1.35461	0.761589	0.44375
	D8	0.390625	0.803419	0.992701	0.27451	0.40884	0.401639		0.369427	5	2.2766	1.46018	0.612903	0.256944
	D9	0.193548	0.969925	0.811321	0.488095	0.52809	0.40411
	D10	0.273973	0.602564	0.75	0.465409	0.425926	0.246988	6	0.290541	1.32787	1.13514	0.774648	0.203125	0.113208		1.74722e-07	1.70487e-08	0.000113885	0.621884	0.0683735
	D11	0.297619	0.770833	0.644928	0.342466	0.432258	0.418301		0.43956	2.10476	1.37313	0.659864	0.352273	0.443396		***	***	***	NS	NS
	D12	0.423313	0.539062	0.407407	0.416667	0.350649	0.330645		0.462428	2.07483	1.24823	0.618644	0.380435	0.339744
	E1	0.389706	6.33333	2.73874	1.64103	0.47619	0.47561		0.291005	2.24786	1.07692	0.585366	0.548571	0.385246
	E2	0.324176	6.87097	4.53147	1.8011	0.78169	0.753425		0.263158	2.2197	0.944444	0.56051	0.485	0.298013
	E3	0.399015	5.87681	4.12745	1.51613	0.856115	0.742857		0.479532	1.98413	1.04294	0.638158	0.511905	0.311475
	E4	0.27027	5.59524	4.4269	1.27723	0.73913	0.766667		0.527919	2.03846	1.12766	0.556391	0.420732	0.226415
	E5	0.386598	6.11538	2.432	1.57778	1	0.544776		0.41573	2.02703	1.03448	0.717391	0.481481	0.255102
	E6	0.263158	2.2197	0.944444	0.56051	0.485	0.298013
	E7	0.415459	1.67213	0.741379	0.657718	0.36	0.229299	7	0.375	0.969697	0.952381	0.510067	0.307143	0.303279		7.77604e-05	2.54462e-06	0.00665355	0.71507	0.0475393
	E8	0.438424	0.974359	0.929078	0.528662	0.350282	0.320988		0.299465	1.17431	1.3625	0.536913	0.477612	0.419355		***	***	**	NS	*
	E9	0.260638	0.84127	0.904348	0.473684	0.481481	0.36646		0.520231	1.58559	1.25424	0.438596	0.35468	0.414013
	E10	0.485714	0.932584	0.639344	0.676136	0.432749	0.327778		0.222772	1.16429	1.11842	0.487342	0.480263	0.287356
	E11	0.286458	0.584906	0.478261	0.475	0.39267	0.331461		0.415459	1.67213	0.741379	0.657718	0.36	0.229299
	E12	0.103704	0.615385	0.516129	0.761538	0.522843	0.274336		0.479532	1.98413	1.04294	0.638158	0.511905	0.311475
	F1	0.426966	6.97938	3.51261	1.80808	0.513043	0.384615		0.527919	2.03846	1.12766	0.556391	0.420732	0.226415
	F2	0.448454	7.0084	3.8629	1.6748	0.614754	0.423611		0.41573	2.02703	1.03448	0.717391	0.481481	0.255102
	F3	0.390625	5.62857	4.26316	1.74026	0.726708	0.5
	F4	0.346939	7.73282	5.25185	1.01613	0.75	0.492754	8	0.328859	0.793651	0.6	0.612069	0.29661	0.194444		1.3132e-05	3.06074e-06	0.26861	0.692294	0.0146967
	F5	0.390041	6.18667	2.43571	1.77922	0.601399	0.5		0.317949	1.08989	1.08219	0.386667	0.578652	0.246667		***	***	NS	NS	*
	F6	0.479532	1.98413	1.04294	0.638158	0.511905	0.311475		0.367647	1.32456	0.981366	0.607143	0.313609	0.211765
	F7	0.519337	1.40714	0.809524	0.515957	0.533333	0.318519		0.390625	0.803419	0.992701	0.27451	0.40884	0.401639
	F8	0.631841	1.11029	0.912	0.625698	0.573034	0.377622		0.438424	0.974359	0.929078	0.528662	0.350282	0.320988
	F9	0.401961	0.740157	0.88	0.44586	0.526596	0.467213		0.631841	1.11029	0.912	0.625698	0.573034	0.377622
	F10	0.3	0.666667	0.834395	0.639706	0.386076	0.350575		0.53271	1.25455	0.878981	0.46	0.589189	0.354839
	F11	0.312169	0.727273	0.798507	0.546218	0.386598	0.339286		0.415254	0.890625	0.930233	0.461538	0.5	0.260163
	F12	0.142857	0.583333	0.561224	0.382353	0.28877	0.442748
	G1	0.288235	7.25	3.30631	1.61386	0.470085	0.22	9	0.322981	0.805556	0.89	0.484127	0.275362	0.144144		0.000309574	2.00265e-06	0.0282032	0.137263	0.687454
	G2	0.446927	7.80531	3.60909	1.44262	0.604651	0.465347		0.240741	1.02128	0.823009	0.383459	0.546667	0.133803		***	***	*	NS	NS
	G3	0.5	7.43704	3.72857	1.36757	0.758621	0.401515		0.441989	0.357143	0.896	0.379121	0.261364	0.39881
	G4	0.472973	7.58763	5.11724	1.15714	0.877419	0.554688		0.193548	0.969925	0.811321	0.488095	0.52809	0.40411
	G5	0.408163	7.13158	2.62295	1.35461	0.761589	0.44375		0.260638	0.84127	0.904348	0.473684	0.481481	0.36646
	G6	0.527919	2.03846	1.12766	0.556391	0.420732	0.226415		0.401961	0.740157	0.88	0.44586	0.526596	0.467213
	G7	0.482051	1.51515	0.918519	0.622449	0.368098	0.378049		0.410891	0.977528	0.94697	0.613139	0.383495	0.416667
	G8	0.53271	1.25455	0.878981	0.46	0.589189	0.354839		0.509677	0.682927	0.519481	0.448649	0.491667	0.253846
	G9	0.410891	0.977528	0.94697	0.613139	0.383495	0.416667
	G10	0.397906	0.829545	0.731343	0.468085	0.466667	0.347826	10	0.251656	0.662651	0.597826	0.257812	0.168831	0.116071		1.61688e-06	4.77069e-06	0.0221723	0.382086	0.0824422
	G11	0.353261	1.17442	0.591549	0.365385	0.331492	0.333333		0.297143	0.865979	0.725806	0.335526	0.47619	0.130435		***	***	*	NS	NS
	G12	0.278481	0.710526	0.408602	0.530973	0.512195	0.275168		0.307292	0.891566	1.01274	0.464286	0.272222	0.317073
	H1	0.0925926	3.92208	2.41791	1.73034	0.413043	0		0.273973	0.602564	0.75	0.465409	0.425926	0.246988
	H2	0.182292	4.86486	2.37143	1.78906	0.473684	0.255814		0.485714	0.932584	0.639344	0.676136	0.432749	0.327778
	H3	0.21134	6.01333	4.32099	1.64706	0.553846	0.32381		0.3	0.666667	0.834395	0.639706	0.386076	0.350575
	H4	0.338542	6.14286	5.22353	1.35897	0.606667	0.55102		0.397906	0.829545	0.731343	0.468085	0.466667	0.347826
	H5	0.369427	5	2.2766	1.46018	0.612903	0.256944		0.348684	0.784615	0.73494	0.648438	0.367188	0.145161
	H6	0.41573	2.02703	1.03448	0.717391	0.481481	0.255102
	H7	0.265152	1.07576	0.757282	0.49505	0.5	0.352113	11	0.317073	0.461538	0.588235	0.267241	0.373913	0.205607		0.000770708	0.000810706	0.0255012	0.0166306	0.390086
	H8	0.415254	0.890625	0.930233	0.461538	0.5	0.260163		0.254902	0.851852	0.976923	0.425806	0.251497	0.1875		***	***	*	*	NS
	H9	0.509677	0.682927	0.519481	0.448649	0.491667	0.253846		0.298701	0.551181	0.755102	0.308725	0.363095	0.216561
	H10	0.348684	0.784615	0.73494	0.648438	0.367188	0.145161		0.297619	0.770833	0.644928	0.342466	0.432258	0.418301
	H11	0.302469	0.867925	0.419048	0.427536	0.375	0.125		0.286458	0.584906	0.478261	0.475	0.39267	0.331461
	H12	0.111111	0.595745	0.238095	0.237762	0.268519	0.156522		0.312169	0.727273	0.798507	0.546218	0.386598	0.339286
									0.353261	1.17442	0.591549	0.365385	0.331492	0.333333
									0.302469	0.867925	0.419048	0.427536	0.375	0.125
								12	0.228188	0.567568	0.49	0.311321	0.169231	0.242105		1.48484e-05	0.000492542	0.020253	0.0144781	0.0834548
									0.198895	0.65	0.692308	0.289855	0.41791	0.253731		***	***	*	*	NS
									0.0714286	0.311688	0.647541	0.233871	0.350575	0.342105
									0.423313	0.539062	0.407407	0.416667	0.350649	0.330645
									0.103704	0.615385	0.516129	0.761538	0.522843	0.274336
									0.142857	0.583333	0.561224	0.382353	0.28877	0.442748
									0.278481	0.710526	0.408602	0.530973	0.512195	0.275168
									0.111111	0.595745	0.238095	0.237762	0.268519	0.156522
