# Supplementary material for: The out-of-field dose in radiation therapy induces delayed tumorigenesis by senescence evasion
Source: eLife. 2022 Mar 18;11:e67190. doi: 10.7554/eLife.67190 (PMC8933005; doi:10.7554/eLife.67190)
Supplement: Figure 3—source data 4. [file elife-67190-fig3-data4.xlsx]

## Sheet: Feuil1
Figure 3-source data 4
Non-irradiated	PTV	-5 to +20	+22 to +47
0	0	0.298454	0
0	0	0.645652	0
0	88.412	5.39639	0
0	91.0048	30.2203	0
0	92.9325	34.1133	0
0	93.7171	47.101	46.8127
0	95.8841	47.2883	48.75
0	96.0771	49.1471	51.3013
0	96.323	50.7773	53.3281
0	96.3292	51.1364	55.685
0	101.565	51.9499	56.5437
0	102.028	55.1979	57.4224
0	102.509	55.41	57.4444
0	103.364	56.2711	60.7102
0	104.654	57.3418	60.8737
0	105.258	61.7634	62.2045
0	107.268	63.7203	64.7268
0	110.183	63.8791	64.9815
0	110.391	64.6311	65.6359
0	113.236	68.2331	66.1866
0	116.368	68.6405	67.1468
61.2669	116.636	70.0591	68.7089
65.7501	120.966	70.9176	69.8799
67.6153	127.821	73.8424	70.4987
68.6673	129.099	76.6675	72.2051
69.4345	130.626	76.8558	73.7295
69.6399	132.431	76.894	73.8567
71.7821	133.208	77.7736	74.4527
75.4504	136.056	78.8383	74.8471
80.2652	136.767	82.8145	76.4948
80.6369	136.825	83.8245	76.9448
81.5308	141.816	85.3995	78.6758
91.832	142.924	87.6173	78.9877
99.7353	143.305	87.749	80.0133
109.58	143.506	89.281	80.1672
	146.611	89.6927	81.8264
	147.879	91.756	84.9855
	149.309	93.9054	88.0522
	151.088	95.9908	91.1665
	179.817	101.128	91.6202
		102.443	91.8758
		104.197	103.94
		108.679	104.64
		111.461	119.524
			120.815
