# Supplementary material for: The out-of-field dose in radiation therapy induces delayed tumorigenesis by senescence evasion
Source: eLife. 2022 Mar 18;11:e67190. doi: 10.7554/eLife.67190 (PMC8933005; doi:10.7554/eLife.67190)
Supplement: Figure 3—source data 5. [file elife-67190-fig3-data5.xlsx]

## Sheet: Feuil1
Figure 3-source data 5
	Non-irradiated	PTV	-5 to +20	+22 to +47
	0	0	0	0
	0	0	0	0
	0	0	0	0
	0	0	0	0
	0	0	0	0
	0	0	0	0
	0	0	0	0
	0	0	0	0
	0	0	0	0
	0	0	0	0
	0	0	0	0
	0	0	0	0
	0	0	0	0
	0	0	0	0
	0	0	0	0
	0	0	0	0
	0	0	0	0
	0	0	0	0
	0	0	0	0
	0	0	0	0
	0	0	0	0
	0	0	0	0
	0	0	0	0
	0	0	0	0
	0	0	0	0
	0	0	0	0
	0	0	0	0
	0	0	0	0
	0	0	0	0
	0	0	0	0
	0	0	0	0
	0	0	0	0
	0	0	0	0
	0	0	0	0
	0	0	0	0
	0	0	0	0
	0	0	0	0
	0	0	0	0
	0	0	0	0
	0	0	0	0
	0	0	0	0
	0	0	0	0
	0	0	0	0
	0	0	0	0
	0	0	0	0
	0	0	0	0
	0	0	0	0
	0	0	0	0
	0	0	0	0
	0	0	0	0
	0	0	0	0
	0	0	0	0
	0	0	0	0
	0	0	0	0
	0	0	0	0
	0	0	0	0
	0	0	0	0
	0	0	0	0
	0	0	0	0
	0	0	0	0
	2.47846	0	0	0
	2.57974	0	0	0
	3.91285	1.14185	0	0
	3.91609	1.15673	0	0
	4.24191	1.23043	0	0
	4.28323	1.25796	0	0
	4.37552	1.26179	0	0
	4.76827	1.27209	0	0
	4.86838	1.27309	0	0
	6.40013	1.28063	0	0
	6.45121	1.28723	0	0
	6.68174	1.30046	0	0
	6.69545	1.39576	0	0
	7.4569	1.4519	0	0
	7.55539	1.46176	0	0
	8.09358	1.60843	0	0
	8.22593	1.62186	0	0
	9.94772	1.63031	1.03018	0
	11.0112	1.79581	1.13158	0
	13.7723	1.81954	1.19244	0
	15.3308	1.83037	1.36222	0
	19.0832	1.92014	1.41134	0
	32.6183	1.96188	1.48404	0
		2.00148	1.48808	0
		2.0112	1.51468	0
		6.58325	7.96578	2.0636
		7.12216	10.2844	2.09375
		7.16993	11.104	2.17273
		8.11166	12.2382	2.18033
		8.13954	12.3524	2.19501
		9.19389	12.9642	2.24637
		9.56944	14.2055	2.32015
		9.65272	14.6124	2.36766
		10.2037	16.8787	2.63875
		10.2659	18.3737	2.74708
		10.7612	22.4272	2.80084
		11.0028	29.0175	2.80375
		11.2419	31.5267	2.92374
		11.645	69.2298	3.40882
		11.7016		3.6026
		12.6995		3.71906
		13.0398		3.7527
		14.2182		3.88369
		15.5384		3.89657
		15.8341		4.20366
		16.0137		4.24055
		16.2696		4.35391
		16.4925		4.4719
		17.3793		4.66325
		18.0857		4.85261
		18.2262		4.85383
		18.3084		4.87993
		18.405		4.89238
		19.8964		5.15842
		20.8469		5.44114
		22.0632		5.61717
		23.6524		6.35457
		23.8797		6.54584
		38.173		10.0427
		39.5734		10.6557
		47.4785		10.7849
		58.9285		11.8577
		59.7609		12.793
		61.074		17.0912
		69.5101		20.6313
		71.8948		26.3861
				27.6668
				31.8886
				39.2936
				47.9858
				61.0109
