# Supplementary material for: The out-of-field dose in radiation therapy induces delayed tumorigenesis by senescence evasion
Source: eLife. 2022 Mar 18;11:e67190. doi: 10.7554/eLife.67190 (PMC8933005; doi:10.7554/eLife.67190)
Supplement: Figure 4—figure supplement 1—source data 1. [file elife-67190-fig4-figsupp1-data1.xlsx]

## Sheet: bilan donnée area
Figure 4 - Figure supplement 1 - source data 1
Non-irradiated	Total body	0 to +10	+10 to +20
0	1	0	1			Non-irradiated	Total body	0 to +10	+10 to +20
0	0	0	0		Moyenne	3.52907	15.7042	8.47409	22.6062
7	4	0	3		SD	14.681	44.678	28.5851	53.8583
0	65	0	0		t test		2.70938e-13	7.05681e-08	2.39036e-31
0	0	0	24
0	5	0	0
1	0	0	14
0	0	0	0
0	0	0	16
0	8	0	0
0	8	3	0
0	0	0	62
0	0	0	108
0	0	0	28
0	0	0	7
0	10	0	22
12	0	0	0
1	1	12	3
28	2	0	6
0	0	0	0
0	1	0	11
0	0	0	54
0	0	0	0
79	41	0	108
0	0	0	280
0	0	0	24
0	17	0	2
0	0	0	13
0	1	0	0
0	0	0	39
0	1	0	66
0	53	6	0
0	1	0	60
0	0	0	0
0	12	0	7
0	11	0	42
0	36	1	5
20	0	0	0
2	2	0	0
0	0	0	5
18	6	0	0
0	0	0	12
3	0	0	92
1	0	0	118
1	1	0	0
2	1	24	52
138	14	0	6
1	1	0	2
0	2	0	1
0	20	0	3
8	0	2	59
188	0	9	35
1	3	0	0
0	1	0	1
3	0	0	1
0	5	0	0
0	5	0	0
0	31	0	1
8	17	0	0
12	0	0	0
2	22	0	23
0	41	0	74
3	0	0	0
84	0	0	2
18	39	0	0
33	2	12	78
2	0	0	0
13	6	0	0
26	0	0	32
55	2	0	0
4	1	0	0
0	0	0	0
7	0	0	0
0	5	0	0
7	7	0	0
5	3	0	6
0	1	0	5
1	6	0	21
0	0	0	47
0	8	0	0
1	1	0	0
0	1	0	7
11	16	0	11
0	1	0	34
40	17	0	0
0	0	0	9
0	6	0	76
0	0	0	0
0	0	0	15
0	1	0	40
0	97	0	6
0	0	0	12
17	24	0	60
1	4	0	75
0	51	0	53
0	7	0	0
0	0	0	0
1	10	0	3
0	5	0	10
0	0	0	3
0	19	0	17
0	31	0	0
0	2	3	0
0	17	1	4
1	3	0	53
0	11	0	0
2	2	11	0
1	2	0	37
0	33	4	86
1	0	0	10
0	0	0	14
0	9	0	170
1	0	0	23
0	4	0	53
2	0	2	0
2	6	0	0
0	0	1	0
0	0	0	1
0	0	0	0
0	0	0	0
2	2	1	0
0	19	1	0
22	0	0	25
0	1	1	0
2	0	1	43
0	0	0	0
0	0	2	3
0	5	0	0
41	0	0	0
0	0	0	6
0	29	0	0
0	0	0	0
0	0	238	0
0	0	0	2
0	0	0	0
0	2	0	0
17	0	0	0
0	0	0	0
1	0	25	0
0	0	0	0
0	1	0	0
0	0	0	8
1	0	1	15
0	41	0	2
0	0	0	348
0	34	1	0
0	0	0	0
0	38	1	0
0	1	0	19
0	8	0	79
0	1	0	0
0	8	11	25
0	25	0	2
0	0	0	10
0	21	0	0
0	7	0	76
0	1	1	21
0	2	0	0
1	1	1	11
1	0	9	0
12	1	0	0
0	4	0	0
0	1	0	0
14	10	0	0
0	1	1	0
0	0	1	0
0	0	52	37
0	9	0	8
0	71	0	47
0	0	1	20
30	0	0	0
24	0	19	0
0	0	24	0
0	0	0	0
0	0	15	0
2	0	1	16
0	0	23	2
0	0	0	0
1	0	1	50
0	1	0	49
0	6	28	28
0	1	6	40
0	11	0	42
0	114	2	27
0	0	3	23
0	2	3	49
11	6	139	66
1	0	3	24
4	5	0	0
3	25	0	0
0	0	3	0
2	0	1	1
1	11	6	1
1	0	3	8
0	2	2	0
0	24	23	22
0	0	16	0
0	1	0	1
0	2	1	0
0	1	12	40
0	3	1	1
0	0	0	0
0	0	4	0
0	0	31	115
7	0	5	61
0	0	0	43
0	5	10	0
0	0	0	23
0	0	6	0
0	0	4	0
0	0	1	0
0	0	0	41
0	0	1	4
0	0	23	0
0	0	0	10
0	0	356	0
0	23	2	47
0	9	84	5
0	0	1	98
0	0	0	0
1	1	0	0
0	0	0	0
0	0	0	30
0	0	0	0
0	6	0	15
5	1	0	10
0	0	0	1
0	0	0	3
0	0	0	3
0	0	0	1
0	0	0	0
0	2	0	3
0	79	0	0
1	0	0	2
0	0	0	30
0	0	0	78
0	1	0	17
0	5	0	0
0	1	0	90
0	0	0	7
0	3	0	0
0	5	0	2
0	6	1	49
0	0	0	0
0	2	0	0
0	4	0	55
0	0	0	0
0	1	0	0
2	0	0	0
0	1	0	0
0	4	0	7
1	27	0	1
0	2	0	0
0	0	0	0
0	4	0	6
0	0	0	0
0	0	0	0
0	0	0	43
1	6	0	1
0	2	0	0
0	0	0	0
0	0	0	27
0	0	0	1
0	0	0	0
0	0	0	7
0	0	0	11
0	0	0	11
3	0	0	0
0	27	0	0
0	5	0	7
0	0	0	0
0	0	0	0
0	0	0	0
0	2	0	0
0	55	0	1
0	124	0	44
0	75	9	0
0	9	0	0
0	7	4	0
0	10	14	0
0	26	14	0
0	0	1	0
0	2	0	0
0	10	0	0
0	0	1	1
0	35	0	45
0	2	3	0
2	56	0	0
0	2	0	52
1	33	0	0
1	0	0	0
7	113	4	2
0	0	0	2
0	22	0	0
0	54	0	37
0	0	0	0
0	22	0	0
0	0	0	0
0	0	0	4
0	4	3	2
0	18	0	2
0	7	0	16
0	2	19	0
2	76	0	8
0	7	0	0
0	14	0	26
0	89	2	4
1	1	0	40
0	0	57	14
0	0	0	0
0	0	1	0
1	10	0	0
0	0	0	1
1	0	7	0
17	0	0	0
0	0	1	0
0	0	4	0
0	0	8	1
0	0	0	0
0	0	0	1
0	3	0	0
0	0	3	0
0	0	0	6
0	0	1	1
0	2	0	0
0	2	0	0
0	0	13	0
0	19	1	2
0	5	0	4
1	1	0	0
0	19	3	0
0	1	5	0
0	29	0	49
0	3	2	24
0	1	131	13
0	11	1	0
0	0	0	48
0	0	47	3
0	1	0	0
0	1	37	0
0	0	49	0
0	0	0	2
0	19	15	0
1	1	4	5
0	84	1	0
0	14	7	0
0	1	60	0
0	1	0	0
0	9	0	0
0	73	2	8
0	39	0	0
0	31	26	0
0	6	42	0
0	0	1	26
0	21	1	2
0	12	1	0
1	16	1	0
6	58	0	0
3	26	5	0
6	58	3	1
2	32	1	4
0	3	1	0
0	0	24	262
0	1	0	2
0	18	19	5
1	56	1	0
0	5	0	12
0	55	45	0
0	4	166	0
5	0	17	39
0	6	0	59
0	0	1	2
1	0	10	0
0	0	0	14
3	0	1	34
0	0	0	4
0	17	1	30
0	29	0	28
0	15	0	1
0	296	0	168
0	49	0	37
0	128	1	77
2	0	0	0
0	7	0	0
0	1	0	31
0	6	0	0
0	0	0	3
0	47	3	11
0	1	0	0
0	5	3	22
0	23	1	65
0	0	1	18
0	40	0	50
0	429	0	17
0	61	0	32
0	0	0	6
0	5	0	37
3	0	0	700
0	128	0	58
0	54	0	0
0	0	0	6
0	0	82	74
0	9	2	0
3	34	0	60
0	8	3	277
0	24	0	57
0	142	0	54
0	6	2	25
0	874	0	2
0	35	1	259
0	54	0	25
0	1	0	3
0	10	0	20
0	1	1	21
0	300	34	37
0	95	4	47
0	0	1	101
0	51	0	0
0	4	0	60
0	5	0	44
0	64	0	6
0	96	0	28
4	1	1	10
9	42	7	3
0	0	9	0
0	4	27	35
0	2	2	0
0	28	0	0
0	34	0	0
0	20	0	48
0	0	0	0
0	7	0	1
0	17	4	0
0	34	0	19
0	1	1	0
0	11	0	0
0	6	5	0
0	0	0	0
5	6	6	0
0	46	1	11
0	22	0	0
0	40	0	109
0	0	0	0
0	46	1	0
0	2	1	0
0	0	6	0
0	0	0	1
1	63	0	0
0	0	95	22
0	9	41	0
0	2	72	0
0	0	18	24
7	0	150	1
25	26	190	4
0	2	56	23
0	3	1	0
0	0	0	0
0	38	0	0
0	2	0	0
0	62	21	25
0	1	0	0
0	47	0	4
0	0	0	0
0	2	0	0
0	40	0	0
0	32	0	0
0	223	0	0
0	53	0	57
0	0	0	2
0	95	0	0
0	46	0	0
0	24	0	13
0	0	0	2
0	4	0	0
0	0	0	0
0	0	0	4
0	35	0	0
0	1	0	0
0	4	0	1
0	6	0	0
0	0	0	0
5	0	0	0
1	232	0	0
0	24	0	0
0	13	0	0
0	3	0	0
0	52	0	0
0	38	0	7
0	5	0	16
0	5	0	0
3	98	0	59
0	2	0	0
0	125	0	39
0	2	0	55
0	0	0	3
0	0	0	106
0	20	0	0
0	0	0	0
0	0	0	11
0	0	0	0
0	3	0	62
0	22	0	10
0	1	0	0
0	0	0	1
0	17	0	0
0	0	0	4
0	0	0	98
0	0	0	9
0	14	0	0
28	2	0	111
0	29	0	17
0	15	0	0
0	0	0	0
0	25	0	0
0	83	0	39
0	3	0	0
1	0	0	22
0	13	0	0
14	1	0	62
0	0	0	0
0	13	0	21
2	1	0	0
1	12	0	0
0	2	0	1
0	0	0	0
2	77	0	0
0	19	0	1
0	13	0	0
0	0	0	74
0	0	0	0
2	0	0	109
8	12	0	64
4	9	0	23
0	25	0	19
0	4	0	0
0	16	0	31
2	1	0	283
0	74	0	0
5	35	0	6
1	1	0	116
0	74	0	2
0	6	0	0
3	13	0	96
0	1	0	0
1	0	0	2
0	175	0	182
8	0	0	0
0	22	0	0
0	0	0	4
3	0	0	0
0	3	0	1
0	91	0	31
0	73	0	0
0	0	0	64
0	0	0	0
0	56	0	1
0	31	0	20
0	42	0	15
1	3	0	0
0	23	0	0
0	0	0	0
0	4	0	0
0	1	0	0
0	41	0	0
0	0	0	8
0	6	0	8
0	7	0	0
0	0	0	0
4	2	0	14
8	0	0	4
0	0	0	2
0	5	0	3
0	13	0	1
63	0	0	0
87	0	0	0
2	1	0	471
0	40	0	1
0	0	0	5
0	6	0	8
0	6	0	0
0	0	0	0
1	0	0	1
0	0	0	7
20	0	0	143
0	8	0	1
1	0	0	0
167	1	0	118
5	0	0	17
1	0	0	4
28	0	0	59
2	4	0	110
11	12	0	15
42	0	0	7
0	22	0	73
38	4	0	1
4	3	0	1
0	4	0	37
25	18	0	0
1	2	0	78
2	0	0	202
88	1	0	192
28	0	0	5
9	2	0	22
0	2	0	1
19	14	5	1
1	3	0	103
4	0	0	1
7	0	0	2
22	1	0	38
1	0	0	65
0	0	0	12
6	5	0	37
43	1	0	88
2	39	0	4
1	0	0	3
0	4	0	8
39	0	0	49
14	79	0	11
0	16	216	695
0	64	0	43
0	0	0	71
0	0	0	0
0	51	0	4
0	0	0	38
1	47	0	0
0	14	0	53
0	10	0	13
0	0	0	176
1	43	0	102
9	0	0	45
0	0	4	332
3	15	8	549
8	34	0	31
0	0	2	169
0	1	18	146
0	0	2	0
0	0	0	49
0	0	0	78
0	35	1	12
0	0	0	100
0	0	7	0
0	0	0	21
0	0	49	114
7	0	0	188
0	0	0	189
0	3	0	53
0	2	1	113
3	69	0	127
0	24	47	148
0	71	6	81
0	59	0	38
0	0	0	120
0	4	0	0
7	3	8	9
21	13	0	97
0	78	0	0
0	0	1	0
25	2	1	0
23	44	2	1
0	60	0	3
0	55	1	0
0	13	0	1
0	4	0	18
0	47	0	3
0	89	0	0
0	8	0	14
4	0	0	0
0	0	9	71
35	11	94	5
0	0	10	20
0	1	0	2
0	42	0	171
0	1	3	3
0	1	0	0
76	0	0	1
0	0	2	2
0	0	0	3
0	0	0	118
18	0	0	28
0	14	0	0
8	0	0	0
73	0	0	1
3	0	0	29
0	3	1	1
0	88	0	64
0	0	15	5
0	0	0	23
0	0	0	22
	0	0	30
	49	1	0
	37	0	0
	0	1	0
	0	0	146
	0	0	48
	0	0	1
	7	0	1
	1	0	75
	2	2	1
	0	0	0
	0	0	86
	0	3	8
	0	0	11
	3	0	0
	0	2	33
	26	3	209
	0	6	41
	12	3	4
	14	1	6
	17	0	16
	0	3	193
	1	3	0
	9	0	11
	0	0	12
	0	0	1
	7	3	18
	0	0	0
	34	0	0
	23	0	0
	0	1	0
	0	0	13
	0	0	0
	1	0	0
	2	1	0
	0	0	0
	0	0	22
	0	1	4
	95	4	0
	2	0	1
	10	0	0
	3	9	49
	77	4	0
	14	0	35
	3	0	0
	129	3	0
	4	0	0
	107	0	16
	0	2	0
	6	0	3
	15	4	26
	33	0	0
	113	1	9
	17	17	0
	27	4	7
	46	1	0
	0	14	0
	2	1	0
	11	15	6
	0	4	0
	0	11	0
	5	9	12
	2	7	0
	0	2	26
	7	7	3
	55	21	24
	0	0	3
	0	15	1
	0	1	63
	0	0	2
	0	3	20
	14	7	43
	0	0	0
	0	5	0
	0	0	4
	3	3	46
	88	1	6
	0	6	1
	0	7	3
	0	28	67
	0	2	0
	49	1	7
	37	7	13
	0	4	6
	0	18	26
	0	26	0
	0	53	18
	7	98	99
	1	131	57
	2	6	2
	0	1	3
	0	9	12
	0	11	41
	0	0	11
	3	42	1
	0	22	0
	26	3	0
	0	45	7
	12	18	3
	14	5	0
	17	29	0
	0	6	17
	1	3	1
	9	1	0
	0	2	6
	0	0	1
	7	1	0
	0	10	0
	34	0	0
	23	4	1
	0	0	4
	0	0	2
	0	0	0
	1	0	22
	2	0	34
	0	0	0
	0	0	3
	0	0	31
	95	0	0
	2	42	0
	10	0	0
	3	0	0
	77	0	13
	14	0	0
	3	0	37
	129	0	0
	4	0	0
	107	0	0
	0	0	0
	6	0	35
	15	0	2
	33	0	45
	113	0	0
	17	0	1
	27	0	6
	46	0	5
	0	0	0
	2	0	0
	11	0	4
	0	0	38
	0	0	0
	5	0	0
	2	0	14
	0	0	6
	7	0	47
	55	0	16
	0	0	9
		0	56
		0	2
		0	42
		0	10
		0	110
		0	105
		0	0
		0	46
		0	56
		0	99
		0	0
		0	2
		0	47
		0	0
		0	326
		0	3
		0	15
		0	2
		0	10
		0	11
		0	0
		0	1
		0	3
		0	0
		0	19
		0	0
		0	0
		0	25
		0	3
		0	139
		0	21
		0	0
		0	21
		0	28
		0	7
		0	12
		0	86
		0	1
		0	6
		0	0
		0	0
		0	22
		0	0
		0	2
		0	0
		0	137
		0	22
		0	0
		0	0
		0	9
		0	0
		0	0
		0	23
		0	0
		0	79
		0	3
		0	91
		0	0
		0	257
		0	3
		0	0
		1	37
		0	0
		0	1
		0	62
		0	94
		0	0
		0	14
		0	11
		0	0
		0	0
		0	50
		0	0
		0	0
		0	8
		0	0
		0	181
		0	0
		0	3
		0	0
		0	54
		0	46
		0	0
		0	0
		0	10
		0	4
		1	3
		0	16
		0	12
		0	90
		0	0
		0	80
		0	6
		0	41
		0	1
		0	0
		0	2
		5	4
		0	0
		10	0
		0	1
		0	0
		0	11
		0	2
		9	0
		1	6
		0	5
		0	0
		0	0
		13	25
		29	3
		2	22
		1	11
		12	1
		0	1
		5	3
		0	49
		0	17
		12	105
		6	35
		5	40
		3	46
		14	0
		2	1
		16	6
		1	4
		0	0
		45	0
		10	6
		5	37
		20	4
		1	24
		8	181
		22	18
		1	410
		11	0
		0	7
		9	62
		0	0
		2	123
		3	19
		0	21
		5	87
		0	13
		0	9
		5	33
		8	6
		4	9
		21	171
		4	66
		22	21
		8	0
		2	0
		1	3
		7	44
		15	94
		6	76
		5	0
		93	18
		4	1
		24	0
		6	0
		29	1
		7	7
		118	2
		11	14
		20	1
		90	33
		31	0
		63	81
		1	0
		29	33
		10	6
		1	6
		7	2
		2	0
		12	69
		15	4
		0	52
		0	7
		0	0
		0	10
		3	12
		0	103
		1	18
		0	89
		3	1
		0	33
		0	1
		0	18
		0	49
		142	0
		0	0
		0	1
		0	50
		0	0
		0	18
		46	11
		12	39
		0	1
		8	2
		5	12
		0	0
		1	56
		0	33
		1	51
		0	0
		2	71
		1	68
		25	6
		0	0
		4	0
		33	17
		0	0
		24	0
		0	0
		57	66
		5	49
		0	0
		0	0
		6	18
		10	57
		0	11
		21	0
		0	0
		5	0
		0	0
		0	7
		7	37
		13	1
		0	0
		2	1
		0	0
		244	46
		0	0
		0	0
		0	1
		0	0
		1	78
		2	17
		0	34
		0	0
		0	36
		1	0
		0	0
		2	0
		0	3
		5	78
		0	0
		118	0
		3	2
		7	14
		2	34
		0	4
		0	324
		0	0
		0	4
		0	0
		68	9
		0	37
		0	2
		0	14
		0	0
		18	0
		6	1
		28	12
		0	53
		0	0
		0	0
		0	53
		0	0
		9	1
		0	0
		18	36
		0	0
		10	77
		8	6
		15	1
		0	133
		1	0
		0	22
		0	12
		0	10
		124	4
		4	0
		0	2
		0	12
		0	0
		0	56
		74	0
		0	0
		4	0
		2	0
		0	14
		0	0
		1	0
		2	0
		19	0
		3	14
		3	0
		69	0
		0	0
		45	172
		0	5
		0	27
		0	0
		0	4
		0	0
		0	1
		408	0
		3	0
		13	0
		0	57
		12	0
		11	0
		0	0
		0	22
		0	8
		1	0
		53	19
		0	0
		56	0
		4	0
		2	38
		3	0
		4	0
		0	0
		30	0
		0	69
		0	1
		11	140
		5	0
		6	0
		0	142
		34	0
		18	0
		2	0
		0	57
		29	0
		14	0
		43	0
		1	0
		0	0
		0	0
		4	1
		0	20
		0	8
		0	1
		35	64
		0	14
		0	2
		1	0
		0	1
		0	1
		0	0
		0	24
		4	0
		0	0
		1	2
		6	14
		3	4
		0	0
		46	15
		0	0
		106	5
		48	28
		0	0
		3	6
		11	1
		4	60
		12	0
		0	0
		10	1
		0	0
		4	3
		0	0
		12	0
		4	0
		27	0
		18	0
		7	0
		5	0
		0	0
		0	0
		0	0
		40	0
		3	0
		0	0
		61	0
		5	8
		365	4
		2	0
		23	0
		0	0
		0	10
		4	0
		2	38
		21	2
		0	0
		1	0
		0	0
		12	0
		0	0
		0	81
		6	0
		0	0
		0	46
		0	24
		165	0
		1	15
		0	20
		0	14
		0	1
		107	0
		13	0
		42	2
		0	2
		1	1
		0	37
		0	0
		68	17
		131	0
		0	44
		31	0
		0	39
		0	29
		0	0
		0	0
		0	15
		6	39
		0	4
		0	90
		0	17
		0	2
		0	0
		0	0
		0	63
		0	0
		0	20
		0	3
		0	1
		0	0
		0	135
		21	118
		0	102
		0	11
		0	45
		0	8
		1	62
		1	5
		10
		0
		5
		0
		1
		4
		4
		0
		3
		1
		9
		0
		0
		52
		11
		0
		11
		0
		0
		26
		28
		69
		2
		142
		5
		0
		0
		14
		1
		2
		10
		0
		83
		3
		46
		33
		6
		67
		63
		5
		0
		0
		0
		0
		0
		0
		35
		0
		0
		0
		0
		0
		0
		0
		0
		0
		0
		102
		0
		0
		0
		0
		1
		22
		35
		0
		0
		0
		0
		10
		0
		31
		0
		0
		25
		0
		0
		96
		50
		24
		0
		14
		0
		10
		0
		28
		54
		6
		132
		4
		0
		108
		4
		0
		77
		0
		210
		50
		12
		53
		0
		0
		0
		30
		7
		0
		0
		0
		4
		0
		0
		33
		0
		0
		0
		18
		0
		0
		67
		29
		1
		0
		0
		6
		0
		0
		27
		0
		0
		4
		0
		0
		0
		0
		2
		47
		0
		0
		0
		0
		3
		0
		2
		64
		0
		2
		0
		10
		0
		0
		0
		0
		0
		0
		0
		19
		0
		1
		32
		0
		0
		0
		0
		25
		0
		0
		29
		1
		0
		0
		0
		8
		16
		0
		33
		59
		0
		7
		0
		0
		5
		6
		0
		8
		0
		12
		0
		4
		0
		0
		1
		88
		0
		1
		6
		0
		0
		0
		0
		5
		12
		0
		9
		0
		0
		0
		46
		11
		0
		0
		1
		0
		0
		0
		0
		0
		72
		35
		0
		93
		44
		4
		0
		119
		15
		2
		0
		46
		0
		2
		2
		7
		0
		6
		3
		0
		30
		0
		0
		0
		1
		0
		0
		26
		60
		1
		9
		28
		12
		0
		0
		38
		1
		41
		0
		20
		37
		18
		23
		21
		0
		61
		5
		5
		181
		34
		185
		5
		102
		33
		0
		2
		3
		1
		45
		39
		0
		5

## Sheet: bilan donnée souris
NI	PTV	M2PN	M2O1	F2PN	F2O1
0	1	0	1	15	4			NI	PTV	M2PN	M2O1	F2PN	F2O1
0	0	0	0	0	0		Moyenne	3.52907	15.7042	5.31423	18.4632	14.2777	25.0358
7	4	0	3	0	0		SD	14.681	44.678	22.044	48.8216	37.084	56.4918
0	65	0	0	0	1		t test		2.70938e-13	0.0452187	2.24905e-10	2.65089e-10	3.65467e-24
0	0	0	24	0	0
0	5	0	0	3	0
1	0	0	14	0	0
0	0	0	0	1	0
0	0	0	16	0	0
0	8	0	0	3	0
0	8	3	0	0	0
0	0	0	62	0	0
0	0	0	108	0	7
0	0	0	28	0	16
0	0	0	7	142	0
0	10	0	22	0	59
12	0	0	0	0	0
1	1	12	3	0	39
28	2	0	6	0	55
0	0	0	0	0	3
0	1	0	11	46	106
0	0	0	54	12	0
0	0	0	0	0	0
79	41	0	108	8	11
0	0	0	280	5	0
0	0	0	24	0	62
0	17	0	2	1	10
0	0	0	13	0	0
0	1	0	0	1	1
0	0	0	39	0	0
0	1	0	66	2	4
0	53	6	0	1	98
0	1	0	60	25	9
0	0	0	0	0	0
0	12	0	7	4	111
0	11	0	42	33	17
0	36	1	5	0	0
20	0	0	0	24	0
2	2	0	0	0	0
0	0	0	5	57	39
18	6	0	0	5	0
0	0	0	12	0	22
3	0	0	92	0	0
1	0	0	118	6	62
1	1	0	0	10	0
2	1	24	52	0	21
138	14	0	6	21	0
1	1	0	2	0	0
0	2	0	1	5	1
0	20	0	3	0	0
8	0	2	59	0	0
188	0	9	35	7	1
1	3	0	0	13	0
0	1	0	1	0	74
3	0	0	1	2	0
0	5	0	0	0	109
0	5	0	0	244	64
0	31	0	1	0	23
8	17	0	0	0	19
12	0	0	0	0	0
2	22	0	23	0	31
0	41	0	74	1	283
3	0	0	0	2	0
84	0	0	2	0	6
18	39	0	0	0	116
33	2	12	78	0	2
2	0	0	0	1	0
13	6	0	0	0	96
26	0	0	32	2	0
55	2	0	0	0	2
4	1	0	0	5	182
0	0	0	0	0	0
7	0	0	0	118	0
0	5	0	0	3	4
7	7	0	0	7	0
5	3	0	6	2	1
0	1	0	5	0	31
1	6	0	21	0	0
0	0	0	47	0	64
0	8	0	0	0	0
1	1	0	0	0	1
0	1	0	7	68	20
11	16	0	11	0	15
0	1	0	34	0	0
40	17	0	0	0	0
0	0	0	9	0	0
0	6	0	76	18	0
0	0	0	0	6	0
0	0	0	15	28	0
0	1	0	40	0	8
0	97	0	6	0	8
0	0	0	12	0	0
17	24	0	60	0	0
1	4	0	75	0	14
0	51	0	53	9	4
0	7	0	0	0	2
0	0	0	0	18	3
1	10	0	3	0	1
0	5	0	10	10	0
0	0	0	3	8	0
0	19	0	17	15	471
0	31	0	0	0	1
0	2	3	0	1	5
0	17	1	4	0	8
1	3	0	53	0	0
0	11	0	0	0	0
2	2	11	0	124	1
1	2	0	37	4	7
0	33	4	86	0	143
1	0	0	10	0	1
0	0	0	14	0	0
0	9	0	170	0	118
1	0	0	23	74	17
0	4	0	53	0	4
2	0	2	0	4	59
2	6	0	0	2	110
0	0	1	0	0	15
0	0	0	1	0	7
0	0	0	0	1	73
0	0	0	0	2	1
2	2	1	0	19	1
0	19	1	0	3	37
22	0	0	25	3	0
0	1	1	0	69	78
2	0	1	43	0	202
0	0	0	0	45	192
0	0	2	3	0	5
0	5	0	0	0	22
41	0	0	0	0	1
0	0	0	6	0	1
0	29	0	0	0	103
0	0	0	0	0	1
0	0	238	0	408	2
0	0	0	2	3	38
0	0	0	0	13	65
0	2	0	0	0	12
17	0	0	0	12	37
0	0	0	0	11	88
1	0	25	0	0	4
0	0	0	0	0	3
0	1	0	0	0	8
0	0	0	8	1	49
1	0	1	15	53	11
0	41	0	2	0	695
0	0	0	348	56	43
0	34	1	0	4	71
0	0	0	0	2	0
0	38	1	0	3	4
0	1	0	19	4	38
0	8	0	79	0	0
0	1	0	0	30	53
0	8	11	25	0	13
0	25	0	2	0	176
0	0	0	10	11	102
0	21	0	0	5	45
0	7	0	76	6	332
0	1	1	21	0	549
0	2	0	0	34	31
1	1	1	11	18	169
1	0	9	0	2	146
12	1	0	0	0	0
0	4	0	0	29	49
0	1	0	0	14	78
14	10	0	0	43	12
0	1	1	0	1	100
0	0	1	0	0	0
0	0	52	37	0	21
0	9	0	8	4	114
0	71	0	47	0	188
0	0	1	20	0	189
30	0	0	0	0	53
24	0	19	0	35	113
0	0	24	0	0	127
0	0	0	0	0	148
0	0	15	0	1	81
2	0	1	16	0	38
0	0	23	2	0	120
0	0	0	0	0	0
1	0	1	50	0	9
0	1	0	49	4	97
0	6	28	28	0	0
0	1	6	40	1	0
0	11	0	42	6	0
0	114	2	27	3	1
0	0	3	23	0	3
0	2	3	49	46	0
11	6	139	66	0	1
1	0	3	24	106	18
4	5	0	0	48	3
3	25	0	0	0	0
0	0	3	0	3	14
2	0	1	1	11	0
1	11	6	1	4	71
1	0	3	8	12	5
0	2	2	0	0	20
0	24	23	22	10	2
0	0	16	0	0	171
0	1	0	1	4	3
0	2	1	0	0	0
0	1	12	40	12	1
0	3	1	1	4	2
0	0	0	0	27	3
0	0	4	0	18	118
0	0	31	115	7	28
7	0	5	61	5	0
0	0	0	43	0	0
0	5	10	0	0	1
0	0	0	23	0	29
0	0	6	0	40	1
0	0	4	0	3	64
0	0	1	0	0	5
0	0	0	41	61	23
0	0	1	4	5	22
0	0	23	0	365	30
0	0	0	10	2	0
0	0	356	0	23	0
0	23	2	47	0	0
0	9	84	5	0	146
0	0	1	98	4	48
0	0	0	0	2	1
1	1	0	0	21	1
0	0	0	0	0	75
0	0	0	30	1	1
0	0	0	0	0	0
0	6	0	15	12	86
5	1	0	10	0	8
0	0	0	1	0	11
0	0	0	3	6	0
0	0	0	3	0	33
0	0	0	1	0	209
0	0	0	0	0	41
0	2	0	3	165	4
0	79	0	0	1	6
1	0	0	2	0	16
0	0	0	30	0	193
0	0	0	78	0	0
0	1	0	17	107	11
0	5	0	0	13	12
0	1	0	90	42	1
0	0	0	7	0	18
0	3	0	0	1	0
0	5	0	2	0	0
0	6	1	49	0	0
0	0	0	0	68	0
0	2	0	0	131	13
0	4	0	55	0	0
0	0	0	0	31	0
0	1	0	0	0	0
2	0	0	0	0	0
0	1	0	0	0	22
0	4	0	7	0	4
1	27	0	1	0	0
0	2	0	0	6	1
0	0	0	0	0	0
0	4	0	6	0	49
0	0	0	0	0	0
0	0	0	0	0	35
0	0	0	43	0	0
1	6	0	1	0	0
0	2	0	0	0	0
0	0	0	0	0	16
0	0	0	27	0	0
0	0	0	1	0	3
0	0	0	0	0	26
0	0	0	7	0	0
0	0	0	11	0	9
0	0	0	11	21	0
3	0	0	0	0	7
0	27	0	0	0	0
0	5	0	7	0	0
0	0	0	0	0	0
0	0	0	0	1	6
0	0	0	0	1	0
0	2	0	0	10	0
0	55	0	1	0	12
0	124	0	44	5	0
0	75	9	0	0	26
0	9	0	0	1	3
0	7	4	0	4	24
0	10	14	0	4	3
0	26	14	0	0	1
0	0	1	0	3	63
0	2	0	0	1	2
0	10	0	0	9	20
0	0	1	1	0	43
0	35	0	45	0	0
0	2	3	0	52	0
2	56	0	0	11	4
0	2	0	52	0	46
1	33	0	0	11	6
1	0	0	0	0	1
7	113	4	2	0	3
0	0	0	2	26	67
0	22	0	0	28	0
0	54	0	37	69	7
0	0	0	0	2	13
0	22	0	0	142	6
0	0	0	0	5	26
0	0	0	4	0	0
0	4	3	2	0	18
0	18	0	2	14	99
0	7	0	16	1	57
0	2	19	0	2	2
2	76	0	8	10	3
0	7	0	0	0	12
0	14	0	26	83	41
0	89	2	4	3	11
1	1	0	40	46	1
0	0	57	14	33	0
0	0	0	0	6	0
0	0	1	0	67	7
1	10	0	0	63	3
0	0	0	1	5	0
1	0	7	0	0	0
17	0	0	0	0	17
0	0	1	0	0	1
0	0	4	0	0	0
0	0	8	1	0	6
0	0	0	0	0	1
0	0	0	1	35	0
0	3	0	0	0	0
0	0	3	0	0	0
0	0	0	6	0	1
0	0	1	1	0	4
0	2	0	0	0	2
0	2	0	0	0	0
0	0	13	0	0	22
0	19	1	2	0	34
0	5	0	4	0	0
1	1	0	0	0	3
0	19	3	0	102	31
0	1	5	0	0	0
0	29	0	49	0	0
0	3	2	24	0	0
0	1	131	13	0	0
0	11	1	0	1	13
0	0	0	48	22	0
0	0	47	3	35	37
0	1	0	0	0	0
0	1	37	0	0	0
0	0	49	0	0	0
0	0	0	2	0	0
0	19	15	0	10	35
1	1	4	5	0	2
0	84	1	0	31	45
0	14	7	0	0	0
0	1	60	0	0	1
0	1	0	0	25	6
0	9	0	0	0	5
0	73	2	8	0	0
0	39	0	0	96	0
0	31	26	0	50	4
0	6	42	0	24	38
0	0	1	26	0	0
0	21	1	2	14	0
0	12	1	0	0	14
1	16	1	0	10	6
6	58	0	0	0	47
3	26	5	0	28	16
6	58	3	1	54	9
2	32	1	4	6	56
0	3	1	0	132	2
0	0	24	262	4	42
0	1	0	2	0	10
0	18	19	5	108	110
1	56	1	0	4	105
0	5	0	12	0	0
0	55	45	0	77	46
0	4	166	0	0	56
5	0	17	39	210	99
0	6	0	59	50	0
0	0	1	2	12	2
1	0	10	0	53	47
0	0	0	14	0	0
3	0	1	34	0	326
0	0	0	4	0	3
0	17	1	30	30	15
0	29	0	28	7	2
0	15	0	1	0	10
0	296	0	168	0	11
0	49	0	37	0	0
0	128	1	77	4	1
2	0	0	0	0	3
0	7	0	0	0	0
0	1	0	31	33	19
0	6	0	0	0	0
0	0	0	3	0	0
0	47	3	11	0	25
0	1	0	0	18	3
0	5	3	22	0	139
0	23	1	65	0	21
0	0	1	18	67	0
0	40	0	50	29	21
0	429	0	17	1	28
0	61	0	32	0	7
0	0	0	6	0	12
0	5	0	37	6	86
3	0	0	700	0	1
0	128	0	58	0	6
0	54	0	0	27	0
0	0	0	6	0	0
0	0	82	74	0	22
0	9	2	0	4	0
3	34	0	60	0	2
0	8	3	277	0	0
0	24	0	57	0	137
0	142	0	54	0	22
0	6	2	25	2	0
0	874	0	2	47	0
0	35	1	259	0	9
0	54	0	25	0	0
0	1	0	3	0	0
0	10	0	20	0	23
0	1	1	21	3	0
0	300	34	37	0	79
0	95	4	47	2	3
0	0	1	101	64	91
0	51	0	0	0	0
0	4	0	60	2	257
0	5	0	44	0	3
0	64	0	6	10	0
0	96	0	28	0	37
4	1	1	10	0	0
9	42	7	3	0	1
0	0	9	0	0	62
0	4	27	35	0	94
0	2	2	0	0	0
0	28	0	0	0	14
0	34	0	0	19	11
0	20	0	48	0	0
0	0	0	0	1	0
0	7	0	1	32	50
0	17	4	0	0	0
0	34	0	19	0	0
0	1	1	0	0	8
0	11	0	0	0	0
0	6	5	0	25	181
0	0	0	0	0	0
5	6	6	0	0	3
0	46	1	11	29	0
0	22	0	0	1	54
0	40	0	109	0	46
0	0	0	0	0	0
0	46	1	0	0	0
0	2	1	0	8	10
0	0	6	0	16	4
0	0	0	1	0	3
1	63	0	0	33	16
0	0	95	22	59	12
0	9	41	0	0	90
0	2	72	0	7	0
0	0	18	24	0	80
7	0	150	1	0	6
25	26	190	4	5	41
0	2	56	23	6	1
0	3	1	0	0	0
0	0	0	0	8	2
0	38	0	0	0	4
0	2	0	0	12	0
0	62	21	25	0	0
0	1	0	0	4	1
0	47	0	4	0	0
0	0	0	0	0	11
0	2	0	0	1	2
0	40	0	0	88	0
0	32	0	0	0	6
0	223	0	0	1	5
0	53	0	57	6	0
0	0	0	2	0	0
0	95	0	0	0	25
0	46	0	0	0	3
0	24	0	13	0	22
0	0	0	2	5	11
0	4	0	0	12	1
0	0	0	0	0	1
0	0	0		9	3
0	35	0		0	49
0	1	0		0	17
0	4	0		0	105
0	6	0		46	35
0	0	0		11	40
5	0	0		0	46
1	232	0		0	0
0	24	0		1	1
0	13	0		0	6
0	3	0		0	4
0	52	0		0	0
0	38	0		0	0
0	5	0		0	6
0	5	0		72	37
3	98	0		35	4
0	2	0		0	24
0	125	0		93	181
0	2	0		44	18
0	0	0		4	410
0	0	0		0	0
0	20	0		119	7
0	0	0		15	62
0	0	0		2	0
0	0	0		0	123
0	3	0		46	19
0	22	0		0	21
0	1	0		2	87
0	0	0		2	13
0	17	0		7	9
0	0	0		0	33
0	0	0		6	6
0	0	0		3	9
0	14	0		0	171
28	2	0		30	66
0	29	0		0	21
0	15	0		0	0
0	0	0		0	0
0	25	0		1	3
0	83	0		0	44
0	3	0		0	94
1	0	0		26	76
0	13	0		60	0
14	1	0		1	18
0	0	0		9	1
0	13	0		28	0
2	1	0		12	0
1	12	0		0	1
0	2	0		0	7
0	0	0		38	2
2	77	0		1	14
0	19	0		41	1
0	13	0		0	33
0	0	0		20	0
0	0	0		37	81
2	0	0		18	0
8	12	0		23	33
4	9	0		21	6
0	25	0		0	6
0	4	0		61	2
0	16	0		5	0
2	1	0		5	69
0	74	0		181	4
5	35	0		34	52
1	1	0		185	7
0	74	0		5	0
0	6	0		102	10
3	13	0		33	12
0	1	0		0	103
1	0	0		2	18
0	175	0		3	89
8	0	0		1	1
0	22	0		45	33
0	0	0		39	1
3	0	0		0	18
0	3	0		5	49
0	91	0			0
0	73	0			0
0	0	0			1
0	0	0			50
0	56	0			0
0	31	0			18
0	42	0			11
1	3	0			39
0	23	0			1
0	0	0			2
0	4	0			12
0	1	0			0
0	41	0			56
0	0	0			33
0	6	0			51
0	7	0			0
0	0	0			71
4	2	0			68
8	0	0			6
0	0	0			0
0	5	0			0
0	13	0			17
63	0	0			0
87	0	0			0
2	1	0			0
0	40	0			66
0	0	0			49
0	6	0			0
0	6	0			0
0	0	0			18
1	0	0			57
0	0	0			11
20	0	0			0
0	8	0			0
1	0	0			0
167	1	0			0
5	0	0			7
1	0	0			37
28	0	0			1
2	4	0			0
11	12	0			1
42	0	0			0
0	22	0			46
38	4	0			0
4	3	0			0
0	4	0			1
25	18	0			0
1	2	0			78
2	0	0			17
88	1	0			34
28	0	0			0
9	2	0			36
0	2	0			0
19	14	5			0
1	3	0			0
4	0	0			3
7	0	0			78
22	1	0			0
1	0	0			0
0	0	0			2
6	5	0			14
43	1	0			34
2	39	0			4
1	0	0			324
0	4	0			0
39	0	0			4
14	79	0			0
0	16	216			9
0	64	0			37
0	0	0			2
0	0	0			14
0	51	0			0
0	0	0			0
1	47	0			1
0	14	0			12
0	10	0			53
0	0	0			0
1	43	0			0
9	0	0			53
0	0	4			0
3	15	8			1
8	34	0			0
0	0	2			36
0	1	18			0
0	0	2			77
0	0	0			6
0	0	0			1
0	35	1			133
0	0	0			0
0	0	7			22
0	0	0			12
0	0	49			10
7	0	0			4
0	0	0			0
0	3	0			2
0	2	1			12
3	69	0			0
0	24	47			56
0	71	6			0
0	59	0			0
0	0	0			0
0	4	0			0
7	3	8			14
21	13	0			0
0	78	0			0
0	0	1			0
25	2	1			0
23	44	2			14
0	60	0			0
0	55	1			0
0	13	0			0
0	4	0			172
0	47	0			5
0	89	0			27
0	8	0			0
4	0	0			4
0	0	9			0
35	11	94			1
0	0	10			0
0	1	0			0
0	42	0			0
0	1	3			57
0	1	0			0
76	0	0			0
0	0	2			0
0	0	0			22
0	0	0			8
18	0	0			0
0	14	0			19
8	0	0			0
73	0	0			0
3	0	0			0
0	3	1			38
0	88	0			0
0	0	15			0
0	0	0			0
0	0	0			0
	0	0			69
	49	1			1
	37	0			140
	0	1			0
	0	0			0
	0	0			142
	0	0			0
	7	0			0
	1	0			0
	2	2			57
	0	0			0
	0	0			0
	0	3			0
	0	0			0
	3	0			0
	0	2			0
	26	3			1
	0	6			20
	12	3			8
	14	1			1
	17	0			64
	0	3			14
	1	3			2
	9	0			0
	0	0			1
	0	0			1
	7	3			0
	0	0			24
	34	0			0
	23	0			0
	0	1			2
	0	0			14
	0	0			4
	1	0			0
	2	1			15
	0	0			0
	0	0			5
	0	1			28
	95	4			0
	2	0			6
	10	0			1
	3	9			60
	77	4			0
	14	0			0
	3	0			1
	129	3			0
	4	0			3
	107	0			0
	0	2			0
	6	0			0
	15	4			0
	33	0			0
	113	1			0
	17	17			0
	27	4			0
	46	1			0
	0	14			0
	2	1			0
	11	15			0
	0	4			0
	0	11			0
	5	9			8
	2	7			4
	0	2			0
	7	7			0
	55	21			0
	0	0			10
	0	15			0
	0	1			38
	0	0			2
	0	3			0
	14	7			0
	0	0			0
	0	5			0
	0	0			0
	3	3			81
	88	1			0
	0	6			0
	0	7			46
	0	28			24
	0	2			0
	49	1			15
	37	7			20
	0	4			14
	0	18			1
	0	26			0
	0	53			0
	7	98			2
	1	131			2
	2	6			1
	0	1			37
	0	9			0
	0	11			17
	0	0			0
	3	42			44
	0	22			0
	26	3			39
	0	45			29
	12	18			0
	14	5			0
	17	29			15
	0	6			39
	1	3			4
	9	1			90
	0	2			17
	0	0			2
	7	1			0
	0	10			0
	34	0			63
	23	4			0
	0	0			20
	0	0			3
	0	0			1
	1	0			0
	2	0			135
	0	0			118
	0	0			102
	0	0			11
	95	0			45
	2	42			8
	10	0			62
	3	0			5
	77	0
	14	0
	3	0
	129	0
	4	0
	107	0
	0	0
	6	0
	15	0
	33	0
	113	0
	17	0
	27	0
	46	0
	0	0
	2	0
	11	0
	0	0
	0	0
	5	0
	2	0
	0	0
	7	0
	55	0
	0	0
		0
		0
		0
		0
		0
		0
		0
		0
		0
		0
		0
		0
		0
		0
		0
		0
		0
		0
		0
		0
		0
		0
		0
		0
		0
		0
		0
		0
		0
		0
		0
		0
		0
		0
		0
		0
		0
		0
		0
		0
		0
		0
		0
		0
		0
		0
		0
		0
		0
		0
		0
		0
		0
		0
		0
		0
		0
		0
		0
		0
		0
		1
		0
		0
		0
		0
		0
		0
		0
		0
		0
		0
		0
		0
		0
		0
		0
		0
		0
		0
		0
		0
		0
		0
		0
		0
		1
		0
		0
		0
		0
		0
		0
		0
		0
		0
		0
		5
		0
		10
		0
		0
		0
		0
		9
		1
		0
		0
		0
		13
		29
		2
		1
		12
		0
		5
		0
		0
		12
		6
		5
		3
		14
		2
		16
		1
		0
		45
		10
		5
		20
		1
		8
		22
		1
		11
		0
		9
		0
		2
		3
		0
		5
		0
		0
		5
		8
		4
		21
		4
		22
		8
		2
		1
		7
		15
		6
		5
		93
		4
		24
		6
		29
		7
		118
		11
		20
		90
		31
		63
		1
		29
		10
		1
		7
		2
		12

## Sheet: NI
1	0
2	0		3.52907
3	7
4	0
5	0
6	0
7	1
8	0
9	0
10	0
11	0
12	0
13	0
14	0
15	0
16	0
17	12
18	1
19	28
20	0
21	0
22	0
23	0
24	79
25	0
26	0
27	0
28	0
29	0
30	0
31	0
32	0
33	0
34	0
35	0
36	0
37	0
38	20
39	2
40	0
41	18
42	0
43	3
44	1
45	1
46	2
47	138
48	1
49	0
50	0
51	8
52	188
53	1
54	0
55	3
56	0
57	0
58	0
59	8
60	12
61	2
62	0
63	3
64	84
65	18
66	33
67	2
68	13
69	26
70	55
71	4
72	0
73	7
74	0
75	7
76	5
77	0
78	1
79	0
80	0
81	1
82	0
83	11
84	0
85	40
1	0
2	0
3	0
4	0
5	0
6	0
7	0
8	17
9	1
10	0
11	0
12	0
13	1
14	0
15	0
16	0
17	0
18	0
19	0
20	1
21	0
22	2
23	1
24	0
25	1
26	0
27	0
28	1
29	0
30	2
31	2
32	0
33	0
34	0
35	0
36	2
37	0
38	22
39	0
40	2
41	0
42	0
43	0
44	41
45	0
46	0
47	0
48	0
49	0
50	0
51	0
52	17
53	0
54	1
55	0
56	0
57	0
58	1
59	0
1	0
2	0
3	0
4	0
5	0
6	0
7	0
8	0
9	0
10	0
11	0
12	0
13	0
14	0
15	1
16	1
17	12
18	0
19	0
20	14
21	0
22	0
23	0
24	0
25	0
26	0
27	30
28	24
29	0
30	0
31	0
32	2
33	0
34	0
35	1
36	0
37	0
38	0
39	0
40	0
41	0
42	0
43	11
44	1
45	4
46	3
47	0
48	2
49	1
50	1
51	0
52	0
53	0
1	0
2	0
3	0
4	0
5	0
6	0
7	0
8	7
9	0
10	0
11	0
12	0
13	0
14	0
15	0
16	0
17	0
18	0
19	0
20	0
21	0
22	0
23	0
24	1
25	0
26	0
27	0
28	0
29	5
30	0
31	0
32	0
33	0
34	0
35	0
36	0
37	1
38	0
39	0
40	0
41	0
42	0
43	0
44	0
45	0
46	0
47	0
48	0
49	0
50	0
51	0
52	2
53	0
54	0
55	1
56	0
57	0
58	0
59	0
60	0
61	0
62	1
63	0
64	0
65	0
66	0
67	0
68	0
69	0
70	0
71	3
72	0
73	0
1	0
2	0
3	0
4	0
5	0
6	0
7	0
8	0
9	0
10	0
11	0
12	0
13	0
14	0
15	0
16	0
17	0
18	2
19	0
20	1
21	1
22	7
23	0
24	0
25	0
26	0
27	0
28	0
29	0
30	0
31	0
32	0
33	0
34	2
35	0
36	0
37	0
38	1
39	0
40	0
41	0
42	1
43	0
44	1
45	17
46	0
47	0
1	0
2	0
3	0
4	0
5	0
6	0
7	0
8	0
9	0
10	0
11	0
12	0
13	1
14	0
15	0
16	0
17	0
18	0
19	0
20	0
21	0
22	0
23	0
24	0
25	0
26	0
27	1
28	0
29	0
30	0
31	0
32	0
33	0
34	0
35	0
36	0
37	0
38	0
39	0
40	1
41	6
42	3
43	6
44	2
45	0
46	0
47	0
48	0
49	1
50	0
51	0
52	0
53	5
54	0
55	0
56	1
57	0
58	3
59	0
60	0
1	0
2	0
3	0
4	0
5	0
6	2
7	0
8	0
9	0
10	0
11	0
12	0
13	0
14	0
15	0
16	0
17	0
18	0
19	0
20	0
21	3
22	0
23	0
24	0
25	0
26	0
27	3
28	0
29	0
30	0
31	0
32	0
33	0
34	0
35	0
36	0
37	0
38	0
39	0
40	0
41	0
42	0
43	0
44	0
45	0
46	4
47	9
48	0
49	0
50	0
51	0
52	0
53	0
54	0
55	0
56	0
57	0
58	0
59	0
60	0
61	0
62	5
63	0
64	0
65	0
66	0
67	0
68	0
69	0
70	0
71	1
72	0
73	0
74	0
75	0
76	7
77	25
78	0
79	0
80	0
81	0
82	0
1	0
2	0
3	0
4	0
5	0
6	0
7	0
8	0
9	0
10	0
11	0
12	0
13	0
14	0
15	0
16	0
17	0
18	0
19	0
20	0
21	0
22	0
23	5
24	1
25	0
26	0
27	0
28	0
29	0
30	0
31	0
32	3
33	0
34	0
35	0
36	0
37	0
38	0
39	0
40	0
41	0
42	0
43	0
44	0
45	0
46	0
47	0
48	0
49	0
50	0
51	28
52	0
53	0
54	0
55	0
56	0
57	0
58	1
59	0
60	14
61	0
62	0
63	2
64	1
65	0
66	0
67	2
68	0
69	0
70	0
71	0
72	2
73	8
74	4
75	0
76	0
77	0
78	2
79	0
80	5
81	1
82	0
83	0
84	3
85	0
86	1
87	0
88	8
89	0
90	0
91	3
92	0
93	0
94	0
1	0
2	0
3	0
4	0
5	0
6	1
7	0
8	0
9	0
10	0
11	0
12	0
13	0
14	0
15	0
16	4
17	8
18	0
19	0
20	0
21	63
22	87
23	2
24	0
25	0
26	0
27	0
28	0
29	1
30	0
31	20
32	0
33	1
34	167
35	5
36	1
37	28
38	2
39	11
40	42
41	0
42	38
43	4
44	0
45	25
46	1
47	2
48	88
49	28
50	9
51	0
52	19
53	1
54	4
55	7
56	22
57	1
58	0
59	6
60	43
61	2
62	1
63	0
64	39
65	14
66	0
67	0
1	0
2	0
3	0
4	0
5	1
6	0
7	0
8	0
9	1
10	9
11	0
12	3
13	8
14	0
15	0
16	0
17	0
18	0
19	0
20	0
21	0
22	0
23	0
24	7
25	0
26	0
27	0
28	3
29	0
30	0
31	0
32	0
33	0
34	7
35	21
36	0
37	0
38	25
39	23
40	0
41	0
42	0
43	0
44	0
45	0
46	0
47	4
48	0
49	35
50	0
51	0
52	0
53	0
54	0
55	76
56	0
57	0
58	0
59	18
60	0
61	8
62	73
63	3
64	0
65	0
66	0
67	0
68	0

## Sheet: PTV
1	1
2	0
3	4
4	65		15.7042
5	0
6	5
7	0
8	0
9	0
10	8
11	8
12	0
13	0
14	0
15	0
16	10
17	0
18	1
19	2
20	0
21	1
22	0
23	0
24	41
25	0
26	0
27	17
28	0
29	1
30	0
31	1
32	53
33	1
34	0
35	12
36	11
37	36
38	0
39	2
40	0
41	6
42	0
43	0
44	0
45	1
46	1
47	14
48	1
49	2
50	20
51	0
52	0
53	3
54	1
55	0
56	5
57	5
58	31
59	17
60	0
61	22
62	41
63	0
64	0
65	39
66	2
67	0
68	6
69	0
70	2
71	1
72	0
73	0
74	5
75	7
76	3
77	1
78	6
79	0
80	8
81	1
82	1
83	16
84	1
85	17
86	0
87	6
88	0
89	0
90	1
91	97
92	0
93	24
94	4
95	51
96	7
97	0
98	10
99	5
101	0
102	19
103	31
104	2
105	17
106	3
107	11
108	2
109	2
110	33
111	0
112	0
113	9
114	0
115	4
116	0
1	6
2	0
3	0
4	0
5	0
6	2
7	19
8	0
9	1
10	0
11	0
12	0
13	5
14	0
15	0
16	29
17	0
18	0
19	0
20	0
21	2
22	0
23	0
24	0
25	0
26	1
27	0
28	0
29	41
30	0
31	34
32	0
33	38
34	1
35	8
36	1
37	8
38	25
39	0
40	21
41	7
42	1
43	2
44	1
45	0
46	1
47	4
48	1
49	10
50	1
51	0
52	0
53	9
54	71
55	0
56	0
57	0
58	0
59	0
60	0
61	0
62	0
63	0
64	0
65	1
66	6
67	1
68	11
69	114
70	0
71	2
72	6
73	0
74	5
75	25
76	0
77	0
78	11
79	0
80	2
81	24
82	0
83	1
84	2
85	1
86	3
1	0
2	0
3	0
4	0
5	0
6	5
7	0
8	0
9	0
10	0
11	0
12	0
13	0
14	0
15	0
16	23
17	9
18	0
19	0
20	1
21	0
22	0
23	0
24	6
25	1
26	0
27	0
28	0
29	0
30	0
31	2
32	79
33	0
34	0
35	0
36	1
37	5
38	1
39	0
40	3
41	5
42	6
43	0
44	2
45	4
46	0
47	1
48	0
49	1
50	4
51	27
52	2
53	0
54	4
55	0
56	0
57	0
58	6
59	2
60	0
61	0
62	0
63	0
64	0
65	0
66	0
1	0
2	27
3	5
4	0
5	0
6	0
7	2
8	55
9	124
10	75
11	9
12	7
13	10
14	26
15	0
16	2
17	10
18	0
19	35
20	2
21	56
22	2
23	33
24	0
25	113
26	0
27	22
28	54
29	0
30	22
31	0
32	0
33	4
34	18
35	7
36	2
37	76
38	7
39	14
40	89
41	1
42	0
43	0
44	0
45	10
46	0
47	0
48	0
49	0
50	0
51	0
52	0
53	0
54	3
55	0
56	0
57	0
58	2
59	2
60	0
1	19
2	5
3	1
4	19
5	1
6	29
7	3
8	1
9	11
10	0
11	0
12	1
13	1
14	0
15	0
16	19
17	1
18	84
19	14
20	1
21	1
22	9
23	73
24	39
25	31
26	6
27	0
28	21
29	12
30	16
31	58
32	26
33	58
34	32
35	3
36	0
37	1
38	18
39	56
40	5
41	55
42	4
43	0
44	6
45	0
46	0
47	0
48	0
49	0
50	17
51	29
52	15
53	296
54	49
55	128
56	0
57	7
58	1
59	6
60	0
61	47
62	1
63	5
64	23
65	0
66	40
67	429
68	61
69	0
70	5
71	0
72	128
73	54
74	0
75	0
76	9
77	34
78	8
79	24
80	142
81	6
82	874
83	35
84	54
85	1
86	10
87	1
88	300
89	95
90	0
91	51
92	4
93	5
94	64
95	96
96	1
97	42
98	0
99	4
100	2
101	28
102	34
1	20
2	0
3	7
4	17
5	34
6	1
7	11
8	6
9	0
10	6
11	46
12	22
13	40
14	0
15	46
16	2
17	0
18	0
19	63
20	0
21	9
22	2
23	0
24	0
25	26
26	2
27	3
28	0
29	38
30	2
31	62
32	1
33	47
34	0
35	2
36	40
37	32
38	223
39	53
40	0
41	95
42	46
43	24
44	0
45	4
46	0
47	0
48	35
49	1
50	4
51	6
52	0
53	0
54	232
55	24
56	13
57	3
58	52
59	38
60	5
61	5
62	98
63	2
64	125
65	2
66	0
67	0
68	20
69	0
70	0
71	0
72	3
73	22
74	1
75	0
76	17
77	0
78	0
79	0
80	14
81	2
82	29
83	15
84	0
85	25
86	83
87	3
88	0
89	13
90	1
91	0
92	13
93	1
94	12
95	2
96	0
97	77
98	19
99	13
100	0
101	0
102	0
103	12
104	9
105	25
106	4
1	16
2	1
3	74
4	35
5	1
6	74
7	6
8	13
9	1
10	0
11	175
12	0
13	22
14	0
15	0
16	3
17	91
18	73
19	0
20	0
21	56
22	31
23	42
24	3
25	23
26	0
27	4
28	1
29	41
30	0
31	6
32	7
33	0
34	2
35	0
36	0
37	5
38	13
39	0
40	0
41	1
42	40
43	0
44	6
45	6
46	0
47	0
48	0
49	0
50	8
51	0
52	1
53	0
54	0
55	0
56	4
57	12
58	0
59	22
60	4
61	3
62	4
63	18
64	2
65	0
66	1
67	0
68	2
69	2
70	14
71	3
72	0
73	0
74	1
75	0
76	0
77	5
78	1
1	39
2	0
3	4
4	0
5	79
6	16
7	64
8	0
9	0
10	51
11	0
12	47
13	14
14	10
15	0
16	43
17	0
18	0
19	15
20	34
21	0
22	1
23	0
24	0
25	0
26	35
27	0
28	0
29	0
30	0
31	0
32	0
33	3
34	2
35	69
36	24
37	71
38	59
39	0
40	4
41	3
42	13
43	78
44	0
45	2
46	44
47	60
48	55
49	13
50	4
51	47
52	89
53	8
54	0
55	0
56	11
57	0
58	1
59	42
60	1
61	1
62	0
1	0
2	0
3	0
4	0
5	14
6	0
7	0
8	0
9	3
10	88
11	0
12	0
13	0
14	0
15	49
16	37
17	0
18	0
19	0
20	0
21	7
22	1
23	2
24	0
25	0
26	0
27	0
28	3
29	0
30	26
31	0
32	12
33	14
34	17
35	0
36	1
37	9
38	0
39	0
40	7
41	0
42	34
43	23
44	0
45	0
46	0
47	1
48	2
49	0
50	0
51	0
52	95
53	2
54	10
55	3
56	77
57	14
58	3
59	129
60	4
61	107
62	0
63	6
64	15
65	33
66	113
67	17
68	27
69	46
70	0
71	2
72	11
73	0
74	0
75	5
76	2
77	0
78	7
79	55
80	0
1	0
2	0
3	0
4	0
5	14
6	0
7	0
8	0
9	3
10	88
11	0
12	0
13	0
14	0
15	49
16	37
17	0
18	0
19	0
20	0
21	7
22	1
23	2
24	0
25	0
26	0
27	0
28	3
29	0
30	26
31	0
32	12
33	14
34	17
35	0
36	1
37	9
38	0
39	0
40	7
41	0
42	34
43	23
44	0
45	0
46	0
47	1
48	2
49	0
50	0
51	0
52	95
53	2
54	10
55	3
56	77
57	14
58	3
59	129
60	4
61	107
62	0
63	6
64	15
65	33
66	113
67	17
68	27
69	46
70	0
71	2
72	11
73	0
74	0
75	5
76	2
77	0
78	7
79	55
80	0

## Sheet: M2PN
1	0
2	0		5.31423
3	0
4	0
5	0
6	0
7	0
8	0
9	0
10	0
11	3
12	0
13	0
14	0
15	0
16	0
17	0
18	12
19	0
20	0
21	0
22	0
23	0
24	0
25	0
26	0
27	0
28	0
29	0
30	0
31	0
32	6
33	0
34	0
35	0
36	0
37	1
38	0
39	0
40	0
41	0
42	0
43	0
44	0
45	0
46	24
47	0
48	0
49	0
50	0
51	2
52	9
53	0
54	0
55	0
56	0
57	0
58	0
59	0
60	0
61	0
62	0
63	0
64	0
65	0
66	12
67	0
68	0
69	0
70	0
71	0
72	0
73	0
74	0
75	0
76	0
77	0
78	0
79	0
80	0
81	0
82	0
83	0
84	0
85	0
86	0
87	0
88	0
89	0
90	0
91	0
92	0
93	0
94	0
95	0
96	0
97	0
98	0
99	0
100	0
101	0
102	0
103	3
104	1
105	0
106	0
107	11
108	0
109	4
110	0
111	0
112	0
113	0
114	0
115	2
116	0
117	1
118	0
119	0
120	0
121	1
122	1
123	0
124	1
125	1
126	0
127	2
128	0
129	0
130	0
131	0
132	0
133	238
134	0
135	0
136	0
137	0
138	0
139	25
140	0
141	0
142	0
143	1
144	0
145	0
146	1
147	0
148	1
149	0
150	0
151	0
152	11
153	0
154	0
155	0
156	0
1	1
2	0
3	1
4	9
5	0
6	0
7	0
8	0
9	1
10	1
11	52
12	0
13	0
14	1
15	0
16	19
17	24
18	0
19	15
20	1
21	23
22	0
23	1
24	0
25	28
26	6
27	0
28	2
29	3
30	3
31	139
32	3
33	0
34	0
35	3
36	1
37	6
38	3
39	2
40	23
41	16
42	0
43	1
44	12
45	1
46	0
47	4
48	31
49	5
50	0
51	10
52	0
53	6
54	4
55	1
56	0
57	1
58	23
59	0
60	356
61	2
62	84
63	1
64	0
1	0
2	0
3	0
4	0
5	0
6	0
7	0
8	0
9	0
10	0
11	0
12	0
13	0
14	0
15	0
16	0
17	0
18	0
19	0
20	0
21	0
22	0
23	1
24	0
25	0
26	0
27	0
28	0
29	0
30	0
31	0
32	0
33	0
34	0
35	0
36	0
37	0
38	0
39	0
40	0
41	0
42	0
43	0
44	0
45	0
46	0
47	0
48	0
49	0
50	0
51	0
52	0
53	0
54	0
55	0
56	0
57	9
58	0
1	4
2	14
3	14
4	1
5	0
6	0
7	1
8	0
9	3
10	0
11	0
12	0
13	0
14	4
15	0
16	0
17	0
18	0
19	0
20	0
21	0
22	3
23	0
24	0
25	19
26	0
27	0
28	0
29	2
30	0
31	57
32	0
33	1
34	0
35	0
36	7
37	0
38	1
39	4
40	8
41	0
42	0
43	0
44	3
45	0
46	1
47	0
48	0
49	13
50	1
51	0
52	0
53	3
54	5
55	0
56	2
57	131
58	1
59	0
60	47
61	0
62	37
63	49
64	0
65	15
66	4
67	1
68	7
69	60
70	0
71	0
72	2
73	0
74	26
75	42
76	1
77	1
78	1
79	1
80	0
81	5
82	3
83	1
84	1
85	24
86	0
87	19
88	1
89	0
90	45
91	166
92	17
93	0
94	1
95	10
96	0
97	1
98	0
99	1
1	0
2	0
3	0
4	0
5	1
6	0
7	0
8	0
9	0
10	0
11	3
12	0
13	3
14	1
15	1
16	0
17	0
18	0
19	0
20	0
21	0
22	0
23	0
24	0
25	82
26	2
27	0
28	3
29	0
30	0
31	2
32	0
33	1
34	0
35	0
36	0
37	1
38	34
39	4
40	1
41	0
42	0
43	0
44	0
45	0
46	1
47	7
48	9
49	27
50	2
51	0
52	0
53	0
54	0
55	0
56	4
57	0
58	1
59	0
60	5
61	0
62	6
63	1
64	0
65	0
66	0
67	1
68	1
69	6
70	0
71	0
72	95
73	41
74	72
75	18
76	150
77	190
78	56
79	1
80	0
81	0
82	0
83	21
84	0
85	0
1	0
2	0
3	0
4	0
5	0
6	0
7	0
8	0
9	0
10	0
11	0
12	0
13	0
14	0
15	0
16	0
17	0
18	0
19	0
20	0
21	0
22	0
23	0
24	0
25	0
26	0
27	0
28	0
29	0
30	0
31	0
32	0
33	0
34	0
35	0
36	0
37	0
38	0
39	0
40	0
41	0
42	0
43	0
44	0
45	0
46	0
47	0
48	0
49	0
50	0
51	0
52	0
53	0
54	0
55	0
56	0
57	0
58	0
59	0
60	0
61	0
62	0
63	0
64	0
65	0
1	0
2	0
3	0
4	0
5	0
6	0
7	0
8	0
9	0
10	0
11	0
12	0
13	0
14	0
15	0
16	0
17	0
18	0
19	0
20	0
21	0
22	0
23	0
24	0
25	0
26	0
27	0
28	0
29	0
30	0
31	0
32	0
33	0
34	0
35	0
36	0
37	0
38	0
39	0
40	0
41	0
42	0
43	0
44	0
45	0
46	0
47	0
48	0
49	0
50	0
51	0
52	0
53	0
54	0
55	0
56	0
57	0
58	0
59	0
60	0
61	0
62	0
63	0
64	0
65	0
66	0
67	0
68	0
69	0
70	0
71	0
72	0
73	0
74	0
75	0
76	0
77	0
78	5
79	0
80	0
81	0
82	0
83	0
84	0
85	0
86	0
87	0
88	0
89	0
90	0
91	0
92	216
93	0
94	0
95	0
96	0
97	0
98	0
99	0
100	0
101	0
102	0
103	0
104	4
105	8
106	0
107	2
108	18
109	2
110	0
111	0
112	1
113	0
114	7
115	0
116	49
117	0
118	0
119	0
120	1
121	0
122	47
123	6
124	0
125	0
126	0
127	8
128	0
129	0
130	1
131	1
132	2
133	0
134	1
135	0
136	0
137	0
138	0
139	0
140	0
141	9
142	94
143	10
144	0
145	0
146	3
147	0
148	0
149	2
150	0
151	0
152	0
153	0
154	0
155	0
156	0
157	1
158	0
159	15
160	0
1	0
2	0
3	1
4	0
5	1
6	0
7	0
8	0
9	0
10	0
11	2
12	0
13	0
14	3
15	0
16	0
17	2
18	3
19	6
20	3
21	1
22	0
23	3
24	3
25	0
26	0
27	0
28	3
29	0
30	0
31	0
32	1
33	0
34	0
35	0
36	1
37	0
38	0
39	1
40	4
41	0
42	0
43	9
44	4
45	0
46	0
47	3
48	0
49	0
50	2
51	0
52	4
53	0
54	1
55	17
56	4
57	1
58	14
59	1
60	15
61	4
62	11
63	9
64	7
65	2
66	7
67	21
68	0
69	15
70	1
71	0
72	3
73	7
74	0
75	5
76	0
77	3
78	1
79	6
80	7
81	28
82	2
83	1
84	7
85	4
86	18
87	26
88	53
89	98
90	131
91	6
92	1
93	9
94	11
95	0
96	42
97	22
98	3
99	45
100	18
101	5
102	29
103	6
104	3
105	1
106	2
107	0
108	1
109	10
110	0
111	4
112	0
1	0
2	0
3	0
4	0
5	0
6	0
7	0
8	0
9	42
10	0
11	0
12	0
13	0
14	0
15	0
16	0
17	0
18	0
19	0
20	0
21	0
22	0
23	0
24	0
25	0
26	0
27	0
28	0
29	0
30	0
31	0
32	0
33	0
34	0
35	0
36	0
37	0
38	0
39	0
40	0
41	0
42	0
43	0
44	0
45	0
46	0
47	0
48	0
49	0
50	0
51	0
52	0
53	0
54	0
55	0
56	0
57	0
58	0
59	0
60	0
61	0
62	0
63	0
64	0
65	0
66	0
67	0
68	0
69	0
70	0
71	0
72	0
73	0
74	0
75	0
76	0
77	0
78	0
79	0
80	0
81	0
82	0
83	0
84	0
85	0
86	0
87	0
88	0
89	0
90	0
91	0
92	0
93	0
94	0
95	0
96	0
97	0
98	1
99	0
100	0
101	0
102	0
103	0
104	0
105	0
106	0
107	0
108	0
109	0
110	0
111	0
112	0
113	0
114	0
115	0
116	0
117	0
118	0
119	0
120	0
121	0
122	0
1	1
2	0
3	0
4	0
5	0
6	0
7	0
8	0
9	0
10	0
11	0
12	5
13	0
14	10
15	0
16	0
17	0
18	0
19	9
20	1
21	0
22	0
23	0
24	13
25	29
26	2
27	1
28	12
29	0
30	5
31	0
32	0
33	12
34	6
35	5
36	3
37	14
38	2
39	16
40	1
41	0
42	45
43	10
44	5
45	20
46	1
47	8
48	22
49	1
50	11
51	0
52	9
53	0
54	2
55	3
56	0
57	5
58	0
59	0
60	5
61	8
62	4
63	21
64	4
65	22
66	8
67	2
68	1
69	7
70	15
71	6
72	5
73	93
74	4
75	24
76	6
77	29
78	7
79	118
80	11
81	20
82	90
83	31
84	63
85	1
86	29
87	10
88	1
89	7
90	2
91	12

## Sheet: M2O1
1	1
2	0
3	3		18.4632
4	0
5	24
6	0
7	14
8	0
9	16
10	0
11	0
12	62
13	108
14	28
15	7
16	22
17	0
18	3
19	6
20	0
21	11
22	54
23	0
24	108
25	280
26	24
27	2
28	13
29	0
30	39
31	66
32	0
33	60
34	0
35	7
1	42
2	5
3	0
4	0
5	5
6	0
7	12
8	92
9	118
10	0
11	52
12	6
13	2
16	1
17	3
18	59
19	35
20	0
21	1
22	1
23	0
24	0
25	1
26	0
27	0
28	23
29	74
30	0
31	2
32	0
33	78
34	0
1	0
2	32
3	0
4	0
5	0
6	0
7	0
8	0
9	6
10	5
11	21
12	47
13	0
14	0
15	7
16	11
17	34
18	0
19	9
20	76
21	0
22	15
23	40
24	6
25	12
26	60
27	75
28	53
29	0
30	0
31	3
32	10
33	3
34	17
35	0
36	0
37	4
38	53
39	0
40	0
41	37
42	86
43	10
44	14
45	170
46	23
47	53
1	0
2	0
3	0
4	1
5	0
6	0
7	0
8	0
9	25
10	0
11	43
12	0
13	3
14	0
15	0
16	6
17	0
18	0
19	0
20	2
21	0
22	0
23	0
24	0
25	0
26	0
27	0
28	8
29	15
30	2
31	348
32	0
33	0
34	0
35	19
36	79
37	0
38	25
1	2
2	10
3	0
4	76
5	21
6	0
7	11
8	0
9	0
10	0
11	0
12	0
13	0
14	0
15	37
16	8
17	47
18	20
19	0
20	0
21	0
22	0
23	0
24	16
25	2
26	0
27	50
28	49
29	28
30	40
31	42
32	27
33	23
34	49
35	66
36	24
37	0
38	0
39	0
40	1
41	1
42	8
43	0
44	22
45	0
46	1
47	0
48	40
49	1
50	0
51	0
52	115
53	61
54	43
1	0
2	23
3	0
4	0
5	0
6	41
7	4
8	0
9	10
10	0
11	47
12	5
13	98
14	0
15	0
16	0
17	30
18	0
19	15
20	10
21	1
22	3
23	3
24	1
25	0
26	3
27	0
28	2
29	30
30	78
31	17
32	0
33	90
34	7
35	0
36	2
37	49
38	0
39	0
40	55
41	0
42	0
1	0
2	0
3	7
4	1
5	0
6	0
7	6
8	0
9	0
10	43
11	1
12	0
13	0
14	27
15	1
16	0
17	7
18	11
19	11
20	0
21	0
22	7
23	0
24	0
25	0
26	0
27	1
28	44
29	0
30	0
31	0
32	0
33	0
34	0
35	0
36	0
37	1
38	45
39	0
40	0
41	52
42	0
43	0
44	2
45	2
46	0
47	37
48	0
49	0
50	0
51	4
52	2
53	2
54	16
55	0
56	8
57	0
58	26
1	4
2	40
3	14
4	0
5	0
6	0
7	1
8	0
9	0
10	0
11	0
12	1
13	0
14	1
15	0
16	0
17	6
18	1
19	0
20	0
21	0
22	2
23	4
24	0
25	0
26	0
27	49
28	24
29	13
30	0
31	48
32	3
33	0
34	0
35	0
36	2
37	0
38	5
39	0
40	0
41	0
42	0
1	0
2	8
3	0
4	0
5	0
6	26
7	2
8	0
9	0
10	0
11	0
12	1
13	4
14	0
15	262
16	2
17	5
18	0
19	12
20	0
21	0
22	39
23	59
24	2
25	0
26	14
27	34
28	4
29	30
30	28
31	1
32	168
33	37
34	77
35	0
36	0
37	31
38	0
39	3
40	11
41	0
42	22
43	65
44	18
45	50
46	17
47	32
48	6
49	37
50	700
51	58
52	0
53	6
54	74
55	0
56	60
57	277
58	57
59	54
60	25
61	2
62	259
63	25
64	3
65	20
66	21
67	37
68	47
69	101
70	0
71	60
72	44
73	6
74	28
75	10
76	3
77	0
78	35
1	0
2	0
3	0
4	48
5	0
6	1
7	0
8	19
9	0
10	0
11	0
12	0
13	0
14	11
15	0
16	109
17	0
18	0
19	0
20	0
21	1
22	0
23	22
24	0
25	0
26	24
27	1
28	4
29	23
30	0
31	0
32	0
33	0
34	25
35	0
36	4
37	0
38	0
39	0
40	0
41	0
42	57
43	2
44	0
45	0
46	13
47	2
48	0
49	0

## Sheet: F2PN
1	15
2	0		14.2777
3	0
4	0
5	0
6	3
7	0
8	1
9	0
10	3
11	0
12	0
13	0
14	0
15	142
16	0
17	0
18	0
19	0
20	0
21	46
22	12
23	0
24	8
25	5
26	0
27	1
28	0
29	1
31	0
32	2
33	1
34	25
35	0
36	4
37	33
38	0
39	24
40	0
41	57
42	5
43	0
44	0
45	6
46	10
47	0
48	21
49	0
50	5
51	0
52	0
53	7
54	13
55	0
56	2
57	0
58	244
59	0
60	0
61	0
1	0
2	1
3	2
4	0
5	0
6	0
7	1
8	0
9	2
10	0
11	5
12	0
13	118
14	3
15	7
16	2
17	0
18	0
19	0
20	0
21	0
22	68
23	0
24	0
25	0
26	0
27	18
28	6
29	28
30	0
31	0
32	0
33	0
34	0
35	9
36	0
37	18
38	0
39	10
40	8
41	15
42	0
1	1
2	0
3	0
4	0
5	124
6	4
7	0
8	0
9	0
10	0
11	74
13	0
14	4
15	2
16	0
17	0
18	1
19	2
20	19
21	3
22	3
23	69
24	0
25	45
26	0
27	0
28	0
29	0
30	0
31	0
32	408
33	3
34	13
35	0
36	12
37	11
38	0
39	0
40	0
41	1
42	53
43	0
44	56
45	4
46	2
47	3
48	4
49	0
50	30
51	0
52	0
53	11
54	5
55	6
56	0
57	34
58	18
59	2
60	0
61	29
62	14
63	43
1	1
2	0
3	0
4	4
5	0
6	0
7	0
8	35
9	0
10	0
11	1
12	0
13	0
14	0
15	0
16	4
17	0
18	1
19	6
20	3
21	0
22	46
23	0
24	106
25	48
26	0
27	3
28	11
29	4
30	12
31	0
32	10
33	0
34	4
35	0
36	12
37	4
38	27
39	18
40	7
41	5
42	0
43	0
44	0
45	40
46	3
47	0
48	61
49	5
50	365
51	2
52	23
53	0
54	0
55	4
56	2
57	21
58	0
59	1
60	0
61	12
62	0
63	0
64	6
65	0
66	0
67	0
68	165
69	1
70	0
71	0
72	0
73	107
74	13
75	42
76	0
77	1
78	0
79	0
80	68
81	131
82	0
83	31
84	0
1	0
2	0
3	0
4	0
5	6
6	0
7	0
8	0
9	0
10	0
11	0
12	0
13	0
14	0
15	0
16	0
17	0
18	0
19	21
20	0
21	0
22	0
23	0
24	1
25	1
26	10
27	0
28	5
29	0
30	1
31	4
32	4
33	0
34	3
35	1
36	9
37	0
38	0
39	52
40	11
41	0
42	11
43	0
44	0
45	26
46	28
47	69
48	2
49	142
50	5
51	0
52	0
53	14
54	1
55	2
56	10
57	0
58	83
59	3
60	46
61	33
62	6
63	67
64	63
65	5
1	0
2	0
3	0
4	0
5	0
6	0
7	35
8	0
9	0
10	0
11	0
12	0
13	0
14	0
15	0
16	0
17	0
18	102
19	0
20	0
21	0
22	0
23	1
24	22
25	35
26	0
27	0
28	0
29	0
30	10
31	0
32	31
33	0
34	0
35	25
36	0
37	0
38	96
39	50
40	24
41	0
42	14
43	0
44	10
45	0
46	28
47	54
48	6
49	132
50	4
51	0
52	108
53	4
54	0
55	77
56	0
57	210
58	50
1	12
2	53
3	0
5	0
6	0
7	30
8	7
9	0
10	0
11	0
12	4
13	0
14	0
15	33
16	0
17	0
18	0
19	18
20	0
21	0
22	67
23	29
24	1
25	0
26	0
27	6
28	0
29	0
30	27
31	0
32	0
33	4
34	0
35	0
36	0
37	0
38	2
39	47
40	0
41	0
42	0
43	0
44	3
45	0
46	2
47	64
48	0
49	2
50	0
51	10
52	0
53	0
54	0
55	0
56	0
57	0
1	0
2	19
3	0
4	1
5	32
6	0
7	0
8	0
9	0
10	25
11	0
12	0
13	29
14	1
15	0
16	0
17	0
18	8
19	16
20	0
21	33
22	59
23	0
24	7
25	0
26	0
27	5
28	6
29	0
30	8
31	0
32	12
33	0
34	4
35	0
36	0
37	1
38	88
39	0
40	1
41	6
42	0
43	0
44	0
45	0
46	5
47	12
48	0
49	9
50	0
51	0
52	0
53	46
54	11
55	0
56	0
57	1
58	0
59	0
60	0
61	0
62	0
63	72
64	35
65	0
66	93
67	44
68	4
69	0
70	119
71	15
72	2
73	0
74	46
75	0
76	2
77	2
78	7
1	0
2	6
3	3
4	0
5	30
6	0
7	0
8	0
9	1
10	0
11	0
12	26
13	60
14	1
15	9
16	28
17	12
18	0
19	0
20	38
21	1
22	41
23	0
24	20
25	37
26	18
27	23
28	21
29	0
30	61
31	5
32	5
33	181
34	34
35	185
36	5
37	102
38	33
39	0
40	2
41	3
42	1
43	45
44	39
45	0
46	5

## Sheet: F2O1
1	4		25.0358
2	0
3	0
4	1
5	0
6	0
7	0
8	0
9	0
10	0
11	0
12	0
13	7
14	16
15	0
16	59
17	0
18	39
19	55
20	3
21	106
22	0
23	0
24	11
25	0
26	62
27	10
28	0
29	1
30	0
31	4
32	98
33	9
34	0
35	111
36	17
37	0
38	0
39	0
40	39
41	0
42	22
43	0
44	62
45	0
46	21
47	0
48	0
49	1
50	0
51	0
52	1
53	0
54	74
55	0
56	109
57	64
58	23
1	19
2	0
3	31
4	283
5	0
7	6
8	116
9	2
10	0
11	96
12	0
15	2
16	182
17	0
19	0
20	4
21	0
22	1
23	31
24	0
25	64
26	0
27	1
28	20
29	15
30	0
31	0
32	0
33	0
34	0
35	0
36	8
37	8
38	0
39	0
40	14
41	4
42	2
43	3
44	1
45	0
46	0
47	471
48	1
49	5
50	8
51	0
52	0
53	1
54	7
55	143
56	1
57	0
58	118
59	17
60	4
61	59
62	110
63	15
64	7
65	73
66	1
67	1
68	37
69	0
70	78
71	202
72	192
73	5
74	22
75	1
76	1
77	103
78	1
79	2
80	38
81	65
82	12
83	37
84	88
85	4
86	3
87	8
88	49
89	11
90	695
91	43
92	71
93	0
94	4
95	38
96	0
97	53
98	13
99	176
100	102
101	45
102	332
103	549
104	31
105	169
106	146
107	0
108	49
109	78
110	12
111	100
112	0
113	21
114	114
115	188
116	189
117	53
118	113
119	127
120	148
121	81
122	38
123	120
1	0
2	9
3	97
4	0
5	0
6	0
7	1
8	3
9	0
10	1
11	18
12	3
13	0
14	14
15	0
16	71
17	5
18	20
19	2
20	171
21	3
22	0
23	1
24	2
25	3
26	118
27	28
28	0
29	0
30	1
31	29
32	1
33	64
34	5
35	23
36	22
37	30
38	0
39	0
40	0
41	146
42	48
43	1
44	1
45	75
46	1
47	0
48	86
49	8
50	11
51	0
52	33
53	209
54	41
55	4
56	6
57	16
58	193
59	0
60	11
61	12
62	1
63	18
64	0
1	0
2	0
3	0
4	13
5	0
6	0
7	0
8	0
9	22
10	4
11	0
12	1
13	0
14	49
15	0
16	35
17	0
18	0
19	0
20	16
21	0
22	3
23	26
24	0
25	9
26	0
27	7
28	0
29	0
30	0
31	6
32	0
33	0
34	12
35	0
36	26
37	3
38	24
39	3
40	1
41	63
42	2
43	20
44	43
45	0
46	0
47	4
48	46
49	6
50	1
51	3
52	67
53	0
54	7
55	13
56	6
57	26
58	0
59	18
60	99
61	57
62	2
63	3
64	12
65	41
1	11
2	1
3	0
4	0
5	7
6	3
7	0
8	0
9	17
10	1
11	0
12	6
13	1
14	0
15	0
16	0
17	1
18	4
19	2
20	0
21	22
22	34
23	0
24	3
25	31
26	0
27	0
28	0
29	0
30	13
31	0
32	37
33	0
34	0
35	0
36	0
37	35
38	2
39	45
40	0
41	1
42	6
43	5
44	0
45	0
46	4
47	38
48	0
49	0
50	14
51	6
52	47
53	16
54	9
55	56
56	2
57	42
58	10
59	110
60	105
61	0
62	46
63	56
64	99
65	0
66	2
67	47
68	0
69	326
70	3
71	15
72	2
73	10
74	11
75	0
76	1
77	3
78	0
79	19
80	0
81	0
82	25
83	3
84	139
85	21
86	0
87	21
88	28
89	7
90	12
91	86
92	1
93	6
94	0
95	0
96	22
97	0
98	2
99	0
100	137
101	22
102	0
103	0
104	9
105	0
106	0
107	23
108	0
109	79
110	3
111	91
112	0
113	257
114	3
115	0
1	37
2	0
3	1
4	62
5	94
6	0
7	14
8	11
9	0
10	0
11	50
12	0
13	0
14	8
15	0
16	181
17	0
18	3
19	0
20	54
21	46
22	0
23	0
24	10
25	4
26	3
27	16
28	12
29	90
30	0
31	80
32	6
33	41
34	1
35	0
36	2
37	4
38	0
39	0
40	1
41	0
42	11
43	2
44	0
45	6
46	5
47	0
48	0
49	25
50	3
51	22
52	11
53	1
54	1
55	3
56	49
57	17
58	105
59	35
60	40
61	46
62	0
63	1
64	6
65	4
66	0
67	0
68	6
69	37
70	4
71	24
72	181
73	18
74	410
75	0
76	7
77	62
78	0
79	123
80	19
81	21
82	87
83	13
84	9
85	33
86	6
87	9
88	171
89	66
90	21
91	0
92	0
93	3
94	44
95	94
96	76
97	0
98	18
1	1
2	0
3	0
4	1
5	7
6	2
7	14
8	1
9	33
10	0
11	81
12	0
13	33
14	6
15	6
16	2
17	0
18	69
19	4
20	52
21	7
22	0
23	10
24	12
25	103
26	18
27	89
28	1
29	33
30	1
31	18
32	49
33	0
34	0
35	1
36	50
37	0
38	18
39	11
40	39
41	1
42	2
43	12
44	0
45	56
46	33
47	51
1	0
2	71
3	68
4	6
5	0
7	0
8	17
9	0
10	0
11	0
12	66
13	49
14	0
15	0
16	18
17	57
18	11
19	0
20	0
21	0
22	0
23	7
24	37
25	1
26	0
27	1
28	0
29	46
30	0
31	0
32	1
33	0
34	78
35	17
36	34
37	0
38	36
39	0
40	0
41	0
42	3
43	78
44	0
45	0
46	2
47	14
48	34
49	4
50	324
51	0
52	4
53	0
54	9
55	37
56	2
57	14
58	0
59	0
60	1
61	12
62	53
63	0
64	0
65	53
66	0
67	1
68	0
69	36
70	0
71	77
72	6
73	1
74	133
75	0
76	22
77	12
78	10
79	4
80	0
81	2
1	12
2	0
3	56
4	0
5	0
6	0
7	0
8	14
9	0
10	0
11	0
12	0
13	14
14	0
15	0
16	0
17	172
18	5
19	27
20	0
21	4
22	0
23	1
24	0
25	0
26	0
27	57
28	0
29	0
30	0
31	22
32	8
33	0
34	19
35	0
36	0
37	0
38	38
39	0
40	0
41	0
42	0
43	69
44	1
45	140
46	0
47	0
48	142
49	0
50	0
51	0
52	57
53	0
54	0
55	0
56	0
57	0
58	0
59	1
60	20
61	8
62	1
63	64
64	14
65	2
66	0
67	1
68	1
69	0
70	24
71	0
72	0
73	2
74	14
75	4
76	0
77	15
78	0
79	5
80	28
81	0
82	6
83	1
84	60
85	0
86	0
87	1
88	0
1	3
2	0
3	0
4	0
5	0
6	0
7	0
8	0
9	0
10	0
11	0
12	0
13	0
14	0
15	0
16	8
17	4
18	0
19	0
20	0
21	10
22	0
23	38
24	2
25	0
26	0
27	0
28	0
29	0
30	81
31	0
32	0
33	46
34	24
35	0
36	15
37	20
38	14
39	1
40	0
41	0
42	2
43	2
44	1
45	37
46	0
47	17
48	0
49	44
50	0
51	39
52	29
53	0
54	0
55	15
56	39
57	4
58	90
59	17
60	2
61	0
62	0
63	63
64	0
65	20
66	3
67	1
68	0
69	135
70	118
71	102
72	11
73	45
74	8
75	62
76	5
