# Supplementary material for: The out-of-field dose in radiation therapy induces delayed tumorigenesis by senescence evasion
Source: eLife. 2022 Mar 18;11:e67190. doi: 10.7554/eLife.67190 (PMC8933005; doi:10.7554/eLife.67190)
Supplement: Figure 4—source data 1. [file elife-67190-fig4-data1.xlsx]

## Sheet: Feuil1
Figure 4-source data 1		XRCC1
Non-irradiated	Total body	0 to +10	+10 to +20
178		167	432
119	186	134	196
106	142	121	181
70	121	66	160
57	112	61	151
54	97	57	138
49	95	49	138
46	88	48	133
42	88	44	129
42	87	44	129
38	83	41	127
37	82	38	121
37	80	37	108
34	77	37	99
33	75	34	99
33	71	34	96
30	64	32	91
29	60	31	91
29	59	30	86
26	52	27	86
25	51	26	84
24	47	26	84
23	47	25	83
22	46	24	80
21	45	22	79
21	44	21	78
19	43	21	77
19	42	21	76
19	42	21	76
18	41	20	74
18	41	19	73
16	39	19	73
15	38	19	71
15	38	19	71
15	37	17	71
14	34	15	71
14	33	15	70
13	32	15	69
13	32	15	69
13	31	15	67
12	31	14	66
12	30	14	66
12	29	14	66
12	29	12	64
11	29	12	64
11	29	11	63
11	28	11	60
11	28	11	59
10	28	11	59
10	27	11	59
10	26	10	58
10	26	10	58
10	26	9	57
10	26	9	57
10	24	9	57
9	24	8	56
9	24	8	56
8	24	8	54
8	24	7	53
8	24	7	53
7	23	7	52
7	23	6	52
7	23	6	52
7	23	6	52
7	22	6	51
6	22	6	50
6	21	6	50
6	20	5	50
5	20	5	50
5	20	5	50
5	20	5	49
5	19	5	48
5	19	5	47
5	19	5	46
5	19	5	46
5	18	4	46
5	18	4	45
4	17	4	45
4	17	4	45
4	17	4	44
4	17	3	43
4	17	3	42
4	17	3	41
4	16	3	41
4	16	3	41
4	16	3	41
4	16	3	40
4	16	3	40
4	15	3	40
4	15	3	40
4	15	3	40
4	15	2	39
4	15	2	39
3	15	2	39
3	14	2	38
3	14	2	38
3	14	2	38
3	13	2	38
3	13	2	38
3	13	2	38
3	13	1	38
3	13	1	37
3	13	1	37
3	12	1	37
2	12	1	36
2	12	1	36
2	12	1	35
2	12	1	35
2	11	1	35
2	11	1	35
2	11	1	35
2	11	1	34
2	11	1	34
2	10	1	34
2	10	1	33
2	10	1	33
2	10	1	33
2	10	1	33
2	10	1	32
2	10	1	32
2	10	1	31
2	10	1	31
2	10	1	31
2	9	1	30
2	9	1	30
2	9	1	30
2	9	1	30
2	9	0	30
2	9	0	30
2	9	0	30
2	9	0	30
2	9	0	30
2	8	0	30
1	8	0	28
1	8	0	28
1	8	0	28
1	8	0	28
1	8	0	28
1	8	0	26
1	8	0	26
1	7	0	26
1	7	0	26
1	7	0	26
1	7	0	25
1	7	0	25
1	7	0	25
1	7	0	25
1	7	0	24
1	6	0	24
1	6	0	24
1	6	0	24
1	6	0	24
1	6	0	23
1	6	0	23
1	6	0	23
1	6	0	23
1	6	0	23
1	6	0	23
0	6	0	23
0	6	0	22
0	6	0	22
0	5	0	22
0	5	0	22
0	5	0	22
0	5	0	22
0	5	0	22
0	5	0	22
0	5	0	21
0	5	0	21
0	5	0	21
0	5	0	21
0	5	0	21
0	5	0	21
0	5	0	20
0	4	0	20
0	4	0	20
0	4	0	20
0	4	0	20
0	4	0	20
0	4	0	20
0	4	0	20
0	4	0	19
0	4	0	19
0	4	0	19
0	4	0	19
0	4	0	19
0	4	0	18
0	4	0	18
0	4	0	18
0	4	0	18
0	4	0	18
0	3	0	18
0	3	0	18
0	3	0	17
0	3	0	17
0	3	0	17
0	3	0	17
0	3	0	17
0	3	0	17
0	3	0	17
0	3	0	17
0	3	0	17
0	3	0	17
0	3	0	16
0	3	0	16
0	3	0	16
0	3	0	16
0	3	0	16
0	3	0	16
0	3	0	16
0	3	0	16
0	3	0	16
0	3	0	16
0	3	0	16
0	3	0	16
0	3	0	15
0	3	0	15
0	3	0	15
0	3	0	14
0	3	0	14
0	2	0	14
0	2	0	14
0	2	0	14
0	2	0	14
0	2	0	14
0	2	0	14
0	2	0	14
0	2	0	14
0	2	0	14
0	2	0	13
0	2	0	13
0	2	0	13
0	2	223	13
0	2	203	13
0	2	155	13
0	2	130	13
0	2	110	13
0	2	102	13
0	2	87	13
0	2	84	13
0	2	83	13
0	2	81	13
0	2	81	13
0	2	74	13
0	2	73	12
0	2	73	12
0	2	72	12
0	2	71	12
0	2	68	12
0	2	67	12
0	2	64	12
0	2	63	12
0	2	63	12
0	1	62	12
0	1	61	12
0	1	60	12
0	1	58	12
0	1	57	12
0	1	55	12
0	1	55	12
0	1	51	12
0	1	50	12
0	1	48	12
0	1	47	11
0	1	47	11
0	1	47	11
0	1	47	11
0	1	46	11
0	1	45	11
0	1	45	11
0	1	44	11
0	1	44	11
0	1	44	11
0	1	42	11
0	1	42	11
0	1	41	11
0	1	41	10
0	1	41	10
0	1	41	10
0	1	40	10
0	1	40	10
0	1	39	10
0	1	36	10
0	1	36	10
0	1	36	10
0	1	36	10
0	1	35	10
0	1	35	9
0	0	34	9
0	0	34	9
0	0	34	9
0	0	34	9
0	0	31	9
0	0	30	9
0	0	30	9
0	0	30	9
0	0	28	9
0	0	28	9
0	0	28	9
0	0	28	9
0	0	28	9
0	0	27	9
0	0	27	9
0	0	26	8
0	0	26	8
0	0	26	8
0	0	26	8
0	0	25	8
0	0	25	8
0	0	25	8
0	0	25	8
0	0	24	8
0	0	24	8
0	0	24	8
0	0	24	8
0	0	24	8
0	0	24	8
0	0	23	8
0	0	23	8
0	0	23	8
0	0	23	8
0	0	22	8
0	0	22	8
0	0	21	8
0	0	21	7
0	0	21	7
0	0	21	7
0	0	21	7
0	0	20	7
0	0	20	7
0	0	20	7
0	0	20	7
0	0	19	7
0	0	19	7
0	0	19	7
0	0	19	7
0	0	19	7
0	0	18	7
0	0	18	7
0	0	18	7
0	0	18	7
0	0	18	7
0	0	18	7
0	0	18	7
0	0	17	7
0	0	17	7
0	0	17	7
0	0	17	6
0	0	17	6
0	0	17	6
0	0	17	6
0	0	17	6
0	0	17	6
0	0	17	6
0	0	16	6
0	0	16	6
0	0	15	6
0	0	15	6
0	0	15	6
0	0	15	6
0	0	15	6
0	0	15	6
0	0	15	6
0	0	15	6
0	0	14	6
0	0	14	6
0	0	14	6
0	0	14	6
0	0	14	6
0	0	14	6
0	0	14	6
0	0	14	6
0	0	14	6
0	0	13	6
0	0	13	6
0	0	13	5
0	0	13	5
0	0	13	5
0	0	13	5
0	0	13	5
0	0	13	5
0	0	12	5
0	0	12	5
0	0	12	5
0	0	12	5
0	0	12	5
0	0	12	5
0	0	12	5
0	0	12	5
0	0	12	5
0	0	12	5
0	0	12	5
0	0	12	5
0	0	12	5
0	0	11	5
0	0	11	4
0	0	11	4
0	0	11	4
0	0	11	4
0	0	11	4
0	0	11	4
0	0	11	4
0	0	11	4
0	0	11	4
0	0	10	4
0	0	10	4
0	0	10	4
0	0	10	4
0	0	10	4
0	0	10	4
0	0	10	4
0	0	10	4
0	0	9	4
0	0	9	4
0	0	9	4
0	0	9	4
0	0	9	4
0	0	9	4
0	0	9	4
0	0	9	4
0	0	8	4
0	0	8	3
0	0	8	3
0	0	8	3
0	0	8	3
0	0	8	3
0	0	8	3
0	0	8	3
0	0	8	3
0	0	8	3
0	0	8	3
0	0	8	3
0	0	7	3
0	0	7	3
0	0	7	3
0	0	7	3
0	0	7	3
0	0	7	3
0	0	7	3
0	0	7	3
0	0	7	3
0	0	7	3
0	0	6	3
0	0	6	2
0	0	6	2
0	0	6	2
0	0	6	2
0	0	6	2
0	0	6	2
0	0	6	2
0	0	6	2
0	0	6	2
0	0	6	2
0	0	6	2
0	0	5	2
	0	5	2
	0	5	2
	0	5	2
	0	5	2
	0	5	2
	0	5	2
	0	5	2
	0	5	2
	0	5	2
	0	5	2
	0	5	2
	0	5	2
	0	5	2
	0	5	2
	0	5	2
		4	2
		4	2
		4	2
		4	1
		4	1
		4	1
		4	1
		4	1
		4	1
		4	1
		4	1
		4	1
		4	1
		4	1
		4	1
		4	1
		4	1
		4	1
		4	1
		4	1
		4	1
		4	1
		4	1
		4	1
		4	1
		3	1
		3	1
		3	1
		3	1
		3	1
		3	1
		3	1
		3	1
		3	1
		3	1
		3	1
		3	1
		3	1
		3	1
		3	1
		3	1
		3	1
		3	1
		3	1
		3	1
		3	1
		3	0
		3	0
		3	0
		3	0
		2	0
		2	0
		2	0
		2	0
		2	0
		2	0
		2	0
		2	0
		2	0
		2	0
		2	0
		2	0
		2	0
		2	0
		2	0
		2	0
		2	0
		2	0
		2	0
		2	0
		2	0
		2	0
		2	0
		2	0
		2	0
		2	0
		2	0
		2	0
		2	0
		2	0
		2	0
		1	0
		1	0
		1	0
		1	0
		1	0
		1	0
		1	0
		1	0
		1	0
		1	0
		1	0
		1	0
		1	0
		1	0
		1	0
		1	0
		1	0
		1	0
		1	0
		1	0
		1	0
		1	0
		1	0
		1	0
		1	0
		1	0
		1	0
		1	0
		1	0
		1	0
		1	0
		1	0
		1	0
		1	0
		1	0
		1	0
		1	0
		1	0
		1	0
		1	0
		1	0
		1	0
		1	0
		1	0
		1	0
		1	0
		1	0
		1	0
		1	0
		1	0
		1	0
		1	0
		1	0
		1	0
		1	0
		1	385
		1	287
		1	151
		1	145
		1	139
		1	108
		0	106
		0	106
		0	100
		0	94
		0	93
		0	92
		0	85
		0	84
		0	80
		0	78
		0	72
		0	57
		0	56
		0	54
		0	53
		0	52
		0	48
		0	46
		0	45
		0	45
		0	42
		0	40
		0	40
		0	39
		0	39
		0	38
		0	38
		0	38
		0	36
		0	36
		0	34
		0	33
		0	32
		0	31
		0	29
		0	28
		0	26
		0	25
		0	23
		0	23
		0	22
		0	22
		0	21
		0	19
		0	19
		0	19
		0	19
		0	17
		0	17
		0	17
		0	17
		0	16
		0	16
		0	15
		0	14
		0	14
		0	14
		0	14
		0	14
		0	13
		0	13
		0	13
		0	13
		0	13
		0	13
		0	12
		0	12
		0	12
		0	12
		0	11
		0	11
		0	10
		0	10
		0	10
		0	10
		0	10
		0	9
		0	9
		0	9
		0	9
		0	9
		0	9
		0	8
		0	8
		0	8
		0	8
		0	8
		0	8
		0	8
		0	8
		0	8
		0	8
		0	7
		0	7
		0	7
		0	7
		0	7
		0	7
		0	7
		0	7
		0	6
		0	6
		0	6
		0	5
		0	5
		0	5
		0	5
		0	5
		0	5
		0	5
		0	5
		0	5
		0	5
		0	5
		0	5
		0	5
		0	5
		0	5
		0	4
		0	4
		0	4
		0	4
		0	4
		0	4
		0	4
		0	4
		0	4
		0	4
		0	4
		0	4
		0	4
		0	4
		0	4
		0	4
		0	4
		0	3
		0	3
		0	3
		0	3
		0	3
		0	3
		0	3
		0	3
		0	3
		0	3
		0	3
		0	3
		0	3
		0	3
		0	3
		0	3
		0	3
		0	3
		0	3
		0	3
		0	3
		0	3
		0	3
		0	3
		0	3
		0	3
		0	2
		0	2
		0	2
		0	2
		0	2
		0	2
		0	2
		0	2
		0	2
		0	2
		0	2
		0	2
		0	2
		0	2
		0	2
		0	2
		0	2
		0	2
		0	2
		0	2
		0	1
		0	1
		0	1
		0	1
		0	1
		0	1
		0	1
		0	1
		0	1
		0	1
		0	1
		0	1
		0	1
		0	1
		0	1
		0	1
		0	1
		0	1
		0	1
		0	1
		0	1
		0	1
		0	1
		0	1
		0	1
		0	1
		0	1
		0	1
		0	1
		0	1
		0	1
		0	1
		0	1
		0	1
		0	1
		0	1
		0	1
		0	1
		0	1
		0	1
		0	1
		0	1
		0	1
		0	1
		0	1
		0	1
		0	1
		0	1
		0	1
		0	1
		0	1
		0	1
		0	1
		0	1
		0	1
		0	1
		0	0
		0	0
		0	0
		0	0
		0	0
		0	0
		0	0
		0	0
		0	0
		0	0
		0	0
		0	0
		0	0
		0	0
		0	0
		0	0
		0	0
		0	0
		0	0
		0	0
		0	0
		0	0
		0	0
		0	0
		0	0
		0	0
		0	0
		0	0
		0	0
		0	0
		0	0
		0	0
		0	0
		0	0
		0	0
		0	0
		0	0
		0	0
		0	0
		0	0
		0	0
		0	0
		0	0
		0	0
		0	0
		0	0
		0	0
		0	0
		0	0
		0	0
		0	0
		0	0
		0	0
		0	0
		0	0
		0	0
		0	0
		0	0
		0	0
		0	0
		0	0
		0	0
		0	0
		0	0
		0	0
		0	0
		0	0
		0	0
		0	0
		0	0
		0	0
		0	0
		0	0
		0	0
		0	0
		0	0
		0	0
		0	0
		0	0
		0	0
		0	0
		0	0
		0	0
		0	0
		0	0
		0	0
		0	0
		0	0
		0	0
		0	0
		0	0
		0	0
		0	0
		0	0
		0	0
		0	0
		0	0
		0	0
		0	0
		0	0
		0	0
		0	0
		0	0
		0	0
		0	0
		0	0
		0	0
		0	0
		0	0
		0	0
		0	0
		0	0
		0	0
		0	0
		0	0
		0	0
		0	0
		0	0
		0	0
		0	0
		0	0
		0	0
		0	0
		0	0
		0	0
		0	0
		0	0
		0	0
		0	0
		0	0
		0	0
		0	0
		0	0
		0	0
		0	0
		0	0
		0	0
		0	0
		0	0
		0	0
		0	0
		0	0
		0	0
		0	0
		0	0
		0	0
		0	0
		0	0
		0	0
		0	0
		0	0
		0	0
		0	0
		0	0
		0	0
		0	0
		0	0
		0	0
		0	0
		0	0
		0	0
		0	0
		0	0
		0	0
		0	0
		398	0
		396	0
		337	0
		327	0
		268	0
		241	0
		221	0
		201	0
		175	0
		145	0
		138	0
		135	0
		131	0
		122	0
		122	0
		116	0
		107	0
		104	0
		103	0
		99	0
		98	0
		95	0
		94	0
		94	0
		93	0
		92	0
		91	0
		91	0
		89	0
		88	0
		86	0
		86	0
		84	0
		79	0
		79	0
		78	0
		78	0
		77	0
		76	0
		74	0
		74	0
		72	0
		72	0
		70	0
		68	0
		67	0
		66	0
		65	0
		64	0
		64	0
		63	0
		61	0
		60	0
		59	0
		59	0
		58	0
		58	0
		58	0
		57	0
		56	0
		54	0
		53	0
		52	0
		52	0
		52	0
		51	0
		51	0
		50	0
		50	0
		50	0
		48	0
		48	0
		47	0
		47	0
		47	0
		47	0
		44	0
		42	0
		42	0
		41	0
		41	0
		40	0
		40	0
		39	0
		39	0
		38	0
		38	0
		36	0
		36	0
		35	0
		35	0
		35	0
		35	0
		34	0
		34	0
		34	0
		33	0
		33	0
		32	0
		32	0
		32	0
		32	0
		32	0
		31	66
		31	59
		31	58
		30	43
		30	35
		29	24
		29	21
		29	20
		29	17
		29	13
		28	11
		28	11
		28	10
		27	8
		27	8
		27	6
		26	6
		26	6
		25	4
		25	4
		25	4
		25	4
		24	4
		24	3
		24	3
		23	3
		23	3
		22	2
		22	2
		22	2
		22	2
		22	2
		21	2
		21	2
		21	1
		21	1
		21	1
		20	1
		20	1
		20	1
		20	1
		20	0
		19	0
		19	0
		19	0
		19	0
		18	0
		18	0
		18	0
		18	0
		18	0
		18	0
		17	0
		17	0
		17	0
		16	0
		16	0
		16	0
		16	0
		16	0
		16	0
		16	0
		16	0
		16	0
		16	0
		15	0
		15	0
		15	0
		15	0
		15
		15
		14
		14
		14
		14
		14
		13
		13
		12
		12
		12
		12
		11
		11
		11
		11
		11
		11
		10
		10
		10
		10
		10
		10
		10
		10
		10
		10
		9
		9
		9
		9
		9
		9
		9
		9
		9
		9
		8
		8
		8
		8
		8
		8
		8
		8
		8
		8
		8
		8
		8
		8
		7
		7
		7
		7
		7
		7
		7
		7
		7
		7
		7
		7
		7
		7
		6
		6
		6
		6
		6
		6
		6
		6
		6
		6
		6
		5
		5
		5
		5
		5
		5
		5
		5
		5
		5
		5
		5
		5
		5
		5
		4
		4
		4
		4
		4
		4
		4
		4
		4
		4
		4
		4
		4
		4
		4
		4
		4
		4
		4
		4
		4
		3
		3
		3
		3
		3
		3
		3
		3
		3
		3
		3
		3
		3
		3
		3
		3
		3
		3
		3
		3
		3
		3
		3
		3
		3
		3
		3
		3
		3
		3
		2
		2
		2
		2
		2
		2
		2
		2
		2
		2
		2
		2
		2
		2
		2
		2
		2
		2
		2
		2
		2
		2
		2
		2
		2
		2
		2
		1
		1
		1
		1
		1
		1
		1
		1
		1
		1
		1
		1
		1
		1
		1
		1
		1
		1
		1
		1
		1
		1
		1
		1
		1
		1
		1
		1
		1
		1
		1
		1
		1
		1
		1
		1
		1
		1
		1
		1
		1
		1
		1
		1
		1
		1
		1
		1
		1
		1
		1
		1
		1
		0
		0
		0
		0
		0
		0
		0
		0
		0
		0
		0
		0
		0
		0
		0
		0
		0
		0
		0
		0
		0
		0
		0
		0
		0
		0
		0
		0
		0
		0
		0
		0
		0
		0
		0
		0
		0
		0
		0
		0
		0
		0
		0
		0
		0
		0
		0
		0
		0
		0
		0
		0
		0
		0
		0
		0
		0
		0
		0
		0
		0
		0
		0
		0
		0
		0
		0
		0
		0
		0
		0
		0
		0
		0
		0
		0
		0
		0
		0
		0
		0
		0
		0
		0
		0
		0
		0
		0
		0
		0
		0
		0
		0
		0
		0
		0
		0
		0
		0
		0
		0
		0
		0
		0
		0
		0
		0
		0
		0
		0
		0
		0
		0
		0
		0
		0
		0
		0
		0
		0
		0
		0
		0
		0
		0
		0
		0
		0
		0
		0
		0
		0
		0
		0
		0
		0
		0
		0
		0
		0
		0
		0
		0
		0
		0
		0
		0
		0
		0
		0
		0
		0
		0
		0
		0
		0
		0
		0
		0
		0
		0
		0
		0
		0
		0
		0
		0
		0
		0
		0
		0
		0
		0
		0
		0
		0
		0
		0
		0
		0
		0
		0
		0
		0
		0
		0
		0
		0
		0
		0
		0
		0
		0
		0
		0
		0
		0
		0
		0
		0
		0
		0
		0
		0
		0
		0
		0
		0
		0
		0
		0
		0
		0
		0
		0
		0
		0
		0
		0
		0
		0
		0
		0
		0
		0
