# Supplementary material for: The out-of-field dose in radiation therapy induces delayed tumorigenesis by senescence evasion
Source: eLife. 2022 Mar 18;11:e67190. doi: 10.7554/eLife.67190 (PMC8933005; doi:10.7554/eLife.67190)
Supplement: Figure 4—source data 3. [file elife-67190-fig4-data3.xlsx]

## Sheet: Feuil1
Figure 4-source data 3
53BP1	Non-irradiated	Total body	0 to +10	+10 to +20
	0	0	0	0
	0	0	0	0
	0	0	0	0
	0	3	0	0
	0	0	0	0
	0	14	0	0
	0	1	0	0
	0	12	0	2
	0	4	0	0
	0	7	0	0
	0	3	0	0
	0	0	0	0
	0	1	0	1
	0	16	0	2
	0	0	0	0
	0	8	0	0
	0	9	0	0
	0	0	0	0
	0	4	0	0
	0	1	0	0
	0	3	0	5
	0	15	0	0
	0	9	0	0
	0	1	0	1
	0	0	0	0
	0	7	0	0
	0	0	0	0
	0	12	0	0
	0	11	0	0
	0	3	0	0
	0	1	0	0
	0	0	0	0
	0	1	0	0
	0	5	0	0
	0	5	0	0
	0	0	0
	0	0	0	0
	0	0	1	0
	0	0	0	0
	0	12	0	0
	0	11	1	0
	0	0	0	0
	0	9	0	0
	0	9	0	0
	0	46	0	0
	0	4	0	0
	0	0	0	0
	0	0	0	0
	0	5	0	0
	0	3	0	0
	0	11	0	0
	0	0	6	0
	0	2	0	0
	0	1	0	0
	0	6	0	0
	0	0	0	0
	0	0	0	0
	0	0	0	0
	0	0	0	0
	0	0	0	0
	0	3	0	0
	0	6	0	0
	0	17	0	0
	0	1	0	0
	0	0	0	0
	0	0	0	0
	0	0	0	0
	0	12	0	0
	0	0	0	0
	0	9	0	0
	0	0	12	0
	0	0	0	1
	0		0	0
	0	0	0	0
	0	0	0	0
	0	0	0	0
	0	0	0	0
	0	7	0	0
	0	19	0	0
	0	0	0	0
	0	0	0	0
	1	0	0	0
	0	0	0	0
	0	0	0	0
	0	2	0	0
	0	8	1	0
	0	0	0	0
	0	4	0	0
	0	1		0
	0	1	0	0
	0	51	0	0
	1	3	22	0
	0	0	0	0
	0	0	0
	0	3	0	0
	0	0	1	0
	0	0	0	0
	0	0	0	0
	0	2	0	0
	0	0	0	0
	0	4	0	0
	0	0	5	0
	0	2	0	0
	0	1	0	0
	0	1	0	0
	0	19	0	0
	0	0	0	0
	1	2	0	0
	0	0	0	0
	0	1	0	0
	0	0	0	0
	0	0	0	0
	0	0	0	0
	0	0	0	0
	0	0	0	0
	0	0	0	0
	0	0	0	0
	0	3	9	0
	0	0	9	0
	0	0	0	0
	0	0	0	0
	0	5	0	0
	0	3	0	0
	0	0	0	0
	0	6	0	0
	0	4	0	0
	0	0	0	0
	0	0	0	0
	0	9	1	0
	0	0	0	0
	0	0	0	0
	0	0	3	0
	0	0	0	0
	0	0	0	0
	0	0	0	0
	0		0	0
	0	20	0
	0	5	0	0
	0	12	0	0
	0	5	0	0
	0	0	0	0
	0	3	0	0
	0	0	0	0
	0	1	0	0
	0	4	1	0
	0	13	0	0
	0	0	0	0
	0	2	0	0
	0	1	0	0
	0	37	1	0
	0	1	0	0
	0	6	0	0
	0	0	0	0
	0	2	0	0
	0	0	0	0
	0	24	0	0
	0	0	0
	0	2	0	0
	0	0	2	0
	0	10	0	0
	0	0	0	0
	0	20	1	0
	0	29	0	0
	0	2	0	0
	0	9	0	0
	0	1	0	0
	0	25	0	0
	0	22	0	0
	0	30	0	0
	0	1	1	0
	0	11	0	0
	0	0	0	0
	0	0	0	0
	0	7	0	0
	0	0	3	0
	0	6	0	0
	0	0	0	0
	0	0	0	0
	0	14		0
	0	0	1	0
	0	0	0	0
	0	0	0	0
	0	1	3	0
	0	9	0	0
	0	0	0	0
	0	0	0	0
	0	0	0	0
	0	16	0	0
	0	5	0	0
	0	2	0	0
	0	2	0	0
	0	0	0	0
	0	0	0	0
	0	2	0	0
	0	8	0	0
	0	1	0	0
	0	17	0	0
	0	10	0	0
	0	0	0	0
	0	8	0	0
	0	1		0
	0	3	0	0
	0	0	1	0
	0	5	0	0
	0	14	0	0
	0	0	1	0
	0	0	0	0
	0	0	13	1
	0	4	0	0
	0	7	0	0
	0	0	0	0
	0	1	9	0
	0	0	1	0
	0	0	3	0
	0	0	0	0
	0	11	0	0
	0	0	0	0
	0	13	0	0
	0	0	0	0
	0	2	0	0
	0	18	0	0
	0	0	0	0
	0	0	5	0
	0	0	0	0
	0	0	0	0
	0	0	0	0
	0	0	0
	0	0	0	0
	0	4	0	0
	0	0	1	0
	0	16		0
	0	0	0	0
	0	1	0	0
	0	0	0	0
	0	0	0	0
	0	0	0	0
	0	1	0	0
	0	6	0	0
	0	21	0	0
	0	42	0	0
	0	0	0	0
	0	43	0	0
	0	10	0	0
	0	32	0	0
	0	0	0	0
	0		0	0
	0	1	0	0
	0	1	0	0
	0	0	0	0
	0	1	0	0
	0	0		0
	0	0	0	0
	0	3	0	0
	0	0	0	0
	0	6	0	0
	0	16	0	0
	0	24	0	0
	0	12	0	0
	0	25	0	0
	0	0	0	0
	0	5	0	0
	0	26	0	0
	0	13	0	0
	0	1	0	0
	0	36	0	0
	0	0	0	0
	0	1	0	0
	0	1	0	0
	0	0	0	0
	0	0	0	0
	0	17	0	0
	0	8	0	0
	0	1	0	0
	3	5	1	0
	0	0	4	0
	0	6		0
	0	0	0	0
	0	19	0	0
	0	0	0	0
	0	1	0	0
	2	0	0	0
	0	0	0	0
	0	0	0	0
	0	5	0	0
	0	5	0	0
	0	0	0	0
	0	6	0	0
	0	2	0	0
	0	0	0	0
	0	3	0	0
	0	6	0	0
	0	0	0	0
	0	7	0	0
	0	34	1	0
	0	44	0	0
	1	20	1	0
	13	3	1	0
	0	8	0	0
	0	0	0	0
	0	0	1	0
	0	2	0	0
	1	0	0	0
	0	0	0	0
	1	1	0	0
	0	0	1	0
	0	13	0	0
	0	10	0	0
	0	4	1	0
	0	0	0	0
	0	0	0	0
	0	1	0	0
	0	4	0	0
	0	14	0	0
	1	1	0	0
	0	0	0	0
	2	10	0	0
	0	29	0	0
	0	1	0	0
	1	7	0	0
	0	1	0	0
	0	3	0	0
	0	13	0	0
	0	4	1	0
	0	0	0	0
	0	0	0	0
	0	0	0	0
	0	20	0	0
	0	2	1	0
	0	0	0	0
	0	0	0	0
	0	0	0	0
	0	0	0	0
	0	23		0
	0	0	0	0
	0	0	6	0
	0	4	0	0
	0	0	0	0
	0	1	0	0
	0	0	0	0
	0	0	0	0
	0	0	3	0
	0	0	0	0
	0	0	0	0
	0	1	0	0
	0	7	0	0
	0	0	0
	0	0	0	0
	0	23	0	0
	0	0	0	0
	0	0	0	0
	0	2	0	0
	0	0	0	0
	0	8	0	0
	0	12	0	0
	0	0	0	0
	0	0	0	0
	0	0	0	0
	2	1	0	0
	0	0	0	0
	0	0	0	0
	0	0	0	0
	0	1	4	0
	0	10	0	0
	0	3	0	0
	0	5	0	0
	0	1	0	0
	0	0	0	0
	1	0	0	0
	2	14	0	0
	0	0	0	0
	0	0	0	0
	0	0	0	0
	0	17	0	0
	0	2	0	0
	2	1	0	0
	1	28	0	0
	0	5	0	0
	17	0	0	0
	2	0	0	0
	33			0
	1		0	0
	0		0	0
	0		0	0
	1		0	0
	0		0	0
	1		0	0
	5		0	0
	0		0	0
	18		0	0
	0		0	0
	0		0	0
	3		0	0
	1		0	0
	0		0	0
	0		0	0
	0		0	0
	0		0
	1		0	0
	0		0	0
	0		0	0
	0		0	0
	0		0	0
	0		0	0
	0		5	0
	0		0	0
	0		0	0
	0		0	0
	0		0	0
	0		0	0
	0		0	0
	0		0	0
	0		0	0
	0		0	0
	0		0	0
	1		0	0
	0		0	0
	0		0	0
	2		0	0
	0		0	0
	0		0	0
	0		0	0
	0		0	0
	1		0	0
	3		0	0
	0		0	0
	4		0	0
	4		0	0
	1		0	0
	0		0	0
	0		0	0
	0		0	0
	0		0	0
	0		0	0
	0		0	0
	0		0	0
	0		0	0
	0		0	0
	0		0	0
	0		0	0
	3		0	0
	0		0	0
	0		0	0
	0		0	0
	0		0	0
	0		0	0
	0		0	0
	0		0	0
	0		0	0
	0		0	0
	0		0	0
	0		0	0
	0		0	0
	0		0	0
	0		0	0
	1		0	0
	0		0	0
	0		0	0
	0		1	0
	0		0	0
	0		2	0
	0		0	0
	0		0	0
	0		0	0
	0		0	0
	0		0	0
	0		0	0
	0		0	0
	0		0	0
	0		0	0
	0		0	0
	0		0	0
	0		0	0
	0		0	0
	0		1	0
	0		0	0
	0		0	0
	0		2	0
	0		0	0
	0		0	0
	0		0	0
	0		0	0
	0		0	0
	1		0	0
	0		0	0
	0		0	0
	0		1	0
	0		0	0
	0		0	0
	0		1	0
	0		0	0
	0		0	0
	0		0	0
	0		0	0
	0		2	0
	0		0	0
	0		0	0
	0		0	0
	0		0	0
	0		2	0
	0		0	0
	0		0	0
	0		0	0
	0		0	0
	5		0	0
	0		0	1
	1		0	0
	0		0	0
	0		0	0
	0		0	0
	0		0	0
	0		2	0
	0		0	0
	19		0	0
	0		0	0
	0		0	0
	0		1	0
	0		0	0
	0		0	0
	0		0	2
	1		0	0
	0		0	0
	0		0	0
	1		0	0
	1		0	2
	1		0	0
	0		3	0
	0		0	0
	0		0	0
	0		0	0
	0		0	0
	0		0	0
	0		0	0
	0		3	0
	0		0	1
	0		1	0
	11		0	0
	0		0	0
	0		4	0
	0		0	0
	0		1	0
	0		0	0
	2		0	0
	0		0	0
	0		0	0
	0		0	0
	9		0	0
	0		5	0
	0		0	0
	0		0	0
	1		0	0
	0		0	0
	0		0	0
	0		2	0
	0		0	0
	0		0	0
	0		0	0
	0		0	0
	0		0	0
	0		0	0
	7		0	0
	0		0	0
	2		0	0
	6		0	0
	0		2	0
	1		0	0
	0		7	0
	0		0	0
	0		0	0
	2		0	0
	0		0	0
	1		1	0
	1		0	0
	0		0	0
	0		0	0
	0			0
	0		0	0
	0		0	0
	6		0	0
	0		0	0
			0	0
			0	0
			0	0
			0	0
			0	0
			0	0
			0	0
			0	0
			0	0
			0	0
			0	0
			0	0
			0	0
			0	1
			0	0
			0	0
			0	0
			0	0
			0	4
			0	0
			0	0
			0	0
			0	0
			0	0
			0	0
			0	0
			0	0
			0	0
			0	0
			0	0
			0	0
			0	0
			0	0
			0	0
			0	0
			0	0
			0	0
			0	0
			0	0
			0	37
			0	0
			0	0
			0	0
				0
			0	0
			0	0
			4	0
			0	0
			0	0
			0	0
			2	0
			0	0
			0	0
			0	0
			0	0
			0	0
			0	0
			0	0
			0	0
			1	0
			4	0
			0	0
			0	0
			0	0
			0	0
			2	0
			0	0
			0	0
			0	0
			7	0
			1	0
			0	0
			6	0
			8	0
			0	0
			1	0
			0	0
			0	0
			0	0
			0	0
			0	0
			0	0
			0	0
			0	0
			0	0
			0	0
			0	0
			0	0
			0	0
			0	0
			0	0
			0	0
			0	0
			0	0
			0	0
			0	0
			0	0
			0	0
				0
			0	1
			0	0
			0	2
			0	0
			0	0
			0	0
			0	0
			0	0
			0	0
			0	0
			0	0
			0	9
			0	0
			0	0
			0	0
			0	0
			0	0
			0	0
				0
			0	0
			0	0
			0	0
			0	0
			0	0
			0	0
			0	0
			0	0
			0	0
			0	0
			0	0
			0	0
			0	0
			0	0
			0	0
			0	0
			0	0
			0	0
			0	0
			0	0
			5	0
			3	0
			3	0
			1	0
			0	0
			0	0
			0	0
			0	0
			0	0
			0	0
			0	0
			0	0
			0	0
			0	0
			0	0
			0	0
			0	0
			0	0
			0	0
			0	0
			0	0
			0	0
			0	0
			0	1
			0	0
			0	0
			0	0
			0	0
			0	0
			0	0
			0	0
			0	0
			0	0
			0	0
			0	0
			0	0
			0	0
			0	0
			0	0
				0
			5	0
			2	0
			0	0
			0	0
			0	0
			0	0
			3	0
			0	0
			0	0
				0
			0	0
			0	0
			0	0
			0	0
			0	0
			0	0
			0	0
			0	0
			0	0
			0	0
			22	0
			0	0
			0	1
			0	0
			0	0
			1	0
			0	0
			0	0
			0	0
			0	0
			0	0
			0	0
			1	0
			0	0
			0	0
			0	0
			0	0
			0	0
			0	0
			0	0
			0	0
			0	0
			0	1
			0	0
			0	0
			0	0
			0	0
			0	0
			0	0
			0	0
			0	0
			0	0
			0	0
			0	0
			1	0
			0	0
			0	0
			0	0
			0	0
			1	0
			0	0
			3	0
			0	0
			0	0
			4	0
			0	1
			0	0
			0	0
			0	0
			0	0
			0	3
			0	0
			0	0
			0	0
			0	0
			0	1
			0	0
			0	0
			1	0
			0	0
			0	0
			0	0
			0	0
			1	0
			0	0
			0	1
			0	2
			0	0
			0	0
			0	1
			0	0
			0	1
			0	0
			0
			0	0
			0	0
			0	0
			0	0
			2	0
			1	0
			0	0
				0
			1	0
			2	0
			0	0
			0	0
			0	0
			0	0
			0	0
			0	0
			0	0
			1	0
			0	0
			0	0
			1	0
			0	0
			0	0
			0	0
			0	0
			0	0
			0	0
			0	0
			0
			2	0
			1	0
			0	0
			0	0
			0	0
			0	0
			0	0
			0	0
			0	0
			0	0
			0	0
			0	0
			0	0
			0	0
			0	0
			0	0
			0	0
			0	0
			0	0
			1	0
			0	0
			0	0
			0	0
			0	0
			0	0
			0	0
			0
			3	0
			0	0
			0	0
			0	0
			0	0
			0	0
			0	0
			0	0
			0	12
			3	0
			0	0
			0	0
			4	0
			1	0
			0	0
			6	0
			0	0
			0	0
			0	0
			5	0
			0	0
			0	0
			0	0
			0	0
			0	0
			0	0
			0	0
			0	0
			3	0
			0	0
			0	0
			0	0
			0	0
			0	0
			0
			0	8
			0	0
			0	0
			0	0
			0	0
			0	0
			0	0
			0	0
			0	0
			0	0
			0	0
			0	0
			0	0
			0	0
			0	0
				0
			0	0
			0	0
			0	0
			0	0
			0	0
			0	0
			0	0
			0	0
			0	0
			0	0
			0	0
			0	0
			0	0
			0	0
			0	0
			0
			0	2
			0	0
			0	0
			0	0
			0	0
			0	0
			0	0
			0	0
			0	0
			0	0
			0	1
			0	0
			0	7
			3	0
			0	0
			0	0
			0	0
			0	0
			0	0
			6	0
			2	0
			0	0
			0	0
			0	0
			0	0
			0	1
			0	1
			5	0
			0	0
			0	0
			0	0
			0	0
			0	5
			0	0
			0	0
			0	0
			0	0
			0	0
			0	1
			0	0
			0	0
			0	11
			0	0
			6	0
			0	0
			0	0
			0	0
			0	0
			0	0
			0	1
			0	0
			0	0
			0	0
			0	0
			0	0
			0	0
			0	0
			0	0
			0	0
			0	0
			1	0
			0	0
			0	0
			2	0
			0
			0
			0
			0
			0
			0
			0
			0
			0
			0
			0
			0
			0
			0
			0
			0
			1
			0
			0
			0
			0
			0
			0
			0
			0
			2
			0
			0
			4
			0
			0
			0
			2
			5
			0
			1
			0
			0
			0
			0
			0
			0
			0
			0
			0
			0
			0
			0
			0
			0
			0
			0
			0
			0
			0
			0
			0
			0
			0
			0
			0
			0
			0
			0
			0
			0
			0
			0
			0
			0
			0
			0
			0
			0
			0
			0
			0
			0
			0
			0
			0
			0
			0
			0
			0
			0
			0
			0
			0
			0
			0
			0
			0
			0
			0
			0
			0
			0
			0
			0
			0
			0
			0
			0
			0
			0
			0
			0
			0
			0
			0
			0
			0
			0
			0
			0
			0
			0
			0
			0
			0
			0
			0
			0
			0
			0
			0
			0
			0
			0
			0
			0
			0
			0
			0
			0
			0
			0
			0
			0
			0
			0
			0
			0
			0
			0
			0
			0
			0
			0
			0
			0
			0
			0
			0
			0
			0
			0
			0
			0
			0
			0
			0
			0
			0
			0
			0
			0
			0
			0
			0
			0
			0
			0
			0
			0
			0
			0
			0
			0
			0
			0
			0
			0
			0
			0
			0
			0
			0
			0
			0
			0
			0
			0
			0
			0
			0
			0
			0
			0
			0
			0
			0
			0
			0
			0
			0
			0
			0
			0
			0
			0
			0
			0
			0
			0
			0
			0
			0
			0
			0
			0
			0
			0
			0
			0
			0
			0
			1
			0
			0
			0
			0
			0
			0
			0
			0
			0
			0
			0
			0
			0
			0
			0
			0
			0
			0
			0
			0
			0
			0
			0
			0
			0
			0
			0
			0
			0
			0
			0
			0
			0
			0
			0
			0
			0
			0
			0
			0
			0
			0
			0
			0
			0
			0
			0
			0
			0
			0
			0
			0
			0
			0
			0
			0
			0
			0
			0
			0
			1
			0
			0
			0
			1
			0
			0
			0
			0
			0
			0
			0
			0
			0
			0
			0
			0
			0
			0
			0
			0
			0
			1
			0
			0
			0
			0
			0
			0
			0
			0
			0
			1
			2
			2
			0
			0
			2
			0
			0
			0
			1
			0
			0
			0
			0
			0
			1
			1
			1
			0
			0
			1
			0
			0
			1
			0
			0
			0
			0
			0
			0
			1
			0
			0
			0
			0
			0
			0
			0
			0
			0
			0
			0
			0
			0
			0
			0
			0
			0
			0
			0
			0
			0
			0
			0
			0
			0
			0
			0
			0
			0
			3
			0
			1
			0
			0
			0
			0
			0
			0
			0
			2
			0
			1
			2
			6
			0
			0
			2
			0
			0
			0
			0
			0
			0
			0
			0
			0
			0
			0
			0
			0
			0
			0
			0
			0
			0
			0
			0
			0
			0
			2
			1
			1
			0
			0
			1
			1
			1
			0
			1
			0
			2
			0
			1
			0
			0
			0
			0
			0
			0
			0
			0
			0
			1
			0
			0
			0
			0
			0
			0
			0
			0
			0
			0
			0
			0
			0
			0
			1
			0
			0
			0
			0
			0
			0
			0
			0
			0
			0
			0
			0
			0
			0
			0
			2
			0
			0
			0
			0
			0
			0
			0
			1
			0
			0
			0
			1
			0
			0
			0
			0
			0
			0
			0
			2
			0
			0
			0
			2
			1
			0
			0
			0	0
			5	0
			44	0
			0	0
			4	0
			2	0
			2	0
			6	0
			0	0
			0	1
			1	0
			0	0
			0	0
			3	0
			4	0
			5	0
			4	0
			3	0
			5	0
			5	0
			6	0
			7	0
			6	0
			4	0
			9	0
			1	5
			0	0
			0	0
			0	7
			0	0
			4	1
			3	3
			0	0
			0	0
			4	0
			0	51
			0	16
			5	0
			0	0
			1	0
			4	2
			2	12
			2	0
			22	4
			7	0
			4	7
			0	0
			0	0
			0	3
			12	1
			0	2
			0	0
			0	0
			0	16
			0	1
			0	0
			0	1
			0	1
			0	0
			0	0
			14	2
			0	0
			0	1
			0	0
			0	0
			1	7
			0	6
			1	0
			0	0
			0	0
			2	0
			0	8
			0	0
			0	0
			1	1
			0	0
			0	0
			0	0
			0	0
			0	0
			0	0
			0	0
			0	0
			1	0
			0	0
			0	0
			1	0
			0	0
			0	0
			0	0
			0	0
			0	0
			0	0
			0	0
			0	0
			0	17
			0	0
			0	0
			0	0
			0	0
			0	0
			1	0
			0	0
			0	0
			0	2
			0	2
			1	0
			0	0
			8	0
			0	0
			0	0
			4	0
			0	0
			0	0
			1	0
			0	0
			0	0
			0	0
			0	0
			0	0
			1	0
			0	0
			0	0
			0	0
			0	0
			0	0
			2	0
			0	0
			0	0
			0	0
			0	0
			1	0
			0	0
			0	0
			0	0
			0	0
			0	2
			0	0
			0	0
			0	12
			0	0
			0	1
			0	7
			0	1
			0	0
			0	3
			1	0
			1	0
			0	0
			0	0
			0	0
			1	0
			0	0
			1	0
			0	0
			1	0
			0	0
			0	5
			0	0
			0	0
			5	0
			0	0
			1	0
			0	0
			0	0
			0	0
			0	0
			0	8
			0	0
			0	0
			0	0
			0	0
			4	0
			0	1
			0	0
			0	0
			1	0
			0	0
			1	0
			2	0
			1	0
			0	0
			1	0
			0	0
			0	0
			1	0
			1	0
			0	0
			3	0
			0	0
			5	1
			0	0
			0	0
			3	0
			0	0
			0	0
			1	0
			1	0
			0	0
			0	0
			0	0
			0	1
			0	0
			0	0
			0	0
			0	9
			0	0
			0	0
			0	0
			0	0
			0	1
			0	0
			0	1
			0	0
			0	0
			0	0
			0	0
			0	0
			0	0
			0	5
			0	2
			0	1
			0	0
			0	0
			0	0
			0	0
			0	0
			0	0
			0	0
			0	0
			0	0
			0	1
			0	0
			0	0
			0	0
			0	0
			0	0
			0	0
			0	13
			0	0
			0	0
			0	0
			0	0
			0	0
			0	0
			0	0
			0	0
			0	0
			0	0
			0	0
			0	1
			0	0
			0	0
			0	0
			0	0
			0	0
			0	0
			0	0
			0	0
			0	0
			0	0
			0	0
			0	0
			0	0
			0	0
			0	0
			0	0
			0	0
			0	0
			0	0
			0	0
			0	0
			0	0
			0	0
			0	0
			0	0
			0	0
			0	0
			0	0
			0	0
			0	0
			0	0
			0	0
			0	0
			0	0
			0	0
			0	0
			0	0
			0	0
			0	0
			0	0
			0	0
			0	0
			0	0
			0	1
			0	0
			0	0
			0	0
			0	0
			0	0
			0	0
			0	0
			0	0
			0	0
			0	0
			0	0
			0	0
			0	0
			0	0
			0	0
			0	0
			0	0
			0	0
			0	0
			0	2
			0	0
			0	0
			0	0
			0	0
			0	0
			0	0
			0	0
			0	0
			0	0
			0	0
			0	0
			0	0
			0	0
			0	0
			0	0
			0	0
			0	0
			0	0
			0	0
			0	0
			0	0
			0	0
			0	1
			0	0
			0	0
			0	0
			0	0
			0	3
			0	0
			0	0
			0	0
			0	0
			0	1
			0	0
			0	0
			0	0
			0	0
			0	0
			0	0
			0	0
			0	0
			0	0
			0	1
			0	1
			0	0
			0	0
			0	1
			0	0
			0	1
			0	0
			0	0
			0	0
			0	0
			0	0
			0	0
			0	1
			0	0
			0	1
			0	4
			0	0
			0	0
			0	0
			0	0
			0	0
			0	0
			0	0
			0	0
			0	0
			0	0
			0	0
			0	0
			0	0
			0	0
			0	4
			0	0
			0	0
			0	0
			0	0
			0	0
			0	0
			0	0
			0	0
			0	0
			0	0
			0	0
			0	0
			0	0
			0	0
			0	0
			0	0
			0	0
			0	0
			0	0
			0	0
			0	0
			0	0
			0	0
			0	0
			0	0
			0	0
			0	0
			0	0
			0	0
			0	0
			0	0
			0	0
			0	0
			0	0
			0	0
			0	0
			0	0
			0	0
			0	0
			0	0
			0	0
			0	0
			0
			0
			0
			0
			0
			0
			0
			0
			0
			0
			0
			0
			0
			0
			0
			0
			0
			0
			0
			0
			0
			0
			0
			0
			0
			0
[truncated: 1,156 more rows]
