# Supplementary material for: The out-of-field dose in radiation therapy induces delayed tumorigenesis by senescence evasion
Source: eLife. 2022 Mar 18;11:e67190. doi: 10.7554/eLife.67190 (PMC8933005; doi:10.7554/eLife.67190)
Supplement: Figure 5—figure supplement 1—source data 1. [file elife-67190-fig5-figsupp1-data1.xlsx]

## Sheet: compilation
cinetique comet ph12	1x2Gy+0h				1x2Gy+72h				5x2Gy+0h				5x2Gy+72h
	Non irradiated	PTV	margin from -5 to 20 mm	margin from 22 to 47 mm	Non irradiated	PTV	margin from -5 to 20 mm	margin from 22 to 47 mm	Non irradiated	PTV	margin from -5 to 20 mm	margin from 22 to 47 mm	Non irradiated	PTV	margin from -5 to 20 mm	margin from 22 to 47 mm
	0	0	34.7607	38.64	65.0107	35.5654	0	0	0	0	0	0	0	0	0	0
	0	0	38.1324	56.1172	73.3129	44.5071	62.7974	0	0	0	0	0	0	0	0	0
	0	0	39.6239	62.9291	73.8158	46.0083	65.1759	0	0	0	0	0	0	0	0	0
	0	28.9049	40.1497	68.0203	76.3003	48.3813	75.6323	0	0	0	0	0	0	0	0	0
	0	29.2464	41.6385	70.1962	78.4032	53.5957	75.9811	0	0	0	0	0	0	0	0	0
	0	32.6886	42.7948	71.7125	79.449	54.1586	78.703	0	0	0	0	0	0	0	0	0
	0	33.2497	42.8553	72.1725	80.1788	54.9098	80.304	0	0	0	0	0	0	0	0	0
	0	33.3143	45.9105	72.8155	81.9486	55.7447	81.5907	68.1924	0	0	0	0	0	0	0	0
	26.3175	33.454	46.1025	75.2361	82.2926	60.2911	83.3199	68.4804	0	0	0	0	0	0	0	0
	27.1455	33.9891	46.5069	78.3479	84.1091	60.991	84.7759	73.5136	0	0	0	0	0	0	0	0
	28.9049	34.0717	46.5853	78.622	84.2698	62.7743	84.7811	74.0927	0	0	0	0	0	0	0	0
	28.9049	34.4238	47.8105	80.7844	85.2221	64.5586	85.0233	77.8414	0	0	0	0	0	0	0	0
	29.2464	34.6858	48.3459	85.599	85.6699	65.3407	85.0669	78.2681	0	0	0	0	0	0	0	0
	29.2464	34.7564	49.5814	86.238	85.7591	65.6628	86.084	79.9917	0	0	0	0	0	0	0	0
	32.6886	35.6316	51.1763	86.7622	86.2328	69.4333	86.2641	89.2541	0	0	0	0	0	0	0	0
	32.6886	36.8576	51.5104	88.1977	86.2333	71.61	87.2315	89.9332	0	0	0	0	0	0	0	0
	33.2497	37.8857	51.5731	89.3814	86.7013	72.0285	89.3983	90.102	0	0	0	0	0	0	0	0
	33.2497	38.4601	51.8331	90.5174	87.5329	72.3808	90.061	92.2864	0	0	0	0	0	0	0	0
	33.3143	38.5139	52.4103	91.8991	88.458	73.0431	92.0496	95.4719	0	0	0	0	0	0	0	0
	33.3143	40.6153	52.566	93.7157	89.8622	74.4559	92.0523	95.8785	0	0	0	25.8263	0	0	0	0
	33.454	41.1232	53.0413	95.3229	90.569	76.2448	93.3323	96.5299	0	0	0	31.8543	0	0	0	0
	33.454	41.4276	53.2582	96.3549	91.0886	82.5001	93.4669	97.3329	0	0	0	33.2833	0	0	0	0
	33.9891	53.1993	53.8489	99.683	91.5782	82.9621	93.9195	98.3992	0	0	0	33.8454	0	0	0	0
	33.9891	53.5018	54.4023	100.981	92.2169	83.4416	94.7529	100.184	0	0	0	33.8783	0	0	0	0
	34.0717	54.7826	56.0895	101.123	93.7878	84.3165	96.031	101.286	0	0	0	34.4383	0	0	0	0
	34.0717	54.7826	56.9435	109.367	94.2674	86.7137	96.9977	102.691	0	0	0	36.797	0	0	0	0
	34.2773	57.9994	57.9908	111.568	94.3689	86.8053	97.5839	103.061	0	0	0	37.9875	0	0	0	0
	34.3722	59.4396	58.6324	115.906	94.4981	90.4237	97.8747	103.161	0	0	0	38.4272	0	0	0	0
	34.4238	64.4465	58.867	116.242	95.6585	92.2908	99.9488	103.7	0	0	0	38.9572	0	0	46.816	0
	34.4238	82.9939	60.4009	116.674	96.0174	93.9298	100.821	103.86	0	0	0	40.3252	0	0	50.2933	0
	34.6858	85.0927	60.746	118.029	96.3062	94.2324	102.33	103.957	0	0	47.7867	41.2249	0	0	54.4594	0
	34.6858	85.9421	61.9181	128.173	96.6134	94.7924	102.671	104.746	0	0	52.7011	41.8534	0	0	55.4423	0
	34.7564	85.9421	63.7534	135.612	97.151	95.3032	104.064	105.715	0	0	57.5303	41.9934	0	0	59.9119	0
	34.7564	87.6268	63.9807	137.777	97.5157	96.2157	105.964	106.568	0	0	60.4244	42.9889	0	0	60.1306	0
	35.6316	87.6268	66.5194	139.017	98.1153	96.518	106.603	107.488	0	0	66.8043	44.2311	0	0	60.7355	0
	35.6316	93.2367	67.524	143.157	99.0008	103.056	106.637	107.517	0	0	66.8846	44.3077	0	0	62.048	0
	36.4472	94.3497	68.4254	144.433	99.4811	104.49	106.828	109.082	0	0	70.0176	44.5851	0	45.8644	62.174	0
	36.8576	97.1211	68.6567	147.654	102.134	107.345	107.128	109.628	0	0	70.4836	44.8453	0	50.8684	63.6165	0
	36.8576	101.495	70.2727	149.497	102.239	108.55	107.239	110.009	0	0	72.6908	44.8579	0	54.3438	64.9005	0
	36.9079	101.787	72.8882	151.542	102.55	108.923	108.637	111.069	0	0	75.6931	45.5692	0	54.5765	65.8507	0
	37.8857	102.381	73.0308	154.075	104.647	112.632	109.061	111.53	0	0	76.718	45.7686	0	56.9022	66.4934	0
	37.8857	103.612	74.4235	156.42	104.917	115.562	109.714	113.569	0	0	78.3758	45.8423	0	59.1531	68.1996	0
	38.4601	103.612	76.0781	156.617	104.945	116.326	110.7	113.693	0	0	78.6222	46.3931	0	59.6729	69.3908	0
	38.4601	104.054	81.7488	164.284	104.965	116.654	111.21	115.24	0	0	79.1892	48.0216	0	60.4136	69.8813	42.0911
	38.5139	105.183	83.06	164.428	105.348	116.847	112.405	115.361	0	0	79.383	50.854	0	62.1403	72.3854	45.0446
	38.5139	106.057	83.0839	176.744	107.322	117.615	112.942	116.116	0	0	80.1593	51.5632	0	62.3565	73.9123	45.444
	40.6153	107.3	85.7595	178.963	108.119	117.7	113.667	117.409	0	0	80.7314	51.6801	0	62.9485	76.6019	49.3521
	40.6153	107.978	90.0497	182.056	108.683	117.949	114.578	117.738	0	0	81.4427	52.1475	0	64.9797	78.3554	49.8469
	41.1232	108.758	90.8947	182.531	108.753	124.542	116.313	118.254	0	0	83.021	52.2689	0	65.3097	79.5971	50.6727
	41.1232	111.636	92.9737	182.891	112.185	128.901	117.299	118.486	0	0	83.9738	52.663	0	65.4288	80.0656	51.9349
	41.4276	113.591	95.438	190.269	112.913	132.269	118.758	118.638	0	0	84.2212	53.6724	0	65.6583	80.1172	53.5574
	41.4276	115.368	96.1408	190.772	113.349	137.455	121.641	120.095	0	0	84.7712	54.0437	0	65.723	80.3824	54.6658
	42.735	115.368	96.5434	196.341	113.635	144.547	121.986	121.419	0	0	85.4669	54.208	0	65.8596	80.5317	55.8256
	43.6808	116.275	96.6574	204.171	116.112	147.192	122.673	123.288	0	0	85.8293	54.9262	0	66.056	80.7173	56.0334
	44.2174	117.046	96.9137		117.505	147.968	123.801	123.445	0	35.9705	87.3709	55.0759	0	66.853	81.5711	57.0527
	44.9288	117.548	97.9713		117.778		124.283	124.36	0	39.7895	88.0265	56.9428	0	67.8829	85.2884	58.6726
	46.7852	117.548	99.4743		117.94		127.603	125.731	0	40.895	88.1127	57.3903	0	68.555	85.5363	59.2929
	46.7912	117.554	100.659		119.779		129.911	125.791	0	41.0965	88.5821	57.9053	0	70.0608	85.8602	59.8417
	47.669	117.554	105.089		120.288		134.827	129.716	0	41.8602	89.1429	58.9695	0	71.4533	86.9968	60.5639
	50.9191	120.777	106.323		122.667		144.16	129.943	0	42.3992	89.2274	59.1023	0	72.9643	87.9921	61.4075
	51.9887	123.845	106.55		123.439		179.786	132.575	0	43.4334	89.4642	59.567	0	73.5863	88.3426	61.5628
	53.1993	123.845	106.887		124.182		193.937	134.128	0	44.0571	90.3687	59.6756	0	75.8935	88.4328	62.1968
	53.1993	126.785	107.005		127.224			137.114	0	45.2521	90.8443	60.4113	0	76.5799	90.3559	62.3016
	53.5018	128.028	109.857		128.962			137.552	0	45.5326	90.9501	63.0159	0	77.0141	91.6553	63.018
	53.5018	128.028	110.766		129.684			140.876	0	45.6317	92.0348	63.8042	0	77.7056	97.1832	65.2016
	58.153	129.281	110.804		137.681			142.171	0	45.8844	92.2059	67.1805	0	78.129	98.1715	65.6572
	59.4396	129.281	111.695					142.568	0	46.1072	92.8972	67.9307	0	78.7795	99.106	65.7797
	59.4396	133.714	112.623					142.667	0	46.295	93.3194	68.7668	0	80.0759	100.8	65.9301
	62.0243	133.714	113.827					146.558	0	46.5192	93.4044	69.8346	0	80.404	107.364	66.0342
	64.4465	141.325	114.38					147.701	0	46.7695	94.8783	70.6053	0	80.7883	113.35	66.2313
	64.4465	141.325	114.638					151.405	0	46.9077	95.8354	73.3533	0	82.0366		66.3561
	108.758	150.475	114.871					156.076	0	48.7252	96.1612	73.8424	0	84.6827		66.4307
	108.758	150.475	115.691					156.405	0	48.8625	96.3168	77.1309	0	85.482		67.5237
		162.308	117.697					160.002	0	51.1172	97.1075	78.2597	0	85.5902		68.4539
		162.308	117.944					181.347	0	52.2095	100.467	81.146	0	87.3368		68.8283
		183.353	118.54						0	52.3877	103.488	82.0501	0	87.383		69.7573
		183.353	119.949						0	53.0399	106.963	87.4314	0	89.4796		70.3306
			120.011						0	53.6044	108.203	90.6564	0	90.46		70.8872
			120.698						0	54.2044	109.33	93.7447	0	91.7252		71.9417
			121.349						0	54.7101	109.577	96.3596	0	93.5671		72.6391
			121.781						0	55.3932	110.577	96.3917	0	94.9846		73.2926
			121.862						0	55.5963	111.405	96.7002	0	97.5436		73.8426
			122.063						0	55.6756	113.153	98.8219	0	103.388		74.2116
			122.325						0	56.0509	113.783	102.568	0	104.983		76.6841
			122.7						0	57.7766	115.589	106.993	0	109.647		76.9896
			123.058						0	58.9863	116.873	109.087	0	122.119		78.5671
			123.452						0	59.4223	117.776	113.777	0			81.0268
			126.321						0	59.697	121.081	114.916	0			82.2576
			126.824						0	60.0919	124.053	123.336	40.2769			83.1069
			127.592						0	61.1496	126.244	126.73	40.6739			84.9192
			129.2						0	61.6426	128.294	146.912	41.3874			87.4347
			129.582						0	62.587	130.212	282.277	43.0276			89.9894
			131.631						0	63.0472	135.099		48.7195			91.3239
			133.418						0	64.4934	135.214		50.1996
			134.233						0	64.5704	139.413		50.5722
			134.445						0	65.343	140.521		50.7883
			135.893						0	66.0709	145.902		51.2858
			135.896						0	66.3008	151.504		51.6864
			138.721						0	66.37	172.9		51.9385
			141.638						0	67.1357	175.485		52.4898
			143.207						0	70.5108	183.175		52.8138
			143.822						0	72.9769	191.268		53.2031
			143.874						0	73.0098	215.228		54.9584
			164.166						0	73.3787			56.1879
			167.115						0	74.3617			57.6978
			176.952						0	78.0084			58.2347
			207.502						0	78.123			58.3635
									0	78.9148			58.6137
									0	79.89			58.7133
									0	80.3824			58.9247
									0	81.1156			59.1528
									0	83.2316			59.8972
									0	86.9796			60.4399
									0	88.1577			60.6584
									0	96.9877			62.8705
									0	107.654			63.4364
									0	122.861			66.579
									0	126.063			68.2097
									0	147.82			68.3984
									0	147.925			69.3163
									0	153.146			73.747
									0	154.741			76.038
									0	160.267			77.7945
									0	160.68			78.9695
									0	164.444			80.4683
									0	171.169			82.8147
									0	173.694			133.588
									0	175.702
									0	175.706
									0	185.889
									0	208.526
									0
									0
									0
									0
									0
									0
									0
									0
									17.8133
									19.3511
									19.4425
									23.1012
									24.4873
									28.9824
									30.7823
									31.5248
									33.8948
									34.5214
									34.9877
									35.4369
									35.8034
									36.6732
									36.969
									40.7394
									40.7481
									40.7784
									41.0578
									41.8231
									42.7581
									43.1952
									43.207
									44.6456
									45.633
									46.6401
									48.8647
									51.3606
									52.7434
									53.9321
									54.7555
									57.4405
									57.4728
									58.0586
									58.2083
									58.2199
									58.5133
									62.2105
									63.4084
									66.4808
									71.6714
									72.8616
									76.2979
									79.3055
									79.3334
									80.4379
									84.1015
									96.2859
									104.861
									106.877
									110.881
									111.493
									113.129
									115.615
									119.05
									123.179
									123.511
									124.325
									125.899
									126.135
									126.435
									135.012
									137.409
									155.247
									155.409
									157.025

## Sheet: stat
Figure 5-Figure supplement 1-source data 1
	1x2Gy+0h				1x2Gy+72h				5x2Gy+0h				5x2Gy+72h
	Non irradiated	PTV	margin from -5 to 20 mm	margin from 22 to 47 mm	Non irradiated	PTV	margin from -5 to 20 mm	margin from 22 to 47 mm	Non irradiated	PTV	margin from -5 to 20 mm	margin from 22 to 47 mm	Non irradiated	PTV	margin from -5 to 20 mm	margin from 22 to 47 mm
moyenne	37.8171	87.4715	93.3401	119.937	99.6809	90.3392	102.587	103.577	22.5778	47.122	72.5432	53.0956	18.7648	44.1324	46.4431	35.5055
écart type	19.562	44.8189	36.584	42.7842	15.8406	28.4941	26.1945	40.1263	39.5145	51.8509	54.0087	42.3852	29.6592	39.5652	40.0441	34.1966
médiane	36.4472	101.495	96.6574	113.737	97.3334	90.4237	102.501	109.628	0	45.8844	84.7712	51.6217	0	60.0432	61.3917	49.3521
