# Supplementary material for: The out-of-field dose in radiation therapy induces delayed tumorigenesis by senescence evasion
Source: eLife. 2022 Mar 18;11:e67190. doi: 10.7554/eLife.67190 (PMC8933005; doi:10.7554/eLife.67190)
Supplement: Figure 5—figure supplement 1—source data 3. [file elife-67190-fig5-figsupp1-data3.xlsx]

## Sheet: compilation
cinetique comet ph8	1x2Gy+0h				1x2Gy+72h				5x2Gy+0h				5x2Gy+72h
	Non irradiated	PTV	margin from -5 to 20 mm	margin from 22 to 47 mm	Non irradiated	PTV	margin from -5 to 20 mm	margin from 22 to 47 mm	Non irradiated	PTV	margin from -5 to 20 mm	margin from 22 to 47 mm	Non irradiated	PTV	margin from -5 to 20 mm	margin from 22 to 47 mm
	0	0	0	0	0	0	0	0	0	0	0	0	0	0	0	0
	0	34.8059	0	0	0	0	0	0	0	0	0	0	0	0	0	0
	0	48.1641	0	0	0	0	0	0	0	0	0	0	0	0	0	0
	0	50.7144	0	0	0	0	0	0	0	0	0	0	0	0	0	0
	0	51.198	0	0	0	0	0	0	0	0	0	0	0	0	0	0
	0	51.4782	0	0	0	0	0	0	0	0	0	0	0	0	0	0
	0	52.5976	0	0	0	0	0	0	0	0	0	0	0	0	0	0
	0	53.1148	0	0	0	0	0	0	0	0	0	0	0	0	0	0
	0	56.5102	0	0	0	0	0	0	0	0	0	0	0	0	0	0
	0	56.7164	0	0	0	0	0	0	0	0	0	0	0	0	0	0
	0	57.5071	0	0	0	0	0	0	0	0	0	0	0	0	0	0
	0	57.9498	0	0	0	0	0	0	0	0	0	0	0	0	0	0
	0	58.4171	0	0	0	0	0	0	0	0	0	0	0	0	0	0
	0	59.4391	0	0	0	0	0	0	0	0	0	0	0	0	0	0
	0	59.5177	0	0	0	0	0	0	0	0	0	0	0	0	0	0
	0	59.7086	0	0	0	0	0	0	0	0	0	0	0	0	0	0
	0	59.7921	0	0	0	0	0	0	0	0	0	0	0	0	0	0
	0	59.9249	0	0	0	0	0	0	0	0	0	0	0	0	0	0
	0	60.2183	0	0	0	0	0	0	0	0	0	0	0	0	0	0
	0	60.6355	0	0	0	0	0	0	0	0	0	0	0	0	0	0
	0	62.6088	0	0	0	0	0	0	0	0	0	0	0	0	0	0
	0	64.2011	0	0	0	0	0	0	0	0	0	0	0	0	0	0
	0	65.344	0	0	0	0	0	0	0	0	0	0	0	0	0	0
	0	65.3576	0	0	0	0	0	0	0	0	0	0	0	0	0	0
	0	66.2684	0	0	0	0	0	0	0	0	0	0	0	0	0	0
	0	66.7241	0	0	0	0	0	0	0	0	0	0	0	0	0	0
	0	66.9939	0	0	0	0	0	0	0	0	0	0	0	0	0	0
	0	67.4496	0	0	0	0	0	0	0	0	0	0	0	0	0	0
	0	67.5596	0	0	0	0	0	0	0	0	0	0	0	0	0	0
	0	67.8626	0	0	0	0	0	0	0	0	0	0	0	0	0	0
	0	68.331	0	0	0	0	0	0	0	0	0	0	0	0	0	0
	0	69.1184	0	0	0	0	0	0	0	0	0	0	0	0	0	0
	0	70.0003	0	0	0	0	0	0	0	0	0	0	0	0	0	0
	0	70.5041	0	0	0	0	0	0	0	0	0	0	0	0	0	0
	0	70.7241	0	0	0	0	0	0	0	0	0	0	0	0	0	0
	0	72.4734	0	0	0	0	0	0	0	0	0	0	0	0	0	0
	0	72.7236	0	0	0	0	0	0	0	0	0	0	0	0	0	0
	0	72.7755	0	0	0	0	0	0	0	0	0	0	0	0	0	0
	0	77.19	0	0	0	0	0	0	0	0	0	0	0	0	0	0
	0	77.2916	0	0	0	0	0	0	0	0	0	0	0	0	0	0
	0	77.6652	0	0	0	0	0	0	0	0	0	0	0	0	0	0
	0	78.7125	0	0	0	0	0	0	0	0	0	0	0	0	0	0
	0	78.8893	0	0	0	0	0	0	0	0	0	0	0	0	0	0
	0	80.1603	0	0	0	0	0	0	0	0	0	0	0	0	0	0
	0	80.3567	0	0	0	0	0	0	0	0	0	0	0	0	0	0
	0	80.8993	0	0	0	0	0	0	0	0	0	0	0	0	0	0
	0	82.3944	0	0	0	0	0	0	0	0	0	0	0	0	0	0
	0	83.3627	0	0	0	0	0	0	0	0	0	0	0	0	0	0
	0	86.712	0	0	0	0	0	0	0	0	0	0	0	0	0	0
	0	88.6768	0	0	0	0	0	0	0	0	0	0	0	0	0	0
	0	88.9531	0	0	0	0	0	0	0	0	0	0	0	0	0	0
	0	89.6191	19.2174	0	0	28.0348	0	0	0	0	0	0	0	0	0	0
	0	93.8368	20.152	0	0	28.3235	0	0	0	0	0	0	0	0	0	0
	0	95.927	31.8934	0	0	31.1742	0	0	0	0	0	0	0	0	0	0
	0	97.3809	35.0979	0	0	37.6298	0	0	0	0	0	0	0	0	0	0
	0	98.2164	36.0601	0	0	38.5901	0	0	0	0	0	0	0	0	0	0
	0	98.7947	36.9037	0	0	39.3	0	0	0	0	0	0	0	0	0	0
	0	108.095	37.7338	0	0	41.8023	0	0	0	0	0	0	0	0	0	0
	0	109.178	39.7484	0	0	53.1571	0	0	0	0	0	0	0	0	0	0
	0	110.771	40.0073	0	0	59.1386	0	10.7922	0	0	0	0	0	0	0	0
	0	114.576	42.7356	0	0	63.9821	0	10.8195	0	0	0	0	0	0	0	0
	0	117.367	46.9916	0	0	71.434	0	11.517	0	0	0	0	0	0	0	0
	0	118.014	47.5098	0	0	73.8123	0	11.8494	0	0	0	0	0	0	0	0
	0	125.626	48.9998	20.3996	0	89.1846	0	13.5717	0	0	0	0	0	0	0	0
	0		50.1384	20.9424	0	251.355	0	14.6367	0	0	0	0	0	0	0	0
	0		50.6647	25.0112	0		0	14.8494	0	0	0	0	0	0	0	0
	0		54.7236	29.4349	0		0	16.31	0	0	0	0	0	0	0	0
	0		57.3979	30.2615	0		0	18.0451	0	0	0	0	0	0	0	0
	0		57.4897	30.9085	0		0	18.5961	0	0	0	0	0	0	0	0
	0		59.0091	37.111	0		0	19.2144	0	0	0	0	0	45.7614	0	0
	0		60.4836	37.427	0		8.92697	19.4525	0	0	0	0	0	46.4769	0	0
	0		60.7909	37.6404	0		9.29902	20.5342	0	0	0	0	0	50.6462	0	0
	0		61.6916	38.351	0		10.0136	21.6082	0	0	0	0	0	58.4523	0	0
	0		61.7757	39.6108	0		10.9	22.7311	0	0	0	0	0	58.7179	0	0
	0		62.7237	42.925	0		12.2856	25.2388	0	0	0	0	0	66.3176	0	0
	0		62.8432	43.8913	0		13.0796	25.2996	0	0	0	0	29.7395	66.6881	0	0
	0		63.0324	45.2295	0		14.0836	26.5373	0	0	0	0	42.9966	66.931	0	0
	0		63.5969	45.833	0		14.113	27.1617	0	0	0	0	43.8765	79.9952	0	0
	0		64.0263	45.9623	0		14.672	27.7776	0	0	0	0	44.8985	86.3237	0	0
	0		64.4927	46.739	0		15.5049	28.138	0	16.3977	0	0	50.694	91.4798	0	0
	0		65.1467	48.3842	0		16.1834	29.1458	0	18.9942	0	0	52.6442	94.2811	0	0
	0		65.5855	49.0753	0		16.3327	29.1905	0	19.3855	0	0	57.4746	96.6197	30.7572	0
	0		70.5017	51.8439	0		18.9977	29.5127	0	19.4838	0	0	62.4141	104.69	47.6096	0
	0		72.4549	52.9608	0		19.0635	30.0365	0	19.5617	0	0	62.5783	111.104	54.3715	0
	0		76.3463	54.2977	0		19.0785	30.6682	0	22.8937	0	0	63.0363	114.898	55.471	0
	0		76.6449	56.7365	0		19.3253	31.9204	0	23.8449	18.9916	0	65.3258	119.266	59.6764	0
	0		77.5841	57.1985	0		19.4212	32.7394	0	24.4242	19.7474	0	67.3794	125.571	61.5654	0
	0		78.6925	57.2792	0		20.7909	33.6573	0	24.7131	20.7306	0	68.2165	155.932	61.8518	0
	0		79.161	57.5467	0		21.3322	34.5355	0	25.2418	22.0106	0	68.5286	215.937	63.3539	0
	0		80.9968	57.6638	0		22.6521	34.8525	0	27.0425	22.1338	0	77.0949		75.6192	0
	0		84.9492	57.6926	0		23.1886	36.1037	0	27.304	23.9378	0	78.6696		86.1537	0
	35.8412		86.3856	57.9389	0		23.2533	40.8955	0	28.5799	24.015	0	93.3776		94.636	0
	36.0728		87.4417	60.1204	0		24.1873	41.9815	0	29.2929	25.9726	0	98.2235			0
	37.1189		92.1218	64.6234	32.7087		25.8815	43.3904	0	29.5553	26.3909	0				31.6539
	38.3289		92.554	65.5025	35.3269		26.7073	47.5378	0	29.8149	27.5058	0				39.0314
	40.3214		98.5028	72.132	40.4216		27.0208	95.5914	0	30.048	28.5269	0				43.8204
	41.2766		102.657	73.2236	47.7335		28.6344	105.801	0	30.3253	28.5487	0				44.0005
	41.7226		103.845	75.1193	51.5884		29.1107	119.499	0	31.3766	28.8266	0				44.0382
	48.2897		113.759	77.2953	57.6617		29.3754	221.601	0	31.4534	28.9831	0				48.2189
	53.0055		134.932	80.5927	58.2744		30.3367		0	31.6305	29.8433	0				52.819
	53.9013		140.797	81.4303	61.3304		30.8614		0	31.7677	30.2129	0				57.0328
	56.6553		149.248	89.1257	65.8476		32.1388		0	32.2073	31.4836	0				59.0341
	57.5997			107.207	67.3619		32.1512		0	32.6424	32.1952	0				73.2723
	59.8124			111.463	72.4239		33.1096		0	33.1041	32.2047	0				77.2696
	60.8468			145.692	80.1506		35.4981		0	33.5032	32.389	0
	64.1704			162.973	80.681		35.8772		0	33.9431	34.7707	0
	65.5343			168.952	174.407		36.7181		0	34.673	35.3488	0
	82.1497				178.432		36.941		0	34.8058	35.526	0
	86.8649						38.6765		0	34.8641	35.9842	16.1908
	99.319						39.184		0	35.5353	36.3007	17.9267
	105.656						39.2158		33.354	36.3757	37.9418	19.7367
	107.539						39.3099		35.5394	36.4481	38.2412	20.193
	138.995						42.9564		36.2634	36.4891	38.4599	20.2474
	192.255						45.3288		39.9417	36.7236	38.536	23.3366
							45.4793		44.2163	37.4329	39.5293	23.3572
							50.5256		45.8798	37.9458	39.7915	25.5506
							52.0684		46.2732	38.6335	40.7802	25.5594
							54.8943		47.2817	39.9326	42.7653	25.7498
							56.0285		47.3784	41.1237	43.5377	26.3208
							59.6458		49.6512	44.4379	46.5273	26.4315
							63.8562		54.7163	46.4394	49.7194	26.5627
							85.7925		60.9049	47.1741	54.324	27.7484
							95.1946		61.5257	47.6928	54.5214	28.7821
							120.21		62.461	48.1411	54.6663	29.3639
							120.297		65.8161	48.6215	71.5015	29.78
							133.891		70.6053	50.0467	82.8859	30.4222
							140.515		71.0371	55.7269	115.287	31.1966
									75.6428	56.7293		31.57
									77.4875	57.3684		31.9891
									79.0221	57.5241		33.8351
									81.9876	59.7786		34.5939
									86.3132	60.2586		34.8851
									90.8866	66.2235		34.9382
									92.0351	71.697		35.1306
									92.3055	77.2031		35.4968
									97.0471	81.6947		37.7618
									106.218	92.3649		38.0135
										102.299		38.1461
										122.403		38.1829
										135.134		39.1983
										143.824		42.0129
										221.611		42.378
												44.9471
												47.8407
												49.398
												49.575
												50.1344
												50.1568
												53.9351
												54.5961
												55.9942
												57.1224
												57.1452
												58.3577
												58.4382
												58.6941
												62.564
												66.7098
												70.3075
												75.388
												76.1191
												79.1699
												84.5189
												86.2439
												86.5078
												92.2215
												109.462

## Sheet: stat
Figure 5-Figure supplement 1-source data 3
	1x2Gy+0h				1x2Gy+72h				5x2Gy+0h				5x2Gy+72h
	Non irradiated	PTV	margin from -5 to 20 mm	margin from 22 to 47 mm	Non irradiated	PTV	margin from -5 to 20 mm	margin from 22 to 47 mm	Non irradiated	PTV	margin from -5 to 20 mm	margin from 22 to 47 mm	Non irradiated	PTV	margin from -5 to 20 mm	margin from 22 to 47 mm
moyenne	14.0638	73.6578	34.0024	25.3435	10.2255	13.9526	17.1663	14.8822	12.7868	21.2247	12.611	15.917	12.1201	20.8549	7.51158	5.48261
écart type	32.7757	21.5951	39.49	37.215	30.1692	37.124	27.982	30.1725	27.504	33.1465	20.7033	24.9962	25.9806	43.4566	21.3147	16.6013
médiane	0	69.5594	9.6087	0	0	0	0	0	0	0	0	0	0	0	0	0
