# Supplementary material for: The out-of-field dose in radiation therapy induces delayed tumorigenesis by senescence evasion
Source: eLife. 2022 Mar 18;11:e67190. doi: 10.7554/eLife.67190 (PMC8933005; doi:10.7554/eLife.67190)
Supplement: Figure 5—figure supplement 2—source data 1. [file elife-67190-fig5-figsupp2-data1.xlsx]

## Sheet: Feuil R1)
05042016_XRCC1_hebdoM2_V2_F6MC1		ctr	2	8	4*2+30	4*2+72h
	A1	5.34291	12.2029	20.0577	36.3777	47.0432			7.32107	14.9326	21.2197	48.5074	47.8799		0.0198536	0.00842491	0.00455499	0.000511821			0.918065		Non-irradiated
	B1	8.05199	18.5169	16.1818	52.1194	46.9375			8.61292	19.7885	27.6604	63.4756	45.4259		0.00513592	0.00412215	0.000244829	0.000918313			0.00376183	PTV
	C1	8.25602	15.642	25.8209	60.6924	54.7854			8.72005	19.9489	26.599	54.1544	37.5041		0.0265277	0.00146281	0.000859955	0.000958811			0.00873568	Margin (distance in mm)	-4 to 4
	D1	7.63335	13.3684	22.8182	44.84	42.7537			8.33723	24.959	29.7102	63.3745	35.3537		0.000524574	0.0209634	0.00725508	0.00210641			0.0380704		5 to 13
	A2	7.63446	19.2923	21.7812	59.4485	47.5644			9.47818	23.6306	32.1979	57.3008	33.7637		0.00041215	0.0100464	0.00212677	0.00043734			0.0126607		14 to 22
	B2	7.0625	15.9588	30.1216	60.1743	38.5695			8.06819	18.2753	32.2691	43.7181	35.2741		0.0636356	0.00325026	0.00499048	0.000742029			0.172873		23 to 31
	C2	10.4612	20.3386	25.9054	62.8987	43.7027			8.52951	18.5534	24.316	50.6325	36.2838		0.0522161	0.00849904	0.00375873	0.000979158			0.0602673		32 to 40
	D2	9.29358	23.5644	32.8333	71.3809	51.8671			8.93581	20.9605	24.2728	45.8745	29.5857		0.0144558	0.0160786	0.00379059	0.000455229			0.0320365		41 to 49
	A3	7.11765	17.7931	27	49.0608	40.7304			7.50157	22.5321	29.9284	38.9956	27.5548		0.0184018	0.0200642	0.00704249	0.0138999			0.100893
	B3	7.47101	13.2211	23.3077	60.1868	39.6029			12.6853	17.9913	32.3964	44.8939	29.5913		0.0245292	0.00247377	0.00401359	0.00200427			0.0344035
	C3	11.3323	25.1089	25	47.5264	30.7506			7.92959	18.6257	29.2484	45.9045	27.8469		0.000881829	0.00144283	0.00742861	0.000139659			0.0491158
	D3	8.95924	23.6724	31.0882	59.8435	38.9325			10.0657	23.4164	31.4976	42.1375	36.8314		0.026053	0.00867827	0.00914416	1.31062e-06			0.410107
	A4	7.44684	27.87	24.5441	39.3522	30.2439
	B4	7.78031	25.7143	19.6721	75.6602	31.9976
	C4	9.84903	22.396	40.5753	73.6839	42.3125			8.84875
	D4	8.27272	23.8558	34.0492	64.8018	36.861				22.0818	29.0419	59.5763	38.0119		0.00815008	0.00914868	0.00262166	0.00110522			0.0158072	*
	A5	9.86541	21.1771	23.1333	44.0797	33.6319				18.2753	32.2691	43.7181	35.2741		0.0636356	0.00325026	0.00499048	0.000742029			0.172873
	B5	8.48626	23	28.3276	66.9504	38.2787				18.5534	24.316	50.6325	36.2838		0.0522161	0.00849904	0.00375873	0.000979158			0.0602673
	C5	8.95688	26.1981	35.9863	56.6603	30.8424				20.9605	24.2728	45.8745	29.5857		0.0144558	0.0160786	0.00379059	0.000455229			0.0320365	*
	D5	10.6041	24.1474	41.3443	61.5129	32.3019				22.5321	29.9284	38.9956	27.5548		0.0184018	0.0200642	0.00704249	0.0138999			0.100893
	A6	7.50288	19.6	32.9524	30.6761	33.2448				17.9913	32.3964	44.8939	29.5913		0.0245292	0.00247377	0.00401359	0.00200427			0.0344035	*
	B6	9.16944	18.6867	38.3673	52.8379	30.8342				18.6257	29.2484	45.9045	27.8469		0.000881829	0.00144283	0.00742861	0.000139659			0.0491158	*
	C6	7.68772	25.3529	24.9273	44.118	39.3811
	D6	7.91273	9.46154	32.8293	47.2405	37.6362
	A7	6.88104	19.5529	17.5775	41.7462	34.662			1.344	2.78379	4.10109	10.3618	5.01834
	B7	10.7223	13.2121	29.3538	45.6521	34.7706			1.55354	3.13437	4.84635	5.47552	5.65813
	C7	6.64092	26.9615	23.4943	50.0345	42.7784			1.91562	5.48941	3.35177	6.79781	4.56306
	D7	9.87376	14.487	26.8382	65.0973	32.9241			1.06343	2.36857	9.38668	16.6966	5.41821
	A8	6.20304	15.5	19.2206	32.9719	28.9456			0.943996	2.10368	8.06546	9.76499	3.21834
	B8	7.71776	24.4706	18.3846	47.7186	25.9428			0.753048	6.57518	5.53386	9.4133	3.92764
	C8	13.2079	25.5088	29.961	48.466	31.1965			2.07362	6.2386	5.09325	10.2202	4.41167
	D8	8.61453	18.3626	29.525	54.3414	32.258			3.01693	4.81574	6.32816	9.09729	2.79381
	A9	7.60401	29.3617	27.1864	34.7101	33.8744			0.558522	5.90368	9.33261	9.17561	7.26545
	B9	6.70069	25.5647	19.2059	37.2006	32.0791			1.27727	4.41437	5.09592	9.03273	4.23659
	C9	7.99228	17.814	41.5676	31.7281	17.708			1.57129	1.83005	3.78025	11.4656	2.01001
	D9	7.70928	17.3882	31.7536	52.3437	26.5575			1.0027	7.12763	7.43959	11.0848	1.29234
	A10	13.3436	23.828	27.1207	33.4061	24.7802
	B10	11.8952	18.9907	34.7887	42.5706	33.5768
	C10	14.1346	14.4576	29.3553	49.3467	27.3139			1.42283
	D10	11.3676	14.6887	38.321	54.252	32.6944				3.27401	6.41257	9.68373	4.71444
	A11	7.78012	20.85	25.0164	37.2143	27.1074				6.57518	5.53386	9.4133	3.92764
	B11	6.24538	19.3301	28.1667	35.0265	29.3941				6.2386	5.09325	10.2202	4.41167
	C11	7.64919	16.7647	29.7059	57.8182	25.3392				4.81574	6.32816	9.09729	2.79381
	D11	10.0437	17.5579	34.1045	53.559	29.5472				5.90368	9.33261	9.17561	7.26545
	A12	8.92184	19.6697	24.2286	30.3641	36.8631				4.41437	5.09592	9.03273	4.23659
	B12	11.3674	32.3951	41.0282	35.4686	37.3987				1.83005	3.78025	11.4656	2.01001
	C12	9.96625	16.1064	27.2192	48.5772	35.0305
	D12	10.0072	25.4945	33.5143	54.1401	38.0331
		8.84875	20.3012	28.443	49.9141	35.2413

## Sheet: Feuil1
Result Info
Summary
Data Selection
20160314_XRCC1_MT-0225_2016.03.14.16.59.33 > 20150519 ctr (2016-04-05 15:45:17)
5
6
7
8
9
10
11
12
13
Download
Row	Col	WellName	Nuclei - Number of Objects	Nuclei - Number of Spots Selected- par noyau - Mean per Well	Nuclei - Number of Spots Selected- par noyau - StdDev per Well	Nuclei - Spot Background Intensity- Mean par noyau - Mean per Well	Nuclei - Spot Area [px²]- Sum par noyau - Mean per Well	Nuclei - Spot Area [px²]- Sum par noyau - StdDev per Well	Number of Analyzed Fields
1	1	A1	87	5.57471	10.3661	368.284	202.057	374.694	6
2	1	B1	78	6.47436	11.0003	402.021	235.474	398.886	6
3	1	C1	89	6.79775	9.42576	373.913	247.326	342.4	6
4	1	D1	81	4	7.14143	391.558	145.975	260.244	6
1	2	A2	55	6.03636	9.42016	390.311	218.909	340.735	6
2	2	B2	56	3.83929	5.11247	417.19	140.054	186.22	6
3	2	C2	69	8.75362	9.0917	415.285	317.319	327.824	6
4	2	D2	82	8.71951	8.66706	396.439	316.939	313.787	6
1	3	A3	51	6.11765	8.80601	364.505	222.784	320.835	6
2	3	B3	69	5.23188	5.79083	437.957	190.652	211.192	6
3	3	C3	62	11.6774	11.5613	400.97	423.226	417.583	6
4	3	D3	96	4.61458	5.99714	414.902	167.323	216.433	6
1	4	A4	60	4.86667	7.52728	445.522	176.617	272.485	6
2	4	B4	72	4.09722	5.1325	461.55	149.736	187.53	6
3	4	C4	78	7.10256	6.64809	458.252	258.949	240.579	6
4	4	D4	66	7.54545	8.00996	408.081	274.076	290.591	6
1	5	A5	59	8.66102	9.41314	403.019	315.051	341.821	6
2	5	B5	78	5.14103	6.24546	412.619	187.603	227.654	6
3	5	C5	94	7.21277	7.76935	433.714	262.479	282.627	6
4	5	D5	61	8.01639	7.27666	437.022	290.918	262.808	6
1	6	A6	64	4.34375	7.01069	380.035	158.688	255.809	6
2	6	B6	67	7.98507	7.91143	445.044	290.194	286.818	6
3	6	C6	83	3.98795	4.70727	402.911	145.446	171.505	6
4	6	D6	94	7.44681	8.97022	393.222	270.436	324.691	6
1	7	A7	65	4.18462	7.03094	406.745	152.462	255.354	6
2	7	B7	78	8.61538	7.49585	461.384	313.5	271.807	6
3	7	C7	85	4.84706	5.75182	433.699	176.953	209.688	6
4	7	D7	65	5.47692	5.68196	423.503	199.785	206.331	6
1	8	A8	73	4.93151	7.92557	443.844	179.466	287.64	6
2	8	B8	71	3.90141	4.62958	431.593	142.169	168.557	6
3	8	C8	76	10.0658	6.85339	441.493	365.737	248.451	6
4	8	D8	79	4.16456	4.97025	425.508	152.392	181.732	6
1	9	A9	58	7.94828	8.71664	405.761	289.086	314.724	6
2	9	B9	67	4.38806	5.15797	433.115	160.284	187.992	6
3	9	C9	62	7.91935	7.40691	458.074	288.774	269.911	6
4	9	D9	93	3.25806	5.76138	430.715	117.978	208.197	6
1	10	A10	77	7.71429	10.6411	394.065	280.714	385.466	6
2	10	B10	79	8.70886	6.76179	435.312	316.608	245.615	6
3	10	C10	84	5.60714	6.59686	428.798	204.762	240.109	6
4	10	D10	71	8.84507	11.4812	409.157	320.845	415.745	6
1	11	A11	60	6.48333	8.03486	379.453	236.05	292.626	6
2	11	B11	93	4.58065	6.16322	437.053	167.473	224.862	6
3	11	C11	74	3.68919	5.63241	387.084	134.473	204.819	6
4	11	D11	76	7.71053	6.3368	417.431	279.934	228.399	6
1	12	A12	101	4.77228	7.51117	370.626	174.208	273.128	6
2	12	B12	75	7.89333	12.3765	407.332	287.133	447.578	6
3	12	C12	76	7.31579	9.89304	373.613	266.697	359.996	6
4	12	D12	97	5.38144	6.96187	402.795	196.278	253.729	6

## Sheet: Feuil2
Result Info
Summary
Data Selection
4
20160314_XRCC1_MT-0224_2016.03.14.16.33.38 > 20150519 ctr (2016-04-05 15:41:10)
6
7
8
9
10
11
12
13
Download
Row	Col	WellName	Nuclei - Number of Objects	Nuclei - Number of Spots Selected- par noyau - Mean per Well	Nuclei - Number of Spots Selected- par noyau - StdDev per Well	Nuclei - Spot Background Intensity- Mean par noyau - Mean per Well	Nuclei - Spot Area [px²]- Sum par noyau - Mean per Well	Nuclei - Spot Area [px²]- Sum par noyau - StdDev per Well	Number of Analyzed Fields
1	1	A1	63	5.11111	9.61872	357.934	186.175	349.348	6
2	1	B1	81	9.62963	14.0129	374.796	348.543	506.641	6
3	1	C1	84	9.71429	11.9382	400.987	353	431.499	6
4	1	D1	75	11.2667	12.4936	391.592	409.12	450.805	6
1	2	A2	86	9.23256	14.1052	374.238	335.267	511.317	6
2	2	B2	84	10.2857	10.9253	368.345	374.595	396.279	6
3	2	C2	83	12.1687	11.7347	365.395	441.819	425.411	6
4	2	D2	68	9.86765	9.55566	397.62	358.882	345.408	6
1	3	A3	68	8.11765	12.4727	414.057	295.015	452.94	6
2	3	B3	69	9.71014	12.3313	396.116	354.29	449.236	6
3	3	C3	78	10.9872	12.3146	373.347	399.282	445.613	6
4	3	D3	102	13.3039	11.6838	395.622	484.206	424.471	6
1	4	A4	74	10.027	13.8752	441.605	365.405	504.286	6
2	4	B4	82	11.4634	9.51567	373.883	417.427	345.414	6
3	4	C4	89	12.5955	10.1631	390.619	459.247	370.483	6
4	4	D4	65	9	9.05884	389.863	328.6	329.803	6
1	5	A5	86	11.0698	14.4196	388.822	403.663	524.948	6
2	5	B5	89	11.8315	10.4373	420.185	430.584	378.243	6
3	5	C5	97	10.701	9.11405	409.968	390.216	331.154	6
4	5	D5	99	13.1919	10.515	393.612	479.97	381.373	6
1	6	A6	71	10.662	11.7704	427.661	387.93	427.904	6
2	6	B6	65	10.3538	9.40816	422.463	378.2	342.827	6
3	6	C6	80	11.3875	8.9831	390.495	416.05	327.582	6
4	6	D6	103	8.37864	7.87415	385.594	306.621	287.789	6
1	7	A7	71	9.57746	11.1389	427.405	349.451	405.759	6
2	7	B7	82	12.8293	11.6818	410.013	467.573	424.573	6
3	7	C7	69	8.43478	7.17323	438.058	308.696	262.175	6
4	7	D7	85	14.2706	12.6297	428.499	519.635	459.776	6
1	8	A8	59	7.47458	8.92373	438.762	272.864	323.253	6
2	8	B8	88	11.5341	9.97808	438.57	420.193	362.388	6
3	8	C8	80	16.35	14.5063	422.733	595.212	526.972	6
4	8	D8	62	13.0645	10.3288	417.314	477.097	377.123	6
1	9	A9	77	7.25974	9.53857	411.488	264.532	346.123	6
2	9	B9	75	9.01333	10.5389	397.194	328.467	384.206	6
3	9	C9	92	8.06522	10.0206	393.847	294.837	364.723	6
4	9	D9	81	12.1605	14.957	393.398	439.333	536.944	6
1	10	A10	74	18.973	20.4377	416.191	687.932	740.47	6
2	10	B10	98	15.0816	11.0058	390.81	549.337	400.496	6
3	10	C10	71	22.662	13.3223	419.838	824.493	483.14	6
4	10	D10	82	13.8902	10.4433	401.187	507.561	380.735	6
1	11	A11	78	9.07692	12.445	400.385	329.744	449.39	6
2	11	B11	89	7.91011	8.37154	409.646	288.348	304.128	6
3	11	C11	87	11.6092	11.547	438.235	423.138	420.333	6
4	11	D11	69	12.3768	12.1511	454.888	451.971	444.553	6
1	12	A12	56	13.0714	15.6877	403.797	475.018	569.132	6
2	12	B12	82	14.8415	10.5579	413.266	539.939	382.217	6
3	12	C12	60	12.6167	11.6751	382.731	460.833	425.308	6
4	12	D12	79	14.6329	11.8356	416.375	534.278	432.478	6

## Sheet: Feuil3
Result Info
Summary
Data Selection
4
5
20160314_XRCC1_MT-0223_2016.03.14.20.01.01 > 20150519 8&2gy (2016-04-07 13:12:32)
7
8
9
10
11
12
13
Download
Row	Col	WellName	Nuclei - Number of Objects	Nuclei - Number of Spots Selected- par noyau - Mean per Well	Nuclei - Number of Spots Selected- par noyau - StdDev per Well	Nuclei - Spot Background Intensity- Mean par noyau - Mean per Well	Nuclei - Spot Area [px²]- Sum par noyau - Mean per Well	Nuclei - Spot Area [px²]- Sum par noyau - StdDev per Well	Number of Analyzed Fields
1	1	A1	48	51.9792	37.6747	343.362	1794.29	1301.05	6
2	1	B1	52	25.7692	30.3513	304.967	889.346	1044.95	6
3	1	C1	74	46	37.3121	341.387	1593.39	1284	6
4	1	D1	51	44.902	36.8333	380.924	1554.94	1268.51	6
1	2	A2	58	46	34.6987	367.667	1593.93	1194.25	6
2	2	B2	55	50.6364	27.7217	368.964	1764.67	952.079	6
3	2	C2	69	62.4928	23.5931	405.904	2160.32	805.259	6
4	2	D2	75	52.7733	29.155	369.033	1833.17	1002.62	6
1	3	A3	75	59.88	39.2404	372.754	2061.05	1336.87	6
2	3	B3	74	69.1351	28.3372	392.195	2392.2	970.826	6
3	3	C3	85	58.0824	33.3203	360.356	2007.49	1139.88	6
4	3	D3	73	70.6986	37.4765	395.887	2442.97	1279.33	6
1	4	A4	80	47.5125	35.3568	382.537	1645.71	1214.94	6
2	4	B4	55	73.1273	36.974	373.437	2527.25	1271.9	6
3	4	C4	92	77.25	28.792	394.261	2661.35	980.783	6
4	4	D4	82	70.6463	31.1295	393.66	2441.18	1062.42	6
1	5	A5	61	45.3607	33.4908	411.63	1574.3	1151.73	6
2	5	B5	62	53.5968	29.4008	380.482	1860.44	1008.93	6
3	5	C5	56	57.1964	28.7335	380.419	1986.25	993.717	6
4	5	D5	61	76.6066	32.6595	389.174	2632.97	1104.47	6
1	6	A6	40	62.4	32.9567	412.701	2151.45	1130.03	6
2	6	B6	60	51.2833	31.5128	413.465	1779.62	1088.96	6
3	6	C6	77	52.5065	18.8461	359.07	1828.38	653.848	6
4	6	D6	70	65.8	19.5845	363.928	2271.17	664.207	6
1	7	A7	62	55.1613	41.724	342.59	1906.69	1437.44	6
2	7	B7	58	79.7241	24.4467	420.097	2750.33	835.958	6
3	7	C7	82	67.3049	33.5959	350.185	2331.51	1152.47	6
4	7	D7	90	70.3333	34.3822	365.495	2426.82	1181.02	6
1	8	A8	44	55.9773	33.9613	414.568	1942.91	1170.22	6
2	8	B8	71	51.2817	29.4978	394.776	1782.11	1016.31	6
3	8	C8	59	75.7966	27.7413	393.756	2613.83	940.124	6
4	8	D8	70	85.9857	33.2245	408.605	2958.3	1135.89	6
1	9	A9	68	43.5147	33.224	391.742	1512.51	1149.1	6
2	9	B9	78	57.2692	54.5486	337.658	1981.09	1864.05	6
3	9	C9	69	73.1014	39.8638	352.428	2522.86	1371.08	6
4	9	D9	80	69.8	42.4772	376.942	2397.24	1451.86	6
1	10	A10	59	65.7288	41.6785	393.456	2253.71	1419.84	6
2	10	B10	43	75.9535	24.3945	412.187	2631.4	837.445	6
3	10	C10	77	68.2987	33.1004	363.24	2358.49	1133.6	6
4	10	D10	63	82.5714	30.6124	356.847	2854.98	1051.25	6
1	11	A11	80	66.8375	38.4982	401.319	2301.04	1320.99	6
2	11	B11	76	74.2895	35.6516	374.932	2561.64	1219.24	6
3	11	C11	71	67.1408	43.4328	357.294	2322.18	1500.65	6
4	11	D11	92	60.5761	33.7734	377.255	2093.99	1152.94	6
1	12	A12	51	72.7451	31.973	430.401	2516.57	1099.91	6
2	12	B12	66	77.1818	27.6444	392.319	2666.68	945.207	6
3	12	C12	62	67.8387	35.7721	390.781	2350.39	1226.95	6
4	12	D12	65	89.3385	30.7862	407.836	3080.42	1050.14	6

## Sheet: Feuil4
Result Info
Summary
Data Selection
4
5
6
20160314_XRCC1_MT-0222_2016.03.14.20.26.57 > 20150519 8&2gy (2016-04-05 15:37:57)
8
9
10
11
12
13
Download
Row	Col	WellName	Nuclei - Number of Objects	Nuclei - Number of Spots Selected- par noyau - Mean per Well	Nuclei - Number of Spots Selected- par noyau - StdDev per Well	Nuclei - Spot Background Intensity- Mean par noyau - Mean per Well	Nuclei - Spot Area [px²]- Sum par noyau - Mean per Well	Nuclei - Spot Area [px²]- Sum par noyau - StdDev per Well	Number of Analyzed Fields
1	1	A1	69	27.1304	32.1014	314.239	934.464	1099.98	6
2	1	B1	89	35.1236	35.4573	321.965	1208.96	1217.35	6
3	1	C1	81	28.8519	33.8685	307.196	999.753	1170.55	6
4	1	D1	76	34.6053	39.939	294.542	1196.74	1377.73	6
1	2	A2	65	37.8923	35.4846	352.31	1311.72	1217.69	6
2	2	B2	97	34.9072	30.2614	301.247	1214.3	1052.19	6
3	2	C2	127	39.7559	36.1471	320.001	1373.9	1246.08	6
4	2	D2	101	44.0198	36.6453	323.485	1517.35	1256.47	6
1	3	A3	87	37.1954	35.0139	318.997	1286.55	1205.18	6
2	3	B3	95	32.1474	30.6	282.961	1116.39	1060.07	6
3	3	C3	101	43.0792	41.1436	339.32	1481.86	1402.06	6
4	3	D3	116	47.9224	39.4966	314.864	1652.41	1348.69	6
1	4	A4	100	46.99	37.5321	348.322	1616.28	1287.51	6
2	4	B4	91	45.1978	34.7906	329.57	1566.91	1200.58	6
3	4	C4	101	51.2871	32.4112	296.607	1777.01	1118.32	6
4	4	D4	104	44.6538	39.3922	303.572	1537.23	1355.31	6
1	5	A5	96	34.7812	35.2561	331.275	1202.32	1213.97	6
2	5	B5	102	45.9216	40.3732	310.478	1590.34	1391.71	6
3	5	C5	106	54.6226	40.964	306.053	1883.4	1407.37	6
4	5	D5	95	52.5053	38.1335	323.489	1814.04	1305.19	6
1	6	A6	90	34.9778	35.1306	310.259	1208.48	1212.73	6
2	6	B6	83	34.9036	33.4356	286.943	1210.05	1159.84	6
3	6	C6	102	56.3529	37.703	300.586	1944.61	1293.37	6
4	6	D6	91	25.1538	22.524	290.974	879.154	786.061	6
1	7	A7	85	33.0235	37.2533	311.755	1142.15	1281.65	6
2	7	B7	99	28.6061	24.6012	273.62	997.091	858.501	6
3	7	C7	104	52.5385	34.5023	310.385	1815.48	1187.78	6
4	7	D7	115	34.5391	28.0305	288.618	1200.19	971.839	6
1	8	A8	94	30.4255	36.1979	281.936	1049.51	1249.21	6
2	8	B8	102	45.5392	31.153	323.761	1580.74	1079.32	6
3	8	C8	114	52.0702	40.798	290.815	1793.51	1395.31	6
4	8	D8	91	40.011	33.7989	281.036	1392.69	1176.34	6
1	9	A9	94	49.9255	44.7716	323.946	1721.46	1537.6	6
2	9	B9	85	57.9059	49.693	284.613	1997.4	1714.48	6
3	9	C9	86	33.0465	30.5209	295.81	1146.9	1055.02	6
4	9	D9	85	39.5529	40.8043	301.497	1365.87	1402.71	6
1	10	A10	93	46.4731	37.4408	326.849	1600.81	1281.47	6
2	10	B10	108	38.463	35.024	288.994	1328.22	1200.18	6
3	10	C10	118	32.5678	27.1773	289.648	1135.16	945.4	6
4	10	D10	106	38.934	27.4487	276.295	1350.71	952.295	6
1	11	A11	80	41.9125	38.1573	314.873	1447.8	1310.22	6
2	11	B11	103	44.0971	32.5424	299.142	1528.03	1121.93	6
3	11	C11	85	38.1529	39.443	282.363	1327	1370.28	6
4	11	D11	51	38.2745	31.9832	310.206	1329.33	1105.58	3
1	12	A12	109	35.2018	33.1894	323.875	1218.92	1142.87	6
2	12	B12	81	55.2222	45.3561	347.72	1905.63	1560.13	6
3	12	C12	94	34.7447	32.9558	278.211	1204.55	1143.65	6

## Sheet: Feuil5
Result Info
Summary
Data Selection
4
5
6
7
20160314_XRCC1_MT-0221_2016.03.14.19.09.09 > 20150519 8&2gy (2016-04-05 15:34:44)
9
10
11
12
13
Download
Row	Col	WellName	Nuclei - Number of Objects	Nuclei - Number of Spots Selected- par noyau - Mean per Well	Nuclei - Number of Spots Selected- par noyau - StdDev per Well	Nuclei - Spot Background Intensity- Mean par noyau - Mean per Well	Nuclei - Spot Area [px²]- Sum par noyau - Mean per Well	Nuclei - Spot Area [px²]- Sum par noyau - StdDev per Well	Number of Analyzed Fields
1	1	A1	45	31.4667	32.402	306.143	1080.8	1109.25	6
2	1	B1	45	35.1778	35.8185	347.467	1207.07	1221.56	6
3	1	C1	61	43.0328	35.3605	352.009	1484.98	1210.28	6
4	1	D1	79	43.9241	41.5395	354.379	1512.94	1419.74	6
1	2	A2	65	54.3538	42.1368	346.417	1859.03	1429.56	6
2	2	B2	76	50.6053	38.6402	351.679	1747.63	1321.83	6
3	2	C2	59	56.8814	37.8514	330.866	1956.41	1285.1	6
4	2	D2	78	41.9103	34.5341	341.268	1449.55	1185.96	6
1	3	A3	56	45.7143	42.1101	315.068	1568.09	1437.63	6
2	3	B3	70	45.9429	36.2435	346.256	1591.43	1241.33	6
3	3	C3	65	48.8308	41.992	353.339	1680.34	1432.31	6
4	3	D3	63	62.9841	31.1627	366.512	2180.81	1066.76	6
1	4	A4	59	43.1017	39.0785	372.68	1478.53	1323.88	6
2	4	B4	69	51.2319	35.6643	334.782	1766.65	1212.45	6
3	4	C4	47	53.0213	30.9849	373.797	1841.21	1068.07	6
4	4	D4	88	49.3295	33.0084	356.715	1706.62	1134.02	6
1	5	A5	4	42	28.5774	260.202	1450	980.49	6
2	5	B5	78	44.4231	30.6855	385.539	1537.91	1047.51	6
3	5	C5	72	45.4583	31.5398	378.369	1576.83	1076.73	6
4	5	D5	66	52.8485	29.7984	345.381	1829.12	1011.35	6
1	6	A6	56	45.1786	44.4232	348.669	1551.04	1507.86	6
2	6	B6	50	45.02	32.9592	368.91	1557.42	1134.9	6
3	6	C6	88	39.1023	30.8586	356.692	1352.12	1060.02	6
4	6	D6	74	59.1757	34.7895	372.427	2043.62	1185.36	6
1	7	A7	48	45.625	44.3754	382.521	1568.79	1513.03	6
2	7	B7	59	36.4237	32.407	336.47	1259.56	1111.19	6
3	7	C7	75	72.52	37.9503	355.473	2495.15	1294.19	6
4	7	D7	71	51.0845	30.2861	343.623	1773.15	1044.61	6
1	8	A8	74	49.0135	39.4001	369.308	1687.47	1345.66	6
2	8	B8	63	32.873	26.5916	366.473	1142.57	920.369	6
3	8	C8	60	54.8167	34.0943	350.143	1890.15	1167.81	6
4	8	D8	63	58.1587	27.543	367.887	2011.25	941.379	6
1	9	A9	77	35.9351	29.0346	373.309	1247.1	997.464	6
2	9	B9	74	49.5135	31.1238	369.031	1713.12	1068.91	6
3	9	C9	78	51.3718	30.2278	343.169	1775.18	1030.08	6
4	9	D9	91	39.5934	26.0764	346.583	1376.8	898.284	6
1	10	A10	71	50.662	44.2128	321.999	1742.72	1506.4	6
2	10	B10	75	48.7867	31.8329	351.073	1686.71	1089.97	6
3	10	C10	69	59.6667	29.7992	327.589	2067.29	1011.33	6
4	10	D10	100	52.67	30.5621	378.549	1821.33	1044.33	6
1	11	A11	65	48.2154	43.2859	344.337	1661.28	1482.86	6
2	11	B11	54	45.8889	30.3698	348.267	1591.81	1050.1	6
3	11	C11	78	66.3077	31.1195	358.532	2292.71	1067.55	6
4	11	D11	92	48.3043	37.231	311.739	1663.16	1268.25	6
1	12	A12	53	54.0755	42.1197	368.103	1855.66	1433.53	6
2	12	B12	65	51.3077	33.2401	331.731	1772.42	1134.28	6
3	12	C12	66	62	33.8144	369.312	2144.83	1152.1	6
4	12	D12	76	53.3421	32.076	350.276	1843.59	1097.11	6

## Sheet: Feuil6
Result Info
Summary
Data Selection
4
5
6
7
8
20160314_XRCC1_MT-0220_2016.03.14.19.35.04 > 20150519 8&2gy (2016-04-05 15:31:29)
10
11
12
13
Download
Row	Col	WellName	Nuclei - Number of Objects	Nuclei - Number of Spots Selected- par noyau - Mean per Well	Nuclei - Number of Spots Selected- par noyau - StdDev per Well	Nuclei - Spot Background Intensity- Mean par noyau - Mean per Well	Nuclei - Spot Area [px²]- Sum par noyau - Mean per Well	Nuclei - Spot Area [px²]- Sum par noyau - StdDev per Well	Number of Analyzed Fields
1	1	A1	52	38.8462	33.3187	352.743	1331.42	1141.96	6
2	1	B1	55	39.5273	32.7351	315.666	1358.02	1116.44	6
3	1	C1	67	46.6567	36.9527	377.79	1608.46	1267.48	6
4	1	D1	55	46.4	46.5107	353.458	1592.64	1592.33	6
1	2	A2	64	44.75	40.5932	345.429	1533.77	1384.51	6
2	2	B2	74	48.0135	38.5282	404.17	1659.32	1327.67	6
3	2	C2	74	51.6351	36.8817	379.417	1786.32	1266.11	6
4	2	D2	72	52.9028	31.5716	409.908	1831.9	1080.98	6
1	3	A3	62	43.6452	36.5065	409.45	1506.42	1248.7	6
2	3	B3	78	44.5	35.6829	355.081	1539.73	1233.37	6
3	3	C3	64	48.9375	35.4714	359.245	1695.12	1220.42	6
4	3	D3	68	58.6765	33.7513	359.133	2036.63	1163.91	6
1	4	A4	68	43.6765	34.7629	385.786	1509.38	1189.23	6
2	4	B4	61	34.8852	29.5026	384.312	1214.77	1020.98	6
3	4	C4	73	63.9452	28.7754	412.747	2216.49	979.357	6
4	4	D4	61	57.1311	28.3205	385.003	1985.52	976.61	6
1	5	A5	45	38.5111	31.616	398.341	1337.93	1092.19	6
2	5	B5	58	45.0345	34.0454	402.748	1567.09	1187.1	6
3	5	C5	73	58.4795	32.8875	405.092	2030.21	1134.08	6
4	5	D5	61	66.3934	28.7734	405.201	2305.95	990.9	6
1	6	A6	63	53.8889	41.4262	404.615	1856.25	1412.48	6
2	6	B6	49	57.5918	36.0809	429.447	1997.53	1236.36	6
3	6	C6	55	43.2182	24.7339	402.712	1504.51	848.156	6
4	6	D6	82	52.3049	27.9668	424.525	1823.22	968.972	6
1	7	A7	71	30.3662	33.3939	367.236	1051.08	1152.5	6
2	7	B7	65	45.7692	30.4373	417.305	1600.23	1060.05	6
3	7	C7	87	47.7356	31.1316	345.369	1658.78	1075.59	6
4	7	D7	68	53.3235	25.531	359.983	1860.44	880.424	6
1	8	A8	68	40.6765	47.7282	329.353	1400.96	1641.58	6
2	8	B8	65	32.8308	31.9553	374.262	1142.95	1106.35	6
3	8	C8	77	55.8442	27.9789	371.263	1939.55	964.132	6
4	8	D8	80	53.25	34.0422	371.883	1853.31	1183.23	6
1	9	A9	59	48.0847	28.9704	393.377	1678.53	1006.08	6
2	9	B9	68	34.0735	32.4425	365.643	1184.75	1123.04	6
3	9	C9	74	68.8784	43.9339	388.622	2395.08	1524.12	6
4	9	D9	69	53.6087	26.8253	389.048	1868.71	925.26	6
1	10	A10	58	39.431	35.7251	400.183	1369.98	1241	6
2	10	B10	71	54.5775	31.4877	382.589	1886.32	1078.97	6
3	10	C10	76	50.5395	34.4079	376.057	1753.32	1185.04	6
4	10	D10	81	63.9383	25.8081	385.58	2218.99	887.913	6
1	11	A11	61	48.5574	41.9724	356.575	1662.95	1423.54	6
2	11	B11	72	41.6667	29.5659	395.188	1451.58	1024.7	6
3	11	C11	68	44.7941	28.2935	399.135	1561.18	983.911	6
4	11	D11	67	54.2239	25.7769	413.046	1887.01	886.901	6
1	12	A12	70	41.2857	37.4437	359.15	1429.19	1292.22	6
2	12	B12	71	67.1831	39.1405	381.738	2319.56	1342.19	6
3	12	C12	73	49.4658	34.7135	345.015	1716.82	1197.3	6
4	12	D12	70	54.8	31.2348	381.427	1912.83	1099.51	6

## Sheet: Feuil7
Result Info
Summary
Data Selection
4
5
6
7
8
9
20160314_XRCC1_MT-0219_2016.03.14.18.17.17 > 20150519 4fois2gy (2016-04-05 15:27:45)
11
12
13
Download
Row	Col	WellName	Nuclei - Number of Objects	Nuclei - Number of Spots Selected- par noyau - Mean per Well	Nuclei - Number of Spots Selected- par noyau - StdDev per Well	Nuclei - Spot Background Intensity- Mean par noyau - Mean per Well	Nuclei - Spot Area [px²]- Sum par noyau - Mean per Well	Nuclei - Spot Area [px²]- Sum par noyau - StdDev per Well	Number of Analyzed Fields
1	1	A1	39	40.3333	39.715	327.465	1226.23	1222.32	6
2	1	B1	44	41.4545	50.2443	311.392	1251.27	1534.31	6
3	1	C1	44	57.2045	60.2763	322.024	1802.55	1930.11	6
4	1	D1	43	30.8372	37.9799	317.092	957.907	1232.15	6
1	2	A2	37	48.1622	67.5535	315.847	1541.92	2196.65	6
2	2	B2	62	58.0645	58.5407	347.12	1970.4	1949.24	6
3	2	C2	82	52.8659	55.3078	338.086	1760.1	1864.36	6
4	2	D2	61	81.2131	80.0581	331.181	2675.26	2589.52	6
1	3	A3	47	53.9787	53.7367	348.283	1785.79	1786.89	6
2	3	B3	79	49.4937	54.3773	336.35	1594.72	1785.38	6
3	3	C3	79	39.1013	51.6739	341.146	1238.43	1638.1	6
4	3	D3	67	57.2537	51.0461	339.146	1834.76	1646.59	6
1	4	A4	77	35.3377	48.4913	329.333	1140.44	1605.96	6
2	4	B4	65	63.7538	63.4739	351.024	2086.77	2051.51	6
3	4	C4	52	73.5192	50.325	349.831	2424.04	1739.77	6
4	4	D4	73	57.4521	55.5848	348.777	1861.4	1832.06	6
1	5	A5	59	46.5593	55.5512	334.599	1525.56	1840.37	6
2	5	B5	65	54.1077	51.7594	343.009	1797.43	1733.39	6
3	5	C5	75	53.6	52.214	341.301	1745.51	1705.54	6
4	5	D5	62	57.8226	46.7889	349.964	1918.05	1562.61	6
1	6	A6	84	35.0119	40.3214	339.903	1140.02	1311.63	6
2	6	B6	75	54.1867	46.9487	348.769	1788.63	1547.27	6
3	6	C6	111	35.1081	42.2065	346.067	1189.37	1495.15	6
4	6	D6	83	42.8072	41.6133	356.674	1459.96	1431.1	6
1	7	A7	85	44.1059	49.0593	319.563	1389.36	1536.47	6
2	7	B7	96	41.4375	46.828	342.577	1372.08	1576.31	6
3	7	C7	92	45.2391	48.2576	351.991	1492.04	1587.04	6
4	7	D7	78	58.5641	49.3157	349.043	1988.28	1686.45	6
1	8	A8	104	29.3269	40.9353	336.536	933.596	1336.35	6
2	8	B8	89	38.2584	46.1075	338.249	1281.07	1595.55	6
3	8	C8	104	26.3654	32.0655	352.005	874.442	1087.26	6
4	8	D8	93	58.3011	44.8356	360.333	1954.4	1505.49	6
1	9	A9	100	35.45	32.288	336.994	1149.17	1076.49	6
2	9	B9	97	32.1856	35.4925	356.8	1080.04	1193.6	6
3	9	C9	119	28.605	34.7329	353.742	949.084	1175	6
4	9	D9	108	43.6389	40.9455	368.503	1535.91	1441.38	6
1	10	A10	98	24.0204	31.6567	336.437	773.602	1044.72	6
2	10	B10	89	36.4157	39.4392	353.436	1210.96	1326.04	6
3	10	C10	104	36.4712	37.0803	343.872	1218.82	1260.16	6
4	10	D10	111	51.8919	40.2791	362.843	1736.3	1385.58	6
1	11	A11	107	36.9813	45.4713	334.982	1199.5	1491.93	6
2	11	B11	99	33.6566	41.1813	354.334	1140.89	1403.55	6
3	11	C11	98	66.0102	54.9154	360.239	2198.45	1783.21	6
4	11	D11	87	54.7816	54.2184	347.338	1863.85	1868.57	6
1	12	A12	119	21.0756	29.9429	308.547	631.706	913.344	6
2	12	B12	104	23.7019	36.059	329.26	784.827	1224.08	6
3	12	C12	99	37.5859	47.8025	328.747	1244.71	1617.95	6
4	12	D12	113	49.9469	44.3073	344.931	1670.93	1490.23	6

## Sheet: Feuil8
Result Info
Summary
Data Selection
4
5
6
7
8
9
10
20160314_XRCC1_MT-0218_2016.03.14.18.43.13 > 20150519 4fois2gy (2016-04-05 15:23:14)
12
13
Download
Row	Col	WellName	Nuclei - Number of Objects	Nuclei - Number of Spots Selected- par noyau - Mean per Well	Nuclei - Number of Spots Selected- par noyau - StdDev per Well	Nuclei - Spot Background Intensity- Mean par noyau - Mean per Well	Nuclei - Spot Area [px²]- Sum par noyau - Mean per Well	Nuclei - Spot Area [px²]- Sum par noyau - StdDev per Well	Number of Analyzed Fields
1	1	A1	45	32.4222	38.7289	341.814	1072.53	1249.88	6
2	1	B1	51	62.7843	69.8897	295.756	1961.63	2212.19	6
3	1	C1	61	64.1803	59.8708	304.079	2112.66	2015.59	6
4	1	D1	70	58.8429	53.278	325.432	1934.84	1741.7	6
1	2	A2	49	70.7347	99.0919	312.693	2352.37	3226.26	6
2	2	B2	88	62.2841	57.0239	324.141	2064.91	1900.22	6
3	2	C2	73	72.9315	58.886	347.316	2520.7	2048.24	6
4	2	D2	82	61.5488	62.7035	349.65	2127.32	2155.6	6
1	3	A3	63	44.1429	60.9613	328.91	1494.14	1909.04	6
2	3	B3	75	70.88	63.0774	341.803	2440.8	2193.19	6
3	3	C3	62	55.9516	54.9723	349.15	1978.98	1898.64	6
4	3	D3	60	62.4333	56.0821	357.388	2271.02	2046.58	6
1	4	A4	60	43.3667	49.8479	340.082	1489.38	1724.17	6
2	4	B4	60	87.5667	62.81	343.894	3083.8	2244.38	6
3	4	C4	66	73.8485	60.4662	359.466	2729.23	2205.46	6
4	4	D4	66	72.1515	54.9117	361.192	2618.52	1956.48	6
1	5	A5	50	41.6	49.0518	329.199	1482.6	1787.97	6
2	5	B5	58	79.7931	56.8296	349.782	2789.5	2038.08	6
3	5	C5	68	59.7206	44.3429	365.533	2156.91	1639.71	6
4	5	D5	64	65.2031	49.0352	376.792	2390.11	1804.48	6
1	6	A6	94	26.3404	35.6704	333.61	937.511	1279.67	6
2	6	B6	92	51.4891	49.0793	352.216	1863.1	1815.1	6
3	6	C6	86	53.1279	49.7057	359.815	1934.28	1849.22	6
4	6	D6	92	51.6739	41.5862	352.641	1839.04	1506.2	6
1	7	A7	88	39.3864	40.7393	347.512	1376.99	1423.6	6
2	7	B7	105	49.8667	51.6639	355.635	1705.3	1730.44	6
3	7	C7	100	54.83	48.9564	348.404	1889.43	1705.31	6
4	7	D7	92	71.6304	46.916	348.261	2461.04	1603.14	6
1	8	A8	94	36.617	38.137	327.988	1274.6	1367.9	6
2	8	B8	123	57.1789	46.9414	367.11	2077.91	1720.56	6
3	8	C8	90	70.5667	43.6109	356.327	2478.58	1572.12	6
4	8	D8	110	50.3818	51.04	358.048	1713.49	1716.12	6
1	9	A9	101	33.9703	37.6482	335.993	1155.21	1309.71	6
2	9	B9	102	42.2157	47.5619	367.825	1545.57	1728.78	6
3	9	C9	121	34.8512	40.2467	347.699	1227.62	1452.57	6
4	9	D9	103	61.0485	48.287	355.894	2201.09	1774.02	6
1	10	A10	96	42.7917	49.5737	352.383	1451.61	1665.32	6
2	10	B10	102	48.7255	42.4421	367.214	1770.89	1562.12	6
3	10	C10	108	62.2222	49.3239	353.291	2189.98	1765.98	6
4	10	D10	98	56.6122	49.414	341.655	1953.05	1711.83	6
1	11	A11	114	37.4474	41.1834	344.911	1314.88	1456.43	6
2	11	B11	111	36.3964	42.9518	353.806	1250.68	1456.94	6
3	11	C11	107	49.6262	56.6784	351.467	1739.63	1965.36	6
4	11	D11	107	52.3364	49.7761	355.268	1868.85	1777.69	6
1	12	A12	95	39.6526	36.61	310.527	1274.65	1237.11	6
2	12	B12	119	47.2353	41.2462	341.381	1590.25	1408.39	6
3	12	C12	95	59.5684	47.9616	333.78	2023.58	1642.45	6
4	12	D12	93	58.3333	57.2839	327.133	2001.46	1957.24	6

## Sheet: Feuil9
Result Info
Summary
Data Selection
4
5
6
7
8
9
10
11
20160314_XRCC1_MT-0217_2016.03.14.17.25.27 > 20150519 4fois2gy (2016-04-05 15:18:24)
13
Download
Row	Col	WellName	Nuclei - Number of Objects	Nuclei - Number of Spots Selected- par noyau - Mean per Well	Nuclei - Number of Spots Selected- par noyau - StdDev per Well	Nuclei - Spot Background Intensity- Mean par noyau - Mean per Well	Nuclei - Spot Area [px²]- Sum par noyau - Mean per Well	Nuclei - Spot Area [px²]- Sum par noyau - StdDev per Well	Number of Analyzed Fields
1	1	A1	51	59.2353	54.4182	265.064	1707.98	1602.01	6
2	1	B1	40	65.875	76.8509	278.485	1997.42	2312.6	6
3	1	C1	46	67.1957	39.8985	280.6	2034.78	1241.69	6
4	1	D1	56	59.7143	39.1931	277.471	1815.79	1195.33	6
1	2	A2	44	68.7955	40.4346	274.621	2032.07	1263.42	6
2	2	B2	48	47.8333	50.1225	288.247	1539.88	1573.79	6
3	2	C2	56	59.7857	39.6203	286.741	1812.25	1154.63	6
4	2	D2	46	77.1522	39.6608	286.969	2411.28	1340.96	6
1	3	A3	55	59.3818	48.6048	282.542	1871.07	1557.94	6
2	3	B3	68	52.1324	35.6341	292.955	1695.9	1177.54	6
3	3	C3	70	41.4857	29.9685	292.942	1382.47	1031.2	6
4	3	D3	55	54.7091	33.3803	295.008	1752.93	1067.7	6
1	4	A4	60	46.7333	39.9287	284.685	1459.83	1251.37	6
2	4	B4	64	33.125	26.5345	285.545	1069.95	893.555	6
3	4	C4	62	56.6935	33.8563	301.88	1861.47	1141.42	6
4	4	D4	67	49.1791	33.2479	301.993	1649.18	1105.47	6
1	5	A5	68	53.0294	43.5626	281.742	1656.43	1375.45	6
2	5	B5	74	40.7838	36.7741	291.706	1386.45	1303.1	6
3	5	C5	67	45.5224	31.383	295.627	1467.67	1013.1	6
4	5	D5	66	39.7576	29.7554	301.063	1344	1018.58	6
1	6	A6	79	53.8228	43.2941	291.728	1749.54	1442.75	6
2	6	B6	86	38.7209	30.1138	312.207	1352.48	1072.29	6
3	6	C6	94	55.2128	35.3845	312.359	1889.29	1274.69	6
4	6	D6	91	54.4725	32.857	310.934	1895.27	1172.76	6
1	7	A7	92	44.0543	35.3443	301.89	1443.84	1182.01	6
2	7	B7	98	51.9898	35.2974	308.175	1760.95	1303.16	6
3	7	C7	105	57.3048	33.4682	315.933	1991.13	1179.58	6
4	7	D7	116	36.3534	27.8116	309.683	1239.58	964.272	6
1	8	A8	113	40.646	33.0651	308.409	1365.42	1173.74	6
2	8	B8	101	33.7822	30.6547	300.604	1131.87	1079.09	6
3	8	C8	96	47.0521	29.1592	311.219	1622.61	1027.52	6
4	8	D8	118	41.322	37.3193	308.279	1404.08	1264	6
1	9	A9	81	48.0247	41.512	318.077	1643.63	1398.57	6
2	9	B9	90	37.0778	30.5457	316.247	1275.3	1082.3	6
3	9	C9	118	26.6441	24.2323	313.874	929.856	841.214	6
4	9	D9	125	28.2	30.3496	300.599	955.368	1041.94	6
1	10	A10	117	27.2479	31.1896	308.283	931.778	1072.43	6
2	10	B10	106	40.2453	35.497	298.03	1352.19	1189.92	6
3	10	C10	121	44.6116	35.4359	309.793	1546.85	1256.43	6
4	10	D10	106	41.6887	38.3479	318.722	1454.23	1360.99	6
1	11	A11	90	27.1889	33.7848	310.919	888.078	1081.74	6
2	11	B11	110	33.1818	34.1229	297.513	1112.94	1149.86	6
3	11	C11	115	30.2957	29.2185	312.744	1085.81	1058.92	6
4	11	D11	115	40.1652	34.5543	310.539	1419.94	1209.5	6
1	12	A12	97	43.1753	37.8899	303.648	1370.98	1214.23	6
2	12	B12	99	41.8687	33.0537	293.406	1336.95	1075.9	6
3	12	C12	111	44.4054	33.4018	306.664	1520.03	1175.88	6
4	12	D12	117	40.7607	31.1879	310.338	1410.11	1109.01	6

[truncated: 6 more sheets: Feuil10, Feuil11, Feuil12, Feuil13, Feuil14, Feuil15]
