# Supplementary material for: The out-of-field dose in radiation therapy induces delayed tumorigenesis by senescence evasion
Source: eLife. 2022 Mar 18;11:e67190. doi: 10.7554/eLife.67190 (PMC8933005; doi:10.7554/eLife.67190)
Supplement: Figure 5—figure supplement 2—source data 2. [file elife-67190-fig5-figsupp2-data2.xlsx]

## Sheet: Feuil1
Result Info
Summary
3
20160314_53BP1_MT-0216_2016.03.14.17.38.43 > 20150519 MTomezak XRCC1 (2016-04-05 15:48:05)
5
6
7
8
9
10
11
12
13
Download
Row	Col	WellName	Nuclei - Number of Objects	Nuclei - Number of Spots Selected- par noyau - Mean per Well	Nuclei - Number of Spots Selected- par noyau - StdDev per Well	Nuclei - Spot Background Intensity- Mean par noyau - Mean per Well	Nuclei - Spot Area [px²]- Sum par noyau - Mean per Well	Nuclei - Spot Area [px²]- Sum par noyau - StdDev per Well	Number of Analyzed Fields
5	1	E1	65	7.15385	7.41879	861.567	259.831	268.674	6
6	1	F1	72	7.97222	10.7467	941.192	288.806	387.714	6
7	1	G1	75	3.21333	5.83163	780.882	116.893	211.131	6
8	1	H1	73	2.54795	5.09368	886.156	92.4795	184.498	6
5	2	E2	100	4.77	6.03333	782.806	173.74	219.352	6
6	2	F2	84	6.29762	7.51509	887.773	229.679	272.589	6
7	2	G2	46	2.69565	4.40136	647.036	98.6522	160.982	6
8	2	H2	58	1.39655	3.12848	842.277	51.3103	114.968	6
5	3	E3	75	4.53333	6.02098	944.506	164.973	217.505	6
6	3	F3	97	4.29897	5.34471	837.978	156.959	194.322	6
7	3	G3	63	6.44444	9.94951	982.612	234.079	357.835	6
8	3	H3	62	2.96774	4.87539	882.088	108.597	178.215	6
5	4	E4	78	3.91026	5.4966	901.218	142.538	199.943	6
6	4	F4	106	3.70755	5.18784	937.514	135.038	188.174	6
7	4	G4	60	4.68333	6.34727	824.198	170.233	230.032	6
8	4	H4	81	4.28395	5.43883	788.6	155.84	196.503	6
5	5	E5	101	5.63366	7.10454	933.05	205.485	258.111	6
6	5	F5	105	3.67619	5.10561	766.287	134.314	186.465	6
7	5	G5	72	3.125	5.09885	1021.26	114.333	186.738	6
8	5	H5	55	6.32727	5.3231	993.224	230.164	192.831	6
5	6	E6	122	2.96721	3.6679	1389.05	107.705	132.061	6
6	6	F6	92	2.15217	2.82817	1649.69	79.0761	103.973	6
7	6	G6	103	2.35922	2.62661	1503.47	86.5146	96.1171	6
8	6	H6	110	2.36364	3.40191	1739.74	86.5273	124.132	6
5	7	E7	127	1.15748	1.87051	1734.33	42.2756	67.8382	6
6	7	F7	123	1	2.09214	1882.5	35.6911	72.6853	6
7	7	G7	125	1.184	2.06501	1418.72	42.992	74.8085	6
8	7	H7	95	1.57895	3.28627	1911.31	57.2	116.012	6
5	8	E8	140	0.478571	1.00694	1806.37	17.5786	37.104	6
6	8	F8	105	1.09524	1.70138	1178.06	39.6667	60.9966	6
7	8	G8	92	0.945652	1.73752	1066.43	34.3804	63.0656	6
8	8	H8	91	1.65934	3.092	1437.5	59.5934	109.776	6
5	9	E9	132	0.590909	1.18486	1599.76	21.5227	42.718	6
6	9	F9	111	0.990991	2.11701	2114.66	36.1712	76.3391	6
7	9	G9	143	0.762238	1.58762	1574.08	27.7343	57.1026	6
8	9	H9	92	1.02174	2.28217	1837.19	37.3587	81.6409	6
5	10	E10	117	1.47863	4.83806	1777.47	53.1709	169.668	6
6	10	F10	131	0.824427	2.24459	2366.92	30.0305	81.8394	6
7	10	G10	117	0.991453	1.63209	2347.87	36.1453	58.6764	6
8	10	H10	158	0.468354	1.89425	2044.54	16.9051	67.223	6
5	11	E11	125	0.44	0.962188	1915.04	16.176	35.3079	6
6	11	F11	141	0.950355	2.41521	1997.11	33.9433	84.8458	6
7	11	G11	114	0.912281	2.15982	1917.84	32.8684	75.8615	6
8	11	H11	110	0.318182	0.728601	1881.95	11.6545	26.5193	6
5	12	E12	140	0.664286	1.15435	2294.76	24.1071	41.5854	6
6	12	F12	118	0.661017	1.03131	2367.72	23.9576	37.4276	6
7	12	G12	130	0.730769	0.994469	2428.69	26.7231	36.1839	6
8	12	H12	114	0.22807	0.532735	2039.2	8.35088	19.5099	6

## Sheet: Feuil2
Result Info
Summary
3
4
20160314_53BP1_MT-0217_2016.03.14.17.12.48 > 20150519 MTomezak XRCC1 (2016-04-05 15:50:24)
6
7
8
9
10
11
12
13
Download
Row	Col	WellName	Nuclei - Number of Objects	Nuclei - Number of Spots Selected- par noyau - Mean per Well	Nuclei - Number of Spots Selected- par noyau - StdDev per Well	Nuclei - Spot Background Intensity- Mean par noyau - Mean per Well	Nuclei - Spot Area [px²]- Sum par noyau - Mean per Well	Nuclei - Spot Area [px²]- Sum par noyau - StdDev per Well	Number of Analyzed Fields
5	1	E1	55	7.03636	8.55042	716.419	253.873	307.191	6
6	1	F1	58	7.24138	8.29777	724.311	262.724	299.406	6
7	1	G1	54	5.87037	7.99067	933.341	213.204	288.926	6
8	1	H1	63	4.36508	8.17609	797.213	156.698	287.317	6
5	2	E2	76	6.42105	7.70673	793.541	233.5	277.841	6
6	2	F2	72	8.51389	9.38833	761.335	308.556	337.191	6
7	2	G2	59	4.62712	4.66793	753.934	169.271	170.249	6
8	2	H2	66	7.15152	9.49857	805.281	259.227	341.267	6
5	3	E3	72	6.125	7.58972	948.76	223.222	275.568	6
6	3	F3	78	4.19231	4.97802	1016.08	153.615	181.839	6
7	3	G3	59	5.01695	7.93832	850.747	182.915	287.971	6
8	3	H3	81	3.30864	4.63854	645.799	120.864	169.46	6
5	4	E4	69	6.68116	7.23044	965.082	242.449	260.896	6
6	4	F4	79	4.87342	5.40505	941.266	177.835	196.692	6
7	4	G4	63	4.98413	6.59788	1063.26	180.937	238.973	6
8	4	H4	69	4.01449	6.26027	1143.23	146.928	228.048	6
5	5	E5	77	6.68831	6.50558	1034.16	243.675	237.327	6
6	5	F5	75	4.36	5.31098	1066.83	158.987	192.373	6
7	5	G5	80	4.35	4.88112	1000.89	159.188	178.195	6
8	5	H5	63	4.33333	5.24251	1109.15	158.222	190.23	6
5	6	E6	97	3.6701	3.58155	1518.65	133.866	128.575	6
6	6	F6	99	2.33333	2.79212	1572.2	85.2727	101.566	6
7	6	G6	93	2.35484	2.97689	1469.38	86.3548	108.902	6
8	6	H6	98	1.61224	2.45635	1727.52	59.2755	90.261	6
5	7	E7	131	2.9771	4.79818	1337.59	106.84	167.555	6
6	7	F7	122	1.45902	1.89016	1634.51	53.3689	69.0429	6
7	7	G7	114	1.80702	3.67935	1531.05	65.5	131.281	6
8	7	H7	92	1	1.61041	1891.38	36.7717	59.2714	6
5	8	E8	118	3.02542	5.7801	1410.36	107.949	205.169	6
6	8	F8	113	1.13274	1.53241	1661.64	41.3186	55.5042	6
7	8	G8	106	1.06604	1.71974	1747.13	38.6415	59.8677	6
8	8	H8	108	0.722222	2.44121	2070.9	26.3611	89.1759	6
5	9	E9	134	2.01493	4.06893	1349.65	72.694	144.962	6
6	9	F9	120	0.408333	0.824986	1724.06	14.95	29.9004	6
7	9	G9	129	1.17054	3.88129	1546.88	42.1163	135.757	6
8	9	H9	90	0.344444	0.638839	2506.48	12.6	23.2726	6
5	10	E10	131	2.64885	5.03209	1410.77	93.1374	173.783	6
6	10	F10	164	0.554878	1.64393	1795.57	20.0305	58.8529	6
7	10	G10	129	0.860465	1.86558	1898.76	30.9457	66.0503	6
8	10	H10	137	0.270073	0.790603	1513.49	9.83212	28.5182	6
5	11	E11	122	2.09836	4.67172	1374.28	74.3607	165.089	6
6	11	F11	122	0.729508	1.36083	2121.34	26.6311	49.5796	6
7	11	G11	121	0.752066	1.32464	1948.7	27.1736	47.1732	6
8	11	H11	107	0.299065	0.742446	2180.36	10.9533	27.1006	6
5	12	E12	117	2.23932	3.16677	1344.11	78.9658	107.492	6
6	12	F12	96	1.52083	2.76436	1475.42	54.8125	97.8902	6
7	12	G12	125	1.576	5.47614	1810.78	56.592	197.111	6
8	12	H12	100	1.02	3.71179	2048	36.63	131.383	6

## Sheet: Feuil3
Result Info
Summary
3
4
5
20160314_53BP1_MT-0218_2016.03.14.18.30.34 > 20150519 MTomezak XRCC1 (2016-04-05 15:53:07)
7
8
9
10
11
12
13
Download
Row	Col	WellName	Nuclei - Number of Objects	Nuclei - Number of Spots Selected- par noyau - Mean per Well	Nuclei - Number of Spots Selected- par noyau - StdDev per Well	Nuclei - Spot Background Intensity- Mean par noyau - Mean per Well	Nuclei - Spot Area [px²]- Sum par noyau - Mean per Well	Nuclei - Spot Area [px²]- Sum par noyau - StdDev per Well	Number of Analyzed Fields
5	1	E1	43	2.23256	2.38884	1732.15	80.0233	85.4198	6
6	1	F1	64	1.85938	4.89206	2285.05	66.6875	174.157	6
7	1	G1	36	1.36111	2.35618	1919.19	48.1944	82.8795	6
8	1	H1	59	0.322034	1.00757	1585.24	11.4068	34.9946	6
5	2	E2	74	3.82432	6.35342	1910.58	135.878	224.461	6
6	2	F2	78	2.44872	3.83642	2255.01	88.1538	137.543	6
7	2	G2	71	2.67606	4.57875	1558.97	96.6056	164.027	6
8	2	H2	60	1.3	1.71039	2191.51	47.3833	62.517	6
5	3	E3	88	2.64773	3.50382	1709.43	95.2614	124.205	6
6	3	F3	84	3.35714	8.61722	1776.9	120.393	302.238	6
7	3	G3	82	1.60976	1.83085	2234.89	58.1707	66.3172	6
8	3	H3	71	1	1.70713	1988.65	36.1268	60.9894	6
5	4	E4	85	2.74118	3.55619	2038.81	97.9412	127.616	6
6	4	F4	67	4.16418	6.48214	2224.22	150.254	233.906	6
7	4	G4	62	3.24194	5.33066	1724.18	117.129	192.07	6
8	4	H4	67	1.89552	3.33546	1882.41	69.0746	121.483	6
5	5	E5	79	3.25316	7.10267	2089.99	116.38	250.132	6
6	5	F5	90	3.22222	5.53392	1788.15	115.022	198.223	6
7	5	G5	76	2.71053	3.24886	2082.15	97.1974	117.499	6
8	5	H5	64	1.01562	1.50652	1788.11	36.4219	54.5489	6
5	6	E6	116	2.36207	9.2974	1893.78	83.6207	325.903	6
6	6	F6	116	1.26724	1.82903	1873.67	45.5603	65.2927	6
7	6	G6	115	1.6087	3.89037	2002.24	57.8087	138.467	6
8	6	H6	75	1.65333	8.25193	2556.7	57.7467	280.635	6
5	7	E7	126	1.65873	4.11663	1853.8	59.1667	147.05	6
6	7	F7	125	1.496	5.14723	1686.27	52.84	176.529	6
7	7	G7	103	0.640777	1.4132	1635.42	22.7282	49.5094	6
8	7	H7	91	0.659341	1.13744	1980.35	23.4835	40.2891	6
5	8	E8	137	1	1.70207	2073.46	36.0292	61.9883	6
6	8	F8	143	1.61538	5.99286	2293.08	57.3497	208.031	6
7	8	G8	115	1.51304	4.86009	1598.09	53.3217	171.328	6
8	8	H8	106	0.490566	0.918024	2387.32	17.7547	32.8983	6
5	9	E9	122	0.819672	1.52129	1544.86	29.1557	52.7893	6
6	9	F9	120	1.21667	2.84379	1779.8	43.6083	102.153	6
7	9	G9	110	0.763636	1.58506	2017.88	27.6091	58.0245	6
8	9	H9	96	1.1875	3.82873	1413.2	42.4271	138.299	6
5	10	E10	104	1.65385	8.03967	2016.11	57.6154	269.425	6
6	10	F10	135	0.688889	1.83037	1918.46	25.0593	67.1884	6
7	10	G10	110	1.08182	1.69798	1915.19	38.7182	61.3954	6
8	10	H10	125	0.552	0.911008	2247.4	19.984	32.9861	6
5	11	E11	129	0.852713	2.19766	2142.5	30.876	79.8284	6
6	11	F11	111	0.756757	1.40917	1751.62	26.9369	50.1005	6
7	11	G11	123	0.617886	1.05209	2211.08	22.2033	37.9827	6
8	11	H11	114	0.535088	2.18271	2144.68	19.114	78.9647	6
5	12	E12	106	0.745283	0.995813	1682.96	26.4528	35.4788	6
6	12	F12	140	0.864286	4.5157	1690.65	30.6286	159.258	6
7	12	G12	147	0.721088	2.39515	1598.69	25.6463	83.5867	6
8	12	H12	111	0.657658	1.41097	1057.06	22.973	49.0661	6

## Sheet: Feuil4
Result Info
Summary
3
4
5
6
20160314_53BP1_MT-0219_2016.03.14.18.04.39 > 20150519 MTomezak XRCC1 (2016-04-05 15:55:22)
8
9
10
11
12
13
Download
Row	Col	WellName	Nuclei - Number of Objects	Nuclei - Number of Spots Selected- par noyau - Mean per Well	Nuclei - Number of Spots Selected- par noyau - StdDev per Well	Nuclei - Spot Background Intensity- Mean par noyau - Mean per Well	Nuclei - Spot Area [px²]- Sum par noyau - Mean per Well	Nuclei - Spot Area [px²]- Sum par noyau - StdDev per Well	Number of Analyzed Fields
5	1	E1	55	1.65455	2.54746	1410.59	59.4182	89.61	6
6	1	F1	47	3.80851	4.85278	1757.48	135.957	175.699	6
7	1	G1	64	2.23438	2.88808	1680.36	80.7188	104.867	6
8	1	H1	63	2.8254	5.13225	1584.21	101.444	186.399	6
5	2	E2	63	1.92063	2.65367	1716.6	68.873	93.7761	6
6	2	F2	66	2.39394	2.83863	1931.42	85.5	100.957	6
7	2	G2	71	2.64789	5.09369	2024.78	94.8451	181.324	6
8	2	H2	65	4.12308	6.42628	1874.32	147.477	231.711	6
5	3	E3	102	1.7549	2.44721	1934.23	63.6667	88.0899	6
6	3	F3	77	3.67532	4.01786	1818.38	131.312	142.499	6
7	3	G3	72	2.79167	3.84538	1798.13	100.681	137.499	6
8	3	H3	78	2.5641	4.57148	1681.96	90.8974	161.165	6
5	4	E4	70	3.04286	5.32545	1739.28	108.6	189.025	6
6	4	F4	76	3.69737	4.57244	1977.19	131.737	162.083	6
7	4	G4	82	2.79268	6.26323	1486.15	100.024	223.837	6
8	4	H4	57	2.98246	4.05538	1354.16	106	145.315	6
5	5	E5	85	2.25882	2.91202	1873.15	79.5412	100.473	6
6	5	F5	91	1.47253	2.01296	1681.66	52.7802	71.476	6
7	5	G5	80	3.15	6.16051	1680.73	111.075	212.444	6
8	5	H5	64	2.82812	5.69755	2525.88	99.8125	196.566	6
5	6	E6	103	1.73786	6.73731	2064.07	61.3883	232.74	6
6	6	F6	86	1.15116	1.53789	1765.75	40.8837	54.8372	6
7	6	G6	87	1.68966	2.76317	1862.6	60.2759	98.6087	6
8	6	H6	86	1.73256	6.58237	1511.9	60.5814	226.846	6
5	7	E7	100	0.82	1.57236	2576.89	29	56.7201	6
6	7	F7	124	1.32258	3.64602	2109.3	45.6855	121.356	6
7	7	G7	87	2.70115	6.20599	1742.04	93.7931	214.239	6
8	7	H7	79	1.8481	5.58865	2001.52	64.3418	194.874	6
5	8	E8	115	0.852174	2.47883	2120.6	30.1652	89.296	6
6	8	F8	117	1.05128	2.85526	1815.68	37.453	100.497	6
7	8	G8	139	0.719424	1.1166	2399.73	25.554	39.7144	6
8	8	H8	122	0.57377	0.995179	1847.14	19.9918	34.3832	6
5	9	E9	113	1.13274	1.85888	1718.89	39.7257	64.961	6
6	9	F9	89	0.58427	1.17559	2799.1	20.8876	40.5041	6
7	9	G9	117	0.948718	1.55278	1945.45	33.359	52.7508	6
8	9	H9	118	0.533898	1.26547	2189.18	18.822	43.8992	6
5	10	E10	114	0.447368	0.86313	1734.94	16.0351	30.7009	6
6	10	F10	117	0.752137	1.99959	1873.16	26.8205	71.3489	6
7	10	G10	141	0.659574	1.10084	2242.84	23.7021	39.6452	6
8	10	H10	110	0.690909	2.68788	2159.7	24.7273	98.1732	6
5	11	E11	111	0.954955	1.86053	2029.26	33.5315	64.9828	6
6	11	F11	119	0.613445	1.75687	2299.18	21.9076	62.1131	6
7	11	G11	103	1.33981	5.00304	1981.78	47.2816	173.382	6
8	11	H11	107	0.672897	1.67544	2324.78	23.7757	60.7509	6
5	12	E12	152	0.782895	4.19542	2180.63	27.5395	145.042	6
6	12	F12	111	0.603604	1.50924	1907.3	21.036	50.6025	6
7	12	G12	113	1.04425	2.93802	1319.2	36.8673	104.92	6
8	12	H12	138	0.34058	0.891946	1481.01	12.0217	31.4433	6

## Sheet: Feuil5
Result Info
Summary
3
4
5
6
7
20160314_53BP1_MT-0220_2016.03.14.19.22.26 > 20150519 MTomezak XRCC1 (2016-04-05 15:57:36)
9
10
11
12
13
Download
Row	Col	WellName	Nuclei - Number of Objects	Nuclei - Number of Spots Selected- par noyau - Mean per Well	Nuclei - Number of Spots Selected- par noyau - StdDev per Well	Nuclei - Spot Background Intensity- Mean par noyau - Mean per Well	Nuclei - Spot Area [px²]- Sum par noyau - Mean per Well	Nuclei - Spot Area [px²]- Sum par noyau - StdDev per Well	Number of Analyzed Fields
5	1	E1	53	10.0943	10.1437	966.622	355.792	355.098	6
6	1	F1	47	12.3191	9.49166	1030.84	433.043	329.915	6
7	1	G1	60	17.3833	12.1461	1024.75	607.617	418.288	6
8	1	H1	46	7.6087	6.71144	1087.58	266.717	234.979	6
5	2	E2	63	14.9524	10.6641	1035.05	527.476	367.991	6
6	2	F2	75	14.36	11.1714	960.753	503.213	382.35	6
7	2	G2	79	18.4684	9.91481	992.361	645.203	340.294	6
8	2	H2	81	12.3333	11.2127	1190.96	435.235	391.985	6
5	3	E3	82	20.6098	10.1905	1009.7	717.244	346.971	6
6	3	F3	71	18.338	9.90374	1053.25	642.662	339.672	6
7	3	G3	51	8.45098	8.85057	944.451	300.039	311.411	6
8	3	H3	62	13.1452	9.60506	1118.56	465.081	338.525	6
5	4	E4	69	11.7101	8.35447	895.494	416.667	293.149	6
6	4	F4	82	19.8293	9.95521	974.998	692.305	344.106	6
7	4	G4	91	17.7802	9.80794	1099.87	624.165	338.234	6
8	4	H4	48	12.625	11.8171	1248.23	446.833	413.164	6
5	5	E5	78	20.6667	9.99307	998.181	729.308	346.736	6
6	5	F5	70	20.8429	11.3286	878.756	734.457	391.279	6
7	5	G5	58	20.5517	7.42961	1293.06	726.534	259.362	6
8	5	H5	41	13.1707	10.6064	1427.02	468.683	373.614	6
5	6	E6	92	10.9565	5.40637	1678.4	396.5	194.289	6
6	6	F6	69	10.7246	6.33822	1553.4	386.681	226.521	6
7	6	G6	80	10.4375	6.24164	1882.83	375.562	221.846	6
8	6	H6	60	8.05	6.02375	1860.43	289.533	215.56	6
5	7	E7	93	6.68817	5.0303	1740.64	243.032	178.571	6
6	7	F7	85	7.22353	4.06019	1713.54	258.635	141.23	6
7	7	G7	112	9.91964	7.34864	2503.22	357.321	254.627	6
8	7	H7	60	4.7	3.90697	2193.64	170.167	141.333	6
5	8	E8	91	4.13187	3.45835	2032.29	149.956	123.237	6
6	8	F8	100	4.22	3.45704	2219.76	153.36	124.308	6
7	8	G8	70	5.85714	5.2206	2346.17	208.643	179.776	6
8	8	H8	69	4.95652	4.33669	2092.89	177.609	151.329	6
5	9	E9	82	3.52439	2.62102	2132.72	127.622	93.9993	6
6	9	F9	78	3.58974	2.73712	2328.39	129.846	98.7559	6
7	9	G9	83	4.53012	4.67306	3010.83	162.892	162.978	6
8	9	H9	69	2.21739	2.35065	2761.51	80.4493	84.4487	6
5	10	E10	58	3.37931	3.19993	2108.87	119.897	108.762	6
6	10	F10	88	3.02273	2.40678	2049.94	108.398	85.5932	6
7	10	G10	87	2.97701	2.28736	2721.89	107.701	82.2788	6
8	10	H10	68	1.86765	1.86807	3663.66	67.7941	67.1769	6
5	11	E11	84	1.83333	2.45849	2499.75	65.5238	81.8543	6
6	11	F11	89	2.35955	3.13792	2988.87	85.0225	110.574	6
7	11	G11	86	2.34884	4.34069	2915.81	84.0581	153.653	6
8	11	H11	64	1.71875	2.38693	2323.62	60.4688	82.0834	6
5	12	E12	70	2.84286	3.98052	2568.08	99	131.715	6
6	12	F12	70	1.92857	1.90591	2730.53	69.4286	68.0325	6
7	12	G12	58	2.43103	2.62319	3166.89	86.1034	89.3416	6
8	12	H12	76	1.94737	2.59175	2980.99	69.4342	89.2794	6

## Sheet: Feuil6
Result Info
Summary
3
4
5
6
7
8
20160314_53BP1_MT-0221_2016.03.14.18.56.31 > 20150519 MTomezak XRCC1 (2016-04-05 15:59:55)
10
11
12
13
Download
Row	Col	WellName	Nuclei - Number of Objects	Nuclei - Number of Spots Selected- par noyau - Mean per Well	Nuclei - Number of Spots Selected- par noyau - StdDev per Well	Nuclei - Spot Background Intensity- Mean par noyau - Mean per Well	Nuclei - Spot Area [px²]- Sum par noyau - Mean per Well	Nuclei - Spot Area [px²]- Sum par noyau - StdDev per Well	Number of Analyzed Fields
5	1	E1	64	13.7344	13.621	841.338	475.328	465.622	6
6	1	F1	71	10.8451	11.7213	951.453	378.352	406.191	6
7	1	G1	60	9.48333	11.2257	793.603	334.35	390.729	6
8	1	H1	46	6.71739	7.80217	903.157	239.217	272.716	6
5	2	E2	76	17.2895	13.9607	969.44	603.711	480.428	6
6	2	F2	73	19.3151	10.4747	979.729	673.233	362.373	6
7	2	G2	105	15.8667	11.8127	948.755	554.305	405.24	6
8	2	H2	67	14.1194	10.2344	1102.41	499.463	359.069	6
5	3	E3	76	13.6053	8.70567	951.63	480.355	303.315	6
6	3	F3	102	16.3824	11.3041	836.499	568.49	388.195	6
7	3	G3	98	14.8469	10.8041	949.091	520.316	371.35	6
8	3	H3	50	12.82	11.1496	1112.52	452.48	389.489	6
5	4	E4	63	14.3968	10.7171	876.225	504.365	370.422	6
6	4	F4	86	17.093	13.6007	876.845	594.047	469.271	6
7	4	G4	93	16.3441	10.9122	973.485	572.581	379.504	6
8	4	H4	47	12.9362	11.414	1140.33	454.021	397.273	6
5	5	E5	82	19.3049	10.306	1109.95	679.988	354.59	6
6	5	F5	73	17.4384	10.0041	1107.12	618.466	351.784	6
7	5	G5	90	13.7111	10.1508	994.821	485.956	353.646	6
8	5	H5	68	10.3088	9.26115	1130.62	366.059	326.427	6
5	6	E6	86	9.54651	5.70996	1683.9	344.756	204.362	6
6	6	F6	99	11.3333	6.45234	1687.1	406.758	229.085	6
7	6	G6	93	10.7419	5.25213	1944.62	387.258	187.499	6
8	6	H6	75	9.6	6.4326	1845.63	345.24	224.695	6
5	7	E7	86	7.69767	4.06729	2050.55	277.814	142.509	6
6	7	F7	67	6.9403	3.61345	1986.97	252.134	131.465	6
7	7	G7	79	5.67089	3.6223	2052.54	205.57	131.088	6
8	7	H7	98	5.47959	4.17462	2333.53	198.704	148.406	6
5	8	E8	96	4.72917	4.85252	2343.51	170.781	170.628	6
6	8	F8	111	5.55856	4.47353	2332.15	199.892	159.422	6
7	8	G8	90	4.92222	2.86877	2333.82	178.356	102.866	6
8	8	H8	76	3.84211	3.01575	2962.89	140.105	109.202	6
5	9	E9	83	4.04819	4.06023	2223.93	144.614	138.836	6
6	9	F9	97	3.95876	2.67674	2618.49	143.794	97.303	6
7	9	G9	91	4.52747	3.14586	2436.27	164.198	112.872	6
8	9	H9	66	3.0303	1.99977	3338.74	110.348	72.4383	6
5	10	E10	73	2.57534	2.409	2139.77	93.4384	87.1544	6
6	10	F10	80	3.3125	2.16762	2580.37	119.838	77.8851	6
7	10	G10	69	2.75362	2.03936	3096.43	99.3623	71.3065	6
8	10	H10	80	1.975	2.1107	3025.16	71.55	74.6329	6
5	11	E11	65	1.75385	1.58144	2074.86	63.8769	58.1527	6
6	11	F11	70	1.64286	1.68571	2202.79	58.7714	59.4177	6
7	11	G11	83	2.56627	2.26959	2744.28	92.1687	79.4547	6
8	11	H11	73	1.76712	2.15071	3001.37	63.1644	73.9063	6
5	12	E12	71	2.56338	2.71363	1752.86	89.6479	94.1432	6
6	12	F12	78	2.92308	4.4394	2461.24	103.859	155.722	6
7	12	G12	80	2.025	2.26685	3118.37	72.275	78.1438	6
8	12	H12	74	1.86486	2.93456	2851.35	64.527	94.5715	6

## Sheet: Feuil7
Result Info
Summary
3
4
5
6
7
8
9
20160314_53BP1_MT-0222_2016.03.14.20.14.18 > 20150519 MTomezak XRCC1 (2016-04-05 16:02:44)
11
12
13
Download
Row	Col	WellName	Nuclei - Number of Objects	Nuclei - Number of Spots Selected- par noyau - Mean per Well	Nuclei - Number of Spots Selected- par noyau - StdDev per Well	Nuclei - Spot Background Intensity- Mean par noyau - Mean per Well	Nuclei - Spot Area [px²]- Sum par noyau - Mean per Well	Nuclei - Spot Area [px²]- Sum par noyau - StdDev per Well	Number of Analyzed Fields
5	1	E1	69	6.65217	6.30085	1149.04	241.739	228.142	6
6	1	F1	58	10.3793	8.91249	1144.44	370.828	315.078	6
7	1	G1	84	11.119	7.90212	1118.18	400.024	281.194	6
8	1	H1	85	7.4	7.36982	1133.42	267	264.224	6
5	2	E2	91	14.3297	7.45215	1051.19	515.648	264.101	6
6	2	F2	81	13.0741	8.1789	1188.38	471.926	291.461	6
7	2	G2	74	13.3108	7.96899	1112.69	477.149	284.275	6
8	2	H2	62	10.9032	8.34641	1256.75	392.597	299.169	6
5	3	E3	100	13.94	7.28055	1071.14	501.37	258.155	6
6	3	F3	104	11.1923	9.43869	1100.45	404.01	330.866	6
7	3	G3	75	13.6533	7.61665	1146.41	492.48	271.758	6
8	3	H3	63	10.9841	7.36708	1406.63	395.73	263.001	6
5	4	E4	102	13.4804	7.8787	1055.26	484.51	282.135	6
6	4	F4	107	14.1589	5.88915	1457.8	510.037	209.551	6
7	4	G4	83	10.759	6.68378	1240.79	388.639	239.713	6
8	4	H4	68	9.76471	7.27317	1196.32	352.618	259.251	6
5	5	E5	90	10.8444	6.13135	1138.1	390.611	220.053	6
6	5	F5	101	13.3267	6.14021	1420.28	477.752	216.73	6
7	5	G5	100	10.57	6.39327	1366.83	382.54	228.842	6
8	5	H5	71	9.78873	6.61582	1470.23	352.014	236.482	6
5	6	E6	92	4.53261	2.93314	2118.4	164.5	105.686	6
6	6	F6	80	4.7375	3.41532	1714.65	170.15	119.844	6
7	6	G6	81	4.60494	3.06871	1927.85	166.778	111.195	6
8	6	H6	69	3.15942	2.85236	2156.66	114.478	101.673	6
5	7	E7	104	3.43269	3.9653	2122.12	122.077	133.477	6
6	7	F7	84	3.7619	4.08529	1763.75	132.202	136.079	6
7	7	G7	65	2.84615	3.58046	1885.17	100.169	117.24	6
8	7	H7	78	2.19231	2.3962	2120.9	78.4487	83.8511	6
5	8	E8	99	1.9596	2.16616	2084.18	70.5455	75.9722	6
6	8	F8	87	2.57471	3.74051	1592.5	91.3333	130.279	6
7	8	G8	85	3.32941	4.79431	1681.86	115.271	163.833	6
8	8	H8	88	1.76136	3.24832	2431.52	63.0227	116.048	6
5	9	E9	76	2.02632	3.10257	2111.2	72.3947	107.497	6
6	9	F9	75	1.65333	1.75909	1974.45	59.2667	62.072	6
7	9	G9	112	1.8125	4.10785	1799.43	63.6161	133.41	6
8	9	H9	68	1.25	1.94226	1786.83	44.0735	67.3257	6
5	10	E10	76	2.94737	5.85809	1879.14	101.684	199.329	6
6	10	F10	91	1.65934	2.3815	1465.07	57.7253	78.8055	6
7	10	G10	90	2.02222	4.27161	1210.41	70.0444	140.089	6
8	10	H10	75	1.34667	2.39082	1776.87	46.56	81.4307	6
5	11	E11	90	1.48889	2.79343	1839.57	51.9556	95.0294	6
6	11	F11	78	1.55128	1.90452	1522.59	53.5769	64.4319	6
7	11	G11	70	1.71429	2.56025	1999.45	60.4429	86.8002	6
8	11	H11	86	1.37209	3.50477	1972.36	47.8837	122.302	6
5	12	E12	74	1.08108	1.55939	1791.08	38.6486	55.4351	6
6	12	F12	95	1.22105	2.7061	2316.11	42.7053	93.9177	6
7	12	G12	94	1.19149	2.57897	2282.54	41.6064	88.2539	6
8	12	H12	84	0.654762	1.25625	2275.87	22.5714	41.8144	6

## Sheet: Feuil8
Result Info
Summary
3
4
5
6
7
8
9
10
20160314_53BP1_MT-0223_2016.03.14.19.48.22 > 20150519 MTomezak XRCC1 (2016-04-05 16:05:00)
12
13
Download
Row	Col	WellName	Nuclei - Number of Objects	Nuclei - Number of Spots Selected- par noyau - Mean per Well	Nuclei - Number of Spots Selected- par noyau - StdDev per Well	Nuclei - Spot Background Intensity- Mean par noyau - Mean per Well	Nuclei - Spot Area [px²]- Sum par noyau - Mean per Well	Nuclei - Spot Area [px²]- Sum par noyau - StdDev per Well	Number of Analyzed Fields
5	1	E1	93	11.9462	7.82049	1584.73	431.237	278.946	6
6	1	F1	87	10.4253	8.06461	1509.28	376.506	287.427	6
7	1	G1	65	9.32308	7.89206	1367.51	336.092	279.006	6
8	1	H1	64	8.28125	7.22533	1589.67	298.469	257.504	6
5	2	E2	88	14.4886	7.43863	1586.02	523.261	267.926	6
6	2	F2	86	13.7093	7.96295	1262.59	492.942	280.927	6
7	2	G2	84	14.5357	6.26416	1437.66	520.857	221.852	6
8	2	H2	67	12.7015	6.74877	1476.1	457.09	241.555	6
5	3	E3	76	12.5132	6.54114	1702.97	451.079	232.7	6
6	3	F3	77	10.4675	6.82986	1425.13	378.597	240.543	6
7	3	G3	88	13.4886	7.59158	1530.89	485.432	270.654	6
8	3	H3	58	10.2414	9.04823	1709.33	370.121	325.633	6
5	4	E4	72	14.4028	5.94496	1682.17	517.75	212.82	6
6	4	F4	86	14.2674	7.31063	1356.87	508.733	254.297	6
7	4	G4	93	12.172	5.98117	1454.54	440.226	213.317	6
8	4	H4	66	13.6515	7.3033	1795.27	489.061	259.324	6
5	5	E5	109	10.5872	6.80034	1719.11	381.606	240.945	6
6	5	F5	87	9.29885	8.84112	1960.59	333.057	308.249	6
7	5	G5	72	8.80556	5.02007	1734.64	319.792	181.761	6
8	5	H5	58	10.4138	5.56945	2062.19	375.293	199.357	6
5	6	E6	91	5.95604	5.54359	2520.59	211.56	190.36	6
6	6	F6	78	5.03846	6.19896	2646.31	179.077	213.684	6
7	6	G6	90	4.75556	5.92711	2625.25	169.911	201.83	6
8	6	H6	71	2.83099	2.66182	3930.05	103.042	95.6839	6
5	7	E7	110	4.00909	5.94392	2874.7	141.336	202.381	6
6	7	F7	107	3.16822	3.778	2693.96	112.776	129.007	6
7	7	G7	69	3.92754	3.72716	2418.8	138.957	125.868	6
8	7	H7	91	2.68132	2.99213	3323.73	94.1978	99.036	6
5	8	E8	85	1.94118	2.91283	2552.96	69.6471	100.255	6
6	8	F8	87	3.83908	6.52878	2364.89	134.862	227.121	6
7	8	G8	98	2.04082	2.82448	3048.46	73.0204	99.1119	6
8	8	H8	59	2.71186	4.27523	2396.51	93.661	146.267	6
5	9	E9	93	1.77419	2.6298	1879.9	61.5699	88.2231	6
6	9	F9	97	1.6701	2.8274	2710.36	59.0928	95.7847	6
7	9	G9	70	2.97143	11.1719	1777.63	105.6	391.253	6
8	9	H9	65	1.55385	3.29787	2232.59	55.0769	116.245	6
5	10	E10	74	1.56757	2.7849	2912.88	54.7973	88.6577	6
6	10	F10	91	1.57143	2.66726	2342.88	54.7912	88.9164	6
7	10	G10	79	1.05063	1.7313	2548.98	37.1772	60.0533	6
8	10	H10	82	1.26829	1.76418	3128.52	45.6951	63.4147	6
5	11	E11	72	0.944444	1.99922	2522.33	32.9722	67.2873	6
6	11	F11	86	1.11628	1.97287	2622.5	39.3721	64.6951	6
7	11	G11	92	1.17391	1.33102	3372.27	42.1087	46.9488	6
8	11	H11	88	1.02273	1.76803	1964.88	36.1477	61.971	6
5	12	E12	102	1.0098	2.14566	3522.15	36.6569	77.4763	6
6	12	F12	44	1.06818	1.71719	2689.09	38.0682	60.1326	6
7	12	G12	61	1.32787	2.03896	3324.95	46.2131	68.1327	6
8	12	H12	65	0.969231	2.05373	1905.17	33.3846	68.5679	6

## Sheet: Feuil9
Result Info
Summary
3
4
5
6
7
8
9
10
11
20160314_53BP1_MT-0224_2016.03.14.16.21.00 > 20150519 MTomezak XRCC1 (2016-04-05 16:07:08)
13
Download
Row	Col	WellName	Nuclei - Number of Objects	Nuclei - Number of Spots Selected- par noyau - Mean per Well	Nuclei - Number of Spots Selected- par noyau - StdDev per Well	Nuclei - Spot Background Intensity- Mean par noyau - Mean per Well	Nuclei - Spot Area [px²]- Sum par noyau - Mean per Well	Nuclei - Spot Area [px²]- Sum par noyau - StdDev per Well	Number of Analyzed Fields
5	1	E1	81	0.987654	2.48744	1160.62	33.679	83.4174	6
6	1	F1	56	0.964286	3.36271	1512.22	32.4464	109.408	6
7	1	G1	82	1.18293	2.62056	802.911	39.5854	86.7575	6
8	1	H1	77	0.506494	1.25261	1276.53	17.5325	42.3974	6
5	2	E2	78	1.29487	3.52398	1176.77	41.9359	110.829	6
6	2	F2	82	0.670732	1.85961	1887.74	23.1341	61.191	6
7	2	G2	64	0.5	0.92582	1210.02	17.5156	32.001	6
8	2	H2	73	0.753425	2.31409	1136.91	25.8082	80.3187	6
5	3	E3	97	2.05155	4.22387	944.711	68.0825	138.132	6
6	3	F3	106	0.896226	1.99011	1158.18	31.1038	67.8904	6
7	3	G3	86	1.23256	3.58977	757.34	42.0233	121.518	6
8	3	H3	73	0.410959	1.14061	760.875	14.6438	41.2739	6
5	4	E4	89	0.921348	2.28744	1592.83	31.1236	75.4001	6
6	4	F4	94	1.31915	2.77164	1581.84	45.8298	95.6262	6
7	4	G4	68	1.82353	4.34326	1114.49	61.0147	141.07	6
8	4	H4	64	1.84375	4.19455	918.465	62.7969	140.633	6
5	5	E5	78	1.92308	4.34777	1139.88	65.1538	143.24	6
6	5	F5	89	1.67416	4.95611	1869.45	55.8989	163.229	6
7	5	G5	79	1.70886	5.76717	1022.06	58.0759	201.513	6
8	5	H5	80	1.15	2.8244	1281.55	38.7875	93.2269	6
5	6	E6	73	1.46575	2.52808	1746.6	50.9315	85.8682	6
6	6	F6	80	1.15	3.16268	1464.97	39.875	109.01	6
7	6	G6	84	0.821429	1.8638	1286.23	27.8214	62.2957	6
8	6	H6	75	1.76	6.71392	2113.28	61.0533	231.522	6
5	7	E7	67	1.77612	5.14287	1515.79	61.597	181.258	6
6	7	F7	68	1.32353	3.02448	2340.83	45.7059	102.357	6
7	7	G7	72	1.13889	2.49679	1681.4	38.8056	82.372	6
8	7	H7	67	0.865672	1.82487	2027.73	30.3582	62.1783	6
5	8	E8	89	1	2.86039	2227.21	34.2135	96.6723	6
6	8	F8	82	2.10976	5.08449	1512.85	71.5122	171.309	6
7	8	G8	80	1.2	2.74853	1786.06	41.4625	92.3546	6
8	8	H8	79	0.924051	2.87238	716.596	31.1646	93.3809	6
5	9	E9	70	0.928571	1.97316	1967.96	32.5	68.3191	6
6	9	F9	67	1.68657	2.95527	2038.3	57.1493	99.8794	6
7	9	G9	62	1.3871	3.28112	1095.23	45.5484	104.064	6
8	9	H9	70	0.785714	2.15281	1981.32	27.4857	73.4349	6
5	10	E10	76	1.59211	4.19898	1496.15	53.2368	137.929	6
6	10	F10	90	1.4	2.35978	1321.86	48.4111	79.4467	6
7	10	G10	74	0.554054	1.27292	2253	19.7703	44.5905	6
8	10	H10	61	0.704918	2.66673	1266.22	24	90.5769	6
5	11	E11	85	0.423529	0.836325	2353.75	14.8706	28.2303	6
6	11	F11	64	0.484375	1.00778	1476.71	17.0625	35.3943	6
7	11	G11	64	1	2.32993	1663.05	35	82.5364	6
8	11	H11	65	0.615385	1.74725	833.98	20.8	58.4907	6
5	12	E12	66	0.651515	2.20135	2253.84	22.7121	75.9003	6
6	12	F12	61	0.622951	1.18552	2011.97	21.1803	40.6782	6
7	12	G12	80	0.475	1.12481	1498.59	16.3875	38.2147	6
8	12	H12	84	0.642857	1.6693	1463.65	22.3214	58.0214	6

## Sheet: Feuil10
Result Info
Summary
3
4
5
6
7
8
9
10
11
12
20160314_53BP1_MT-0225_2016.03.14.16.46.55 > 20150519 MTomezak XRCC1 (2016-04-05 13:47:26)
Download
Row	Col	WellName	Nuclei - Number of Objects	Nuclei - Number of Spots Selected- par noyau - Mean per Well	Nuclei - Number of Spots Selected- par noyau - StdDev per Well	Nuclei - Spot Background Intensity- Mean par noyau - Mean per Well	Nuclei - Spot Area [px²]- Sum par noyau - Mean per Well	Nuclei - Spot Area [px²]- Sum par noyau - StdDev per Well	Number of Analyzed Fields
5	1	E1	128	0.375	1.05741	678.075	12.8828	36.1078	6
6	1	F1	94	0.617021	2.41013	1346.86	21.617	86.1156	6
7	1	G1	95	0.473684	1.57671	1137.05	16.2842	53.7786	6
8	1	H1	71	0.028169	0.166633	135.25	1.01408	5.99879	6
5	2	E2	147	0.62585	1.60569	1424.16	21.1088	52.6667	6
6	2	F2	159	0.345912	0.841844	1753.53	12.0629	28.7113	6
7	2	G2	150	0.746667	1.2911	1399.17	26.0533	44.3329	6
8	2	H2	135	0.362963	0.943219	1580.73	12.5037	31.9454	6
5	3	E3	154	0.954545	4.26314	1908.48	33.6039	146.398	6
6	3	F3	143	0.762238	1.35292	1830.52	26.3007	46.6416	6
7	3	G3	167	0.724551	1.40851	1668.82	25.018	45.3073	6
8	3	H3	138	0.398551	0.955505	1947.52	13.9348	32.7421	6
5	4	E4	127	0.976378	3.18096	2798.62	34.811	112.897	6
6	4	F4	142	1.27465	6.45678	1472.83	43.7113	220.42	6
7	4	G4	138	0.644928	1.24279	1447.46	22.9928	44.6075	6
8	4	H4	157	0.675159	1.96839	1118.92	23.6624	70.6809	6
5	5	E5	104	0.519231	1.00466	2849.86	18.9904	36.9593	6
6	5	F5	127	0.393701	0.757581	3118.5	14.3937	27.7938	6
7	5	G5	111	0.720721	1.2733	2067.78	25.2613	44.4305	6
8	5	H5	125	0.512	1.60451	2593.88	18.4	56.5626	6
5	6	E6	71	4.60563	25.3909	2784.76	152.028	826.36	6
6	6	F6	106	0.792453	2.917	2978.42	28.8962	106.282	6
7	6	G6	95	0.473684	0.848555	1947.75	16.5474	28.9213	6
8	6	H6	93	0.462366	1.06892	1667.14	16.3118	37.3962	6
5	7	E7	108	0.518519	0.942074	2542.69	18.3796	33.3115	6
6	7	F7	87	0.735632	0.945734	2389.22	26.3563	34.0936	6
7	7	G7	98	1.31633	4.28278	2562.79	46.602	149.786	6
8	7	H7	113	0.415929	0.852786	2085.71	14.9027	30.9882	6
5	8	E8	118	0.881356	2.53242	2648.09	31.4237	91.2957	6
6	8	F8	122	0.696721	1.69535	1677.37	24.5984	61.0485	6
7	8	G8	139	0.676259	0.910612	1889.11	23.7986	32.0968	6
8	8	H8	139	0.330935	0.705963	1639.77	11.9281	25.4577	6
5	9	E9	129	0.51938	1.44212	2679.11	18.7287	53.02	6
6	9	F9	163	1.6135	5.12477	1392.94	56.7362	182.591	6
7	9	G9	148	0.722973	1.41816	1516.37	24.9865	47.807	6
8	9	H9	166	0.596386	1.66598	756.749	20.4157	57.0989	6
5	10	E10	146	0.589041	1.70868	2131.5	21.089	62.1855	6
6	10	F10	142	0.584507	0.969338	2194.47	21	34.8478	6
7	10	G10	161	0.645963	1.12032	1260.6	22.0311	38.0034	6
8	10	H10	133	0.548872	1.20269	1207.21	19.203	41.5708	6
5	11	E11	139	1.28058	4.19287	1798.07	44.3669	147.07	6
6	11	F11	145	0.648276	1.26673	1572.19	22.7241	44.9649	6
7	11	G11	155	0.890323	1.86759	1649.1	30.5871	64.4597	6
8	11	H11	109	0.706422	2.65031	820.467	24.7248	95.0026	6
5	12	E12	163	0.368098	0.915956	1555.54	12.9264	32.0702	6
6	12	F12	137	0.518248	0.908313	1564.49	18.1095	31.232	6
7	12	G12	154	0.487013	1.16168	1783.71	16.9351	39.8232	6
8	12	H12	149	0.711409	1.50358	1038.89	24.302	51.1136	6

[truncated: 1 more sheets: Feuil12]
