# Supplementary material for: The out-of-field dose in radiation therapy induces delayed tumorigenesis by senescence evasion
Source: eLife. 2022 Mar 18;11:e67190. doi: 10.7554/eLife.67190 (PMC8933005; doi:10.7554/eLife.67190)
Supplement: Figure 5—figure supplement 3—source data 1. [file elife-67190-fig5-figsupp3-data1.xlsx]

## Sheet: Feuil1
Figure 5-Figure supplement 3-source data 1
PAR		Non-irradiated	1x2Gy	10x2Gy	1x2GY	10x2Gy	1x2Gy	10x2Gy
		0.633628	16.7068	0.340188	16.0631	0	17.5789	0.416296
		1.58967	17.1095	2.19875	17.5605	0	26.5135	1.39851
		1.81188	43.9484	4.49287	22.8269	2.45114	28.2492	2.02569
		2.18165	45.8378	6.35224	25.8243	5.11315	30.5712	2.07596
		2.41314	51.1195	6.6596	29.1335	5.59937	36.1893	2.08185
		2.47712	52.9835	7.39709	31.6679	6.27125	39.7912	2.36527
		3.12563	55.9954	9.84635	34.197	6.39845	39.8629	2.37302
		4.28266	57.8474	11.3369	34.6474	7.30188	42.712	2.47074
		4.82114	58.6627	12.5274	35.9115	7.6649	43.4614	2.51942
		5.35559	61.4085	16.9832	42.3688	8.0649	43.6063	3.00287
		5.45857	65.3401	18.915	45.1186	8.5273	47.1144	3.57642
		6.08761	76.2041	19.1731	45.1436	9.1093	50.012	3.57712
		6.1763	76.6574	20.2155	45.4047	10.0927	57.5265	3.92378
		6.74663	78.7954	21.1125	47.148	10.2465	58.3629	3.95839
		6.8876	79.2088	21.3814	47.9256	10.6784	59.0964	4.43187
		7.16567	80.6967	23.5096	48.2257	11.3534	59.2697	4.58566
		7.38924	83.7582	23.7353	49.3837	12.124	61.2827	4.75366
		8.05928	84.0973	23.9674	50.5779	12.356	63.0928	4.94846
		9.01586	85.4541	24.1907	51.4926	12.8662	65.4051	5.07826
		9.93324	86.2543	25.6649	55.4081	12.9946	65.6576	5.23081
		10.6909	86.493	25.9816	55.9441	13.227	65.7543	5.52977
		11.5844	90.5697	26.016	56.4265	13.3173	66.0109	5.54504
		11.5844	92.0368	26.3122	57.3834	14.1394	68.0273	5.56623
		12.6473	97.8614	26.8188	58.6757	15.8721	69.879	5.59737
		14.8497	98.0513	27.3067	58.7611	16.2109	69.882	5.61309
		15.54	102.104	27.8583	60.5827	16.6325	70.6278	5.96696
		16.0985	102.292	28.0385	61.6939	18.1455	72.871	6.11613
		16.7222	103.812	28.7294	61.9391	18.3276	74.1515	6.28736
		16.8986	104.049	28.7524	63.2234	19.4815	77.641	6.38372
		18.3314	111.29	29.5995	63.2443	20.4491	78.9667	6.75278
		18.4354	112.75	29.7402	64.0316	21.5477	79.6309	6.95245
		18.4947	117.596	29.7885	65.8568	22.9197	81.4111	7.38893
		19.1785	203.79	31.9245	68.4316	23.7107	82.1433	7.73181
		19.3113		32.2587	68.9693	23.9667	82.7878	7.81113
		20.0362		33.5626	69.2709	24.4164	83.6795	8.61171
		21.483		33.7005	69.9377	24.9525	83.8405	8.62539
		21.5468		35.1253	70.4118	25.4194	84.3414	9.00639
		23.2505		35.4338	71.2241	27.5446	86.169	9.26702
		23.2857		35.9067	71.5781	27.9737	87.739	9.45987
		23.4387		35.9604	71.6227	29.8779	88.1679	9.92342
		23.5793		36.8043	72.1367	31.1115	88.8541	10.0974
		23.5877		37.0084	73.8555	32.0665	89.0851	10.2399
		25.0058		37.1485	78.8281	32.1389	90.9429	10.2408
		25.3435		37.2766	79.064	32.2146	96.3601	10.2735
		25.7404		38.1639	81.1852	33.8386	96.7486	10.3492
		26.9547		38.6496	83.4179	35.144	99.0813	11.2328
		28.901		40.587	91.4411	37.1737	101.434	11.2546
		29.4224		41.176	91.6802	37.431	102.164	11.3824
		29.9789		46.5874	91.7657	38.5555	106.07	11.4747
		31.6464		46.8734	104.576	39.0752	106.678	11.5117
		31.6746		47.0919	105.338	45.0891	107.638	11.5344
		32.0651		53.2801	105.75	46.533	108.795	12.1265
		33.0831		58.2298	107.864	47.1815	110.179	12.1959
		33.7865		58.8249	117.411	48.234	110.217	12.8862
		34.5631				48.572	113.204	13.0677
		35.4314				50.752	114.068	13.3509
		36.4278				55.3595	114.311	13.3999
		36.9072					115.18	13.6762
		37.4818					115.769	13.6854
		37.4818					117.696	14.3092
		37.524					118.559	14.4602
		39.2567					118.766	14.7003
		44.2979					121.333	15.3065
		47.0961					122.99	15.994
							124.535	16.1401
							125.217	16.1735
							127.736	16.2919
							127.861	17.1206
							129.123	17.2316
							130.204	17.3464
							131.272	18.095
							131.734	18.5638
							134.645	18.7971
							149.102	18.9352
							151.782	20.3205
							156.143	20.3731
							163.86	20.3822
								22.0904
								22.1188
								22.4429
								22.6951
								23.6012
								26.1934
								26.3129
								27.566
								28.8149
								30.6077
								31.2823
								31.6756
								36.034
								37.1628
								40.2996
								44.1609
