# Supplementary material for: The out-of-field dose in radiation therapy induces delayed tumorigenesis by senescence evasion
Source: eLife. 2022 Mar 18;11:e67190. doi: 10.7554/eLife.67190 (PMC8933005; doi:10.7554/eLife.67190)
Supplement: Figure 5—source data 1. [file elife-67190-fig5-data1.xlsx]

## Sheet: Feuil1
Figure 5-source data 1
bilan dna damge accumulation ph8 PTV
ctrl ni	1x2 gy	5x2gy
0	0	0
0	0	0		14.3023	22.6142	16.5317
0	0	0
0	0	0
0	0	0
0	0	0
0	0	0
0	0	0
0	0	0
0	0	0
0	0	0
0	0	0
0	0	0
0	0	0
0	0	0
0	0	0
0	0	0
0	0	0
0	0	0
0	0	0
0	0	0
0	0	0
0	0	0
0	0	0
0	0	0
0	0	0
0	0	0
0	0	0
0	0	0
0	0	0
0	0	0
0	0	0
0	0	0
0	0	0
0	0	0
0	0	0
0	0	0
0	0	0
0	0	0
0	0	0
0	0	0
0	0	0
0	0	0
0	0	0
0	0	0
0	0	0
0	0	0
0	0	0
0	0	0
0	0	0
0	0	0
0	0	0
0	0	0
0	0	0
0	0	0
0	0	0
0	0	0
0	0	0
0	0	0
0	0	0
0	0	0
0	0	0
0	0	0
0	0	0
0	0	0
0	0	0
0	0	0
0	0	0
0	0	0
0	0	0
0	0	0
0	0	0
0	0	0
0	0	0
0	0	0
0	0	0
0	0	0
0	0	0
0	0	0
0	0	0
0	0	0
0	0	0
0	0	0
0	0	0
0	0	0
0	0	0
0	0	0
0	0	0
0	0	0
0	0	0
0	0	0
0	0	0
0	0	0
0	0	0
0	0	0
0	0	0
0	0	0
0	0	0
0	0	0
0	0	0
0	0	0
0	0	0
0	0	0
0	0	0
0	0	0
0	0	0
0	0	0
0	20.8632	0
0	24.9688	0
0	30.0685	0
0	31.7752	0
0	32.9552	0
0	33.0076	0
0	37.048	0
0	37.3655	0
0	37.4861	0
0	37.6747	0
0	38.1331	0
0	39.017	0
0	39.4455	14.7035
0	41.6039	14.7036
0	42.3264	15.2372
0	42.832	15.5601
0	43.1578	17.3437
0	44.1943	17.3952
0	44.4933	17.4196
0	44.9381	17.8365
0	45.1783	18.2741
0	45.1841	18.502
0	45.4866	21.1001
0	45.5812	21.3031
0	46.7786	21.5245
0	48.7919	22.1158
0	48.9158	22.5632
0	49.066	23.0515
0	49.1669	24.015
0	49.2494	24.3716
0	49.6458	24.6828
0	50.0899	25.0502
0	50.4716	25.0579
0	50.5476	25.3524
0	51.4162	25.4441
0	51.6742	25.6965
0	51.8033	26.0141
0	52.0508	26.6848
0	52.4495	26.8795
0	53.0211	27.3212
0	54.3517	27.4693
0	54.3993	27.5104
0	55.7237	28.2047
0	56.1555	28.5885
0	57.3642	28.817
0	59.207	28.9704
0	59.3322	29.0008
0	59.7459	29.5317
0	59.9102	30.3753
39.3512	61.3191	30.4859
40.8289	61.4586	31.1528
52.4107	62.0257	31.9811
53.5043	62.485	32.0843
56.0701	64.0277	32.665
57.4875	64.94	34.1079
59.5295	66.8751	34.1149
63.7138	67.8014	34.9991
64.1977	69.0066	35.108
64.272	70.7896	35.6338
66.1002	71.0538	36.1167
66.2605	75.0254	37.2677
67.3513	76.2383	41.6352
68.4508	77.0681	41.7313
68.5084	81.558	42.6839
70.6292	87.5228	43.5373
70.8271	89.2138	45.0798
72.143	89.4197	45.6804
72.4181	98.016	45.7568
72.8996	98.4916	46.1354
73.5134	100.692	46.1649
80.51	101.568	47.6822
84.4166	105.24	49.9992
85.7557		50.1225
86.6911		53.2644
91.0821		55.1016
92.6104		56.3367
95.0334		61.5014
98.3899		67.2009
100.388		68.763
107.723		73.2531
110.929		84.4213
112.499		86.4672
118.466		86.6067
146.775		88.9634
		92.293
		94.6515
		104.954
		113.408
		121.989
		131.973
