# Supplementary material for: The out-of-field dose in radiation therapy induces delayed tumorigenesis by senescence evasion
Source: eLife. 2022 Mar 18;11:e67190. doi: 10.7554/eLife.67190 (PMC8933005; doi:10.7554/eLife.67190)
Supplement: Figure 5—source data 4. [file elife-67190-fig5-data4.xlsx]

## Sheet: Feuil1
dna damage accumulation ph8 margin -5 to 20mm
ctrl NI	1x2Gy	5x2Gy
0	0	0
0	0	0			4.91163	3.95507	4.85749
0	0	0					0.000528387
0	0	0
0	0	0
0	0	0
0	0	0
0	0	0
0	0	0
0	0	0
0	0	0
0	0	0
0	0	0
0	0	0
0	0	0
0	0	0
0	0	0
0	0	0
0	0	0
0	0	0
0	0	0
0	0	0
0	0	0
0	0	0
0	0	0
0	0	0
0	0	0
0	0	0
0	0	0
0	0	0
0	0	0
0	0	0
0	0	0
0	0	0
0	0	0
0	0	0
0	0	0
0	0	0
0	0	0
0	0	0
0	0	0
0	0	0
0	0	0
0	0	0
0	0	0
0	0	0
0	0	0
0	0	0
0	0	0
0	0	0
0	0	0
0	0	0
0	0	0
0	0	0
0	0	0
0	0	0
0	0	0
0	0	0
0	0	0
0	0	0
0	0	0
0	0	0
0	0	0
0	0	0
0	0	0
0	0	0
0	0	0
0	0	0
0	0	0
0	0	0
0	0	0
0	0	0
0	0	0
0	0	0
0	0	0
0	0	0
0	0	0
0	0	0
0	0	0
0	0	0
0	0	0
0	0	0
0	0	0
0	0	0
0	0	0
0	0	0
0	0	0
0	0	0
0	0	0
0	0	0
0	0	0
0	0	0
0	0	0
0	0	0
0	0	0
0	0	0
0	0	0
0	0	0
0	0	0
0	0	0
0	0	0
0	0	0
0	0	0
0	0	0
0	0	0
0	0	0
0	0	0
0	0	0
0	0	0
0	0	0
0	0	0
0	0	0
0	0	0
0	0	0
0	0	0
0	0	0
0	0	0
0	0	0
0	0	0
0	0	0
0	0	0
0	0	0
0	0	0
0	0	0
0	0	0
0	0	0
0	0	0
0	0	0
0	0	0
0	0	0
0	0	0
0	0	0
0	0	0
0	0	0
0	0	0
0	0	0
0	0	0
0	0	0
0	0	0
0	0	0
0	0	0
0	0	0
0	0	0
0	0	0
0	0	0
0	0	0
0	0	0
0	0	0
0	0	0
0	0	0
0	0	0
0	0	0
0	0	0
0	0	0
0	0	31.7739
0	0	37.606
0	0	38.9614
0	0	47.9114
0	0	48.8656
0	0	49.2278
0	0	52.8945
0	0	54.1758
0	0	55.5641
0	0	66.3091
0	0	78.3622
0	0	99.7512
0	0	149.798
0	0
0	0
0	0
0	0
0	0
0	0
0	0
0	0
0	0
0	0
0	0
0	0
0	0
0	0
0	0
0	0
0	0
0	0
0	0
0	0
0	0
0	0
0	0
0	0
0	0
0	0
0	0
0	0
0	0
0	0
0	0
0	0
0	0
0	0
0	0
0	0
0	0
0	0
0	0
0	0
0	0
0	0
0	0
0	0
0	0
0	0
0	0
0	0
0	0
0	0
0	0
0	0
0	0
0	0
0	0
0	0
0	0
0	0
0	0
0	0
0	18.1102
0	18.5945
0	19.9513
0	20.6571
0	23.9916
0	24.0513
0	24.3486
0	25.2806
0	26.3477
0	28.1898
0	31.5171
0	32.8286
0	33.7811
0	34.3067
0	36.4656
0	36.6251
0	37.5427
0	38.6
0	39.3309
0	39.4366
0	40.1876
0	44.0428
0	47.1512
0	47.2316
0	50.6256
0	60.3459
0	61.0908
0	67.9091
0
0
0
0
0
0
0
0
0
0
0
0
0
0
0
0
0
0
22.7174
26.8678
27.123
27.8639
29.2246
30.9671
32.891
35.0256
36.483
39.1038
40.8165
42.1968
47.1851
48.4387
48.9807
49.1124
51.8101
53.176
57.0001
57.7141
60.4561
72.2169
75.4808
88.6086
102.13
117.267
152.63
