# Supplementary material for: The out-of-field dose in radiation therapy induces delayed tumorigenesis by senescence evasion
Source: eLife. 2022 Mar 18;11:e67190. doi: 10.7554/eLife.67190 (PMC8933005; doi:10.7554/eLife.67190)
Supplement: Figure 5—source data 5. [file elife-67190-fig5-data5.xlsx]

## Sheet: Feuil1
Figure 5-source data 5
bilan dna damage accumulation ph8 margin +22 to 47mm
ctrl NI	1x2 Gy	5x2 Gy
0	0	0
0	0	0		19.5238	20.5339	19.7919
0	0	0
0	0	0
0	0	0
0	0	0
0	0	0
0	0	0
0	0	0
0	0	0
0	0	0
0	0	0
0	0	0
0	0	0
0	0	0
0	0	0
0	0	0
0	0	0
0	0	0
0	0	0
0	0	0
0	0	0
0	0	0
0	0	0
0	0	0
0	0	0
0	0	0
0	0	0
0	0	0
0	0	0
0	0	0
0	0	0
0	0	0
0	0	0
0	0	0
0	0	0
0	0	0
0	0	0
0	0	0
0	0	0
0	0	0
0	0	0
0	0	0
0	0	0
0	0	0
0	0	0
0	0	0
0	0	0
0	0	0
0	0	0
0	0	0
0	0	0
0	0	0
0	0	0
0	0	0
0	0	0
0	0	0
0	0	0
0	0	0
0	0	0
0	0	0
0	0	0
0	0	0
0	0	0
0	0	0
0	0	0
0	0	0
0	0	0
0	0	0
0	0	0
0	0	0
0	0	0
0	0	0
0	0	0
0	0	0
0	0	0
0	0	0
0	0	0
0	0	0
0	0	0
0	0	0
0	0	0
0	0	0
0	0	0
0	0	0
0	0	0
0	0	0
0	0	0
0	0	0
0	0	0
0	0	0
0	0	0
0	0	0
0	0	0
0	0	0
0	0	0
0	0	0
0	0	0
0	0	0
0	0	0
0	0	0
0	0	0
0	0	0
0	0	0
0	0	0
0	0	0
0	0	0
0	0	0
0	0	0
0	0	0
0	0	0
0	0	0
0	0	0
0	0	0
0	0	0
0	0	0
0	0	0
0	0	0
0	0	0
0	0	0
0	0	0
0	0	0
0	0	0
0	0	0
0	0	0
0	0	0
0	0	0
0	0	0
0	0	0
0	0	0
0	0	0
0	0	0
0	0	0
0	0	0
0	0	0
0	0	0
0	0	0
0	0	0
0	0	0
0	0	0
0	0	0
0	0	0
0	0	0
0	0	0
0	0	0
0	0	0
0	0	0
0	0	0
0	0	0
0	0	0
0	0	0
0	0	0
0	0	0
0	0	0
0	0	0
0	0	0
0	0	0
0	0	0
0	0	0
0	0	0
0	0	0
0	0	0
0	0	0
0	0	0
0	0	0
0	0	0
0	0	0
0	0	0
0	18.5578	0
0	25.2199	0
0	25.5416	0
0	36.3813	0
0	36.5783	0
0	37.8481	0
0	38.2078	0
0	39.1124	0
0	39.1623	0
0	39.4775	0
27.1948	40.0085	0
33.2213	40.7893	0
36.8516	41.9686	0
37.8357	42.5907	0
38.4444	43.753	0
40.0931	45.0961	0
41.008	45.9493	0
43.8288	45.9845	0
47.0291	46.2036	0
47.1648	46.7076	0
48.7697	48.0987	27.7925
49.4381	48.5584	32.4716
51.148	49.8835	36.3253
51.3729	51.4016	40.6843
52.765	52.4128	42.2943
52.8898	52.6127	44.2849
52.9124	53.3586	45.5474
54.3938	53.6836	49.9715
54.7542	54.5028	49.9824
55.6959	54.683	50.1933
57.0666	56.1752	52.5785
61.1708	56.9217	54.217
62.1759	60.1314	54.3242
62.867	60.6771	55.23
68.3694	62.2819	58.5871
68.4478	62.8891	62.6446
68.9203	63.5257	66.7061
69.3079	63.8037	68.349
69.5444	65.2879	69.2851
72.2521	66.5146	69.4775
72.8489	66.5452	70.968
75.8069	66.7496	73.9795
78.7	67.5643	75.521
78.8008	68.4978	76.2826
83.941	68.931	77.1572
84.2948	71.5851	78.7059
85.8237	73.1928	79.1869
87.1608	73.1981	79.2523
87.8802	75.5621	79.4871
90.2369	76.1475	79.9466
96.3555	76.5207	80.1502
100.367	76.9733	82.0184
101.09	77.6932	82.1104
102.251	79.7345	83.0743
105.932	80.0074	83.8311
109.962	83.1889	86.5845
120.571	83.5372	87.8716
133.324	85.695	94.1556
154.632	91.5909	94.421
157.848	92.9088	96.8835
157.93	96.8091	97.4618
169.201	98.6612	98.0581
171.404	99.4352	99.617
446.232	123.029	101.281
	130.283	102.652
	138.744	105.412
	139.134	108.334
	143.942	108.393
	145.775	110.77
	148.087	110.87
	195.346	111.913
		111.97
		113.577
		120.358
		122.011
		125.434
		143.344
		145.174
		179.445
