# Supplementary material for: The out-of-field dose in radiation therapy induces delayed tumorigenesis by senescence evasion
Source: eLife. 2022 Mar 18;11:e67190. doi: 10.7554/eLife.67190 (PMC8933005; doi:10.7554/eLife.67190)
Supplement: Figure 5—source data 6. [file elife-67190-fig5-data6.xlsx]

## Sheet: Feuil1
Figure 5-source data 6
bilan dna damage accumulation ph12 PTV
ni ctrl	1x2 GY	5x2Gy
68.1175	72.9173	34.738		138.702	158.182	105.659
69.6133	75.6526	55.4009
70.4905	82.3621	62.4512
74.091	98.3362	65.6154
79.6897	98.5552	73.2798
85.8697	110.03	73.4766
94.7328	111.657	75.2318
101.351	112.73	75.5218
101.52	113.81	75.5772
102.627	114.627	75.7631
105.761	120.27	76.2169
117.255	121.451	79.0366
120.338	127.613	79.8975
121.03	128.85	81.2398
122.313	135.986	84.0976
125.691	137.584	84.5599
130.009	139.12	85.8879
131.218	140.805	87.7591
131.609	143.774	88.8894
135.232	147.436	91.6274
135.889	147.686	92.4485
138.365	149.657	94.3689
141.668	155.887	95.1636
144.422	156.31	95.3735
146.48	157.267	96.7616
148.016	158.345	97.7998
149.384	161.046	98.88
151.839	161.212	99.3471
152.151	167.536	104.053
153.426	180.399	105.915
155.747	184.533	106.255
159.311	185.056	106.876
160.683	191.032	109.447
163.694	207.66	110.248
164.84	213.908	110.667
168.068	216.976	111.433
169.221	221.507	111.637
172.788	223.41	120.397
173.258	228.17	120.498
175.017	234.684	122.27
183.448	249.795	122.717
186.429	251.106	123.796
187.091	265.093	136.195
189.335		144.29
199.493		144.694
221.677		146.539
		154.04
		162.818
		173.501
		173.52
		194.392
		201.663
