# Supplementary material for: The out-of-field dose in radiation therapy induces delayed tumorigenesis by senescence evasion
Source: eLife. 2022 Mar 18;11:e67190. doi: 10.7554/eLife.67190 (PMC8933005; doi:10.7554/eLife.67190)
Supplement: Figure 5—source data 7. [file elife-67190-fig5-data7.xlsx]

## Sheet: Feuil1
Figure 5-source data 7
bilan dna damage accumulation ph12 margin-5 to 20mm
ctrl NI	1x2 Gy	5x2 Gy
64.6257	92.487	110.72
64.692	98.3424	114.652			110.902	148.972	158.392
67.0622	111.648	115.072					6.6979e-15
69.3551	114.462	116.742
74.5153	114.735	117.782
78.5274	115.043	118.612
79.0553	116.02	118.735
81.8084	118.296	122.19
83.1283	120.168	123.068
86.1672	120.205	123.858
86.6608	120.485	125.46
88.6628	124.394	126.298
90.1438	126.571	130.788
90.9628	129.018	131.739
91.1811	132.501	133.692
93.0372	133.021	135.008
96.0964	134.092	135.985
97.6794	135.767	139.59
98.1035	136.566	142.832
98.7933	137.102	143.842
99.8319	138.015	144.065
99.8636	140.952	144.183
100.977	140.981	149.075
101.054	143.573	151.102
101.905	144.866	151.316
101.995	147.213	151.562
102.806	147.486	152.755
107.32	148.515	153.436
109.833	149.329	157.086
111.792	149.751	157.963
112.367	150.901	158.427
114.009	151.873	163.136
114.851	154.437	164.212
115.661	157.733	167.245
118.237	157.952	168.336
118.525	158.57	170.93
120.605	158.9	171.213
120.675	160.15	174.052
122.335	160.776	174.272
122.594	161.377	174.613
124.851	162.938	175.074
126.123	164.744	180.522
126.42	166.527	183.949
130.7	167.648	186.313
134.741	169.628	186.326
136.026	170.585	186.591
143.34	171.972	187.057
144.201	174.622	188.431
144.728	180.055	195.332
145.019	180.531	195.674
145.339	187.8	196.618
147.679	189.927	204.238
154.385	212.856	205.422
159.828	214.621	218.594
171.119	224.737	223.824
178.511		230.368
