# Supplementary material for: The out-of-field dose in radiation therapy induces delayed tumorigenesis by senescence evasion
Source: eLife. 2022 Mar 18;11:e67190. doi: 10.7554/eLife.67190 (PMC8933005; doi:10.7554/eLife.67190)
Supplement: Figure 5—source data 8. [file elife-67190-fig5-data8.xlsx]

## Sheet: Feuil1
Figure 5-source data 8
bilan dna damage accumulation ph12 margin +22 to 47 mm
ni ctrl	1x2gy	5x2gy
58.6507	65.9469	78.7133
61.0703	77.4873	89.6994		116.756	127.998	139.39
61.7554	78.9107	95.0306
68.7001	83.3327	97.4124
74.8925	87.0118	98.6861
75.2085	87.8717	98.751
75.6852	88.3651	100.355
79.9292	90.6225	101.36
81.7655	90.7284	105.015
83.7353	96.0345	107.617
84.5614	97.6691	109.268
86.7325	98.8048	110.02
87.527	102.628	110.295
88.5868	103.843	110.915
91.6982	105.188	111.026
91.7262	106.001	111.266
91.8529	108.152	112.644
93.069	109.548	113.398
93.2618	110.331	113.782
98.5201	111.662	114.958
100.418	111.786	116.734
102.755	112.386	116.772
102.99	112.966	116.87
103.027	113.473	118.057
103.809	114.177	118.141
104.146	115.049	118.655
106.333	115.958	119.342
108.041	117.139	123.482
108.245	117.39	125.828
108.944	118.173	129.2
111.286	118.494	130.649
111.425	119.414	131.765
114.192	120.05	137.209
115.145	120.258	141.139
116.419	123.029	142.792
117.553	125.326	143.253
118.441	127.307	143.393
118.549	128.046	143.695
119.143	133.954	144.607
120.773	138.016	144.896
121.303	139.156	145.943
122.11	139.316	146.495
122.569	139.973	146.889
123.163	140.622	148.538
125.518	140.705	150.367
126.507	141.568	152.683
126.626	146.317	153.295
132.56	146.681	155.419
133.496	147.496	155.592
133.631	147.618	155.661
133.723	148.367	156.038
138.646	148.524	160.123
141.402	150.894	162.116
141.838	151.112	163.875
142.006	151.521	169.032
142.53	153.644	169.818
145.056	155.729	170.05
149.038	155.922	171.49
152.853	155.924	172.803
155.469	156.06	173.011
157.336	157.809	173.191
158.829	158.602	175.487
161.605	165.01	185.017
163.977	165.257	193.117
171.35	172.26	199.07
179.611	183.211	213.381
196.388	219.553	227.255
199.731	222.475	236.107
