# Supplementary material for: The out-of-field dose in radiation therapy induces delayed tumorigenesis by senescence evasion
Source: eLife. 2022 Mar 18;11:e67190. doi: 10.7554/eLife.67190 (PMC8933005; doi:10.7554/eLife.67190)
Supplement: Figure 6—figure supplement 2—source data 1. [file elife-67190-fig6-figsupp2-data1.xlsx]

## Sheet: Feuil1
Figure 6-Figure supplement 2- source data 1
culture cellulaire : Erwan GOY	F1MC
boite routine : 200 000/ WB : 100 000/ IF : 20 000/ SA B GAL: 50 000
DP : (log ( cell collecté /cell étalée)/log2) + ancien DP
date	condition	Nombre de cellules encemmencées	nbr de cellules comptées (* 104)	ancien DP	nvx DP	remarque			congelation
2019-01-21	NI				26.83
2019-01-25	Non-irradiated	900000	1890000	26.83	27.9004	IRRADIATION				2019-01-21	2019-01-25	2019-01-28	2019-01-31	2019-02-05	2019-02-11	2019-03-11	2019-03-18	2019-03-23	2019-03-29	2019-04-02	2019-04-16
	PTV	1800000	880000	26.83	25.7976	IRRADIATION				day
	Margin -5 to +20mm	1800000	1600000	26.83	26.6601	IRRADIATION				0	4	7	10	15	21	51	58	63	69	73	87
	Margin +22 to +47mm	1800000	2120000	26.83	27.0661	IRRADIATION			Non-irradiated	26.83	27.9004	29.0606	29.7586	30.0869	31.0149
2019-01-28	Non-irradiated	1890000	4224000	27.9004	29.0606	IRRADIATION			PTV	26.83	25.7976	25.9004	25.4571	24.567	23.1961
	PTV	880000	945000	25.7976	25.9004	IRRADIATION			Margin -5 to +20mm	26.83	26.6601	27.355	27.4746	27.2865	28.1326	28.4239	30.3499	31.7395	34.3244	34.389	36.5261
	Margin -5 to +20mm	1600000	2590000	26.6601	27.355	IRRADIATION			Margin +22 to +47mm	26.83	27.0661	28.2807	28.8584	28.9347	29.3387	29.1784	29.037	30.1074	31.5928	31.645	33.9713
	Margin +22 to +47mm	2120000	4920000	27.0661	28.2807	IRRADIATION
2019-01-31	Non-irradiated	900000	1460000	29.0606	29.7586	IRRADIATION
	PTV	945000	695000	25.9004	25.4571	IRRADIATION
	Margin -5 to +20mm	2590000	2814000	27.355	27.4746	IRRADIATION
	Margin +22 to +47mm	3000000	4477500	28.2807	28.8584	IRRADIATION
2019-02-05	Non-irradiated	900000	1130000	29.7586	30.0869
	PTV	695000	375000	25.4571	24.567
	Margin -5 to +20mm	2814000	2470000	27.4746	27.2865
	Margin +22 to +47mm	3000000	3163000	28.8584	28.9347
2019-02-11	Non-irradiated	1130000	2150000	30.0869	31.0149
	PTV	375000	145000	24.567	23.1961
	Margin -5 to +20mm	2470000	4440000	27.2865	28.1326
	Margin +22 to +47mm	3163000	4185000	28.9347	29.3387
2019-02-27	PN	2340000	1200000	28.1326	27.1691
	O	504000	500000	29.3387	29.3272
2019-03-11	Non-irradiated	170000	500000	29.2	30.7564	decongelation NI
	PTV			23.1961	#DIV/0!
	Margin -5 to +20mm	1100000	2625000	27.1691	28.4239
	Margin +22 to +47mm	500000	451000	29.3272	29.1784
2019-03-18	Non-irradiated	400000	1280000	30.7564	32.4345
	PTV			#DIV/0!	#DIV/0!
	Margin -5 to +20mm	400000	1520000	28.4239	30.3499
	Margin +22 to +47mm	300000	272000	29.1784	29.037
2019-03-23	Non-irradiated	200000	488000	32.4345	33.7213
	PTV			#DIV/0!	#DIV/0!
	Margin -5 to +20mm	200000	524000	30.3499	31.7395
	Margin +22 to +47mm	200000	420000	29.037	30.1074
2019-03-29	Non-irradiated	200000	960000	33.7213	35.9844
	PTV			#DIV/0!	#DIV/0!
	Margin -5 to +20mm	200000	1200000	31.7395	34.3244
	Margin +22 to +47mm	200000	560000	30.1074	31.5928
2019-04-02	Non-irradiated	100000	300000	35.9844	37.5693
	PTV			#DIV/0!	#DIV/0!
	Margin -5 to +20mm	800000	1320000	34.3244	35.0469
	Margin +22 to +47mm	200000	420000	31.5928	32.6632
2019-04-16	Non-irradiated	300000	1116000	37.5693	39.4646
	PTV			#DIV/0!	#DIV/0!
	Margin -5 to +20mm	1320000	3680000	35.0469	36.5261
	Margin +22 to +47mm	420000	1040000	32.6632	33.9713
