# Supplementary material for: The out-of-field dose in radiation therapy induces delayed tumorigenesis by senescence evasion
Source: eLife. 2022 Mar 18;11:e67190. doi: 10.7554/eLife.67190 (PMC8933005; doi:10.7554/eLife.67190)
Supplement: Figure 6—figure supplement 2—source data 2. [file elife-67190-fig6-figsupp2-data2.xlsx]

## Sheet: % surviving cell
								Figure 6-Figure supplement 2- source data 2
								HPRT F1mc
										Measurement count: 1 Filter: 570
											1	2	3	4	5	6	7	8	9	10	11	12
									BRUT	A	0.048	0.051	0.046	0.423	0.441	0.436	0.411	0.382	0.383	0.548	0.545	0.556
										B	0.497	0.466	0.444	0.396	0.406	0.403	0.355	0.359	0.34	0.037	0.036	0.035
										C	1.09	1.097	1.044	0.808	0.854	0.828	1.121	1.11	0.999	0.035	0.036	0.035
										D	0.203	0.199	0.201	0.404	0.409	0.438	0.164	0.173	0.173	0.036	0.037	0.035
										E	0.036	0.036	0.037	0.036	0.036	0.036	0.037	0.037	0.037	0.038	0.038	0.036
										F	0.038	0.036	0.036	0.037	0.036	0.036	0.036	0.037	0.037	0.036	0.036	0.035
										G	0.035	0.037	0.036	0.037	0.036	0.036	0.036	0.036	0.038	0.037	0.036	0.037
										H	0.034	0.035	0.036	0.036	0.035	0.035	0.036	0.035	0.035	0.036	0.035	0.038
											1	2	3	4	5	6	7	8	9	10	11	12
										A	blank	blank	blank	DMSO NI tps 0	DMSO NI tps 0	DMSO NI tps 0	DMSO PN tps 0	DMSO PN tps 0	DMSO PN tps 0	DMSO O tps 0	DMSO O tps 0	DMSO O tps 0
										B	6- TG NI tps 0	6- TG NI tps 0	6- TG NI tps 0	6- TG PN tps 0	6- TG PN tps 0	6- TG PN tps 0	6- TG O tps 0	6- TG O tps 0	6- TG O tps 0	empty	empty	empty
										C	DMSO NI tps 2 weeks	DMSO NI tps 2 weeks	DMSO NI tps 2 weeks	DMSO PN tps 2 weeks	DMSO PN tps 2 weeks	DMSO PN tps 2 weeks	DMSO O tps 2 weeks	DMSO O tps 2 weeks	DMSO O tps 2 weeks	empty	empty	empty
										D	6- TG NI tps 2 weeks	6- TG NI tps 2 weeks	6- TG NI tps 2 weeks	6- TG PN tps 2 weeks	6- TG PN tps 2 weeks	6- TG PN tps 2 weeks	6- TG O tps 2 weeks	6- TG O tps 2 weeks	6- TG O tps 2 weeks	empty	empty	empty
										E	empty	empty	empty	empty	empty	empty	empty	empty	empty	empty	empty	empty
										F	empty	empty	empty	empty	empty	empty	empty	empty	empty	empty	empty	empty
										G	empty	empty	empty	empty	empty	empty	empty	empty	empty	empty	empty	empty
										H	empty	empty	empty	empty	empty	empty	empty	empty	empty	empty	empty	empty
											Day 0						Day 14
											Exp.G		PSNE -5 to +20mm		PSNE +22 to 47mm		Exp.G		PSNE -5 to +20mm		PSNE +22 to 47mm
											DMSO	6-TG	DMSO	6-TG	DMSO	6-TG	DMSO	6-TG	DMSO	6-TG	DMSO	6-TG
											0.423	0.497	0.411	0.396	0.548	0.355	1.09	0.203	0.808	0.404	1.121	0.164
											0.441	0.466	0.382	0.406	0.545	0.359	1.097	0.199	0.854	0.409	1.11	0.173
											0.436	0.444	0.383	0.403	0.556	0.34	1.044	0.201	0.828	0.438	0.999	0.173
									Normalized		Day 0						Day 14
											Exp.G		PSNE -5 to +20mm		PSNE +22 to 47mm		Exp.G		PSNE -5 to +20mm		PSNE +22 to 47mm
											DMSO	6-TG	DMSO	6-TG	DMSO	6-TG	DMSO	6-TG	DMSO	6-TG	DMSO	6-TG
											1	1	1	1	1	1	2.57683	0.408451	1.96594	1.0202	2.04562	0.461972
											1	1	1	1	1	1	2.48753	0.427039	2.2356	1.00739	2.0367	0.481894
											1	1	1	1	1	1	2.3945	0.452703	2.16188	1.08685	1.79676	0.508824
									% 6-TG surviving cell		Day 0						Day 14
											Exp.G		PSNE -5 to +20mm		PSNE +22 to 47mm		Exp.G		PSNE -5 to +20mm		PSNE +22 to 47mm
											DMSO	6-TG	DMSO	6-TG	DMSO	6-TG	%surviving cell		%surviving cell		%surviving cell
											1	1	1	1	1	1	0.158509		0.518939		0.225835
											1	1	1	1	1	1	0.171672		0.450612		0.236606
											1	1	1	1	1	1	0.18906		0.502733		0.283189
												Day 0			Day 14					Day 0			Day 14
												Exp.G	PSNE		Exp.G	PSNE				Exp.G	PSNE		Exp.G	PSNE
													-5 to +20mm	+22 to +47mm		-5 to +20mm	+22 to +47mm				-5 to +20mm	+22 to +47mm		-5 to +20mm	+22 to +47mm
											mean	1	1	1	0.17308	0.490762	0.248543		mean	100	100	100	17.308	49.0762	24.8543
											SD	0	0	0	0.0153241	0.0357022	0.0304838		SD	0	0	0	1.53241	3.57022	3.04838
											Ttest					0.00127322	0.0322803		Ttest					0.00127322	0.0322803
													NS	NS		**	*				NS	NS		**	*

## Sheet: normalized
Measurement count: 1 Filter: 570
	1	2	3	4	5	6	7	8	9	10	11	12		1	2	3	4	5	6	7	8	9	10	11	12
A	0.048	0.051	0.046	0.423	0.441	0.436	0.411	0.382	0.383	0.548	0.545	0.556		0.048	0.051	0.046	0.423	0.441	0.436	0.411	0.382	0.383	0.548	0.545	0.556
B	0.497	0.466	0.444	0.396	0.406	0.403	0.355	0.359	0.34					0.497	0.466	0.444	0.396	0.406	0.403	0.355	0.359	0.34
C	1.09	1.097	1.044	0.808	0.854	0.828	1.121	1.11	0.999					2.57683	2.48753	2.3945	1.96594	2.2356	2.16188	2.04562	2.0367	1.79676
D	0.203	0.199	0.201	0.404	0.409	0.438	0.164	0.173	0.173					0.408451	0.427039	0.452703	1.0202	1.00739	1.08685	0.461972	0.481894	0.508824
E
F
G
H
	1	2	3	4	5	6	7	8	9	10	11	12
A	blank	blank	blank	DMSO NI tps 0	DMSO NI tps 0	DMSO NI tps 0	DMSO PN tps 0	DMSO PN tps 0	DMSO PN tps 0	DMSO O tps 0	DMSO O tps 0	DMSO O tps 0
B	6- TG NI tps 0	6- TG NI tps 0	6- TG NI tps 0	6- TG PN tps 0	6- TG PN tps 0	6- TG PN tps 0	6- TG O tps 0	6- TG O tps 0	6- TG O tps 0	empty	empty	empty
C	DMSO NI tps 2 weeks	DMSO NI tps 2 weeks	DMSO NI tps 2 weeks	DMSO PN tps 2 weeks	DMSO PN tps 2 weeks	DMSO PN tps 2 weeks	DMSO O tps 2 weeks	DMSO O tps 2 weeks	DMSO O tps 2 weeks	empty	empty	empty
D	6- TG NI tps 2 weeks	6- TG NI tps 2 weeks	6- TG NI tps 2 weeks	6- TG PN tps 2 weeks	6- TG PN tps 2 weeks	6- TG PN tps 2 weeks	6- TG O tps 2 weeks	6- TG O tps 2 weeks	6- TG O tps 2 weeks	empty	empty	empty
E	empty	empty	empty	empty	empty	empty	empty	empty	empty	empty	empty	empty
F	empty	empty	empty	empty	empty	empty	empty	empty	empty	empty	empty	empty
G	empty	empty	empty	empty	empty	empty	empty	empty	empty	empty	empty	empty
H	empty	empty	empty	empty	empty	empty	empty	empty	empty	empty	empty	empty
			Day 0						Day 14							Non irradiated		margin - 5 to +21mm		margin + 22 to + 47 mm			DMSO			6-TG
			Non irradiated		margin from - 5 to 20		margin from 22 to 47 mm		Non irradiated		margin from - 5 to 21		margin from 22 to 47 mm			DMSO	6-TG	DMSO	6-TG	DMSO	6-TG		Non irradiated	margin from - 5 to 21	margin from 22 to 47 mm	Non irradiated	margin from - 5 to 22	margin from 22 to 47 mm
			DMSO	6-TG	DMSO	6-TG	DMSO	6-TG	DMSO	6-TG	DMSO	6-TG	DMSO	6-TG	moyenne	2.48629	0.429397	2.12114	1.03815	1.95969	0.48423		2.48629	2.12114	1.95969	0.429397	1.03815	0.48423
		moyenne	0.433333	0.469	0.392	0.401667	0.549667	0.351333	1.077	0.201	0.83	0.417	1.07667	0.17	ecart-type	0.0911747	0.0222201	0.139372	0.042661	0.141173	0.023513
		écart type	0.00929157	0.0266271	0.0164621	0.0051316	0.00568624	0.0100167	0.0287924	0.002	0.0230651	0.0183576	0.0674858	0.00519615	t test			0.0191455	2.56309e-05	0.00558993	0.0425718
			#DIV/0!

## Sheet: brut
Measurement count: 1 Filter: 570
	1	2	3	4	5	6	7	8	9	10	11	12
A	0.048	0.051	0.046	0.423	0.441	0.436	0.411	0.382	0.383	0.548	0.545	0.556
B	0.497	0.466	0.444	0.396	0.406	0.403	0.355	0.359	0.34	0.037	0.036	0.035
C	1.09	1.097	1.044	0.808	0.854	0.828	1.121	1.11	0.999	0.035	0.036	0.035
D	0.203	0.199	0.201	0.404	0.409	0.438	0.164	0.173	0.173	0.036	0.037	0.035
E	0.036	0.036	0.037	0.036	0.036	0.036	0.037	0.037	0.037	0.038	0.038	0.036				Exp. Growth				Emerging cells
F	0.038	0.036	0.036	0.037	0.036	0.036	0.036	0.037	0.037	0.036	0.036	0.035				DMSO		6 TG		DMSO		6 TG
G	0.035	0.037	0.036	0.037	0.036	0.036	0.036	0.036	0.038	0.037	0.036	0.037				Day 3	Day 8	Day 3	Day 8	Day 3	Day 8	Day 3	Day 8
H	0.034	0.035	0.036	0.036	0.035	0.035	0.036	0.035	0.035	0.036	0.035	0.038			moy	1.81254	2.8178	0.276748	0.258797	1.87929	0.036	0.038	0
															EcT	0.0539565	0.0825848	0.00591483	0.00505493	0.0484635	0.0565212	0.00933175	0.0144748
	1	2	3	4	5	6	7	8	9	10	11	12
A	blank	blank	blank	DMSO NI tps 0	DMSO NI tps 0	DMSO NI tps 0	DMSO PN tps 0	DMSO PN tps 0	DMSO PN tps 0	DMSO O tps 0	DMSO O tps 0	DMSO O tps 0
B	6- TG NI tps 0	6- TG NI tps 0	6- TG NI tps 0	6- TG PN tps 0	6- TG PN tps 0	6- TG PN tps 0	6- TG O tps 0	6- TG O tps 0	6- TG O tps 0	empty	empty	empty
C	DMSO NI tps 2 weeks	DMSO NI tps 2 weeks	DMSO NI tps 2 weeks	DMSO PN tps 2 weeks	DMSO PN tps 2 weeks	DMSO PN tps 2 weeks	DMSO O tps 2 weeks	DMSO O tps 2 weeks	DMSO O tps 2 weeks	empty	empty	empty
D	6- TG NI tps 2 weeks	6- TG NI tps 2 weeks	6- TG NI tps 2 weeks	6- TG PN tps 2 weeks	6- TG PN tps 2 weeks	6- TG PN tps 2 weeks	6- TG O tps 2 weeks	6- TG O tps 2 weeks	6- TG O tps 2 weeks	empty	empty	empty
E	empty	empty	empty	empty	empty	empty	empty	empty	empty	empty	empty	empty
F	empty	empty	empty	empty	empty	empty	empty	empty	empty	empty	empty	empty
G	empty	empty	empty	empty	empty	empty	empty	empty	empty	empty	empty	empty
H	empty	empty	empty	empty	empty	empty	empty	empty	empty	empty	empty	empty
			Day 0						Day 14
			Non irradiated		margin from - 5 to 20		margin from 22 to 47 mm		Non irradiated		margin from - 5 to 21		margin from 22 to 47 mm
			DMSO	6-TG	DMSO	6-TG	DMSO	6-TG	DMSO	6-TG	DMSO	6-TG	DMSO	6-TG
		moyenne	0.433333	0.469	0.392	0.401667	0.549667	0.351333	1.077	0.201	0.83	0.417	1.07667	0.17
		écart type	0.00929157	0.0266271	0.0164621	0.0051316	0.00568624	0.0100167	0.0287924	0.002	0.0230651	0.0183576	0.0674858	0.00519615
			#DIV/0!
