# Supplementary material for: The out-of-field dose in radiation therapy induces delayed tumorigenesis by senescence evasion
Source: eLife. 2022 Mar 18;11:e67190. doi: 10.7554/eLife.67190 (PMC8933005; doi:10.7554/eLife.67190)
Supplement: Figure 6—source data 1. [file elife-67190-fig6-data1.xlsx]

## Sheet: Feuil1
		Figure 6-source data 1
			jour	0	4	7	11	14	38	50	64
			Non-irradiated	30.2794	31.5589	32.6744	33.9963	34.9963
			PTV	30.2794	28.8219	27.5
			Margin -5 to +33mm	30.2794	30.6293	31.2142	31.1402	30.5246	31.2138	31.9031	32.7262
			Margin +35 to +73mm	30.2794	31.4069	32.4069	32.7288	32.6699	35.4069	36.8699	38.3329
jeune	1 DP en 1,5 jours
emergente	1 DP en 3,5 jour
