# Supplementary material for: The out-of-field dose in radiation therapy induces delayed tumorigenesis by senescence evasion
Source: eLife. 2022 Mar 18;11:e67190. doi: 10.7554/eLife.67190 (PMC8933005; doi:10.7554/eLife.67190)
Supplement: Figure 6—source data 2. [file elife-67190-fig6-data2.xlsx]

## Sheet: brut
	1	2	3	4	5	6	7	8	9	10	11	12
A	young 0h DMSO	young 0h DMSO	young 0h DMSO							young 0h 6TG	young 0h 6TG	young 0h 6TG
B	young 72h DMSO	young 72h DMSO	young 72h DMSO							young 72h 6TG	young 72h 6TG	young 72h 6TG
C	young 120h DMSO	young 120h DMSO	young 120h DMSO							young 120h 6TG	young 120h 6TG	young 120h 6TG
D
E
F	emergente 0h DMSO	emergente 0h DMSO	emergente 0h DMSO							emergente 0h 6TG	emergente 0h 6TG	emergente 0h 6TG
G	emergente 72h DMSO	emergente 72h DMSO	emergente 72h DMSO							emergente 72h 6TG	emergente 72h 6TG	emergente 72h 6TG
H	emergente 120h DMSO	emergente 120h DMSO	emergente 120h DMSO							emergente 120h 6TG	emergente 120h 6TG	emergente 120h 6TG
	Measurement count: 1 Filter: 570
		1	2	3	4	5	6	7	8	9	10	11	12
	A	0.293	0.296	0.309							0.596	0.588	0.601
	B	0.53	0.553	0.544							0.169	0.161	0.164
	C	0.847	0.839	0.843							0.157	0.149	0.156
	D
	E
	F	0.3	0.293	0.311							0.404	0.399	0.418
	G	0.567	0.563	0.568							0.247	0.247	0.251
	H	0.696	0.69	0.698							0.568	0.558	0.576

## Sheet: publi
	1	2	3	4	5	6	7	8	9	10	11	12
A	young 0h DMSO	young 0h DMSO	young 0h DMSO							young 0h 6TG	young 0h 6TG	young 0h 6TG
B	young 72h DMSO	young 72h DMSO	young 72h DMSO							young 72h 6TG	young 72h 6TG	young 72h 6TG
C	young 120h DMSO	young 120h DMSO	young 120h DMSO							young 120h 6TG	young 120h 6TG	young 120h 6TG
D
E
F	emergente 0h DMSO	emergente 0h DMSO	emergente 0h DMSO							emergente 0h 6TG	emergente 0h 6TG	emergente 0h 6TG
G	emergente 72h DMSO	emergente 72h DMSO	emergente 72h DMSO							emergente 72h 6TG	emergente 72h 6TG	emergente 72h 6TG
H	emergente 120h DMSO	emergente 120h DMSO	emergente 120h DMSO							emergente 120h 6TG	emergente 120h 6TG	emergente 120h 6TG
	Measurement count: 1 Filter: 570
		1	2	3	4	5	6	7	8	9	10	11	12
BRUT	A	0.293	0.296	0.309							0.596	0.588	0.601
	B	0.53	0.553	0.544							0.169	0.161	0.164
	C	0.847	0.839	0.843							0.157	0.149	0.156
	D
	E
	F	0.3	0.293	0.311							0.404	0.399	0.418
	G	0.567	0.563	0.568							0.247	0.247	0.251
	H	0.696	0.69	0.698							0.568	0.558	0.576
	Measurement count: 1 Filter: 570
		1	2	3	4	5	6	7	8	9	10	11	12
Normalisé	A	1	1	1							1	1	1
	B	1.80887	1.86824	1.76052							0.283557	0.27381	0.272879
	C	2.89078	2.83446	2.72816							0.263423	0.253401	0.259567
	D
	E
	F	1	1	1							1	1	1
	G	1.89	1.9215	1.82637							0.611386	0.619048	0.600478
	H	2.32	2.35495	2.24437							1.40594	1.3985	1.37799
								Mean	SD	T.Test
		% of surviving cell	Exp. G	Day 0	100	100	100	100	0
				Day 3	15.6759	14.656	15.4999	15.2773	0.545185
				Day 8	9.1125	8.94002	9.51439	9.18897	0.294721
			PSNE	Day 0	100	100	100	100	0	#DIV/0!
				Day 3	32.3485	32.2169	32.8783	32.4812	0.350133	6.9486e-06	***
				Day 8	60.6009	59.3854	61.3976	60.4613	1.01331	4.0343e-05	***
				Day 0			Day 3			Day 8
				Exp.G	PSNE		Exp.G	PSNE		Exp.G	PSNE
			mean	100	100		15.2773	32.4812		9.18897	60.4613
			SD	0	0		0.545185	0.350133		0.294721	1.01331
								***			***
								, ,x
