# Supplementary material for: The out-of-field dose in radiation therapy induces delayed tumorigenesis by senescence evasion
Source: eLife. 2022 Mar 18;11:e67190. doi: 10.7554/eLife.67190 (PMC8933005; doi:10.7554/eLife.67190)
Supplement: Figure 6—source data 4. [file elife-67190-fig6-data4.xlsx]

## Sheet: migration
	Migration
	exponential growth #1					exponential growth #2
cell number	39	42	37	33	49	32	34	27	35	27
	Migration
	emergente PN #1					emergente PN #2					emergente PN #3
cell number	43	46	46	45	25	33	50	43	42	30	52	44	43	31	43

## Sheet: invasion
invasion
			exponential growth #2
2	2	4	1	2	3	3	2	7	5
			emergente PN #2					emergente PN #3
13	10	13	15	13	14	9	9	10	11	6	17	18	12	12

## Sheet: conclusion
Figure 6-source data 4
conclusion
	Exp.G		PSNE
# cell invasion	2.2	4	13	12.8	10.6
mean	3.1		12.1333
écart type	1.27279		1.33167
t test			0.00483562
	exponential growth		emergente PN
# cell migration	31	40	41	39.6	42.6
mean	35.5		41.0667
écart type	6.36396		1.50111
t test			0.213471
% invasion	0.0873239		3.38462
invasion index	38.7593
				non irradiée
				cellules emergentes ( marge proximale )
