# Supplementary material for: The out-of-field dose in radiation therapy induces delayed tumorigenesis by senescence evasion
Source: eLife. 2022 Mar 18;11:e67190. doi: 10.7554/eLife.67190 (PMC8933005; doi:10.7554/eLife.67190)
Supplement: Figure 7—figure supplement 1—source data 2. [file elife-67190-fig7-figsupp1-data2.xlsx]

## Sheet: Feuil1
Figure 7-figure supplement 1-source data 2
53BP1	jours	NT	H2O2	ABT888	H2O2 + ABT 888
										D0	D8	D11	D14	D18	D21	D25
										0	8	11	14	18	21	25
									nt	0.666667	1.07407	1.11111	2.52632	2.17143	2.95	3.51852
	8	0	8	7	1				H2O2	0.964286	2.10526	1.45833	2.97222	2.96429	1.27273	4.85185
	8	5	0	0	0				veliparib	2.84848	2.33333	2.6875	1.39535	2.33333	2.71354	3.09375
	8	5	0	2	0				veliparib+h2o2	1.55	0.625	0.789474	1.17391	4.19048	2.14286	1.28
	8	5	3	3	0
	8	6	5	0	3
	8	8	4	6	2					écart type
	8	5	3	5	1					0	8	11	14	18	21	25
	8	5	5	0	3				nt	1.30089	1.68537	1.78311	2.78739	3.52709	3.28907	2.17274
	8	3	12	0	3				h2o2	0.919866	3.98902	6.51732	3.18466	5.98444	2.11058	5.68198
	8	4	3	8	0				abt888	4.67788	3.64797	5.78463	2.0718	2.79455	2.48288	3.1455
	8	8	1	12	5				abt888+h2o2	3.06894	4.09646	0.875388	0.976328	1.45458	11.4503	1.74452
	8	3	1	7	0
	8	2	4	0	0
	8	1	11	0	1						T-test
	8	5	5	5	0					0	8	11	14	18	21	25
	8	4	3	4	1				h2o2	0.217658	0.0612953	0.337363	0.214776	0.262298	0.26927	0.331078
	8	4	2	6	5				abt888	0.00726995	0.0560179	0.0143461	0.0566327	0.022106	0.431859	0.448658
	8	2	29	6	0				abt888+h2o2	0.119152	0.0761783	0.0028268	0.218469	0.00807673	0.209962	0.0126414
	8	0	3	3	0
	8	1	2	0	0
	8	4	4	2	0
	8	4	9	0	5
	8	2	4	0	2
	8	2	2	0	0						5
	8	5	4	4	0
	8	1	1	1
	8	1	3	0
	8			6																			ju
	8			5
	8			5
	8			2
	8			0
	8
	8
	8
	8
	8	3	4		0
	8	0	0		0
	8	9	0		0
	8	3	6		0
	8	5	0		5
	8	8	0		1
	8	4	0		0
	8	7	3		22
	8	1	3		0
	8	1	0		0
	8	2	0		0
	8	3	0		0
	8	3	5		2
	8	3	7		0
	8	0	3
	8	0	1
	8	0	0
	8	3	0
	8	2	0
	8	0	1
	8	0	1
	8	1	0
	8	13	0
	8	0	0
	8	5	2
	8	9	0
	8	11	0
	8	3	0
	8	3	0
	8	2	6
	8	3	0
	8	0	0
	8	1	0
	8	0
	8	0
	8	2
	8	0
	8	6
	8	1
	8	1
	6	5	30	3	0
	6	3	11	2	51
	6	0	4	4	3
	6	0	1	5	2
	6	6	0	0	0
	6	4	3	0	2
	6	1	0	1	7
	6	0	0	0	6
	6	0	5	0	0
	6	0	1	8	3
	6	0	0	6	1
	6	0	8	0	0
	6	3	3	0	1
	6	3	0	0	4
	6	11	7	6	0
	6	0	0		4
	6	0	0		0
	6	0	2		0
	6	0	2		1
	6	4	1		3
	6	0	2		0
	6	0	0
	6	0	0
	6	0	2
	6	0	1
	6	4	0
	6	6	0
	6	5	0
	6	16
	6	0
	6	0
	6	0
	6	0
	6	2
	6	3
	5	2	10	6	1
	5	11	2	8	1
	5	4	1	0	3
	5	0	12	1	0
	5	5	1	0	3
	5	7	9	2	1
	5	1	3	1	0
	5	2	1	0	0
	5	6	4	0	0
	5	10	1	0	1
	5	0	5	2	4
	5	0	3	2	1
	5	0	1	4	0
	5	0	2	0	3
	5	5	7	0	1
	5	2	3	0	1
	5	2	2	0	0
	5	3	1	1	2
	5	6	0	1	0
	5	3	0	0	0
	5	3	0	0	5
	5	0	2	0	0
	5	1	1	1	0
	5	1	0	1
	5	3	0	5
	5	4	0	0
	5	0	0	0
	5	0	3	0
	5	0	2	0
	5	1	10	4
	5	1	0	3
	5	0	5	2
	5	0	4	1
	5	0	2	6
	5	4	5	0
	5	2	5	6
	5	2		1
	5	5		1
				1
				0
				0
				0
				0
	4	0	0	4	1
	4	0	0	2	0
	4	2	5	2	0
	4	2	4	1	2
	4	1	3	0	0
	4	2	2	5	0
	4	2	1	5	2
	4	0	1	9	1
	4	0	1	2	0
	4	0	1	2	0
	4	0	0	1	0
	4	0	0	0	3
	4	0	0	0	2
	4	1	0	0	0
	4	1	0	2	0
	4	1	0	6	1
	4	1	2	0	2
	4	1	2	0	1
	4	1	2	0	0
	4	0	3	28
	4	0	1	5
	4	1	0	2
	4	1	5	3
	4	1	7	0
	4	0	2	0
	4	9	1	0
	4	3	4	1
	4		1	1
	4		2	0
	4		0	0
	4		0	0
	4		0	5
	4		1
	4		2
	4		1
	4		0
	4		0
	4		0
	4		5
	4		1
	4		7
	4		0
	4		0
	4		2
	4		0
	4		0
	4		0
	4		1
	4
	3	6	3	4	1
	3	4	2	4	0
	3	2	4	4	0
	3	2	1	2	0
	3	2	1	3	0
	3	4	0	4	0
	3	0	2	9	0
	3	0	0		1
	3	0	0		0
	3	0	2		3
	3	0	1		1
	3	1	3		0
	3	2	1		0
	3	6	2		0
	3	1	3		1
	3	1	10		2
	3	1	10		1
	3	2	0		1
	3	4	0		0
	3	0	3		0
	3	2	5		2
	3	4	4		2
	3	1	2		0
	3	0	1		0
			1
			0
			0
			0
			0
			3
			3
			0
			4
			2
			3
			4
			0
			0
	2	4	0	3	7
	2	2	2	0	1
	2	0	0	0	0
	2	0	14	0	0
	2	3	10	8	5
	2	1	1	0	15
	2	4	0	4	1
	2	0	1	5	2
	2	0	0	2	0
	2	0	0	4	0
	2	0	0	2	0
	2	0	7	4	6
	2	1	1	2	1
	2	6	6	0	1
	2	3	2	2	2
	2	0	5	1
	2	0	1	0
	2	0	0	0
	2	0	0	0
	2	2		5
	2	0		4
	2	0		0
	2	0		0
	2	3		17
	2	0		0
	2	0		0
	2	0		0
	1	2	0	4	1
	1	2	1	10	2														j
	1	0	3	0	0
	1	0	2	0	0
	1	0	5	1	0
	1	0	0	1	0
	1	0	1	0	0
	1	0	2	0	0
	1	0	0	9	13
	1	5	0	2	1
	1	4	0	7	3
	1	1	0	6	0
	1	1	0	0	0
	1	1	6	5	0
	1	0	1	2	0
	1	0	0	4	2
	1	2	0	0	1
	1	0	0	0	1
	1	0	0	24	1
	1	0	1	0	6
	1	0	1	0
	1	0	1	0
	1	0	0	0
	1	0	0	0
	1	0	1	0
	1	0	1	0
	1	0	1	3
			0	2
				2
				5
				2
				3
				2
