# Supplementary material for: The out-of-field dose in radiation therapy induces delayed tumorigenesis by senescence evasion
Source: eLife. 2022 Mar 18;11:e67190. doi: 10.7554/eLife.67190 (PMC8933005; doi:10.7554/eLife.67190)
Supplement: Figure 7—figure supplement 1—source data 3. [file elife-67190-fig7-figsupp1-data3.xlsx]

## Sheet: Feuil1
01/04/2016 NT	hogg1	treshold 56
c:3/3 - IP-ApoTome-17.czi #1	132	7.644	0.058	2.724	255
c:3/3 - IP-ApoTome-17.czi #1	35	1.352	0.039	0.794	255
c:3/3 - IP-ApoTome-17.czi #1	37	3.094	0.084	1.439	255
c:3/3 - IP-ApoTome-17.czi #1	145	16.901	0.117	4.752	255
c:3/3 - IP-ApoTome-17.czi #1	51	2.184	0.043	0.786	255
c:3/3 - IP-ApoTome-16.czi #1	88	10.011	0.114	5.133	255
c:3/3 - IP-ApoTome-16.czi #1	30	1.274	0.042	0.371	255
c:3/3 - IP-ApoTome-16.czi #1	59	2.652	0.045	0.988	255
c:3/3 - IP-ApoTome-15.czi #1	23	1.092	0.047	0.501	255
c:3/3 - IP-ApoTome-15.czi #1	177	20.255	0.114	4.478	255
c:3/3 - IP-ApoTome-15.czi #1	117	6.422	0.055	2.223	255
c:3/3 - IP-ApoTome-15.czi #1	124	8.997	0.073	2.374	255
c:3/3 - IP-ApoTome-14.czi #1	361	33.100	0.092	8.084	255
c:3/3 - IP-ApoTome-14.czi #1	211	30.448	0.144	11.225	255
c:3/3 - IP-ApoTome-14.czi #1	314	35.232	0.112	10.817	255
c:3/3 - IP-ApoTome-14.czi #1	3	0.130	0.043	0.040	255
c:3/3 - IP-ApoTome-13.czi #1	33	1.352	0.041	0.399	255
c:3/3 - IP-ApoTome-13.czi #1	128	6.708	0.052	2.262	255
c:3/3 - IP-ApoTome-13.czi #1	48	1.898	0.040	0.676	255
c:3/3 - IP-ApoTome-13.czi #1	43	1.742	0.041	0.664	255
c:3/3 - IP-ApoTome-13.czi #1	6	0.156	0.026	0.065	255
	0
	0
	0
c:3/3 - IP-ApoTome-11.czi #1	190	20.879	0.110	10.687	255
c:3/3 - IP-ApoTome-11.czi #1	329	32.086	0.098	10.606	255
c:1/3 - IP-ApoTome-11.czi #1	60	8.164	0.136	3.402	255
c:3/3 - IP-ApoTome-11.czi #1	0	0	NaN	0	NaN
c:3/3 - IP-ApoTome-10.czi #1	0	0	NaN	0	NaN
c:3/3 - IP-ApoTome-10.czi #1	231	14.067	0.061	0.037	255
c:3/3 - IP-ApoTome-10.czi #1	17	0.520	0.031	0.217	255
	0
c:3/3 - IP-ApoTome-09.czi #1	27	2.782	0.103	1.483	255
c:3/3 - IP-ApoTome-09.czi #1	27	2.782	0.103	1.483	255
c:3/3 - IP-ApoTome-09.czi #1	3	0.676	0.225	0.286	255
c:3/3 - IP-ApoTome-09.czi #1	34	13.859	0.408	5.453	255
c:3/3 - IP-ApoTome-08.czi #1	120	12.897	0.107	4.264	255
c:3/3 - IP-ApoTome-08.czi #1	85	7.176	0.084	2.935	255
	0
	0
c:3/3 - IP-ApoTome-06.czi #1	110	5.772	0.052	2.558	0
c:3/3 - IP-ApoTome-06.czi #1	0	0	NaN	0	NaN
c:3/3 - IP-ApoTome-06.czi #1	69	6.448	0.093	2.324	255
c:3/3 - IP-ApoTome-06.czi #1	67	4.628	0.069	2.115	255
c:3/3 - IP-ApoTome-06.czi #1	23	1.664	0.072	0.574	255
c:3/3 - IP-ApoTome-06.czi #1	0	0	NaN	0	NaN
c:3/3 - IP-ApoTome-22.czi #1	358	35.466	0.099	9.303	255
c:3/3 - IP-ApoTome-22.czi #1	167	18.461	0.111	8.725	255
c:3/3 - IP-ApoTome-22.czi #1	289	29.616	0.102	9.736	255
c:3/3 - IP-ApoTome-22.czi #1	12	0.728	0.061	0.171	255
	0
c:3/3 - IP-ApoTome-20.czi #1	226	7.098	0.031	1.726	255
c:3/3 - IP-ApoTome-20.czi #1	170	5.148	0.030	1.133	255
c:1/3 - IP-ApoTome-20.czi #1	11	0.312	0.028	0.106	255
c:3/3 - IP-ApoTome-20.czi #1	197	6.058	0.031	2.055	255
01/04/2016 H
c:3/3 - IP-ApoTome-15.czi #1	10	0.364	0.036	0.208	255
c:3/3 - IP-ApoTome-15.czi #1	1	0.026	0.026	0.007	255
c:3/3 - IP-ApoTome-15.czi #1	72	2.366	0.033	1.755	255
c:3/3 - IP-ApoTome-19.czi #1	5	0.130	0.026	0.054	255
c:3/3 - IP-ApoTome-19.czi #1	60	1.846	0.031	0.162	255
c:3/3 - IP-ApoTome-18.czi #1	10	20.203	2.020	3.772	255
c:3/3 - IP-ApoTome-18.czi #1	26	3.042	0.117	0.538	255
c:3/3 - IP-ApoTome-17.czi #1	10	0.312	0.031	0.053	255
c:3/3 - IP-ApoTome-17.czi #1	8	0.208	0.026	0.038	255
c:3/3 - IP-ApoTome-15.czi #1	26	4.134	0.159	2.291	255
c:3/3 - IP-ApoTome-15.czi #1	0	0	NaN	0	NaN
c:3/3 - IP-ApoTome-15.czi #1	4	0.130	0.033	0.034	255
c:3/3 - IP-ApoTome-15.czi #1	75	13.001	0.173	8.514	255
c:3/3 - IP-ApoTome-14.czi #1	0	0	NaN	0	NaN
c:3/3 - IP-ApoTome-14.czi #1	0	0	NaN	0	NaN
c:1/3 - IP-ApoTome-13.czi #1	55	1.612	0.029	0.419	255
c:3/3 - IP-ApoTome-13.czi #1	10	0.260	0.026	0.123	255
c:3/3 - IP-ApoTome-13.czi #1	65	1.950	0.030	0.300	255
c:3/3 - IP-ApoTome-13.czi #1	273	8.451	0.031	1.311	255
c:3/3 - IP-ApoTome-13.czi #1	9	0.338	0.038	0.047	255
c:3/3 - IP-ApoTome-12.czi #1	23	1.638	0.071	0.369	255
c:3/3 - IP-ApoTome-12.czi #1	26	2.288	0.088	0.326	255
c:3/3 - IP-ApoTome-11.czi #1	0	0	NaN	0	NaN
c:3/3 - IP-ApoTome-11.czi #1	0	0	NaN	0	NaN
c:3/3 - IP-ApoTome-11.czi #1	0	0	NaN	0	NaN
c:3/3 - IP-ApoTome-11.czi #1	0	0	NaN	0	NaN
c:3/3 - IP-ApoTome-09.czi #1	17	0.468	0.028	0.070	255
c:3/3 - IP-ApoTome-09.czi #1	1	0.026	0.026	0.003	255
c:3/3 - IP-ApoTome-10.czi #1	0	0	NaN	0	NaN
c:3/3 - IP-ApoTome-10.czi #1	1	0.026	0.026	0.004	255
c:3/3 - IP-ApoTome-08.czi #1	0	0	NaN	0	NaN
c:3/3 - IP-ApoTome-08.czi #1	3	0.078	0.026	0.006	255
c:3/3 - IP-ApoTome-08.czi #1	7	0.208	0.030	0.018	255
c:3/3 - IP-ApoTome-08.czi #1	125	3.848	0.031	0.740	255
c:3/3 - IP-ApoTome-03.czi #1	0	0	NaN	0	NaN
c:3/3 - IP-ApoTome-03.czi #1	0	0	NaN	0	NaN
c:3/3 - IP-ApoTome-02.czi #1	10	0.286	0.029	0.040	255
c:3/3 - IP-ApoTome-02.czi #1	7	0.182	0.026	0.030	255
c:3/3 - IP-ApoTome-02.czi #1	0	0	NaN	0	NaN
c:3/3 - IP-ApoTome-19.czi #1	5	0.130	0.026	0.054	255
c:3/3 - IP-ApoTome-19.czi #1	60	1.846	0.031	0.162	255
01/04/2016 A1µM
c:3/3 - IP-ApoTome-20.czi #1	70	3.718	0.053	1.121	255
c:3/3 - IP-ApoTome-20.czi #1	234	34.920	0.149	6.167	255
c:3/3 - IP-ApoTome-19.czi #1	214	6.292	0.029	1.704	255
c:3/3 - IP-ApoTome-19.czi #1	290	8.503	0.029	1.676	255
c:3/3 - IP-ApoTome-18.czi #1	15	0.468	0.031	0.168	255
c:3/3 - IP-ApoTome-18.czi #1	59	5.408	0.092	3.945	255
c:3/3 - IP-ApoTome-18.czi #1	102	18.071	0.177	8.140	255
c:3/3 - IP-ApoTome-17.czi #1	332	40.224	0.121	5.202	255
c:3/3 - IP-ApoTome-17.czi #1	282	40.718	0.144	6.851	255
c:3/3 - IP-ApoTome-17.czi #1	181	34.270	0.189	17.269	255
c:3/3 - IP-ApoTome-16.czi #1	0	0	NaN	0	NaN
c:3/3 - IP-ApoTome-16.czi #1	168	4.680	0.028	0.433	255
c:3/3 - IP-ApoTome-16.czi #1	111	3.458	0.031	1.020	255

## Sheet: Feuil2
Figure 7-figure supplement 1-source data 3
hOGG1	01/04/2016 NT	NT	treshold 64
	c:3/3 - IP-ApoTome-16.czi #1	42	2.106	0.050	1.154	255
	c:3/3 - IP-ApoTome-16.czi #1	7	0.234	0.033	0.058	255
	c:3/3 - IP-ApoTome-16.czi #1	24	0.780	0.033	0.246	255		cond.	NT	H	A1µM	A1nM	HA1µM	HAnM
	c:3/3 - IP-ApoTome-16.czi #1	23	1.560	0.068	0.524	255		moy	13.8182	13.6136	15.0968	20.087	19.963	22.4286
	c:3/3 - IP-ApoTome-16.czi #1	1	0.026	0.026	0.011	255		écart type	19.538	21.2102	21.8881	21.3113	24.3539	28.8142
	c:3/3 - IP-ApoTome-15.czi #1	66	1.976	0.030	0.643	255		test		0.481292	0.397768	0.0745431	0.13636	0.11243
	c:3/3 - IP-ApoTome-15.czi #1	29	1.040	0.036	0.284	255
	c:1/3 - IP-ApoTome-14.czi #1	12	0.338	0.028	0.078	255
	c:3/3 - IP-ApoTome-14.czi #1	0	0	NaN	0	NaN
	c:3/3 - IP-ApoTome-14.czi #1	63	1.924	0.031	0.500	255
	c:3/3 - IP-ApoTome-13.czi #1	0	0	NaN	0	NaN
	c:3/3 - IP-ApoTome-13.czi #1	8	0.208	0.026	0.084	255
		0
		0
		0
	c:3/3 - IP-ApoTome-11.czi #1	75	7.384	0.098	4.924	255
	c:3/3 - IP-ApoTome-11.czi #1	0	0	NaN	0	NaN
	c:3/3 - IP-ApoTome-11.czi #1	1	0.026	0.026	0.010	255
		0
		0
	c:3/3 - IP-ApoTome-09.czi #1	3	0.078	0.026	0.034	255
	c:3/3 - IP-ApoTome-09.czi #1	37	1.222	0.033	0.579	255
	c:3/3 - IP-ApoTome-09.czi #1	12	0.364	0.030	0.213	255
	c:3/3 - IP-ApoTome-09.czi #1	0	0	NaN	0	NaN			cond.	Non treated	H2O2 5µM	Veliparib 1µM	Veliparib + H2O2
	c:3/3 - IP-ApoTome-09.czi #1	0	0	NaN	0	NaN			moy	13.8182	13.6136	15.0968	19.963
	c:3/3 - IP-ApoTome-08.czi #1	9	0.234	0.026	0.111	255			écart type	19.538	21.2102	21.8881	24.3539
	c:3/3 - IP-ApoTome-08.czi #1	7	0.208	0.030	0.183	255			test		0.481292	0.397768	0.13636
	c:3/3 - IP-ApoTome-08.czi #1	0	0	NaN	0	NaN
	c:3/3 - IP-ApoTome-07.czi #1	4	0.104	0.026	0.043	255
	c:3/3 - IP-ApoTome-07.czi #1	25	0.728	0.029	0.292	255
	c:3/3 - IP-ApoTome-07.czi #1	0	0	NaN	0	NaN
	c:3/3 - IP-ApoTome-07.czi #1	0	0	NaN	0	NaN
	c:3/3 - IP-ApoTome-06.czi #1	0	0	NaN	0	NaN
	c:3/3 - IP-ApoTome-06.czi #1	0	0	NaN	0	NaN
	c:3/3 - IP-ApoTome-06.czi #1	9	0.416	0.046	0.186	255
	c:3/3 - IP-ApoTome-06.czi #1	39	1.898	0.049	0.718	255
	c:3/3 - IP-ApoTome-06.czi #1	45	2.002	0.044	0.771	255
	c:3/3 - IP-ApoTome-04.czi #1	18	0.572	0.032	0.146	122.139
	c:3/3 - IP-ApoTome-22.czi #1	1	0.026	0.026	0.008	255
	c:3/3 - IP-ApoTome-22.czi #1	0	0	NaN	0	NaN
	c:3/3 - IP-ApoTome-21.czi #1	5	0.130	0.026	0.056	255
	c:3/3 - IP-ApoTome-21.czi #1	17	0.624	0.037	0.369	255
	c:3/3 - IP-ApoTome-21.czi #1	13	0.494	0.038	0.216	255
	c:3/3 - IP-ApoTome-21.czi #1	13	0.806	0.062	0.662	255
	01/04/2016 H
	c:3/3 - IP-ApoTome-02.czi #1	0	0	NaN	0	NaN
	c:3/3 - IP-ApoTome-02.czi #1	0	0	NaN	0	NaN
	c:3/3 - IP-ApoTome-02.czi #1	0	0	NaN	0	NaN
	c:3/3 - IP-ApoTome-01.czi #1	27	0.858	0.032	0.156	255
	c:1/3 - IP-ApoTome-01.czi #1	12	0.364	0.030	0.020	255
	c:3/3 - IP-ApoTome-19.czi #1	29	2.834	0.098	0.297	255
	c:3/3 - IP-ApoTome-19.czi #1	2	0.052	0.026	0.029	255
	c:3/3 - IP-ApoTome-18.czi #1	30	1.274	0.042	0.260	255
	c:3/3 - IP-ApoTome-18.czi #1	14	0.494	0.035	0.078	255
	c:3/3 - IP-ApoTome-09.czi #1	3	0.104	0.035	0.011	255
	c:3/3 - IP-ApoTome-09.czi #1	13	0.364	0.028	0.073	255
	c:3/3 - IP-ApoTome-08.czi #1	0	0	NaN	0	NaN
	c:1/3 - IP-ApoTome-08.czi #1	5	0.468	0.094	0.047	255
	c:3/3 - IP-ApoTome-08.czi #1	0	0	NaN	0	NaN
	c:3/3 - IP-ApoTome-08.czi #1	2	0.130	0.065	0.028	255
	c:3/3 - IP-ApoTome-05.czi #1	0	0	NaN	0	NaN
	c:3/3 - IP-ApoTome-02.czi #1	0	0	NaN	0	NaN
	c:3/3 - IP-ApoTome-01.czi #1	7	0.572	0.082	0.068	255
	c:3/3 - IP-ApoTome-01.czi #1	7	0.572	0.082	0.068	255
	c:3/3 - IP-ApoTome-01.czi #1	39	15.341	0.393	2.339	255
	c:2/2 - IP-ApoTome-20.czi #1	80	15.341	0.192	5.347	255
	c:3/3 - IP-ApoTome-19.czi #1	2	0.208	0.104	0.102	255
	c:3/3 - IP-ApoTome-19.czi #1	41	3.978	0.097	0.346	255
	c:3/3 - IP-ApoTome-18.czi #1	10	22.179	2.218	3.930	255
	c:3/3 - IP-ApoTome-18.czi #1	17	1.794	0.106	0.324	255
	c:3/3 - IP-ApoTome-17.czi #1	40	2.054	0.051	0.419	255
	c:3/3 - IP-ApoTome-17.czi #1	21	0.884	0.042	0.161	255
	c:3/3 - IP-ApoTome-16.czi #1	2	0.208	0.104	0.063	255
	c:3/3 - IP-ApoTome-15.czi #1	4	0.494	0.124	0.089	255
	c:3/3 - IP-ApoTome-15.czi #1	40	2.652	0.066	1.516	255
	c:3/3 - IP-ApoTome-15.czi #1	0	0	NaN	0	NaN
		0
		0
	c:3/3 - IP-ApoTome-13.czi #1	0	0	NaN	0	NaN
	c:3/3 - IP-ApoTome-13.czi #1	99	2.912	0.029	0.657	255
	c:3/3 - IP-ApoTome-13.czi #1	11	0.312	0.028	0.051	255
	c:3/3 - IP-ApoTome-12.czi #1	0	0	NaN	0	NaN
	c:3/3 - IP-ApoTome-12.czi #1	20	1.040	0.052	0.202	255
	c:3/3 - IP-ApoTome-12.czi #1	20	1.274	0.064	0.157	255
	c:3/3 - IP-ApoTome-11.czi #1	0	0	NaN	0	NaN
	c:3/3 - IP-ApoTome-11.czi #1	0	0	NaN	0	NaN
	c:3/3 - IP-ApoTome-11.czi #1	1	0.026	0.026	0.003	255
	c:3/3 - IP-ApoTome-10.czi #1	0	0	NaN	0	NaN
	c:3/3 - IP-ApoTome-10.czi #1	1	0.052	0.052	0.025	255
	01/04/2016 A1µM
	c:1/3 - IP-ApoTome-13.czi #1	4	0.104	0.026	0.012	255
	c:3/3 - IP-ApoTome-13.czi #1	35	1.092	0.031	0.096	255
	c:3/3 - IP-ApoTome-12.czi #1	24	0.650	0.027	0.099	255
	c:3/3 - IP-ApoTome-10.czi #1	2	0.052	0.026	0.007	255
	c:3/3 - IP-ApoTome-10.czi #1	1	0.026	0.026	0.003	255
	c:3/3 - IP-ApoTome-10.czi #1	2	0.052	0.026	0.015	255
		0
	c:3/3 - IP-ApoTome-08.czi #1	13	1.300	0.100	0.330	255
	c:3/3 - IP-ApoTome-07.czi #1	1	0.052	0.052	0.007	255
	c:3/3 - IP-ApoTome-07.czi #1	18	0.494	0.027	0.048	255
	c:3/3 - IP-ApoTome-07.czi #1	3	0.078	0.026	0.009	255
	c:3/3 - IP-ApoTome-05.czi #1	13	0.364	0.028	0.109	255
	c:3/3 - IP-ApoTome-05.czi #1	12	0.338	0.028	0.054	255
	c:3/3 - IP-ApoTome-04.czi #1	46	1.300	0.028	0.330	255
	c:3/3 - IP-ApoTome-04.czi #1	0	0	NaN	0	NaN
	c:3/3 - IP-ApoTome-01.czi #1	22	2.860	0.130	0.467	255
	c:3/3 - IP-ApoTome-01.czi #1	12	0.702	0.059	0.095	255
	c:3/3 - IP-ApoTome-24.czi #1	0	0	NaN	0	NaN
	c:3/3 - IP-ApoTome-24.czi #1	0	0	NaN	0	NaN
	c:3/3 - IP-ApoTome-23.czi #1	18	0.494	0.027	0.080	255
	c:3/3 - IP-ApoTome-23.czi #1	1	0.026	0.026	0.008	255
	c:3/3 - IP-ApoTome-22.czi #1	101	13.833	0.137	2.452	255
	c:3/3 - IP-ApoTome-22.czi #1	6	4.654	0.776	0.534	255
	c:3/3 - IP-ApoTome-20.czi #1	39	5.252	0.135	1.489	255
	c:3/3 - IP-ApoTome-19.czi #1	20	1.144	0.057	0.401	255
	c:3/3 - IP-ApoTome-19.czi #1	14	0.780	0.056	0.324	255
	c:3/3 - IP-ApoTome-18.czi #1	0	0	NaN	0	NaN
	c:3/3 - IP-ApoTome-18.czi #1	58	11.571	0.199	10.387	255
	c:3/3 - IP-ApoTome-16.czi #1	3	0.208	0.069	0.094	255
	c:3/3 - IP-ApoTome-16.czi #1	0	0	NaN	0	NaN
	c:3/3 - IP-ApoTome-16.czi #1	0	0	NaN	0	NaN
	01/04/2016 A1nM
	c:3/3 - IP-ApoTome-10.czi #1	8	0.520	0.065	0.151	255
	c:3/3 - IP-ApoTome-09.czi #1	0	0	NaN	0	NaN
	c:3/3 - IP-ApoTome-09.czi #1	0	0	NaN	0	NaN
	c:3/3 - IP-ApoTome-08.czi #1	22	1.898	0.086	0.587	255
	c:3/3 - IP-ApoTome-08.czi #1	1	0.052	0.052	0.016	255
	c:3/3 - IP-ApoTome-07.czi #1	20	3.900	0.195	1.066	255
	c:3/3 - IP-ApoTome-07.czi #1	74	19.943	0.270	5.188	255
	c:3/3 - IP-ApoTome-06.czi #1	38	13.729	0.361	5.346	255
	c:3/3 - IP-ApoTome-06.czi #1	4	0.494	0.124	0.164	255
	c:3/3 - IP-ApoTome-05.czi #1	2	0.130	0.065	0.032	255
	c:3/3 - IP-ApoTome-04.czi #1	17	2.730	0.161	0.734	255
	c:3/3 - IP-ApoTome-04.czi #1	1	0.052	0.052	0.026	255
	c:3/3 - IP-ApoTome-03.czi #1	39	7.904	0.203	2.191	255
	c:3/3 - IP-ApoTome-03.czi #1	10	1.144	0.114	0.348	255
	c:3/3 - IP-ApoTome-03.czi #1	63	15.367	0.244	3.285	255
	c:3/3 - IP-ApoTome-01.czi #1	10	0.624	0.062	0.159	255
	c:3/3 - IP-ApoTome-01.czi #1	0	0	NaN	0	NaN
	c:3/3 - IP-ApoTome-37.czi #1	42	14.405	0.343	5.624	255
	c:3/3 - IP-ApoTome-35.czi #1	20	2.184	0.109	1.713	255
	c:3/3 - IP-ApoTome-35.czi #1	2	0.104	0.052	0.296	255
	c:3/3 - IP-ApoTome-34.czi #1	2	0.104	0.052	0.039	255
	c:3/3 - IP-ApoTome-34.czi #1	7	0.494	0.071	0.178	255
	c:3/3 - IP-ApoTome-34.czi #1	30	2.782	0.093	0.465	255
	c:3/3 - IP-ApoTome-33.czi #1	24	1.820	0.076	0.661	255
	c:3/3 - IP-ApoTome-33.czi #1	34	3.718	0.109	1.039	255
	c:3/3 - IP-ApoTome-32.czi #1	10	0.754	0.075	0.328	255
	c:3/3 - IP-ApoTome-31.czi #1	1	0.026	0.026	0.006	255
	c:3/3 - IP-ApoTome-31.czi #1	0	0	NaN	0	NaN
	c:3/3 - IP-ApoTome-30.czi #1	7	0.182	0.026	0.060	255
	c:3/3 - IP-ApoTome-30.czi #1	21	0.728	0.035	0.242	255
	c:3/3 - IP-ApoTome-29.czi #1	54	8.997	0.167	2.914	255
	c:3/3 - IP-ApoTome-28.czi #1	72	2.262	0.031	0.494	255
	c:3/3 - IP-ApoTome-28.czi #1	80	2.366	0.030	0.885	255
	c:3/3 - IP-ApoTome-27.czi #1	18	1.456	0.081	2.824	255
	c:3/3 - IP-ApoTome-26.czi #1	34	1.898	0.056	0.538	255
	c:3/3 - IP-ApoTome-26.czi #1	14	0.936	0.067	0.317	255
	c:3/3 - IP-ApoTome-16.czi #1	0	0	NaN	0	NaN
	c:3/3 - IP-ApoTome-15.czi #1	33	2.106	0.064	0.421	255
	c:3/3 - IP-ApoTome-15.czi #1	26	1.508	0.058	0.727	255
	c:3/3 - IP-ApoTome-14.czi #1	2	0.104	0.052	0.047	255
	c:3/3 - IP-ApoTome-14.czi #1	16	0.884	0.055	0.296	255
	c:3/3 - IP-ApoTome-14.czi #1	2	0.104	0.052	0.047	255
	c:3/3 - IP-ApoTome-14.czi #1	16	0.884	0.055	0.296	255
	c:3/3 - IP-ApoTome-14.czi #1	18	0.988	0.055	0.325	255
	c:3/3 - IP-ApoTome-13.czi #1	0	0	NaN	0	NaN
	c:3/3 - IP-ApoTome-13.czi #1	30	2.990	0.100	1.696	255
	01/04/2016 HA1µM
	c:3/3 - IP-ApoTome-29.czi #1	2	0.286	0.143	0.083	255
	c:3/3 - IP-ApoTome-29.czi #1	13	2.730	0.210	0.737	255
	c:3/3 - IP-ApoTome-27.czi #1	6	0.338	0.056	0.067	255
	c:3/3 - IP-ApoTome-27.czi #1	2	0.104	0.052	0.010	255
	c:3/3 - IP-ApoTome-26.czi #1	49	37.702	0.769	12.223	255
	c:3/3 - IP-ApoTome-26.czi #1	43	5.954	0.138	1.583	255
	c:3/3 - IP-ApoTome-25.czi #1	30	10.869	0.362	7.862	255
	c:3/3 - IP-ApoTome-24.czi #1	10	0.702	0.070	0.327	255
	c:3/3 - IP-ApoTome-24.czi #1	0	0	NaN	0	NaN
	c:3/3 - IP-ApoTome-23.czi #1	6	0.312	0.052	0.038	255
	c:3/3 - IP-ApoTome-23.czi #1	26	4.888	0.188	3.346	255
	c:3/3 - IP-ApoTome-19.czi #1	39	3.302	0.085	2.505	255
	c:3/3 - IP-ApoTome-18.czi #1	37	9.933	0.268	2.493	255
	c:3/3 - IP-ApoTome-17.czi #1	0	0	NaN	0	NaN
	c:3/3 - IP-ApoTome-17.czi #1	0	0	NaN	0	NaN
	c:3/3 - IP-ApoTome-37.czi #1	56	20.593	0.368	3.622	255
	c:3/3 - IP-ApoTome-37.czi #1	0	0	NaN	0	NaN
	c:3/3 - IP-ApoTome-36.czi #1	0	0	NaN	0	NaN
	c:3/3 - IP-ApoTome-36.czi #1	0	0	NaN	0	NaN
	c:3/3 - IP-ApoTome-35.czi #1	0	0	NaN	0	NaN
	c:3/3 - IP-ApoTome-35.czi #1	0	0	NaN	0	NaN
	c:3/3 - IP-ApoTome-35.czi #1	0	0	NaN	0	NaN
	c:3/3 - IP-ApoTome-34.czi #1	1	0.026	0.026	0.004	255
	c:3/3 - IP-ApoTome-34.czi #1	23	0.598	0.026	0.188	255
	c:3/3 - IP-ApoTome-33.czi #1	72	2.106	0.029	0.750	255
	c:3/3 - IP-ApoTome-32.czi #1	45	1.222	0.027	0.330	255
	c:3/3 - IP-ApoTome-32.czi #1	79	2.418	0.031	0.701	255
	01/04/2016 HA1nM
	c:3/3 - IP-ApoTome-21.czi #1	14	0.520	0.037	0.187	255
	c:3/3 - IP-ApoTome-20.czi #1	0	0	NaN	0	NaN
	c:3/3 - IP-ApoTome-20.czi #1	30	0.962	0.032	0.465	255
	c:3/3 - IP-ApoTome-19.czi #1	0	0	NaN	0	NaN
	c:3/3 - IP-ApoTome-17.czi #1	78	3.432	0.044	1.092	255
	c:3/3 - IP-ApoTome-15.czi #1	3	0.104	0.035	0.020	255
	c:3/3 - IP-ApoTome-13.czi #1	33	0.884	0.027	0.520	255
	c:3/3 - IP-ApoTome-13.czi #1	103	3.042	0.030	2.059	255
	c:3/3 - IP-ApoTome-11.czi #1	1	0.026	0.026	0.010	255
	c:3/3 - IP-ApoTome-11.czi #1	64	1.924	0.030	1.543	255
	c:3/3 - IP-ApoTome-10.czi #1	1	0.026	0.026	0.005	255
	c:3/3 - IP-ApoTome-08.czi #1	13	0.338	0.026	0.122	255
	c:3/3 - IP-ApoTome-05.czi #1	20	1.248	0.062	0.314	255
	c:3/3 - IP-ApoTome-04.czi #1	10	0.442	0.044	0.071	255
	c:3/3 - IP-ApoTome-01.czi #1	0	0	NaN	0	NaN
	c:3/3 - IP-ApoTome-26.czi #1	25	0.858	0.034	0.152	255
	c:3/3 - IP-ApoTome-26.czi #1	0	0	NaN	0	NaN
	c:3/3 - IP-ApoTome-25.czi #1	37	1.430	0.039	0.389	255
	c:3/3 - IP-ApoTome-25.czi #1	39	1.404	0.036	0.451	255
	c:3/3 - IP-ApoTome-24.czi #1	0	0	NaN	0	NaN
	c:3/3 - IP-ApoTome-24.czi #1	0	0	NaN	0	NaN
