# Supplementary material for: The out-of-field dose in radiation therapy induces delayed tumorigenesis by senescence evasion
Source: eLife. 2022 Mar 18;11:e67190. doi: 10.7554/eLife.67190 (PMC8933005; doi:10.7554/eLife.67190)
Supplement: Figure 7—figure supplement 1—source data 4. [file elife-67190-fig7-figsupp1-data4.xlsx]

## Sheet: Feuil1
Figure 7-figure supplement 1-source data 4
	intensité moyenne 28/04/2016 après 17 jours de traitement à l'ABT888 (A1µM ou A1nM
jc-1	rouge (PE) P3	vert (FITC) P2	rouge/vert		28/04/2016 après17 jours de traitement à l'ABT888 (A1µM ou A1nM) ou au peroxyde d'hydrogène à 5µM
NT	848	253	3.35178
H	768	241	3.18672			une diminution du ratio montre une dépolarisation mitochondriale
A1µM	649	265	2.44906
A1nM	503	222	2.26577
HA1µM	836	276	3.02899
HA1nM	1109	322	3.4441
3.35178	NT	1
3.18672	H	0.950755
2.44906	A1µM	0.730674
2.26577	A1nM	0.675989
3.02899	HA1µM	0.903695
3.4441	HA1nM	1.02754
													n
	Non treated	1
	H2O2 5µM	0.950755
	Veliparib 1µM	0.730674
	H2O2 Veliparib	0.903695
		intensité moyenne 28/04/2016 après 17 jours de traitement à l'ABT888 (A1µM ou A1nM
	jc-1	rouge (PE) P1	vert (FITC) P1	rouge/vert
	NT	594	179	3.31844
	H	486	146	3.32877
	A1µM	597	183	3.2623
	A1nM	443	124	3.57258
	HA1µM	538	175	3.07429
	HA1nM	910	263	3.46008
		3.31844	NT	1
		3.32877	H	1.00311
		3.2623	A1µM	0.983082
		3.57258	A1nM	1.07659
		3.07429	HA1µM	0.926426
		3.46008	HA1nM	1.04268
