# Supplementary material for: The out-of-field dose in radiation therapy induces delayed tumorigenesis by senescence evasion
Source: eLife. 2022 Mar 18;11:e67190. doi: 10.7554/eLife.67190 (PMC8933005; doi:10.7554/eLife.67190)
Supplement: Figure 7—figure supplement 2—source data 1. [file elife-67190-fig7-figsupp2-data1.xlsx]

## Sheet: Feuil1
01/04/2016 NT	P-XRCC1	treshold 238-460									53BP1
1/04 nt
c:2/3 - IP-ApoTome-06.czi #1	66	14.873	0.225	2.221	255
									c:3/3 - IP-ApoTome-06.czi #1	2	3.172	1.586	0.474	255
c:2/3 - IP-ApoTome-06.czi #1	16	4.862	0.304	0.408	255
									c:3/3 - IP-ApoTome-06.czi #1	0	0	NaN	0	NaN
c:2/3 - IP-ApoTome-06.czi #1	10	3.354	0.335	0.424	255
									c:3/3 - IP-ApoTome-06.czi #1	0	0	NaN	0	NaN
c:2/3 - IP-ApoTome-06.czi #1	0	0	NaN	0	NaN
									c:3/3 - IP-ApoTome-06.czi #1	0	0	NaN	0	NaN
c:2/3 - IP-ApoTome-21.czi #1	5	1.534	0.307	0.147	255
									c:3/3 - IP-ApoTome-21.czi #1	0	0	NaN	0	NaN
c:2/3 - IP-ApoTome-23.czi #1	0	0	NaN	0	NaN
									c:3/3 - IP-ApoTome-23.czi #1	0	0	NaN	0	NaN
c:2/3 - IP-ApoTome-23.czi #1	0	0	NaN	0	NaN
									c:3/3 - IP-ApoTome-23.czi #1	0	0	NaN	0	NaN
c:2/3 - IP-ApoTome-23.czi #1	3	0.728	0.243	0.092	255
									c:3/3 - IP-ApoTome-23.czi #1	0	0	NaN	0	NaN
c:2/3 - IP-ApoTome-20.czi #1	27	6.162	0.228	0.407	255
									c:3/3 - IP-ApoTome-20.czi #1	0	0	NaN	0	NaN
c:2/3 - IP-ApoTome-25.czi #1	54	15.107	0.280	3.550	255
									c:3/3 - IP-ApoTome-25.czi #1	3	0.494	0.165	0.116	255
c:2/3 - IP-ApoTome-18.czi #1	8	0.520	0.065	0.055	255
									c:3/3 - IP-ApoTome-18.czi #1	0	0	NaN	0	NaN
c:2/3 - IP-ApoTome-18.czi #1	6	0.286	0.048	0.024	255
									c:3/3 - IP-ApoTome-18.czi #1	0	0	NaN	0	NaN
c:2/3 - IP-ApoTome-16.czi #1	20	2.262	0.113	0.136	255
c:2/3 - IP-ApoTome-14.czi #1	0	0	NaN	0	NaN
									c:3/3 - IP-ApoTome-14.czi #1	0	0	NaN	0	NaN
c:2/3 - IP-ApoTome-14.czi #1	0	0	NaN	0	NaN
									c:3/3 - IP-ApoTome-14.czi #1	0	0	NaN	0	NaN
c:2/3 - IP-ApoTome-34.czi #1	1	0.026	0.026	0.002	255
									c:3/3 - IP-ApoTome-34.czi #1	0	0	NaN	0	NaN
c:2/3 - IP-ApoTome-17.czi #1	63	6.110	0.097	0.493	255
									c:3/3 - IP-ApoTome-17.czi #1	0	0	NaN	0	NaN
c:2/3 - IP-ApoTome-33.czi #1	25	2.808	0.112	0.558	255
									c:3/3 - IP-ApoTome-33.czi #1	0	0	NaN	0	NaN
c:2/3 - IP-ApoTome-32.czi #1	44	3.874	0.088	0.405	255
									c:3/3 - IP-ApoTome-32.czi #1	1	0.078	0.078	0.008	255
c:2/3 - IP-ApoTome-32.czi #1	3	0.078	0.026	0.006	255
									c:3/3 - IP-ApoTome-32.czi #1	0	0	NaN	0	NaN
c:2/3 - IP-ApoTome-28.czi #1	46	30.266	0.658	3.768	255
									c:3/3 - IP-ApoTome-28.czi #1	1	0.052	0.052	0.006	255
c:2/3 - IP-ApoTome-28.czi #1	48	21.347	0.445	2.666	255
									c:3/3 - IP-ApoTome-28.czi #1	0	0	NaN	0	NaN
c:2/3 - IP-ApoTome-19.czi #1	27	11.233	0.416	1.437	255
									c:3/3 - IP-ApoTome-19.czi #1	0	0	NaN	0	NaN
c:2/3 - IP-ApoTome-31.czi #1	87	21.113	0.243	1.471	255
									c:3/3 - IP-ApoTome-31.czi #1	1	0.078	0.078	0.005	255
c:2/3 - IP-ApoTome-31.czi #1	48	10.609	0.221	1.613	255
									c:3/3 - IP-ApoTome-31.czi #1	0	0	NaN	0	NaN
c:2/3 - IP-ApoTome-27.czi #1	0	0	NaN	0	NaN
									c:3/3 - IP-ApoTome-27.czi #1	0	0	NaN	0	NaN
c:2/3 - IP-ApoTome-27.czi #1	0	0	NaN	0	NaN
									c:3/3 - IP-ApoTome-27.czi #1	0	0	NaN	0	NaN
c:2/3 - IP-ApoTome-27.czi #1	1	0.052	0.052	0.015	255
									c:3/3 - IP-ApoTome-27.czi #1	0	0	NaN	0	NaN
c:2/3 - IP-ApoTome-27.czi #1	0	0	NaN	0	NaN
									c:3/3 - IP-ApoTome-27.czi #1	0	0	NaN	0	NaN
c:2/3 - IP-ApoTome-24.czi #1	19	5.538	0.291	0.676	255
									c:3/3 - IP-ApoTome-24.czi #1	0	0	NaN	0	NaN
c:2/3 - IP-ApoTome-24.czi #1	3	1.950	0.650	0.540	255
									c:3/3 - IP-ApoTome-24.czi #1	0	0	NaN	0	NaN
c:2/3 - IP-ApoTome-26.czi #1	10	2.002	0.200	0.786	255
c:2/3 - IP-ApoTome-07.czi #1	14	4.784	0.342	0.660	255
									c:3/3 - IP-ApoTome-07.czi #1	0	0	NaN	0	NaN
c:2/3 - IP-ApoTome-07.czi #1	47	13.781	0.293	1.972	255
									c:3/3 - IP-ApoTome-07.czi #1	2	3.172	1.586	0.454	255
c:2/3 - IP-ApoTome-07.czi #1	8	3.172	0.397	0.523	255
									c:3/3 - IP-ApoTome-07.czi #1	0	0	NaN	0	NaN
	0
										0
	0
										0
	0
										0
1/04 h
c:2/3 - IP-ApoTome-49.czi #1	91	17.993	0.198	3.021	255
									c:3/3 - IP-ApoTome-49.czi #1	1	0.052	0.052	0.009	255
c:2/3 - IP-ApoTome-49.czi #1	67	26.262	0.392	5.994	255
									c:3/3 - IP-ApoTome-49.czi #1	0	0	NaN	0	NaN
c:2/3 - IP-ApoTome-44.czi #1	48	27.068	0.564	2.579	255
									c:3/3 - IP-ApoTome-44.czi #1	0	0	NaN	0	NaN
c:2/3 - IP-ApoTome-07.czi #1	35	10.947	0.313	1.358	255
									c:3/3 - IP-ApoTome-07.czi #1	0	0	NaN	0	NaN
c:2/3 - IP-ApoTome-07.czi #1	10	1.976	0.198	0.704	255
									c:3/3 - IP-ApoTome-07.czi #1	0	0	NaN	0	NaN
c:2/3 - IP-ApoTome-06.czi #1	5	2.730	0.546	0.723	255
									c:3/3 - IP-ApoTome-06.czi #1	0	0	NaN	0	NaN
c:2/3 - IP-ApoTome-06.czi #1	7	1.040	0.149	0.128	255
									c:3/3 - IP-ApoTome-06.czi #1	0	0	NaN	0	NaN
c:2/3 - IP-ApoTome-06.czi #1	3	0.520	0.173	0.145	255
									c:3/3 - IP-ApoTome-06.czi #1	0	0	NaN	0	NaN
c:2/3 - IP-ApoTome-06.czi #1	6	1.092	0.182	0.118	255
									c:3/3 - IP-ApoTome-06.czi #1	0	0	NaN	0	NaN
c:2/3 - IP-ApoTome-06.czi #1	1	0.078	0.078	0.030	255
									c:3/3 - IP-ApoTome-06.czi #1	0	0	NaN	0	NaN
	0
										0
c:2/3 - IP-ApoTome-54.czi #1	72	80.397	1.117	7.372	255
									c:3/3 - IP-ApoTome-54.czi #1	13	2.886	0.222	0.265	255
c:2/3 - IP-ApoTome-54.czi #1	48	20.229	0.421	3.811	255
									c:3/3 - IP-ApoTome-54.czi #1	1	0.052	0.052	0.010	255
c:2/3 - IP-ApoTome-10.czi #1	9	1.664	0.185	0.199	255
									c:3/3 - IP-ApoTome-10.czi #1	0	0	NaN	0	NaN
c:2/3 - IP-ApoTome-10.czi #1	1	0.078	0.078	0.001	255
									c:3/3 - IP-ApoTome-10.czi #1	0	0	NaN	0	NaN
c:2/3 - IP-ApoTome-46.czi #1	93	42.929	0.462	4.765	255
									c:3/3 - IP-ApoTome-46.czi #1	1	0.468	0.468	0.052	255
c:2/3 - IP-ApoTome-46.czi #1	23	12.377	0.538	1.886	255
									c:3/3 - IP-ApoTome-46.czi #1	1	1.040	1.040	0.158	255
c:2/3 - IP-ApoTome-64.czi #1	160	61.650	0.385	5.725	255
									c:3/3 - IP-ApoTome-64.czi #1	2	0.234	0.117	0.022	255
c:2/3 - IP-ApoTome-64.czi #1	122	36.636	0.300	4.655	255
									c:3/3 - IP-ApoTome-64.czi #1	5	1.066	0.213	0.135	255
c:2/3 - IP-ApoTome-08.czi #1	0	0	NaN	0	NaN
									c:3/3 - IP-ApoTome-08.czi #1	0	0	NaN	0	NaN
c:2/3 - IP-ApoTome-08.czi #1	8	1.118	0.140	0.122	255
									c:3/3 - IP-ApoTome-08.czi #1	0	0	NaN	0	NaN
c:2/3 - IP-ApoTome-10.czi #1	25	14.431	0.577	0.909	255
									c:3/3 - IP-ApoTome-10.czi #1	0	0	NaN	0	NaN
c:2/3 - IP-ApoTome-10.czi #1	13	2.912	0.224	0.249	255
									c:3/3 - IP-ApoTome-10.czi #1	0	0	NaN	0	NaN
c:2/3 - IP-ApoTome-44.czi #1	50	26.756	0.535	2.315	255
									c:3/3 - IP-ApoTome-44.czi #1	0	0	NaN	0	NaN
c:2/3 - IP-ApoTome-44.czi #1	15	2.782	0.185	0.298	255
									c:3/3 - IP-ApoTome-44.czi #1	0	0	NaN	0	NaN
c:2/3 - IP-ApoTome-45.czi #1	25	5.980	0.239	0.016	255
									c:3/3 - IP-ApoTome-45.czi #1	0	0	NaN	0	NaN
c:2/3 - IP-ApoTome-45.czi #1	5	0.676	0.135	0.222	255
									c:3/3 - IP-ApoTome-45.czi #1	0	0	NaN	0	NaN
c:2/3 - IP-ApoTome-03.czi #1	76	19.657	0.259	0.607	124.069
									c:3/3 - IP-ApoTome-03.czi #1	0	0	NaN	0	NaN
1/04 a1µM
c:2/3 - IP-ApoTome-31.czi #1	18	6.318	0.351	0.959	255
									c:3/3 - IP-ApoTome-31.czi #1	0	0	NaN	0	NaN
c:2/3 - IP-ApoTome-31.czi #1	15	3.770	0.251	0.402	255
									c:3/3 - IP-ApoTome-31.czi #1	0	0	NaN	0	NaN
c:2/3 - IP-ApoTome-21.czi #1	12	3.224	0.269	0.330	255
									c:3/3 - IP-ApoTome-21.czi #1	0	0	NaN	0	NaN
	4
										0
c:2/3 - IP-ApoTome-18.czi #1	20	7.072	0.354	0.600	255
									c:3/3 - IP-ApoTome-18.czi #1	0	0	NaN	0	NaN
c:2/3 - IP-ApoTome-12.czi #1	19	1.612	0.085	0.089	255
									c:3/3 - IP-ApoTome-12.czi #1	0	0	NaN	0	NaN
c:2/3 - IP-ApoTome-12.czi #1	27	8.737	0.324	0.491	255
									c:3/3 - IP-ApoTome-12.czi #1	0	0	NaN	0	NaN
c:2/3 - IP-ApoTome-18.czi #1	20	7.072	0.354	0.600	255
									c:3/3 - IP-ApoTome-18.czi #1	0	0	NaN	0	NaN
c:2/3 - IP-ApoTome-15.czi #1	15	11.701	0.780	0.031	255
									c:3/3 - IP-ApoTome-15.czi #1	0	0	NaN	0	NaN
	0
										0
	10
										3
	20
										2
c:2/3 - IP-ApoTome-27.czi #1	34	10.453	0.307	0.787	255
									c:3/3 - IP-ApoTome-27.czi #1	0	0	NaN	0	NaN
	1
										0
c:2/3 - IP-ApoTome-25.czi #1	15	3.952	0.263	0.652	255
									c:3/3 - IP-ApoTome-25.czi #1	0	0	NaN	0	NaN
	7
										0
c:2/3 - IP-ApoTome-28.czi #1	22	2.158	0.098	0.111	255
									c:3/3 - IP-ApoTome-28.czi #1	0	0	NaN	0	NaN
	14
										0
c:2/3 - IP-ApoTome-16.czi #1	30	15.081	0.503	1.468	255
									c:3/3 - IP-ApoTome-16.czi #1	0	0	NaN	0	NaN
c:2/3 - IP-ApoTome-16.czi #1	19	8.373	0.441	1.220	255
									c:3/3 - IP-ApoTome-16.czi #1	0	0	NaN	0	NaN
c:2/3 - IP-ApoTome-41.czi #1	17	2.470	0.145	0.186	255
									c:3/3 - IP-ApoTome-41.czi #1	0	0	NaN	0	NaN
c:2/3 - IP-ApoTome-41.czi #1	22	3.614	0.164	0.329	255
									c:3/3 - IP-ApoTome-41.czi #1	0	0	NaN	0	NaN
c:2/3 - IP-ApoTome-37.czi #1	40	8.945	0.224	0.579	306.730
									c:3/3 - IP-ApoTome-37.czi #1	0	0	NaN	0	NaN
	0
										0
	0
										0
	10
										0
1/04 A1nM
c:2/3 - IP-ApoTome-28.czi #1	9	0.754	0.084	0.101	255
									c:3/3 - IP-ApoTome-28.czi #1	0	0	NaN	0	NaN
c:2/3 - IP-ApoTome-28.czi #1	0	0	NaN	0	NaN
c:2/3 - IP-ApoTome-38.czi #1	14	5.226	0.373	2.755	255
c:2/3 - IP-ApoTome-38.czi #1	19	9.023	0.475	1.813	255
									c:3/3 - IP-ApoTome-38.czi #1	0	0	NaN	0	NaN
c:2/3 - IP-ApoTome-05.czi #1	30	9.803	0.327	0.736	255
c:2/3 - IP-ApoTome-06.czi #1	13	4.602	0.354	0.798	255
									c:3/3 - IP-ApoTome-06.czi #1	0	0	NaN	0	NaN
c:2/3 - IP-ApoTome-06.czi #1	7	2.366	0.338	0.681	255
									c:3/3 - IP-ApoTome-06.czi #1	0	0	NaN	0	NaN
c:2/3 - IP-ApoTome-06.czi #1	4	0.390	0.098	0.038	255
c:2/3 - IP-ApoTome-27.czi #1	20	8.477	0.424	0.593	255				c:3/3 - IP-ApoTome-06.czi #1	0	0	NaN	0	NaN
c:2/3 - IP-ApoTome-27.czi #1	13	2.132	0.164	0.508	255
c:2/3 - IP-ApoTome-27.czi #1	7	0.624	0.089	0.079	255
c:2/3 - IP-ApoTome-07.czi #1	5	0.598	0.120	0.081	255
c:2/3 - IP-ApoTome-04.czi #1	13	4.368	0.336	0.627	255
c:2/3 - IP-ApoTome-04.czi #1	4	0.312	0.078	0.057	255
	0
	0
c:2/3 - IP-ApoTome-25.czi #1	31	7.878	0.254	1.079	255
c:2/3 - IP-ApoTome-25.czi #1	21	4.498	0.214	0.643	255
c:2/3 - IP-ApoTome-25.czi #1	25	7.358	0.294	0.843	255
c:2/3 - IP-ApoTome-17.czi #1	27	7.306	0.271	0.501	255
c:2/3 - IP-ApoTome-17.czi #1	30	5.772	0.192	0.368	255
	0
c:2/3 - IP-ApoTome-02.czi #1	14	1.820	0.130	0.146	255
c:2/3 - IP-ApoTome-13.czi #1	18	2.938	0.163	0.310	255
c:2/3 - IP-ApoTome-13.czi #1	2	0.468	0.234	0.043	255
c:2/3 - IP-ApoTome-13.czi #1	0	0	NaN	0	NaN
c:2/3 - IP-ApoTome-10.czi #1	25	4.394	0.176	0.438	255
c:2/3 - IP-ApoTome-10.czi #1	28	7.124	0.254	0.920	255
c:2/3 - IP-ApoTome-11.czi #1	17	1.794	0.106	0.304	255
c:2/3 - IP-ApoTome-11.czi #1	4	0.624	0.156	0.093	255
c:2/3 - IP-ApoTome-37.czi #1	26	5.200	0.200	0.512	255
c:2/3 - IP-ApoTome-37.czi #1	20	5.564	0.278	0.402	255
c:2/3 - IP-ApoTome-16.czi #1	12	5.096	0.425	0.667	255
c:2/3 - IP-ApoTome-16.czi #1	8	1.118	0.140	0.130	255
c:2/3 - IP-ApoTome-16.czi #1	0	0	NaN	0	NaN
	0
	0
c:2/3 - IP-ApoTome-09.czi #1	5	0.702	0.140	0.051	255
c:2/3 - IP-ApoTome-09.czi #1	0	0	NaN	0	NaN
c:2/3 - IP-ApoTome-09.czi #1	5	0.702	0.140	0.051	255
c:2/3 - IP-ApoTome-09.czi #1	0	0	NaN	0	NaN
c:2/3 - IP-ApoTome-18.czi #1	54	12.637	0.234	1.259	255
c:2/3 - IP-ApoTome-18.czi #1	58	11.909	0.205	1.276	255
c:2/3 - IP-ApoTome-18.czi #1	54	24.493	0.454	1.474	255
c:2/3 - IP-ApoTome-18.czi #1	0	0	NaN	0	NaN
1/04 HA1µM
c:2/3 - IP-ApoTome-57.czi #1	3	31.722	0.412	3.389	255
									c:3/3 - IP-ApoTome-57.czi #1	0	0	NaN	0	NaN
	0
										0
c:2/3 - IP-ApoTome-70.czi #1	5	21.919	0.300	1.843	255
									c:3/3 - IP-ApoTome-70.czi #1	0	0	NaN	0	NaN
c:2/3 - IP-ApoTome-70.czi #1	21	7.202	0.343	0.901	255
									c:3/3 - IP-ApoTome-70.czi #1	0	0	NaN	0	NaN
c:2/3 - IP-ApoTome-72.czi #1	0	39.756	0.427	4.468	255
c:2/3 - IP-ApoTome-72.czi #1	0	33.022	0.359	1.131	255
									c:3/3 - IP-ApoTome-72.czi #1	0	0	NaN	0	NaN
c:2/3 - IP-ApoTome-17.czi #1	5	0.286	0.057	0.052	255
c:2/3 - IP-ApoTome-18.czi #1	47	4.056	0.086	0.832	255
									c:3/3 - IP-ApoTome-18.czi #1	0	0	NaN	0	NaN
c:2/3 - IP-ApoTome-18.czi #1	25	3.926	0.157	1.213	255
									c:3/3 - IP-ApoTome-18.czi #1	0	0	NaN	0	NaN
c:2/3 - IP-ApoTome-18.czi #1	35	6.760	0.193	2.017	255
									c:3/3 - IP-ApoTome-18.czi #1	0	0	NaN	0	NaN
c:2/3 - IP-ApoTome-20.czi #1	47	7.150	0.152	1.303	255
c:2/3 - IP-ApoTome-68.czi #1	0	32.996	0.268	7.963	255
c:2/3 - IP-ApoTome-62.czi #1	0	32.086	0.212	3.765	255
c:2/3 - IP-ApoTome-27.czi #1	1	0.286	0.286	0.069	255
c:2/3 - IP-ApoTome-23.czi #1	9	3.354	0.373	1.122	255
									c:3/3 - IP-ApoTome-23.czi #1	0	0	NaN	0	NaN
c:2/3 - IP-ApoTome-23.czi #1	0	0	NaN	0	NaN
									c:3/3 - IP-ApoTome-23.czi #1	0	0	NaN	0	NaN
c:2/3 - IP-ApoTome-21.czi #1	28	3.276	0.117	0.851	255
c:2/3 - IP-ApoTome-24.czi #1	2	0.208	0.104	0.062	0
c:2/3 - IP-ApoTome-26.czi #1	44	4.576	0.104	0.460	255
									c:3/3 - IP-ApoTome-26.czi #1	0	0	NaN	0	NaN
c:2/3 - IP-ApoTome-29.czi #1	9	0.624	0.069	0.502	255
c:2/3 - IP-ApoTome-66.czi #1	15	2.314	0.154	0.715	255
c:2/3 - IP-ApoTome-66.czi #1	23	3.744	0.163	0.729	255
									c:3/3 - IP-ApoTome-66.czi #1	0	0	NaN	0	NaN
c:2/3 - IP-ApoTome-65.czi #1	25	4.394	0.176	0.747	255
									c:3/3 - IP-ApoTome-65.czi #1	0	0	NaN	0	NaN
c:2/3 - IP-ApoTome-39.czi #1	47	22.361	0.476	6.363	255
									c:3/3 - IP-ApoTome-39.czi #1	0	0	NaN	0	NaN
c:2/3 - IP-ApoTome-31.czi #1	26	26.912	0.317	7.500	255
1/04 HA1nM
c:2/3 - IP-ApoTome-72.czi #1	5	0.494	0.099	0.051	255
c:2/3 - IP-ApoTome-72.czi #1	0	0	NaN	0	NaN
	0
c:2/3 - IP-ApoTome-82.czi #1	18	5.122	0.285	0.677	255
	0
c:2/3 - IP-ApoTome-71.czi #1	23	5.850	0.254	0.510	255
c:2/3 - IP-ApoTome-71.czi #1	0	0	NaN	0	NaN
c:2/3 - IP-ApoTome-40.czi #1	0	0	NaN	0	NaN
c:2/3 - IP-ApoTome-40.czi #1	29	5.278	0.182	0.362	255
c:2/3 - IP-ApoTome-87.czi #1	7	2.600	0.371	0.272	255
c:2/3 - IP-ApoTome-87.czi #1	0	0	NaN	0	NaN
c:2/3 - IP-ApoTome-52.czi #1	92	35.752	0.389	1.704	255			Figure 7 – Figure supplement 2-source data 1
c:2/3 - IP-ApoTome-46.czi #1	46	7.670	0.167	0.260	255
	0
c:2/3 - IP-ApoTome-48.czi #1	24	5.928	0.247	0.632	255				cond.	Non treated	H2O2 5µM	Veliparib 1µM	Véliparib 1nM	Veliparib 1µM + H2O2	Veliparib 1nM + H2O2			cond.	Non treated	H2O2 5µM	Veliparib 1µM	Veliparib 1µM + H2O2
c:2/3 - IP-ApoTome-48.czi #1	30	8.294	0.276	1.164	255				moy.	18.6579	36.3571	15.8077	14.2667	16.68	17.2857			moy.	18.6579	36.3571	15.8077	16.68
c:2/3 - IP-ApoTome-70.czi #1	4	3.276	0.819	0.318	255				écart type	23.345	41.6104	10.3384	14.9733	17.0336	21.3346			écart type	23.345	41.6104	10.3384	17.0336
c:2/3 - IP-ApoTome-45.czi #1	34	10.713	0.315	1.365	255				student /H	0.0493693		0.0167654	0.0110063	0.0274936	0.0300057			student /H	0.0493693		0.0167654	0.0274936
c:2/3 - IP-ApoTome-45.czi #1	1	0.104	0.104	0.027	255									0.895033								0.895033
	0								student /NT		0.0493693	0.509796	0.321773	0.69917	0.778502			student /NT		0.0493693	0.509796	0.69917
c:2/3 - IP-ApoTome-53.czi #1	16	2.184	0.137	0.255	255						*									*
c:2/3 - IP-ApoTome-53.czi #1	5	1.378	0.276	0.301	255
c:2/3 - IP-ApoTome-41.czi #1	19	5.590	0.294	0.796	255
c:2/3 - IP-ApoTome-41.czi #1	0	0	NaN	0	NaN
c:2/3 - IP-ApoTome-84.czi #1	40	12.637	0.316	0.672	255
c:2/3 - IP-ApoTome-83.czi #1	0	0	NaN	0	NaN
c:2/3 - IP-ApoTome-69.czi #1	28	7.696	0.275	0.708	255
c:2/3 - IP-ApoTome-68.czi #1	9	1.352	0.150	0.503	255
c:2/3 - IP-ApoTome-68.czi #1	15	4.758	0.317	0.958	255
c:2/3 - IP-ApoTome-67.czi #1	7	0.936	0.134	0.065	255
c:2/3 - IP-ApoTome-67.czi #1	0	0	NaN	0	NaN
c:2/3 - IP-ApoTome-66.czi #1	36	14.171	0.394	1.051	255
c:2/3 - IP-ApoTome-65.czi #1	28	7.358	0.263	0.444	255
c:2/3 - IP-ApoTome-65.czi #1	0	0	NaN	0	NaN
c:2/3 - IP-ApoTome-65.czi #1	0	0	NaN	0	NaN
c:2/3 - IP-ApoTome-64.czi #1	44	7.774	0.177	0.644	255
c:2/3 - IP-ApoTome-64.czi #1	20	10.193	0.510	0.755	255
c:2/3 - IP-ApoTome-63.czi #1	25	4.186	0.167	0.355	255
c:2/3 - IP-ApoTome-63.czi #1	0	0	NaN	0	NaN
	0
	0
c:2/3 - IP-ApoTome-55.czi #1	10	0.884	0.088	0.076	255
c:2/3 - IP-ApoTome-55.czi #1	58	15.913	0.274	1.468	255
c:2/3 - IP-ApoTome-57.czi #1	2	0.338	0.169	0.066	255
c:2/3 - IP-ApoTome-57.czi #1	45	5.200	0.116	0.263	255
c:2/3 - IP-ApoTome-56.czi #1	50	22.413	0.448	1.603	255
c:2/3 - IP-ApoTome-56.czi #1	6	1.274	0.212	0.207	255
c:2/3 - IP-ApoTome-61.czi #1	71	31.462	0.443	1.566	255
c:2/3 - IP-ApoTome-61.czi #1	0	0	NaN	0	NaN
