# Supplementary material for: The out-of-field dose in radiation therapy induces delayed tumorigenesis by senescence evasion
Source: eLife. 2022 Mar 18;11:e67190. doi: 10.7554/eLife.67190 (PMC8933005; doi:10.7554/eLife.67190)
Supplement: Figure 7—figure supplement 2—source data 2. [file elife-67190-fig7-figsupp2-data2.xlsx]

## Sheet: Feuil1
Figure 7 – Figure supplement 2-source data 2
2016-03-25	PNK	Treshold : 1000-1500
NT
c:2/2 - IP-ApoTome-22.czi #1	69	8.971	0.130	3.496	255
c:2/2 - IP-ApoTome-22.czi #1	43	3.692	0.086	0.970	255		COND	Non treated	H2O2 5µM	Veliparib 1µM	Veliparib + H2O2
c:2/2 - IP-ApoTome-22.czi #1	78	11.207	0.144	4.657	255		MOYENNE	72.0698	147.812	83.9394	56.88
c:2/2 - IP-ApoTome-22.czi #1	63	7.592	0.121	4.597	255		ECART	65.9875	160.116	84.0695	56.3762
c:2/2 - IP-ApoTome-22.czi #1	63	8.347	0.132	3.454	255		TEST/H	0.007951		0.0254237	0.00240404
c:2/2 - IP-ApoTome-21.czi #1	28	1.118	0.040	0.162	255		TEST/NT		0.007951	0.253263	0.0578511
c:2/2 - IP-ApoTome-21.czi #1	3	0.156	0.052	0.011	255				**
c:2/2 - IP-ApoTome-17.czi #1	304	34.972	0.115	4.217	255
c:2/2 - IP-ApoTome-17.czi #1	164	10.843	0.066	1.683	255
c:2/2 - IP-ApoTome-17.czi #1	234	26.210	0.112	2.609	255
c:2/2 - IP-ApoTome-07.czi #1	185	13.027	0.070	3.011	255
c:2/2 - IP-ApoTome-07.czi #1	186	42.747	0.230	6.796	255
c:2/2 - IP-ApoTome-07.czi #1	97	11.363	0.117	1.892	255
c:2/2 - IP-ApoTome-07.czi #1	45	3.328	0.074	0.901	255
c:2/2 - IP-ApoTome-07.czi #1	17	1.508	0.089	0.657	255
c:2/2 - IP-ApoTome-10.czi #1	132	49.195	0.373	8.140	255
c:2/2 - IP-ApoTome-10.czi #1	47	4.394	0.093	0.928	255
c:2/2 - IP-ApoTome-10.czi #1	21	1.508	0.072	0.664	255
c:2/2 - IP-ApoTome-10.czi #1	26	1.976	0.076	0.504	255
c:2/2 - IP-ApoTome-20.czi #1	35	2.964	0.085	0.696	255
c:2/2 - IP-ApoTome-20.czi #1	46	5.070	0.110	1.196	255
c:2/2 - IP-ApoTome-20.czi #1	55	5.278	0.096	0.966	255
c:2/2 - IP-ApoTome-20.czi #1	44	3.978	0.090	0.755	255
c:2/2 - IP-ApoTome-20.czi #1	94	13.079	0.139	2.634	255
c:2/2 - IP-ApoTome-20.czi #1	10	0.624	0.062	0.199	255
c:2/2 - IP-ApoTome-16.czi #1	80	7.332	0.092	1.199	255
c:2/2 - IP-ApoTome-16.czi #1	5	0.442	0.088	0.115	255
c:2/2 - IP-ApoTome-11.czi #1	5	0.312	0.062	0.040	255
c:2/2 - IP-ApoTome-11.czi #1	0	0	NaN	0	NaN
c:2/2 - IP-ApoTome-15.czi #1	54	4.628	0.086	1.493	255
c:2/2 - IP-ApoTome-15.czi #1	23	6.812	0.296	4.767	255
c:2/2 - IP-ApoTome-15.czi #1	86	14.015	0.163	2.429	255
c:2/2 - IP-ApoTome-13.czi #1	130	17.473	0.134	5.460	255
c:2/2 - IP-ApoTome-13.czi #1	83	11.753	0.142	2.810	255
c:2/2 - IP-ApoTome-13.czi #1	69	7.878	0.114	2.336	255
c:2/2 - IP-ApoTome-06.czi #1	140	11.805	0.084	0.983	255
c:2/2 - IP-ApoTome-06.czi #1	3	0.962	0.321	0.119	255
c:2/2 - IP-ApoTome-09.czi #1	92	9.595	0.104	2.365	255
c:2/2 - IP-ApoTome-09.czi #1	14	2.574	0.184	1.098	255
c:2/2 - IP-ApoTome-09.czi #1	39	3.276	0.084	0.464	255
c:2/2 - IP-ApoTome-02.czi #1	71	9.153	0.129	3.568	255
c:2/2 - IP-ApoTome-02.czi #1	107	9.725	0.091	1.600	255
c:2/2 - IP-ApoTome-02.czi #1	9	7.540	0.838	2.177	255
H
	0
c:2/2 - IP-ApoTome-41.czi #1	116	20.047	0.173	2.553	255
c:2/2 - IP-ApoTome-57.czi #1	9	0.728	0.081	0.113	255
c:2/2 - IP-ApoTome-57.czi #1	0	0	NaN	0	NaN
c:2/2 - IP-ApoTome-52.czi #1	215	24.753	0.115	4.305	255
c:2/2 - IP-ApoTome-53.czi #1	22	10.219	0.464	3.275	255
c:2/2 - IP-ApoTome-53.czi #1	185	53.277	0.288	9.702	255
c:2/2 - IP-ApoTome-53.czi #1	85	24.025	0.283	2.854	255
c:2/2 - IP-ApoTome-53.czi #1	62	6.032	0.097	0.509	255
c:2/2 - IP-ApoTome-39.czi #1	111	24.545	0.221	3.248	255
c:2/2 - IP-ApoTome-54.czi #1	165	70.412	0.427	10.902	255
c:2/2 - IP-ApoTome-56.czi #1	152	90.225	0.594	10.595	255
c:2/2 - IP-ApoTome-58.czi #1	157	30.864	0.197	5.551	255
c:2/2 - IP-ApoTome-46.czi #1	310	33.308	0.107	2.384	255
	0
	0
c:2/2 - IP-ApoTome-55.czi #1	123	38.378	0.312	7.493	255
c:2/2 - IP-ApoTome-62.czi #1	42	3.666	0.087	0.290	255
c:2/2 - IP-ApoTome-40.czi #1	773	102.498	0.133	4.153	255
c:2/2 - IP-ApoTome-59.czi #1	482	124.261	0.258	13.096	255
c:2/2 - IP-ApoTome-45.czi #1	140	21.295	0.152	10.034	1133.469
c:2/2 - IP-ApoTome-37.czi #1	87	22.751	0.262	4.685	255
c:2/2 - IP-ApoTome-37.czi #1	226	40.536	0.179	12.043	255
c:2/2 - IP-ApoTome-37.czi #1	98	19.423	0.198	11.823	255
c:2/2 - IP-ApoTome-38.czi #1	36	5.772	0.160	0.981	255
c:2/2 - IP-ApoTome-42.czi #1	101	13.469	0.133	2.571	255
c:2/2 - IP-ApoTome-42.czi #1	127	57.411	0.452	16.241	255
c:2/2 - IP-ApoTome-35.czi #1	6	0.390	0.065	0.109	255
c:2/2 - IP-ApoTome-33.czi #1	241	58.270	0.242	11.256	255
c:2/2 - IP-ApoTome-33.czi #1	377	106.346	0.282	11.267	255
c:2/2 - IP-ApoTome-32.czi #1	104	44.775	0.431	9.280	255
c:2/2 - IP-ApoTome-32.czi #1	178	49.793	0.280	13.006	255
A1µM
c:2/2 - IP-ApoTome-75.czi #1	216	133.024	0.205	6.880	255
c:2/2 - IP-ApoTome-73.czi #1	202	153.513	0.253	11.370	255
c:2/2 - IP-ApoTome-72.czi #1	76	17.317	0.075	1.348	255
c:2/2 - IP-ApoTome-71.czi #1	33	7.748	0.078	1.079	255
c:2/2 - IP-ApoTome-71.czi #1	106	40.562	0.127	7.101	255
c:2/2 - IP-ApoTome-70.czi #1	14	4.758	0.108	0.839	255
c:2/2 - IP-ApoTome-70.czi #1	14	4.758	0.108	0.839	255
c:2/2 - IP-ApoTome-67.czi #1	391	223.899	0.191	11.039	255
c:2/2 - IP-ApoTome-66.czi #1	119	29.330	0.082	1.782	255
c:2/2 - IP-ApoTome-65.czi #1	61	12.741	0.069	0.683	255
c:2/2 - IP-ApoTome-64.czi #1	146	78.733	0.179	8.106	255
c:2/2 - IP-ApoTome-64.czi #1	128	44.905	0.117	5.246	255
c:2/2 - IP-ApoTome-63.czi #1	76	23.817	0.104	4.886	255
c:2/2 - IP-ApoTome-89.czi #1	1	0.156	0.078	0.061	255
c:2/2 - IP-ApoTome-88.czi #1	8	1.508	0.060	0.182	255
c:2/2 - IP-ApoTome-87.czi #1	70	18.279	0.086	2.326	255
c:2/2 - IP-ApoTome-86.czi #1	82	47.219	0.191	11.178	255
c:2/2 - IP-ApoTome-86.czi #1	93	38.976	0.139	8.553	255
c:2/2 - IP-ApoTome-85.czi #1	87	69.190	0.264	12.696	255
c:2/2 - IP-ApoTome-85.czi #1	5	4.810	0.283	1.268	255
c:2/2 - IP-ApoTome-84.czi #1	7	10.817	0.252	2.643	255
c:2/2 - IP-ApoTome-84.czi #1	10	6.240	0.101	1.059	255
c:2/2 - IP-ApoTome-83.czi #1	73	30.552	0.138	3.478	255
c:2/2 - IP-ApoTome-83.czi #1	34	8.086	0.079	1.337	255
c:2/2 - IP-ApoTome-82.czi #1	120	40.822	0.113	1.954	255
c:2/2 - IP-ApoTome-82.czi #1	35	10.895	0.102	2.093	255
c:2/2 - IP-ApoTome-81.czi #1	12	2.574	0.072	0.149	255
c:2/2 - IP-ApoTome-79.czi #1	45	17.343	0.128	2.554	255
c:2/2 - IP-ApoTome-77.czi #1	54	61.780	0.377	14.400	255
c:2/2 - IP-ApoTome-77.czi #1	39	38.820	0.329	13.292	255
c:2/2 - IP-ApoTome-76.czi #1	202	143.269	0.236	10.084	255
c:2/2 - IP-ApoTome-76.czi #1	202	143.269	0.236	10.084	255
c:2/2 - IP-ApoTome-76.czi #1	9	6.682	0.230	2.727	255
A1nM
c:2/2 - IP-ApoTome-106.czi #1	188	32.476	0.173	6.462	255
c:2/2 - IP-ApoTome-106.czi #1	166	32.658	0.197	6.008	255
c:2/2 - IP-ApoTome-105.czi #1	179	38.144	0.213	8.615	255
c:2/2 - IP-ApoTome-105.czi #1	262	80.579	0.308	14.437	255
c:2/2 - IP-ApoTome-105.czi #1	49	17.291	0.353	5.059	255
c:2/2 - IP-ApoTome-105.czi #1	100	8.529	0.085	1.784	255
c:2/2 - IP-ApoTome-104.czi #1	263	34.790	0.132	2.650	255
c:2/2 - IP-ApoTome-92.czi #1	148	12.637	0.085	1.476	255
c:2/2 - IP-ApoTome-92.czi #1	22	1.482	0.067	0.571	255
c:2/2 - IP-ApoTome-94.czi #1	263	30.474	0.116	3.590	255
c:2/2 - IP-ApoTome-94.czi #1	104	13.027	0.125	1.338	255
c:2/2 - IP-ApoTome-94.czi #1	42	8.529	0.203	2.304	255
c:2/2 - IP-ApoTome-103.czi #1	95	19.865	0.209	5.626	255
c:2/2 - IP-ApoTome-103.czi #1	76	7.904	0.104	3.435	255
c:2/2 - IP-ApoTome-103.czi #1	170	26.314	0.155	3.830	255
c:2/2 - IP-ApoTome-103.czi #1	41	4.576	0.112	1.892	255
c:2/2 - IP-ApoTome-103.czi #1	69	10.089	0.146	3.890	255
c:2/2 - IP-ApoTome-102.czi #1	170	19.501	0.115	2.553	255
c:2/2 - IP-ApoTome-102.czi #1	67	9.543	0.142	3.060	255
c:2/2 - IP-ApoTome-102.czi #1	48	4.238	0.088	1.194	255
c:2/2 - IP-ApoTome-102.czi #1	200	21.503	0.108	3.739	255
c:2/2 - IP-ApoTome-102.czi #1	90	9.101	0.101	1.509	255
c:2/2 - IP-ApoTome-101.czi #1	56	4.134	0.074	1.056	255
c:2/2 - IP-ApoTome-101.czi #1	4	0.234	0.059	0.031	255
c:2/2 - IP-ApoTome-101.czi #1	15	1.014	0.068	0.171	255
c:2/2 - IP-ApoTome-101.czi #1	0	0	NaN	0	NaN
c:2/2 - IP-ApoTome-96.czi #1	15	0.910	0.061	0.085	255
c:2/2 - IP-ApoTome-96.czi #1	0	0	NaN	0	NaN
c:2/2 - IP-ApoTome-96.czi #1	0	0	NaN	0	NaN
c:2/2 - IP-ApoTome-100.czi #1	8	0.572	0.072	0.082	255
c:2/2 - IP-ApoTome-100.czi #1	194	17.005	0.088	2.473	255
c:2/2 - IP-ApoTome-97.czi #1	112	13.989	0.125	3.991	255
c:2/2 - IP-ApoTome-97.czi #1	119	21.685	0.182	6.567	255
c:2/2 - IP-ApoTome-97.czi #1	3	0.390	0.130	0.091	255
c:2/2 - IP-ApoTome-97.czi #1	21	3.510	0.167	0.372	255
c:2/2 - IP-ApoTome-97.czi #1	112	13.989	0.125	3.991	255
c:2/2 - IP-ApoTome-97.czi #1	119	21.685	0.182	6.567	255
c:2/2 - IP-ApoTome-97.czi #1	3	0.390	0.130	0.091	255
c:2/2 - IP-ApoTome-97.czi #1	21	3.510	0.167	0.372	255
c:2/2 - IP-ApoTome-95.czi #1	105	12.585	0.120	2.024	255
c:2/2 - IP-ApoTome-99.czi #1	12	3.874	0.323	1.146	255
c:2/2 - IP-ApoTome-99.czi #1	138	33.100	0.240	5.659	255
c:2/2 - IP-ApoTome-99.czi #1	145	21.477	0.148	4.411	255
c:2/2 - IP-ApoTome-99.czi #1	87	10.791	0.124	2.614	255
c:2/2 - IP-ApoTome-99.czi #1	68	9.491	0.140	2.905	255
HA1µM
HA1nm
c:2/2 - IP-ApoTome-08.czi #1	3	0.208	0.035	0.010	255
c:2/2 - IP-ApoTome-04.czi #1	52	18.773	0.090	1.313	1162.884
c:2/2 - IP-ApoTome-03.czi #1	155	23.765	0.076	2.355	255
c:2/2 - IP-ApoTome-03.czi #1	85	10.115	0.059	1.400	255
c:2/2 - IP-ApoTome-02.czi #1	20	0.988	0.049	0.111	255
c:2/2 - IP-ApoTome-02.czi #1	21	0.988	0.049	0.111	255
c:2/2 - IP-ApoTome-32.czi #1	69	14.561	0.106	1.167	255
c:2/2 - IP-ApoTome-32.czi #1	3	0.312	0.052	0.036	255
c:2/2 - IP-ApoTome-31.czi #1	86	27.042	0.311	6.633	255
c:2/2 - IP-ApoTome-31.czi #1	60	6.240	0.052	0.758	255
c:2/2 - IP-ApoTome-31.czi #1	10	0.702	0.035	0.117	255
	0
	0
	0
c:2/2 - IP-ApoTome-18.czi #1	63	41.603	0.165	7.455	255
c:2/2 - IP-ApoTome-18.czi #1	49	22.803	0.116	5.205	255
c:2/2 - IP-ApoTome-18.czi #1	70	111.807	0.395	14.489	255
c:2/2 - IP-ApoTome-17.czi #1	158	27.718	0.088	3.072	255
c:2/2 - IP-ApoTome-17.czi #1	174	41.576	0.119	6.143	255
c:2/2 - IP-ApoTome-16.czi #1	135	102.342	0.167	8.029	255
c:2/2 - IP-ApoTome-13.czi #1	142	189.473	0.332	20.466	255
c:2/2 - IP-ApoTome-12.czi #1	28	14.561	0.127	2.245	255
c:2/2 - IP-ApoTome-11.czi #1	27	8.737	0.079	1.301	255
c:2/2 - IP-ApoTome-11.czi #1	8	3.094	0.193	0.498	255
c:2/2 - IP-ApoTome-11.czi #1	4	1.638	0.182	0.515	255
