# Supplementary material for: The out-of-field dose in radiation therapy induces delayed tumorigenesis by senescence evasion
Source: eLife. 2022 Mar 18;11:e67190. doi: 10.7554/eLife.67190 (PMC8933005; doi:10.7554/eLife.67190)
Supplement: Figure 7—figure supplement 3—source data 1. [file elife-67190-fig7-figsupp3-data1.xlsx]

## Sheet: Feuil1
culture cellulaire : Erwan GOY								F6MC
boite routine : 200 000/ WB : 100 000/ IF : 20 000/ SA B GAL: 50 000
DP : (log ( cell collecté /cell étalée)/log2) + ancien DP
date	condition	Nombre de cellules encemmencées	nbr de cellules comptées (* 104)	ancien DP	nvx DP	remarque
2016-02-22	NT	20	225	36.5566	40.0484
2016-02-29	NT	20	56	40.0484	41.5339		jours		Non treated	H2O2 5µM	Veliparib 1µM	Veliparib 1nM	H2O2 + Veliparib 1µM	H2O2 + Veliparib 1nM
	H	20	48	40.0484	41.3115		0	2016-02-22	40.0484	40.0484	40.0484	40.0484	40.0484	40.0484
	A1µM	20	52	40.0484	41.4269		7	2016-02-29	41.5339	41.3115	41.4269	41.3115	41.3115	41.3115
	A1nM	20	48	40.0484	41.3115		12	2016-03-05	43.7969	43.4814	42.7489	43.69	42.449	42.6334
	HA1µM	20	48	40.0484	41.3115		17	2016-03-10	46.1754	44.6189	44.6937	46.1754	44.5194	44.3115
	HA1nM	20	48	40.0484	41.3115		24	2016-03-17	48.5539	45.9974	46.9417	48.4973	46.6569	45.449
2016-03-05	NT	20	96	41.5339	43.7969		31	2016-03-24	50.8758	47.5824	48.749	50.6673	48.0354	47.127
	H	20	90	41.3115	43.4814		39	2016-04-01	52.8758	48.9043	50.7125	52.7377	48.5208	49.2145
	A1µM	20	50	41.4269	42.7489		49	2016-04-11	54.0134	50.0418	51.7125	53.545	48.5208	49.2145
	A1nM	20	104	41.3115	43.69		56	2016-04-18	55.4284	51.7199	53.3906	55.1927	48.6139	49.3951
	HA1µM	20	44	41.3115	42.449		68	2016-05-05	56.9809	53.4568	55.0072	56.8708	49.707	50.5326
	HA1nM	20	50	41.3115	42.6334		75	2016-05-27	57.9809	54.55	55.9583	57.6643	50.8876	51.6257
2016-03-10	NT	20	104	43.7969	46.1754
	H	20	44	43.4814	44.6189
	A1µM	20	77	42.7489	44.6937
	A1nM	20	112	43.69	46.1754
	HA1µM	20	84	42.449	44.5194
	HA1nM	20	64	42.6334	44.3115
2016-03-17	NT	20	104	46.1754	48.5539
	H	20	52	44.6189	45.9974
	A1µM	20	95	44.6937	46.9417
	A1nM	20	100	46.1754	48.4973													l
	HA1µM	20	88	44.5194	46.6569												y
	HA1nM	20	44	44.3115	45.449
2016-03-24	NT	20	100	48.5539	50.8758
	H	20	60	45.9974	47.5824
	A1µM	20	70	46.9417	48.749
	A1nM	20	90	48.4973	50.6673
	HA1µM	20	52	46.6569	48.0354
	HA1nM	20	64	45.449	47.127
2016-04-01	NT	20	80	50.8758	52.8758
	H	20	50	47.5824	48.9043
	A1µM	20	78	48.749	50.7125
	A1nM	20	84	50.6673	52.7377
	HA1µM	20	28	48.0354	48.5208
	HA1nM	20	85	47.127	49.2145
2016-04-11	NT	20	44	52.8758	54.0134
	H	20	44	48.9043	50.0418
	A1µM	20	40	50.7125	51.7125
	A1nM	20	35	52.7377	53.545
	HA1µM	20	20	48.5208	48.5208
	HA1nM	20	20	49.2145	49.2145
2016-04-18	NT	15	40	54.0134	55.4284
	H	15	48	50.0418	51.7199
	A1µM	15	48	51.7125	53.3906
	A1nM	15	47	53.545	55.1927
	HA1µM	15	16	48.5208	48.6139
	HA1nM	15	17	49.2145	49.3951
2016-05-05	NT	15	44	55.4284	56.9809
	H	15	50	51.7199	53.4568
	A1µM	15	46	53.3906	55.0072
	A1nM	15	48	55.1927	56.8708
	HA1µM	15	32	48.6139	49.707
	HA1nM	15	33	49.3951	50.5326
2016-05-27	NT	15	30	56.9809	57.9809
	H	15	32	53.4568	54.55
	A1µM	15	29	55.0072	55.9583
	A1nM	15	26	56.8708	57.6643
	HA1µM	15	34	49.707	50.8876
	HA1nM	15	32	50.5326	51.6257
								1 DP en 1,5 jours
								1 DP en 3,5 jour

## Sheet: graph
Figure 7 – Figure supplement 3-source data 1
F6MC	jours	Non treated	H2O2 5µM	Veliparib 1µM	Veliparib 1nM	H2O2 + Veliparib 1µM	H2O2 + Veliparib 1nM
	0	40.0484	40.0484	40.0484	40.0484	40.0484	40.0484
	7	41.5339	41.3115	41.4269	41.3115	41.3115	41.3115
	12	43.7969	43.4814	42.7489	43.69	42.449	42.6334
	17	46.1754	44.6189	44.6937	46.1754	44.5194	44.3115
	24	48.5539	45.9974	46.9417	48.4973	46.6569	45.449
	31	50.8758	47.5824	48.749	50.6673	48.0354	47.127
	39	52.8758	48.9043	50.7125	52.7377	48.5208	49.2145
	49	54.0134	50.0418	51.7125	53.545	48.5208	49.2145
	56	55.4284	51.7199	53.3906	55.1927	48.6139	49.3951
	68	56.9809	53.4568	55.0072	56.8708	49.707	50.5326
	75	57.9809	54.55	55.9583	57.6643	50.8876	51.6257
