# Supplementary material for: The out-of-field dose in radiation therapy induces delayed tumorigenesis by senescence evasion
Source: eLife. 2022 Mar 18;11:e67190. doi: 10.7554/eLife.67190 (PMC8933005; doi:10.7554/eLife.67190)
Supplement: Figure 7—figure supplement 3—source data 2. [file elife-67190-fig7-figsupp3-data2.xlsx]

## Sheet: Feuil1
date	condition	nombre de cellules totales	nombre de cellules positive	rapport							MOYENNE
2016-02-29	NT	21	1	0.047619						jours	NT	H2O2 5µM	Veliparib 1µM	Veliparib 1nM	H2O2 Veliparib 1µM	H2O2 Veliparib 1nM
		19	0	0						2016-02-29	0.0471934	0.0151515	0.043144	0.0173822	0.01587	0.0215514
		25	6	0.24						2016-03-08	0.0239843	0.0278097	0.0258119	0.0192593	0.0461844	0.0333865
		12	1	0.0833333						2016-03-17	0.0298039	0.057432	0.0273228	0.0080632	0.0637792	0.057066
		15	0	0						2016-04-01	0.222982	0.219985	0.35	0.251833	0.549768	0.561855
		14	1	0.0714286
		16	0	0							écartype
		13	1	0.0769231						jours	NT	H2O2 5µM	Veliparib 1µM	Veliparib 1nM	H2O2 Veliparib 1µM	H2O2 Veliparib 1nM
		22	0	0						2016-02-29	0.0667874	0.0502519	0.0502519	0.0533223	0.0211165	0.0286701
		27	0	0						2016-03-08	0.0332609	0.0310688	0.03	0.032812	0.0489373	0.0374665
		14	0	0						2016-03-17	0.0401632	0.0502945	0.040513	0.0143165	0.0630438	0.0579859
		26	0	0						2016-04-01	0.0918005	0.114934	0.09	0.133346	0.179212	0.157286
		12	0	0
		24	2	0.0833333							t.test
		19	2	0.105263						jours	NT	H2O2 5µM	Veliparib 1µM	Veliparib 1nM	H2O2 Veliparib 1µM	H2O2 Veliparib 1nM
	total NT	279		0.0471934	0.0667874					2016-02-29		0.0877799	0.427892	0.0598223	0.0538151	0.0993055
	H5µM	26	0	0						2016-03-08		0.382996	0.469038	0.367697	0.144739	0.256879
		18	3	0.166667						2016-03-17		0.0680755	0.44084	0.0665988	0.0711971	0.0988951
		21	0	0						2016-04-01		0.462887	0.179955	0.0299553	1.52723e-06	0.00116134
		29	0	0
		24	0	0
		19	0	0
		16	0	0
		21	0	0
		1	0	0
		28	0	0
		26	0	0
	total H	229		0.0151515	0.0502519	0.0877799
2016-02-29	A1µM	19	3	0.157895
		17	2	0.117647
		12	0	0
		14	0	0
		16	1	0.0625
		20	1	0.05
		13	0	0
		24	0	0
		21	2	0.0952381
		16	0	0
		26	2	0.0769231
		23	2	0.0869565
		26	0	0
		25	0	0
		17	0	0
	total A1µM	289		0.043144	0.0533223	0.427892
2016-02-29	A1nM	42	0	0
		46	2	0.0434783
		59	1	0.0169492
		46	1	0.0217391
		39	1	0.025641
		34	0	0
		32	1	0.03125
		36	0	0
	total A1nM	334		0.0173822	0.0163319	0.0598223
2016-02-29	HA1µM	20	0	0
		17	0	0
		35	1	0.0285714
		20	1	0.05
		22	0	0
		32	0	0
		24	1	0.0416667
		32	0	0
		36	0	0
		26	1	0.0384615
	total HA1µM	264		0.01587	0.0211165	0.0538151
2016-02-29	HA1nM	28	0	0
		19	0	0
		34	1	0.0294118
		26	2	0.0769231
		28	0	0
		37	1	0.027027
		30	2	0.0666667
		45	0	0
		20	0	0
		34	0	0
		27	1	0.037037
	total HA1nM	328		0.0215514	0.0286701	0.0993055
2016-03-08	NT	28	2	0.0714286
		27	1	0.037037
		39	1	0.025641
		38	0	0
		29	1	0.0344828
		27	0	0
		20	0	0
		21	2	0.0952381
		24	0	0
		22	0	0
		44	0	0
	total NT	319		0.0239843	0.0332609
	H2o2 5µM	18	1	0.0555556
		14	1	0.0714286
		32	0	0
		22	0	0
		24	1	0.0416667
		21	1	0.047619
		25	0	0
		29	0	0
		23	1	0.0434783
		49	0	0
		31	0	0
		22	2	0.0909091
		24	1	0.0416667
		17	0	0
		19	1	0.0526316
		22	0	0
	total H2o2	392		0.0278097	0.0310688	0.382996
	A1µM	20	0	0
		41	1	0.0243902
		18	0	0
		31	0	0
		30	0	0
		21	0	0
		33	2	0.0606061
		23	1	0.0434783
		36	1	0.0277778
		27	2	0.0740741
		44	2	0.0454545
		33	0	0
	total A1µM	357		0.0258119	0.0272115	0.469038
	A1nM	27	0	0
		33	0	0
		37	1	0.027027
		11	0	0
		23	1	0.0434783
		33	0	0
		30	0	0
		33	2	0.0606061
		20	2	0.1
		31	0	0
		39	0	0
		28	0	0
	total A1nM	345		0.0192593	0.032812	0.367697
	HA1µM	55	1	0.0181818
		44	1	0.0227273
		43	4	0.0930233
		45	0	0
		34	1	0.0294118
		33	0	0
		43	3	0.0697674
		44	6	0.136364
	total HA1µM	341		0.0461844	0.0489373	0.144739
	HA1nM	30	0	0
		25	2	0.08
		33	1	0.030303
		22	1	0.0454545
		21	1	0.047619
		23	0	0
		20	0	0
		15	0	0
		23	1	0.0434783
		22	0	0
		25	1	0.04
		16	2	0.125
		18	1	0.0555556
		20	0	0
	total HA1nM	313		0.0333865	0.0374665	0.256879
2016-03-17	NT	35	3	0.0857143
		36	0	0
		44	2	0.0454545
		27	3	0.111111
		31	0	0
		47	1	0.0212766
		35	0	0
		30	0	0
		29	1	0.0344828
		24	0	0
2016-03-17	total NT	338		0.0298039	0.0401632
2016-03-17	H	18	1	0.0555556
		17	2	0.117647
		13	1	0.0769231
		18	1	0.0555556
		28	2	0.0714286
		18	1	0.0555556
		20	0	0
		24	0	0
		20	2	0.1
		13	2	0.153846
		26	1	0.0384615
		27	0	0
		25	0	0
		18	0	0
		15	2	0.133333
		33	2	0.0606061
2016-03-17	total H	333		0.057432	0.0502945	0.0680755
2016-03-17	A1µM	18	1	0.0555556
		20	1	0.05
		21	1	0.047619
		22	0	0
		25	0	0
		32	0	0
		21	0	0
		20	0	0
		15	2	0.133333
		25	1	0.04
		24	0	0
		25	0	0
		24	2	0.0833333
		23	0	0
		18	0	0
2016-03-17	total A1µM	333		0.0273228	0.040513	0.44084
2016-03-17	A1nM	49	1	0.0204082
		32	1	0.03125
		26	0	0
		27	0	0
		24	0	0
		20	0	0
		28	0	0
		33	0	0
		34	0	0
		35	0	0
		27	1	0.037037
2016-03-17	total A1nM	335		0.0080632	0.0143165	0.0665988
2016-03-17	HA1µM	28	4	0.142857
		34	1	0.0294118
		24	4	0.166667
		31	0	0
		28	1	0.0357143
		34	0	0
		23	1	0.0434783
		18	2	0.111111
		18	2	0.111111
		34	0	0
		28	0	0
		24	3	0.125
2016-03-17	total HA1µM	324		0.0637792	0.0630438	0.0711971
2016-03-17	HA1nM	30	0	0
		35	1	0.0285714
		29	3	0.103448
		21	2	0.0952381
		18	3	0.166667
		19	2	0.105263
		20	0	0
		31	0	0
		26	0	0
		28	1	0.0357143
		25	3	0.12
		23	2	0.0869565
		20	0	0
2016-03-17	total HA1nM	325		0.057066	0.0579859	0.0988951
2016-04-01	NT	13	4	0.307692
	NT	11	4	0.363636
	NT	8	3	0.375
	NT	10	2	0.2
	NT	12	4	0.333333
	NT	20	3	0.15
	NT	17	5	0.294118
	NT	11	3	0.272727
	NT	17	2	0.117647
	NT	19	2	0.105263
	NT	11	3	0.272727
	NT	16	3	0.1875
	NT	27	4	0.148148
	NT	18	3	0.166667
	NT	18	5	0.277778
	NT	14	4	0.285714
	NT	15	1	0.0666667
	NT	18	2	0.111111
	NT	23	4	0.173913
	NT	16	4	0.25
2016-04-01	total NT	314		0.222982	0.0918005
2016-04-01	H	20	3	0.15		14	1	0.0714286
	H	24	2	0.0833333		13	0	0
	H	18	4	0.222222		26	3	0.115385
	H	15	2	0.133333		39	5	0.128205
	H	19	2	0.105263		26	2	0.0769231
	H	21	2	0.0952381		3	0	0
	H	20	2	0.1		28	0	0
	H	12	5	0.416667		18	0	0
	H	20	1	0.05		32	4	0.125
	H	19	3	0.157895		33	7	0.212121
	H	19	4	0.210526		43	0	0
	H	17	3	0.176471		275		0.0662784
	H	11	3	0.272727
	H	11	2	0.181818
	H	15	5	0.333333
	H	8	4	0.5
	H	22	5	0.227273
	H	23	6	0.26087
	H	14	5	0.357143
	H	9	2	0.222222
	H	20	5	0.25
	H	18	6	0.333333
2016-04-01	total H	375		0.219985	0.114934	0.462887
2016-04-01	A1µM	22	3	0.136364		39	7	0.179487
	A1µM	25	7	0.28		31	4	0.129032
	A1µM	28	9	0.321429		24	4	0.166667
	A1µM	16	7	0.4375		42	15	0.357143
	A1µM	20	6	0.3		43	9	0.209302
	A1µM	23	7	0.304348		27	1	0.037037
	A1µM	17	7	0.411765		37	7	0.189189
	A1µM	23	2	0.0869565		29	8	0.275862
	A1µM	24	6	0.25		35	6	0.171429
	A1µM	24	5	0.208333		46	8	0.173913
	A1µM	27	6	0.222222		21	4	0.190476
	A1µM	19	5	0.263158		374		0.189049
	A1µM	15	4	0.266667
	A1µM	24	4	0.166667
	A1µM	25	5	0.2
	A1µM	23	4	0.173913
2016-04-01	total A1µM	355		0.251833	0.0932433	0.179955
2016-04-01	A1nM	55	12	0.218182				35	5	0.142857
		45	10	0.222222				40	5	0.125
		45	7	0.155556				32	8	0.25
		36	12	0.333333				45	7	0.155556
		44	13	0.295455				54	17	0.314815
		36	12	0.333333				65	0	0
		35	11	0.314286				46	2	0.0434783
		34	22	0.647059				39	0	0
		38	11	0.289474				356		0.128963
		39	15	0.384615
		407		0.319351	0.133346	0.0299553
2016-04-01	HA1µM	24	7	0.291667
	HA1µM	21	14	0.666667				40	15	0.375
	HA1µM	23	17	0.73913				47	19	0.404255
	HA1µM	19	19	1				54	18	0.333333
	HA1µM	24	17	0.708333				66	34	0.515152
	HA1µM	29	12	0.413793				38	20	0.526316
	HA1µM	27	12	0.444444				34	17	0.5
	HA1µM	23	9	0.391304				37	8	0.216216
	HA1µM	30	14	0.466667				45	22	0.488889
	HA1µM	25	15	0.6				30	8	0.266667
	HA1µM	23	10	0.434783				391		0.40287
	HA1µM	23	11	0.478261
	HA1µM	33	19	0.575758
	HA1µM	21	13	0.619048
	HA1µM	24	10	0.416667
2016-04-01	HA1µM	369		0.549768	0.179212	1.52723e-06
2016-04-01	HA1nM	122	53	0.434426
		54	20	0.37037				30	8	0.266667
		70	36	0.514286				18	10	0.555556
		42	33	0.785714				21	1	0.047619
		58	33	0.568966				23	6	0.26087
		76	53	0.697368				10	4	0.4
2016-04-01	HA1nM	422		0.561855	0.157286	0.00116134		18	8	0.444444
								17	5	0.294118
								12	5	0.416667
								20	4	0.2
								14	4	0.285714
								24	6	0.25
								19	12	0.631579
								23	3	0.130435
								249		0.321821

## Sheet: graph
Figure 7 – Figure supplement 3-source data 2
SABGAL	MEAN
jours	Non treated	H2O2 5µM	Veliparib 1µM	Veliparib 1nM	H2O2 + Veliparib 1µM	H2O2 + Veliparib 1nM
7	0.0471934	0.0151515	0.043144	0.0173822	0.01587	0.0215514
15	0.0239843	0.0278097	0.0258119	0.0192593	0.0461844	0.0333865
24	0.0298039	0.057432	0.0273228	0.0080632	0.0637792	0.057066
39	0.222982	0.219985	0.35	0.251833	0.549768	0.561855
	SD
jours	NT	H2O2 5µM	Veliparib 1µM	Veliparib 1nM	H2O2 + Veliparib 1µM	H2O2 + Veliparib 1nM
7	0.0667874	0.0502519	0.0502519	0.0533223	0.0211165	0.0286701
15	0.0332609	0.0310688	0.03	0.032812	0.0489373	0.0374665
24	0.0401632	0.0502945	0.040513	0.0143165	0.0630438	0.0579859
39	0.0918005	0.114934	0.09	0.133346	0.179212	0.157286
	t.test
jours	NT	H2O2 5µM	Veliparib 1µM	Veliparib 1nM	H2O2 + Veliparib 1µM	H2O2 + Veliparib 1nM
7		0.0877799	0.427892	0.0598223	0.0538151	0.0993055
15		0.382996	0.469038	0.367697	0.144739	0.256879
24		0.0680755	0.44084	0.0665988	0.0711971	0.0988951
39		0.462887	0.179955	0.0299553	1.52723e-06	0.00116134
	t.test
jours	NT	H2O2 5µM	Veliparib 1µM	Veliparib 1nM	H2O2 + Veliparib 1µM	H2O2 + Veliparib 1nM
7		NS	NS	NS	NS	NS
15		NS	NS	NS	NS	NS
24		NS	NS	NS	NS	NS
39		NS	NS	*	***	**
