# Supplementary material for: The out-of-field dose in radiation therapy induces delayed tumorigenesis by senescence evasion
Source: eLife. 2022 Mar 18;11:e67190. doi: 10.7554/eLife.67190 (PMC8933005; doi:10.7554/eLife.67190)
Supplement: Figure 7—figure supplement 4—source data 1. [file elife-67190-fig7-figsupp4-data1.xlsx]

## Sheet: Feuil1
Figure 7-figure supplement 4-source data 1
	P1	c12FDG gate NT	c12fdg gate autoF
Non treated	155	315	209
H2O2 5µM	227	360	280
Véliparib 1µM	172	333	232
Véliparib + H2O2	202	373	290
replicative senescent	224	334	275
NT	1
H2O2 5µM	1.46452
Véliparib 1µM	1.10968
Véliparib + H2O2	1.30323																	a
sénescente	1.44516
Non treated	11
H2O2 5µM	12
Veliparib 1µM	13
Veliparib + H2O2	22
repliative senescent	36
