# Supplementary material for: The out-of-field dose in radiation therapy induces delayed tumorigenesis by senescence evasion
Source: eLife. 2022 Mar 18;11:e67190. doi: 10.7554/eLife.67190 (PMC8933005; doi:10.7554/eLife.67190)
Supplement: Figure 7—figure supplement 4—source data 3. [file elife-67190-fig7-figsupp4-data3.xlsx]

## Sheet: Feuil1
Figure 7-figure supplement 4-source data 3
annV IP = dead cell
	Q1	Q2	Q3	Q4	Q1+Q2+Q4
NT	3.5	5.9	90.5	0.1	9.5	100			Non treated	9.5
H	4	8.9	86.8	0.3	13.2	100			H2O2 5µM	13.2
Veliparib 1µM	2.8	5.9	91.1	0.3	9	100.1			Veliparib 1µM	9
A1nM	2.9	7.3	89.7	0.2	10.4	100.1			Veliparib 1µM + H2O2	13.7
Veliparib 1µM + H2O2	4	9.4	86.4	0.3	13.7	100.1
Ha1nM	4.2	10.9	84.7	0.3	15.4	100.1
