# Supplementary material for: The out-of-field dose in radiation therapy induces delayed tumorigenesis by senescence evasion
Source: eLife. 2022 Mar 18;11:e67190. doi: 10.7554/eLife.67190 (PMC8933005; doi:10.7554/eLife.67190)
Supplement: Figure 7—source data 1. [file elife-67190-fig7-data1.xlsx]

## Sheet: Feuil1
Figure 7-source data 1
														D0	D8	D11	D14	D18	D21	D25
day 25														0	8	11	14	18	21	25
	veliparib+h2o2	veliparib 1µM	H2O2 5µM	NT									nt	1.70455	1.60606	0.958333	0.960784	1.69767	4.66667	8.28571
8	23	1	4	6									H2O2 5µM	0.965517	1.34375	0.864865	1.64	8.06383	11.4848	11.4444
8	78	25	5	0									veliparib 1µM	1.68571	1.36364	3.41667	8.83333	10.75	16.4062	16.55
8	21	68	4	1									veliparib+h2o2	3.95238	1.75	1.5	24	37.6154	42.3529	44.1111
8	75	0	2	0
8	35	15	2	4
8	18	44	30	11
8	61	53	11	2
8	16	11	53	11
8	111	7	11	28															0	D0	D8	D11	D14	D18	D21	D25
8	33	3	38	30																0	8	11	14	18	21	25
8	41	0	20	6															nt	1.70455	1.60606	0.958333	0.960784	1.69767	4.66667	8.28571
8	36	15	20	8															H2O2 5µM	0.965517	1.34375	0.864865	1.64	8.06383	11.4848	11.4444
8	60	0	7	7															veliparib 1µM	1.68571	1.36364	3.41667	8.83333	10.75	16.4062	16.55
8	66	26	0	11															veliparib+h2o2	3.95238	1.75	1.5	24	37.6154	42.3529	44.1111
8	58	23	0	13															0	0	0	0	0	0	0	0
8	7	4	5	5															0	0	0	0	0	0	0	0
8	15	1	21	21															0	0	0	0	0	0	0	0
8	30	13	12	16
8	50	12	2	5
8	25	10	1	26
8	25		19	6
8	9		2	4
8	62		1	8
	63		3	1
	71		1	2																				0	veliparib+h2o2	3.95238	1.75	1.5	24	37.6154
	88		1	0																			0	0	0	0	0	0	0	0
	14		17	0																			0	0	0	0	0	0	0	0
			19	0																			0	0	0	0	0	0	0	0
			9																				0	0	0	0	0	0	0	0
			29
			19
			14
			0
			10																				ecart type
			1
			19																			1	3	4	5	6	7	8
																					nt	1.51856	2.35769	1.12208	0.999215	1.42319	6.26323	8.70018
																					h2o2	1.08505	1.94454	1.03178	1.49666	11.6103	11.622	12.1619
																					abt888	2.06898	1.76056	4.25202	27.5	12.9489	9.90327	18.8916
																					abt888+h2o2	4.73398	1.84132	1.96638	41.6921	30.176	38.1623	27.1567
day 21																								t-test
7	38	15	3	0																		1	3	4	5	6	7	8
7	16	17	7	1																	h2o2	0.115402	0.00203735	0.000512543	0.0236878	0.372217	0.31295	0.00897624
7	30	5	6	0																	abt888	0.482107	0.332362	0.00547574	0.00168276	0.00117435	0.000240472	0.0401813
7	72	32	1	0																	abt888+h2o2	0.0278277	0.0278277	0.164494	0.0157327	0.000523424	0.000333087	8.6135e-09
7	34	9	12	0
7	16	34	23	19
7	41	7	22	10
7	103	1	1	7
7	137	13	33	12
7	72	4	33	1
7	86	2	12	2
7	20	32	3	1
7	21	19	2	14
		0	1	0
		0	2	0
		0	0	0
		0	29	0
		4	19	1
		7	5	1
		1	1	0
		10	3	11
		1	7	26
		8	0	0
		14	27	8
		3	1	10
		17	1	13
		3	12	3
		5	1	11
		1	38	3
		1	24	2
			10	12
			20	2
			20	7
				3
				0
				0
				0
				1
				1
day 18
6	27	3	16	5
6	87	0	19	0
6	31	0	10	1
6	39	2	3	4
6	26	2	1	0
6	33	44	19	2
6	4	6	11	2
6	11	22	7	1
6	13	32	38	1
6	101	12	3	0
6	12	8	1	2
6	70	2	30	4
6	35	0	1	6
		1	4	3
		10	1	3
		0	5	2
		43	1	1
		20	0	1
		3	12	1
		2	38	2
		10	1	2
		11	0	2
		9	0	0
		16	0	1
			0	0
			0	3
			0	2
			1	3
			7	0
			0	2
			0	3
			0	0
			2	3
			3	1
			1	2
			0	1
			0	2
			1	2
			2	0
			31	1
			2	2
			16	0
			4	0
			30
			1
			38
			19
day 14
5	11	10	1	2
5	18	2	1	0
5	58	0	0	1
5	44	0	0	2
5	11	0	0	0
5	2	0	0	1
5	20	25	0	2
5	19	6	0	4
5	7	0	2	3
5	2	39	2	2
5	2	0	3	2
5	174	20	1	4
5	5	28	2	0
5	54	79	0	0
5	3	35	1	0
5	2	0	4	1
5	0	0	4	1
5	0	0	2	0
		0	2	0
		0	2	1
		0	5	0
		2	3	0
		1	0	1
		0	3	2
		0	3	0
		53		0
		34		1						e
		33		1
		18		1
		8		1
		7		1
		125		1
				1
				2
				1
				0
				0
				0
				1
				1
				1
				0
				1
				0
				2
				1
				0
				2
				1
				0
				0
day 11
				3
4	4	15	0	2
4	5	9	0	0
4	0	2	0	0
4	6	5	0	1
4	2	15	0	0
4	1	7	0	0
4	0	5	0	0
4	2	3	1	2
4	2	2	1	1
4	0	3	0	1
4	2	4	0	0
4	0	2	0	4
4	0	1	0	0
4	0	0	0	2
4	0	0	0	0
4	0	0	0	0
		1	0	2
		0	0	0
		0	2	1
		0	1	1
		2	3	2
		3	2	1
		2	2	0
		1	2
			1
			0
			1
			2
			0
			2
			2
			1
			3
			3
			0
			1
			2
day 8
3	2	0	8	1
3	2	0	7	1
3	4	1	1	0
3	1	2	1	0
3	3	4	2	0
3	3	3	0	0
3	0	0	0	0
3	3	1	1	0
3	1	6	0	1
3	3	5	0	1
3	7	2	0	5
3	2	1	0	4
3	1	1	2	0
3	1	2	1	0
3	1	0	2	7
3	1	0	4	3
3	0	0	1	1
3	0	2	1	2
3	0	0	1	0
3	0	0	1	1
		0	1	0
		0	4	3
			2	4
			2	0
1	5		0	0
			0	0
			1	0
			0	0
			0	2
			0	4
			0	3
				10
			0	0
day 0
1	1	1	0	3
1	6	1	2	2
1	7	9	1	1
1	2	2	3	4
1	3	1	2	0
1	14	4	0	0
1	1	0	1	0
1	5	0	2	0
1	0	0	1	1
1	2	0	2	2
1	0	0	2	1
1	0	6	4	0
1	2	4	2	0
1	18	2	0	0
1	2	1	0	2
1	0	0	0	2
1	2	3	2	2
1	4	3	0	0
1	7	2	0	4
1	2	1	0	4
		6	0	3
		2	1	2
		0	0	0
		0	0	0
		0	0	3
		2	1	4
		1	1	2
		1	1	4
		0	0	0
		0		0
		0		3
		3		1
		1		2
		2		0
		1		4
				4
				3
				4
				0
				2
				1
				3
				2
				0
