# Supplementary material for: The out-of-field dose in radiation therapy induces delayed tumorigenesis by senescence evasion
Source: eLife. 2022 Mar 18;11:e67190. doi: 10.7554/eLife.67190 (PMC8933005; doi:10.7554/eLife.67190)
Supplement: Figure 7—source data 2. [file elife-67190-fig7-data2.xlsx]

## Sheet: Feuil1
figure 7-source data 2
		MOYENNE								ECART TYPE
	Day									NT	CTR+H2O2	CTR+ABT888	CTR+H2O2+ABT888
		NT	H2O2	veliparib	H2O2 + veliparib				Day
	0	0.0153848	0.0153848	0.0153848	0.0153848				0	0.0249224	0.0249224	0.0249224	0.0249224
	4	0.0269072	0.0278097	0.00884636	0.0338012				4	0.0292056	0.0310688	0.0164606	0.0316587
	8	0.0322121	0.0244544	0.0206868	0.0222039				8	0.0215975	0.0211361	0.0223583	0.0299413
	11	0.0183333	0.0326816	0.02209	0.0385727				11	0.0280737	0.0424139	0.0343907	0.0315904
	14	0.0234323	0.0119924	0.0556708	0.0643891				14	0.0249358	0.0205479	0.0482094	0.0705235
	18	0.0110094	0.0190216	0.0346976	0.0233456				18	0.0142176	0.0154081	0.0264186	0.0197437
	21	0.021064	0.0272831	0.0336387	0.049957				21	0.030795	0.034425	0.0572476	0.0828565
	25	0.0118976	0.0648326	0.0654928	0.150124				25	0.0127594	0.0382404	0.0597091	0.0535185
	31	0.0499598	0.107099	0.175781	0.383329				31	0.039545	0.0500254	0.0962657	0.130535
	46	0.470627	0.47399	0.400357	0.174058				46	0.112685	0.125136	0.125745	0.087998
													test stat
														CTR+H2O2	CTR+ABT888	CTR+H2O2+ABT888
													Day
													0	0.5	0.5	0.5
													4	0.470561	0.0522993	0.297213
													8	0.2581	0.16966	0.240748		p<0,05
													11	0.160387	0.372223	0.0636274		p<0,01
													14	0.116979	0.0214031	0.0134764		p<0,001
													18	0.177438	0.0251242	0.103516
													21	0.307252	0.209206	0.0584688
													25	0.00265269	0.0195707	6.12226e-05
													31	0.00203123	5.16642e-05	2.26132e-10
													46	0.470685	0.0557024	2.14509e-08
																		ECART TYPE
																		NT	CTR+H2O2	CTR+ABT888	CTR+H2O2+ABT888
					NT	H2O2	veliparib	H2O2 + veliparib									Day
				0	0.0153848	0.0153848	0.0153848	0.0153848									0	0.0249224	0.0249224	0.0249224	0.0249224
				14	0.0234323	0.0119924	0.0556708	0.0643891									14	0.0249358	0.0205479	0.0482094	0.0705235
				25	0.0118976	0.0648326	0.0654928	0.150124									25	0.0127594	0.0382404	0.0597091	0.0535185
				31	0.0499598	0.107099	0.175781	0.383329									31	0.039545	0.0500254	0.0962657	0.130535
																	46	0.112685	0.125136	0.125745	0.087998
				NT	H2O2 5µM	Veliparib 1µM	H2O2 + veliparib
			31	0.0499598	0.107099	0.175781	0.383329
			46	0.470627	0.47399	0.400357	0.174058
