# Supplementary material for: The out-of-field dose in radiation therapy induces delayed tumorigenesis by senescence evasion
Source: eLife. 2022 Mar 18;11:e67190. doi: 10.7554/eLife.67190 (PMC8933005; doi:10.7554/eLife.67190)
Supplement: Figure 7—source data 3. [file elife-67190-fig7-data3.xlsx]

## Sheet: Feuil1
figure 7-source data 3
culture cellulaire : Erwan GOY
boite routine : 200 000/ WB : 100 000/ IF : 20 000/ SA B GAL: 50 000
DP : (log ( cell collecté /cell étalée)/log2) + ancien DP
date	condition	Nombre de cellules encemmencées	nbr de cellules comptées (* 104)	ancien DP	nvx DP	remarque
4/09/2015 (D0)	NHDF	200000	2140000		44.07
08/09/2015 (D1)	NT	200000	760000	44.07	45.996	boite encemmencé à 200 000 cellules
	h2o2 5 µM	200000	540000	44.07	45.503
	ABT888 1µM	200000	600000	44.07	45.655
	h2o2 5 µM + ABT888 1µm	200000	640000	44.07	45.7481
12/09/2015 D5	NT	200000	1500000	45.996	48.9029	boite encemmencé à 200 000 cellules
	h2o2 5 µM	200000	860000	45.503	47.6073
	ABT888 1µM	200000	1040000	45.655	48.0335
	h2o2 5 µM + ABT888 1µm	200000	1440000	45.7481	48.5961
15/09/2015 (D8)	NT	200000	960000	48.9029	51.1659	boite encemmencé à 200 000 cellules
	h2o2 5 µM	200000	1240000	47.6073	50.2396
	ABT888 1µM	200000	860000	48.0335	50.1378
	h2o2 5 µM + ABT888 1µm	200000	680000	48.5961	50.3616
18/09/2015 D(11)	NT	200000	840000	51.1659	53.2363	boite encemmencé à 200 000 cellules
	h2o2 5 µM	200000	1180000	50.2396	52.8003
	ABT888 1µM	200000	940000	50.1378	52.3705
	h2o2 5 µM + ABT888 1µm	200000	320000	50.3616	51.0397
22/09/2015 D14	NT	200000	640000	53.2363	54.9144	boite encemmencé à 200 000 cellules
	h2o2 5 µM	200000	500000	52.8003	54.1222
	ABT888 1µM	200000	480000	52.3705	53.6335
	h2o2 5 µM + ABT888 1µm	200000	400000	51.0397	52.0397
		200000
25/09/2015 D17	NT	200000	560000	54.9144	56.3998	boite encemmencé à 200 000 cellules
	h2o2 5 µM	200000	620000	54.1222	55.7545
	ABT888 1µM	200000	480000	53.6335	54.8965
	h2o2 5 µM + ABT888 1µm	200000	440000	52.0397	53.1772
29/09/2015 D21	NT	200000	850000	56.3998	58.4873
	h2o2 5 µM	200000	440000	55.7545	56.892
	ABT888 1µM	200000	380000	54.8965	55.8225
	h2o2 5 µM + ABT888 1µm	200000	460000	53.1772	54.3788
2/10/2015 D24	NT	200000	560000	58.4873	59.9727
	h2o2 5 µM	200000	360000	56.892	57.74
	ABT888 1µM	200000	340000	55.8225	56.5881
	h2o2 5 µM + ABT888 1µm	200000	260000	54.3788	54.7573
5/10/2015 d27	NT	200000	340000	59.9727	60.7382	ensemmencé à 150 000 cellules
	h2o2 5 µM	200000	380000	57.74	58.666
	ABT888 1µM	200000	440000	56.5881	57.7256
	h2o2 5 µM + ABT888 1µm	200000	220000	54.7573	54.8948
09/10/2015 D31	NT	150000	260000	60.7382	61.5318
	h2o2 5 µM	150000	350000	58.666	59.8884
	ABT888 1µM	150000	250000	57.7256	58.4625
	h2o2 5 µM + ABT888 1µm	150000	150000	54.8948	54.8948
13/10/2015 D35	NT	150000	220000	61.5318	62.0843
	h2o2 5 µM	150000	180000	59.8884	60.1514
	ABT888 1µM	150000	200000	58.4625	58.8776
	h2o2 5 µM + ABT888 1µm	150000	140000	54.8948	54.7953
20/10/2015 D42	NT	150000	400000	62.0843	63.4994
	h2o2 5 µM	150000	360000	60.1514	61.4144
	ABT888 1µM	150000	280000	58.8776	59.778
	h2o2 5 µM + ABT888 1µm	150000	380000	54.7953	56.1363
25/10/2015 D47	NT	150000	200000	63.4994	63.9144
	h2o2 5 µM	150000	240000	61.4144	62.0925
	ABT888 1µM	150000	240000	59.778	60.4561
	h2o2 5 µM + ABT888 1µm	150000	420000	56.1363	57.6218
31/10/2015 D54	NT	150000	180000	63.9144	64.1774
	h2o2 5 µM	150000	150000	62.0925	62.0925
	ABT888 1µM	150000	180000	60.4561	60.7192
	h2o2 5 µM + ABT888 1µm	150000	540000	57.6218	59.4698
06/11/2015 D60	NT	150000	180000	64.1774	64.4405
	h2o2 5 µM	150000	150000	62.0925	62.0925
	ABT888 1µM	150000	160000	60.7192	60.8123
	h2o2 5 µM + ABT888 1µm	150000	360000	59.4698	60.7328
16/11/2015 D70	NT	150000	150000	64.4405	64.4405
	h2o2 5 µM	150000	140000	62.0925	61.993
	ABT888 1µM	150000	145000	60.8123	60.7634
	h2o2 5 µM + ABT888 1µm	150000	280000	60.7328	61.6333
23/11/2015 D77	NT	150000	150000	64.4405	64.4405
	h2o2 5 µM	140000	130000	61.993	61.8861
	ABT888 1µM	145000	135000	60.7634	60.6603
	h2o2 5 µM + ABT888 1µm	150000	200000	61.6333	62.0483
28/11/2015 D82	NT	150000	150000	64.4405	64.4405
	h2o2 5 µM	130000	120000	61.8861	61.7706
	ABT888 1µM	135000	120000	60.6603	60.4903
	h2o2 5 µM + ABT888 1µm	150000	200000	62.0483	62.4633
					#DIV/0!
					#DIV/0!
05/12/2015 d90	NT	150000	150000	64.4405	64.4405
	h2o2 5 µM + ABT888 1µm	150000	180000	62.4633	62.7264
					#DIV/0!
					#DIV/0!
					#DIV/0!
					#DIV/0!
					#DIV/0!
					#DIV/0!
					#DIV/0!
					#DIV/0!
18/12/2015 day 102	NT	150000	150000	64.4405	64.4405
	h2o2 5 µM + ABT888 1µm	150000	150000	62.7264	62.7264
					#DIV/0!
2015-12-22	NT	150000	150000	64.4405	64.4405
	h2o2 5 µM + ABT888 1µm	150000	150000	62.7264	62.7264
		Non-treated	H2O2	Veliparib	Veliparib + H2O2
Date	Day
2015-09-04	0	44.07	44.07	44.07	44.07
2015-09-08	4	45.99	45.5	45.65	45.74
2015-09-12	8	48.9	47.6	48.03	48.59
2015-09-15	11	51.16	50.23	50.13	50.36
2015-09-18	14	53.23	52.8	52.37	51.03
2015-09-22	18	54.91	54.12	53.63	52.03
2015-09-25	21	56.39	55.75	54.89	53.17
2015-09-29	25	58.49	56.89	55.82	54.37
2015-10-02	28	59.97	57.73	56.58	54.75
2015-10-05	31	60.73	58.66	57.72	54.89
2015-10-09	35	61.5	59.88	58.46	54.89
2015-10-13	39	62.0843	60.1514	58.8776	54.7953
2015-10-20	46	63.4994	61.4144	59.778	56.1363
2015-10-25	51	63.9144	62.0925	60.4561	57.6218
2015-10-31	58	64.1774	62.0925	60.7192	59.4698		jeune	1 DP en 1,5 jours
2015-11-06	64	64.4405	62.0925	60.8123	60.7328		emergente	1 DP en 3,5 jour
2015-11-16	74	64.4405	61.993	60.7634	61.6333
2015-11-23	81	64.4405	61.8861	60.6603	62.0483
2015-11-28	86	64.4405	61.7706	60.4903	62.4633
2015-12-05	94	64.4405			62.7264
2015-12-18	102	64.4405			62.7264
22 12 2015	106	64.4405			62.7264
2015-12-28	112	64.4405			62.7264
