# Supplementary material for: The out-of-field dose in radiation therapy induces delayed tumorigenesis by senescence evasion
Source: eLife. 2022 Mar 18;11:e67190. doi: 10.7554/eLife.67190 (PMC8933005; doi:10.7554/eLife.67190)
Supplement: Figure 7—source data 4. [file elife-67190-fig7-data4.xlsx]

## Sheet: Feuil2
Figure 7-source data 4
Measurement count: 1 Filter: 570
			1	2	3	moyenne	écart type		4	5	6	moyenne	écart type
			jeune( DP22)						emergente ( DP 59)
A	DMSO	D0	0.296	0.292	0.297	0.295	0.00264575		0.24	0.241	0.243	0.241333	0.00152753
B		D4	0.873	0.883	0.892	0.882667	0.00950438		0.294	0.293	0.293	0.293333	0.00057735
C		D8	1.998	2.056	2.039	2.031	0.0298161		0.464	0.468	0.471	0.467667	0.00351188
D		contrôle	0.039	0.037	0.036	0.0373333	0.00152753		0.038	0.038	0.036	0.0373333	0.0011547
E	6-TG (200 µM)	D0	0.265	0.271	0.27	0.268667	0.00321455		0.217	0.219	0.223	0.219667	0.00305505
F		D4	0.148	0.147	0.15	0.148333	0.00152753		0.253	0.259	0.254	0.255333	0.00321455
G		D8	0.154	0.155	0.156	0.155	0.001		0.543	0.541	0.539	0.541	0.002
			1	2	3	moyenne	écart type		4	5	6	moyenne	écart type
			jeune( DP22)						emergente ( DP 59)
BRUT	DMSO	D0	0.296	0.292	0.297	0.295	0.00264575		0.24	0.241	0.243	0.241333	0.00152753
		D4	0.873	0.883	0.892	0.882667	0.00950438		0.294	0.293	0.293	0.293333	0.00057735
		D8	1.998	2.056	2.039	2.031	0.0298161		0.464	0.468	0.471	0.467667	0.00351188
	6-TG (200 µM)	D0	0.265	0.271	0.27	0.268667	0.00321455		0.217	0.219	0.223	0.219667	0.00305505
		D4	0.148	0.147	0.15	0.148333	0.00152753		0.253	0.259	0.254	0.255333	0.00321455
		D8	0.154	0.155	0.156	0.155	0.001		0.543	0.541	0.539	0.541	0.002
			1	2	3						4	5	6
			jeune( DP22)								emergente ( DP 59)
normalized	DMSO	D0	1	1	1						1	1	1
		D4	2.94932	3.02397	3.00337						1.225	1.21577	1.20576
		D8	6.75	7.0411	6.86532						1.93333	1.94191	1.93827
	6-TG (200 µM)	D0	1	1	1						1	1	1
		D4	0.558491	0.542435	0.555556						1.1659	1.18265	1.13901
		D8	0.581132	0.571956	0.577778						2.5023	2.47032	2.41704
						mean	SD							mean	SD	T-test
% of surviving 6-TG		D0	100	100	100	100	0				100	100	100	100	0
		D4	18.9362	17.9378	18.4978	18.4573	0.500419				95.1754	97.2759	94.4643	95.6385	1.46189	2.37181e-05	***
		D8	8.60936	8.12311	8.41589	8.38279	0.244813				129.43	127.211	124.701	127.114	2.36585	0.000113657	***
		Day 0			Day 4			Day 8
		ExpG	PSNE		ExpG	PSNE		ExpG	PSNE
	Mean	100	100		18.4573	95.6385		8.38279	127.114
	SD	0	0		0.500419	1.46189		0.244813	2.36585
